# Supplementary material for: HTLV-1-Induced Neuroimmunome Correlates with Disease Progression and Severity
Source: Research Square preprint supplement (doi:10.21203/rs.3.rs-7357522/v1), 2025-09-09
Supplement: Supplementary file 1 [file 807046ae3e43699dc9038537.xlsx]

## Sheet: ReadMe
Supplementary Tables
ST1 – Supplementary Table 1 – Cell markers used for annotation and classification in single-cell datasets
ST4 – Supplementary Table 2 – KEGG gene sets associated with enriched pathways
ST5 – Supplementary Table 3 – List of datasets included in the meta-analysis
ST6 – Supplementary Table 4 – Appyter tool results applied for biological pathway interpretation
ST7 – Supplementary Table 5 – Data matrix used for statistical modeling and machine learning analysis
ST8 - Supplementary Table 6 - Functional Classification of Neurotransmission Pathway Genes

## Sheet: ST1
Cell types	Markers
T CD4	CD4 and CD3E
T CD8	CD8A
B cells	CD19
Myeloid cells	CD14 and CD68
Natural killer	NKG7
Malignant T cells	Foxp3, MYC, IL2RA, and PLCG1

## Sheet: ST2
Cholinergic synapse	Dopaminergic synapse	GABAergic synapse	Glutamatergic synapse	Serotonergic synapse	Neuroactive ligand-receptor interaction
CHRNB2	PPP2R1A	GABRA3	HOMER2	HTR5A	TRHR
CHRNB4	MAPK13	GABRA2	HOMER3	CYP2C9	TAAR9
SLC5A7	PPP1CA	GABRQ	HOMER1	CYP2C8	NPFF
CHRM3	MAPK14	KCNJ6	GRIN2D	RAF1	TAAR8
CHRM4	PPP1CB	PLCL1	GRIN2C	APP	TAAR5
CHRM1	MAPK11	GABBR2	GRIN1	ADCY5	TAAR6
CHRNA4	MAPK12	GABRA1	GRIN3A	ALOX12B	CCK
CHRM2	MAPK10	GABRP	GRIN3B	ARAF	GRIN2D
CHRNA3	CALM2	SLC12A5	GLS2	GNG2	TAAR1
ADCY1	CALM3	GABBR1	ADCY1	NRAS	GRIN2C
CHRNA6	CALM1	GABRA6	SLC1A1	CYP4X1	PDYN
CHRM5	ATF2	GABRA5	SLC1A2	GNG4	TAAR2
CHRNA7	CALML6	GABRA4	ADCY5	GNG3	APLN
ADCY5	ATF6B	GNG13	SLC1A3	CYP2D7	HTR5A
ADCY4	ADCY5	GNG12	ADCY4	GNG5	GRIN3A
ADCY3	CALML3	GNAO1	ADCY3	CYP2D6	SST
ADCY2	CALML4	HAP1	ADCY2	GNG8	GRIN3B
ADCY9	CALML5	GABRB3	SLC1A6	ALOX5	LPAR6
ADCY8	COMT	GABRB2	ADCY9	GNG7	LEP
ADCY7	ARNTL	GLS2	GLS	PRKCG	AGTR2
ADCY6	GNG2	GABRB1	SLC1A7	KCND2	AGTR1
GNG2	KIF5A	ADCY1	ADCY8	PLA2G4E	VIP
CREB3L1	PPP1CC	ADCY5	ADCY7	MAP2K1	PRSS2
NRAS	CREB3L1	ADCY4	ADCY6	PLA2G4F	SCT
GNG4	GNG4	ADCY3	GNG2	PLA2G4C	VIPR2
GNG3	GNG3	ADCY2	GNG4	PLA2G4D	PRSS1
CREB3L4	CREB3L4	ADCY9	GNG3	PLA2G4A	VIPR1
GNG5	GNG5	GLS	GNG5	PLA2G4B	C3AR1
AKT3	AKT3	ABAT	GNG8	PRKCB	PTH2
CREB3L2	CREB3L2	ADCY8	GNG7	PRKCA	NTSR1
GNG8	GNG8	ADCY7	PRKCG	ALOX15B	GPR156
CREB3L3	KIF5C	ADCY6	SLC38A2	GNB1	PRSS3
GNG7	CREB3L3	GNG2	SLC38A1	GNB3	NTSR2
AKT1	GNG7	GNGT2	PLA2G4E	GNAQ	PTGDR
AKT2	KIF5B	GABRR3	PLA2G4F	GNB2	PARD3
PRKCG	AKT1	GNGT1	PLA2G4C	GNB5	AVPR1A
MAP2K1	AKT2	GABRR2	PLA2G4D	GNAS	NMBR
PRKCB	PRKCG	GNG4	PLA2G4A	GNB4	AVPR1B
PRKCA	PRKCB	GABRR1	PLA2G4B	CACNA1A	MC1R
CREB3	PRKCA	GNG3	PRKCB	CACNA1C	CCKBR
CREB1	CREB3	GNG5	PRKCA	CACNA1B	PTGFR
GNB1	GNAL	GNG8	DLG4	CACNA1D	CRHR1
PIK3R1	CREB1	GNG7	GNB1	CACNA1F	NPFFR1
GNB3	GNB1	NSF	GNB3	CYP2C19	NPFFR2
GNAQ	PPP1R1B	PRKCG	GNAQ	HTR6	OXTR
GNB2	GNB3	GABARAPL2	GNB2	CYP2C18	LHB
GNB5	GNAQ	SLC38A2	GNB5	SLC6A4	LPAR2
GNB4	GNB2	GABARAPL1	GNAS	HTR4	LPAR3
ATF4	GNB5	SLC38A1	GNB4	PRKACG	LPAR4
CREB5	GNAS	SLC32A1	GRIA2	GNG11	RXFP1
CACNA1A	GNB4	GAD2	GRIA3	HTR7	ADCYAP1R1
CACNA1C	LRTOMT	GAD1	GRIA1	GNG10	GRPR
CHAT	ATF4	GABRG1	CACNA1A	CACNA1S	HTR6
CACNA1B	CREB5	SLC6A13	CACNA1C	KCNN2	RXFP2
CACNA1D	GRIA2	PRKCB	CACNA1D	PRKACB	CRHR2
CACNA1F	GRIA3	SLC6A12	PPP3R1	CYP2J2	RXFP3
PRKACG	GRIA1	PRKCA	PRKACG	PRKACA	C3
GNG11	CACNA1A	SLC6A11	GNG11	KCNJ5	HTR4
GNG10	CACNA1C	GABRG3	GRIN2B	KCNJ6	LPAR1
CACNA1S	CACNA1B	GABRG2	PPP3R2	DUSP1	RXFP4
PRKACB	CACNA1D	GNB1	GNG10	HTR1F	GHRHR
PRKACA	SLC6A3	GNB3	GRIN2A	KCNJ9	C5
KCNJ6	PRKACG	GNB2	GLUL	HTR1D	GRIN2B
KCNJ12	GNG11	GNB5	PRKACB	HTR1E	HTR7
KCNJ14	GRIN2B	GNB4	SLC38A3	HTR1B	GRIN2A
KCNJ18	GNG10	GABARAP	GRIA4	BRAF	GALR3
GNG13	GRIN2A	SRC	PRKACA	HTR1A	GALR2
GNG12	PRKACB	CACNA1A	GNG13	GNG13	GALR1
PIK3CB	SCN1A	CACNA1C	GNG12	GNG12	PPY
PIK3CA	GRIA4	CACNA1B	SHANK1	GNAO1	CGA
GNAO1	PRKACA	CACNA1D	GNAO1	RAPGEF3	GABRA3
BCL2	KCNJ5	SLC6A1	SHANK3	GABRB3	EDN1
CAMK4	KCNJ6	TRAK2	SHANK2	GABRB2	GABRA2
ACHE	KCNJ9	CACNA1F	GRIK4	TPH2	EDN2
ITPR2	PPP2R5C	GNAI1	ITPR2	GABRB1	GABBR2
PIK3R5	PPP2R5B	GNAI2	GRIK5	TPH1	GABRA1
ITPR3	PPP2R5E	GNAI3	ITPR3	MAOB	EDN3
PIK3R3	PPP2R5D	GPHN	GRIK2	MAOA	GABBR1
PIK3R2	GNG13	PRKACG	GRIK3	ALOX15	NMB
ITPR1	GNG12	GNG11	PLD2	HTR2C	GABRA6
PIK3R6	PPP2R5A	GNG10	GRIK1	ITPR2	GABRA5
GNGT2	TH	CACNA1S	PLD1	ITPR3	FSHB
GNGT1	CALY	GLUL	ITPR1	HTR2A	GABRA4
SLC18A3	GNAO1	PRKACB	GNGT2	ALOX12	TACR3
FOS	GSK3B	GABRE	GRK2	HTR2B	TACR1
PLCB4	GSK3A	SLC38A3	PPP3CA	ITPR1	TACR2
KCNQ1	MAOB	GABRD	GNGT1	GNGT2	MC3R
KCNQ2	MAOA	PRKACA	PPP3CB	GNGT1	NMU
KCNQ3	ITPR2	SLC38A5	PPP3CC	CASP3	NPY4R2
KCNQ4	ITPR3		GRK3	TRPC1	FSHR
KCNQ5	ITPR1		TRPC1	SLC18A1	GNRH2
KRAS	GNGT2		DLGAP1	SLC18A2	GNRH1
PLCB2	PPP3CA		PLCB4	HTR3D	GABRB3
PLCB3	GNGT1		JMJD7-PLA2G4B	HTR3E	GABRB2
PLCB1	PPP3CB		PLCB2	HTR3B	GIPR
CAMK2D	PPP3CC		PLCB3	HTR3C	GABRB1
CAMK2A	DRD1		PLCB1	HTR3A	OPRD1
CAMK2B	DRD2		GNAI1	PLCB4	FPR2
PIK3CD	DRD3		GNAI2	JMJD7-PLA2G4B	GRIK4
GNAI1	SLC18A1		GRM2	KRAS	PRL
GNAI2	DRD4		GNAI3	PLCB2	ADM
GNAI3	SLC18A2		GRM1	PLCB3	ADRB1
PIK3CG	DRD5		GRM4	PLCB1	FPR1
GNA11	FOS		GRM3	DDC	GRIK5
MAPK3	PPP2R3A		GRM6	GNAI1	ADRB2
HRAS	PPP2R3C		GRM5	GNAI2	GRIK2
MAPK1	PPP2R3B		GRM8	PTGS1	PTH1R
FYN	PPP2CA		GRM7	GNAI3	ADRB3
CAMK2G	PLCB4		MAPK3	PTGS2	FPR3
KCNJ2	PPP2R2D		SLC17A6	MAPK3	GRIK3
KCNJ3	PPP2R2C		SLC17A7	HRAS	GRIK1
JAK2	PLCB2		MAPK1	MAPK1	MLN
KCNJ4	PLCB3		SLC17A8	KCNJ3	BRS3
					GABRR3
					MC2R
					GABRR2
					GABRR1
					CCKAR
					PENK
					GNRHR
					CTSG
					HCRT
					P2RY13
					P2RY14
					P2RY11
					GPR35
					GCGR
					F2
					SCTR
					P2RY10
					PTH2R
					SLURP2
					SLURP1
					GAL
					MAS1
					MC5R
					GHRH
					F2RL1
					F2RL2
					AVP
					GHRL
					F2RL3
					NPB
					PTH
					PTGER1
					GRP
					PTGER2
					PTAFR
					PTGER3
					PTGER4
					CHRND
					GLRA1
					CHRNE
					GLRA2
					GLRA3
					NPW
					UCN3
					UCN2
					CHRNG
					MC4R
					NPY
					CHRNA10
					TSPO
					GABRE
					GABRD
					CHRNB3
					CHRNB2
					GABRQ
					GABRP
					PRLR
					CHRNB4
					NPY1R
					TRPV1
					GCG
					AGT
					GPR50
					GRIN1
					MTNR1B
					MTNR1A
					IAPP
					LTB4R2
					APLNR
					UTS2
					CHRNB1
					CHRM3
					CHRNA2
					CHRM4
					CHRNA1
					CHRM1
					CHRNA4
					CHRM2
					CHRNA3
					CHRNA6
					CHRNA5
					CHRM5
					CHRNA7
					CHRNA9
					CYSLTR2
					CYSLTR1
					PRLH
					S1PR2
					ADORA3
					KISS1R
					S1PR1
					S1PR4
					ADORA1
					S1PR3
					S1PR5
					GHSR
					F2R
					ADRA2C
					ADRA2B
					ADRA2A
					RLN3
					NMUR2
					RLN1
					NMUR1
					RLN2
					GRIA2
					GRIA3
					CALCB
					CALCRL
					GRIA1
					C5AR1
					PMCH
					CALCA
					CSH2
					CSH1
					MCHR1
					GPR83
					MCHR2
					NTS
					CALCR
					LEPR
					GRIA4
					NPY5R
					HTR1F
					AVPR2
					HTR1D
					HTR1E
					HTR1B
					OPRM1
					SSTR1
					HTR1A
					SSTR2
					SSTR3
					SSTR4
					GH1
					PYY
					SSTR5
					GH2
					KISS1
					ADORA2B
					ADORA2A
					UCN
					LTB4R
					NPY4R
					GLP1R
					HTR2C
					TRH
					HTR2A
					ADRA1D
					HTR2B
					OPRL1
					OXT
					ADRA1B
					ADRA1A
					KNG1
					GHR
					P2RY8
					HRH2
					HRH1
					P2RY6
					HRH4
					TBXA2R
					HRH3
					NPBWR1
					P2RY4
					BDKRB1
					NPBWR2
					P2RY2
					P2RY1
					BDKRB2
					DRD1
					TAC4
					DRD2
					TAC3
					DRD3
					DRD4
					TAC1
					DRD5
					PRLHR
					LHCGR
					GRID1
					GRID2
					PTGIR
					GLP2R
					UTS2R
					GZMA
					GABRG1
					HCRTR1
					OPRK1
					GIP
					GABRG3
					GABRG2
					HCRTR2
					TSHR
					ADCYAP1
					P2RX7
					POMC
					CORT
					P2RX6
					P2RX5
					P2RX4
					GLRB
					P2RX3
					P2RX2
					UTS2B
					P2RX1
					CRH
					THRB
					THRA
					MLNR
					NPY2R
					PLG
					NR3C1
					GRM2
					GRM1
					GRM4
					EDNRA
					GRM3
					EDNRB
					GRM6
					GRM5
					GRM8
					CNR2
					GRM7
					CNR1
					INSL3
					INSL5
					TSHB

## Sheet: ST3
ID	PMID	Cell type	Groups
EGAS00001004936	PMID: 34661162	PBMC	ATL, Acs and healthy
GSE29312	PMID: 22291590	PBMC	Acs ,HAM/TSP and healthy
GSE38537		PBMC	Acs ,HAM/TSP and healthy
GSE233437	PMID: 37378292	PBMC	HAM/TSP and healthy
GSE33615	PMID: 22264793	PBMC	ATL and healthy

## Sheet: ST4
Asymptomatic													ATL patients													HAM/TSP
	x	y	cluster	Term	genes	pvalue	color	lw	la	size	fa			x	y	cluster	term	genes	pvalue	color	lw	la	size	fa			x	y	cluster	term	genes	pvalue	color	lw	la	size	fa
4159	10.8095	-1.24212	Cluster 10	Cytoplasmic Sequestering Of Transcription Factor (GO:0042994)	PSMD10 PKD1 IL10 FAF1 KEAP1 PKD2 NFKBIB TMSB4X NFKBIA G3BP2 SUFU NFKBIE MDFI NFKBIE EHD1 ICAM1 TNIP1 NFKB2 MSC TRAF1 SPHK1 TRIP10 ZC3H12A IL10 SOCS1 CD40 MMP19 PIM3 SLAMF7 TNF NFKBIA GRAMD1A IL1RN KEAP1 NFKBIB TICAM1 PLAUR IER3 TNFSF9 PFKFB3 IL27 NIPAL4 SRC RELB NINJ1 PLEKHM2 RNF19B SLAMF1 AMPD3 GPR84 ADORA2A CTSZ RAB7B CD274 TOM1 SLC2A6 BCL3 CCRL2 DOT1L KCNN4 DHX58 LILRB4 SLC15A3 MAN2B1 DUSP2 C1…	6.54887e-05	#aec7e8	0.5	0	12	2.59192		0	7.9442	-1.52113	Cluster 0	Phospholipase C-activating G Protein-Coupled Receptor Signaling Pathway (GO:0007200)	GPR17 TRHR GPR18 GPR55 HOMER1 TACR1 OPRM1 AGT MC3R LPAR6 AGTR1 VIP LTB4R CHRM1 OPRD1 CHRM2 DHX8 C3AR1 HTR2C GPR20 FPR2 GPR65 FPR1 PTH1R HTR2A HTR2B ADRA1D OPRL1 FPR3 ADRA1B P2RY8 P2RY6 CCKAR P2RY4 P2RY1 PLCE1 DRD1 DRD2 GPR157 DRD3 DRD5 LHCGR P2RY11 P2RY12 GPR35 F2R GPR33 OPRK1 GPR32 NMBR GPR4 ESR1 P2RY10 ADRA2A ANO1 GPR32P1 CCKBR GNAQ F2RL1 F2RL2 NMUR2 NMUR1 F2RL3 C5AR1 CALCA PTGER3 CX3CR1 C5AR2 …	0.142675	#440154	0.5	0	5	0.922826		0	7.9442	-1.52113	Cluster 0	Phospholipase C-activating G Protein-Coupled Receptor Signaling Pathway (GO:0007200)	GPR17 TRHR GPR18 GPR55 HOMER1 TACR1 OPRM1 AGT MC3R LPAR6 AGTR1 VIP LTB4R CHRM1 OPRD1 CHRM2 DHX8 C3AR1 HTR2C GPR20 FPR2 GPR65 FPR1 PTH1R HTR2A HTR2B ADRA1D OPRL1 FPR3 ADRA1B P2RY8 P2RY6 CCKAR P2RY4 P2RY1 PLCE1 DRD1 DRD2 GPR157 DRD3 DRD5 LHCGR P2RY11 P2RY12 GPR35 F2R GPR33 OPRK1 GPR32 NMBR GPR4 ESR1 P2RY10 ADRA2A ANO1 GPR32P1 CCKBR GNAQ F2RL1 F2RL2 NMUR2 NMUR1 F2RL3 C5AR1 CALCA PTGER3 CX3CR1 C5AR2 …	0.818143	#440154	0.5	0	5	0.543585
4160	10.183	-1.24859	Cluster 10	Myeloid Leukocyte Mediated Immunity (GO:0002444)	KMT2E IL6 ADAM17 PLA2G1B CARD9 IRAK4 SERPINB9 ADAM17 IRAK4 SERPINB9 IL6 KMT2E PLA2G1B CARD9 CELA3A PNLIPRP1 REG3G CELA3B CLPS PRSS3P2 GP2 CPA2 PIK3R5 IL10RA ZC3H12A PRSS1 CUZD1 AMY2A LILRB2 ADGRE2 SYCN CTRL CELA2A TNFAIP8 TLR2 PNLIP PRSS2 EMILIN2 KLK1 TMEM106A NFKBIZ IL1B NFKB1 TNF SOD2 CTRB1 RNF19B STX11 LILRB1 CCR5 SLC43A2 TNFRSF1B TRAF1 IRAK2 PILRA AOAH NCKAP1L PTGS2 LYN PIK3AP1 LCP2 GPR84 LAC…	9.73235e-10	#aec7e8	0.5	0	12	5.00589		1	8.84021	-1.64725	Cluster 0	Regulation Of Interleukin-17 Production (GO:0032660)	TGFB1 IL15 NCKAP1L PRNP RFTN1 SPHK1 NR1H4 OSM IL18 TYK2 FOXP3 IL2 SLC7A5 MYD88 IL6 IL23A TNFSF4 IFNG DDIT3 PRKCQ TLR4 IL21 PHB1 IL23R LY9 NOD2 VSIR IL36RN IL12B CCL1 SLAMF6 IL12A ZBTB7B JAK2 TNFRSF1B PIK3R5 HCK NOD2 IL10RA LILRB2 LAPTM5 THEMIS2 LYN TNIP1 FMNL1 PILRA LCP2 TAP1 HCLS1 MYO1G RASSF5 PPP1R18 STX11 ELF4 NCF2 CYTH1 WIPF1 RHOG LCP1 BCL3 HLA.E MYO9B GPSM3 NFKB2 TLR2 OSCAR ARAP1 TCIRG1 TGFB…	1.71725e-06	#440154	0.5	0	12	3.38258		1	8.84021	-1.64725	Cluster 0	Regulation Of Interleukin-17 Production (GO:0032660)	TGFB1 IL15 NCKAP1L PRNP RFTN1 SPHK1 NR1H4 OSM IL18 TYK2 FOXP3 IL2 SLC7A5 MYD88 IL6 IL23A TNFSF4 IFNG DDIT3 PRKCQ TLR4 IL21 PHB1 IL23R LY9 NOD2 VSIR IL36RN IL12B CCL1 SLAMF6 IL12A ZBTB7B JAK2 TNFRSF1B PIK3R5 HCK NOD2 IL10RA LILRB2 LAPTM5 THEMIS2 LYN TNIP1 FMNL1 PILRA LCP2 TAP1 HCLS1 MYO1G RASSF5 PPP1R18 STX11 ELF4 NCF2 CYTH1 WIPF1 RHOG LCP1 BCL3 HLA.E MYO9B GPSM3 NFKB2 TLR2 OSCAR ARAP1 TCIRG1 TGFB…	0.00785601	#440154	0.5	0	12	1.5524
4161	10.5992	-0.866953	Cluster 10	Negative Regulation Of Cell Communication (GO:0010648)	PTPN1 IL11 ADIPOQ BRAP SRMS MPIG6B HSP90AB1 HHIP IGFBP3 LIF OSM OPRM1 GLRA1 INPP5D IL1B NLRP12 KIF26A ERBB3 VHL UBASH3B FGF23 SOCS5 PTPN1 LIF PTGS2 OSM IL1B IER3 CXCL8 ZC3H12A IRAK2 SBNO2 PFKFB3 IL11 TRIM25 VASP BCL3 NFKB2 PLAUR HELZ2 HCAR2 RNF19B UBASH3B EHD1 MAPKAPK2 NFKB1 RAB35 ELF4 CEBPB KDM6B TNIP1 SOCS3 ACSL1 ATP13A3 AP5B1 PIM3 GPR84 ADGRE2 GRAMD1A TLN1 OGFR B4GALT5 TREM1 ISY1.RAB43 SH2B3 F…	0.000108024	#aec7e8	0.5	0	12	2.48324		2	8.80512	-1.61328	Cluster 0	Regulation Of Interleukin-13 Production (GO:0032656)	LEF1 IFNA2 TSLP SPHK2 IL18 HLA-E IFNL1 IL4 TNFRSF21 PRKCZ IRF4 TNFSF4 RARA LGALS9 LILRP2 LGALS9 RARA FBRS HLA.A TNFRSF14 OGFR SBNO2 RHOG PRKCD EHD1 CYTH1 TNIP1 STXBP2 BCL3 FMNL1 TAP1 NFKB2 CAMTA2 SH3BP1 TRIM25 EFHD2 LAPTM5 TGFB1 PTK2B UNC93B1 CSK MYO1G TCIRG1 STAT6 TYMP GRK2 ARAP1 PTPN6 PARP10 OAS2 GPSM3 TICAM1 LRCH4 RELB IRF5 WAS PPP1R18 MYO9B HLA.B PPP6R1 PLEKHO1 ARHGAP27 TNFRSF1B ELF4 TRAF1 PP…	0.0013683	#440154	0.5	0	12	1.93191		2	8.80512	-1.61328	Cluster 0	Regulation Of Interleukin-13 Production (GO:0032656)	LEF1 IFNA2 TSLP SPHK2 IL18 HLA-E IFNL1 IL4 TNFRSF21 PRKCZ IRF4 TNFSF4 RARA LGALS9 LILRP2 LGALS9 RARA FBRS HLA.A TNFRSF14 OGFR SBNO2 RHOG PRKCD EHD1 CYTH1 TNIP1 STXBP2 BCL3 FMNL1 TAP1 NFKB2 CAMTA2 SH3BP1 TRIM25 EFHD2 LAPTM5 TGFB1 PTK2B UNC93B1 CSK MYO1G TCIRG1 STAT6 TYMP GRK2 ARAP1 PTPN6 PARP10 OAS2 GPSM3 TICAM1 LRCH4 RELB IRF5 WAS PPP1R18 MYO9B HLA.B PPP6R1 PLEKHO1 ARHGAP27 TNFRSF1B ELF4 TRAF1 PP…	0.115168	#440154	0.5	0	5	0.969334
4162	10.7918	-1.1556	Cluster 10	Positive Regulation Of Heterotypic Cell-Cell Adhesion (GO:0034116)	FGB IL10 FGG GCNT2 TNF THY1 BMP7 IL1B LCK CEACAM6 FLOT1 SKAP1 FGA CD44 FGA FGG FGB TNF HPX IL1B IL10 ICAM1 TRAF1 EHD1 FGL1 ZC3H12A IL27 TNIP1 ADORA2A IL1RN SLAMF7 NINJ1 HP ITIH4 PLAUR SOCS3 MMP19 C8A RNF19B VTN CCL3 C8B PAH PFKFB3 C2 GPR84 OASL CFB MAT1A ACOD1 IRAK2 CCL3L3 CXCL3 MSC SERPINB2 DHX58 IER3 BCL3 MBL2 SRC ALB NFKB2 CD274 PLG AMPD3 C5 F2 NIPAL4 NFKB1 PTGS2 CCR5 SQRDL SOCS1 C9 ITIH1 GRAM…	0.00368145	#aec7e8	0.5	0	12	1.71699		3	8.3281	-1.23442	Cluster 0	Negative Regulation Of Myeloid Cell Differentiation (GO:0045638)	H4C9 HSPA9 LDB1 ZBTB16 CTR9 ZFP36L1 PRMT1 CIB1 PEX2 MAFB SKIC8 MEIS2 HOXA9 ZFP36 MEIS1 CDK6 MYB PTK2B LEO1 PF4 HOXB8 HOXA5 MYB HOXA9 HOXA5 H2AFY CDK6 P2RX1 SPN LDB1 BTK PPP6R1 NRROS ZFP36 GNA15 FERMT3 MEIS1 CAT HOXB8 RUNX1 PTK2B GRK2 UNC13D GOLGA8N AK2 RIN3 ATP2A3 MTA2 NUP210 POM121 NFE2 TMEM173 HNRNPUL1 MYO1G PTPN6 SF1 HNRNPL STXBP2 STAT5A SERPINB1 PARVG UBA7 FBRS TRABD RAB37 C15ORF39 SEPT6 FES …	0.000439458	#440154	0.5	0	12	2.17854		3	8.3281	-1.23442	Cluster 0	Negative Regulation Of Myeloid Cell Differentiation (GO:0045638)	H4C9 HSPA9 LDB1 ZBTB16 CTR9 ZFP36L1 PRMT1 CIB1 PEX2 MAFB SKIC8 MEIS2 HOXA9 ZFP36 MEIS1 CDK6 MYB PTK2B LEO1 PF4 HOXB8 HOXA5 MYB HOXA9 HOXA5 H2AFY CDK6 P2RX1 SPN LDB1 BTK PPP6R1 NRROS ZFP36 GNA15 FERMT3 MEIS1 CAT HOXB8 RUNX1 PTK2B GRK2 UNC13D GOLGA8N AK2 RIN3 ATP2A3 MTA2 NUP210 POM121 NFE2 TMEM173 HNRNPUL1 MYO1G PTPN6 SF1 HNRNPL STXBP2 STAT5A SERPINB1 PARVG UBA7 FBRS TRABD RAB37 C15ORF39 SEPT6 FES …	0.214191	#440154	0.5	0	5	0.8346
4163	10.7298	-0.555001	Cluster 10	Regulation Of Membrane Protein Ectodomain Proteolysis (GO:0051043)	GPLD1 IL10 ROCK1 FURIN NRDC SNX33 TNF TNFRSF1B ADRA2A IL1B IFNG PACSIN3 TIMP3 TIMP4 APOE ADAM9 TIMP1 TIMP2 SH3D19 SNX9 PTPN3 SNX9 LAMP1 TRIP10 PFKFB3 TNIP1 SPHK1 SPSB1 PLAUR MAPKAPK2 IER3 ICAM1 MMP14 MMP19 LRP1 TMBIM1 EHD1 MGAT1 TIMP2 PXDC1 CTSZ CEBPB METRNL NUCB1 ZC3H12A ARHGAP31 SRC TNF PLEKHM2 SNX33 AMPD3 FURIN BCL3 IL1B SDF4 CHMP4B SOCS3 TOM1 TICAM1 MSC GRN SBNO2 TNS3 SQRDL IL1RN GPR84 DRAM1 …	5.04534e-08	#aec7e8	0.5	0	12	4.14855		4	8.99121	-1.43337	Cluster 0	Regulation Of Interleukin-12 Production (GO:0032655)	IL10 IL16 LILRB1 ISL1 MAPK14 MAPK11 TLR2 FOXP1 IL23A IRF5 TNFSF4 IFNG TLR9 TLR8 TLR4 TLR3 SLAMF1 CD40 MEFV MAST2 HMGB1 MDK CLEC7A IRAK3 C1QBP RIPK2 CCR7 SYK LAPTM5 TIRAP SCIMP HLA-B HLA-G IL17A LTB CD47 CD40LG LILRP2 PLCB1 IL23R THBS1 HSPD1 IL12B PIBF1 PLCG2 CMKLR1 CCL19 JAK3 LGALS9 TIGIT HCK LILRB2 LYN TNFRSF1B TLR8 PILRA LAPTM5 NCF2 TLR2 THEMIS2 PIK3R5 HCLS1 LILRB3 CTSS LCP1 ITGAX CYTH4 SIGLEC9…	1.89344e-13	#440154	0.5	0	12	6.86137		4	8.99121	-1.43337	Cluster 0	Regulation Of Interleukin-12 Production (GO:0032655)	IL10 IL16 LILRB1 ISL1 MAPK14 MAPK11 TLR2 FOXP1 IL23A IRF5 TNFSF4 IFNG TLR9 TLR8 TLR4 TLR3 SLAMF1 CD40 MEFV MAST2 HMGB1 MDK CLEC7A IRAK3 C1QBP RIPK2 CCR7 SYK LAPTM5 TIRAP SCIMP HLA-B HLA-G IL17A LTB CD47 CD40LG LILRP2 PLCB1 IL23R THBS1 HSPD1 IL12B PIBF1 PLCG2 CMKLR1 CCL19 JAK3 LGALS9 TIGIT HCK LILRB2 LYN TNFRSF1B TLR8 PILRA LAPTM5 NCF2 TLR2 THEMIS2 PIK3R5 HCLS1 LILRB3 CTSS LCP1 ITGAX CYTH4 SIGLEC9…	0.171587	#440154	0.5	0	5	0.882757
4164	10.6834	-0.976756	Cluster 10	Regulation Of Heterotypic Cell-Cell Adhesion (GO:0034114)	IL1RN FGB MAP2K5 IL10 FGG GCNT2 TNF THY1 AGER KLF4 BMP7 IL1B LCK WNK1 APOA1 CEACAM6 FLOT2 FLOT1 MYADM MAPK7 SKAP1 FGA MBL2 CD44 FGG FGA FGB BCL3 EHD1 TNIP1 ICAM1 HPX TNF RNF19B ZC3H12A SOCS3 IL1RN PFKFB3 TRAF1 NINJ1 LILRB2 HP TICAM1 SBNO2 C8A MBL2 GRAMD1A OGFR C8B DHX58 FGL1 ITIH4 TNFRSF1B IL27 NFKB2 TNFAIP2 PLAUR ADORA2A IL1B MAT1A SLAMF7 C2 HELZ2 VTN MGAT1 MAPKAPK2 PAH MMP19 C4BPA IL10 STX11 AC…	0.000219014	#aec7e8	0.5	0	12	2.32976		5	9.04463	-1.49096	Cluster 0	Regulation Of Interleukin-10 Production (GO:0032653)	MMP8 SYK TSLP STAT3 XCL1 IL13 LILRB1 PDCD1LG2 ISG15 TYROBP LILRB4 FOXP3 IL4 TNFRSF21 PRKCZ FCGR2B IL6 IL23A IRF4 TNFSF4 F2RL1 TLR9 CD28 CD47 CD40LG TRIB2 LILRP2 CD46 TLR4 HLA-DRB1 CD274 IL23R HMGB1 NOD2 HSPD1 DLL1 VSIR INAVA PYCARD CLEC7A IL12B PIBF1 PLCG2 JAK3 LGALS9 TIGIT LILRB2 HCK TNFRSF1B PILRA NCF2 PIK3R5 NOD2 TAP1 LYN TLR8 TLR2 OSCAR LILRB3 IL10RA THEMIS2 HCLS1 LAPTM5 SIGLEC9 LITAF ITGAX R…	1.05519e-08	#440154	0.5	0	12	4.48833		5	9.04463	-1.49096	Cluster 0	Regulation Of Interleukin-10 Production (GO:0032653)	MMP8 SYK TSLP STAT3 XCL1 IL13 LILRB1 PDCD1LG2 ISG15 TYROBP LILRB4 FOXP3 IL4 TNFRSF21 PRKCZ FCGR2B IL6 IL23A IRF4 TNFSF4 F2RL1 TLR9 CD28 CD47 CD40LG TRIB2 LILRP2 CD46 TLR4 HLA-DRB1 CD274 IL23R HMGB1 NOD2 HSPD1 DLL1 VSIR INAVA PYCARD CLEC7A IL12B PIBF1 PLCG2 JAK3 LGALS9 TIGIT LILRB2 HCK TNFRSF1B PILRA NCF2 PIK3R5 NOD2 TAP1 LYN TLR8 TLR2 OSCAR LILRB3 IL10RA THEMIS2 HCLS1 LAPTM5 SIGLEC9 LITAF ITGAX R…	0.403802	#440154	0.5	0	5	0.696916
4165	10.373	-0.813343	Cluster 10	Regulation Of p38MAPK Cascade (GO:1900744)	MAP3K4 DUSP1 GADD45B GADD45A SPHK1 MINK1 GADD45G PRMT1 SORD GDF6 MFHAS1 VEGFA DAB2IP PJA2 IL1B BMP4 DLG1 CYLD BMP2 PER1 LEP HAND2 ULK4 RELL1 RELL2 NCF1 EZR PHLPP1 SPI1 PTPN22 TREM2 DUSP10 RASGRP1 ZC3H12A STK39 LGALS9 SASH1 TNIP1 ZC3H12A SBNO2 MYO9B NFKB2 EHD1 BCL3 PLEKHM2 MAPKAPK2 PFKFB3 OGFR RELB MAN2B1 MGAT1 ICAM1 RNF19B TICAM1 SIRPA SLC15A3 TNFRSF1B RAPGEF1 CHMP4B PIM3 TOM1 CEBPB CTSZ NINJ1 GA…	3.13195e-05	#aec7e8	0.5	0	12	2.75209		6	8.71945	-1.15478	Cluster 0	Negative Regulation Of Myeloid Cell Apoptotic Process (GO:0033033)	EPO SELENOS NOD2 IRF7 MAEA NOD2 IRF7 HCK LILRB2 LILRB3 TNFRSF1B MAEA MX2 ADAM8 THEMIS2 NCF1 NADK ARRB2 FMNL1 NCF2 NCF1B OSCAR SPI1 PILRA GMIP LYN VASP WAS PRKCD TCIRG1 ARAP1 HLA.B SBNO2 TLR2 TRIM25 HELZ2 TYMP PIK3R5 ITGAX AP5B1 FGR LITAF NFAM1 UNC93B1 SECTM1 NCF1C EFHD2 PARP10 APOBR TAP1 BCL3 OGFR HLA.A SMAP2 ARHGAP27 C10ORF54 GPSM3 LILRA6 ELF4 CSF2RB STX11 MYO1F ELL TNIP1 FPR1 CFP RNF19B LRRC25 …	2.8881e-05	#440154	0.5	0	12	2.76969		6	8.71945	-1.15478	Cluster 0	Negative Regulation Of Myeloid Cell Apoptotic Process (GO:0033033)	EPO SELENOS NOD2 IRF7 MAEA NOD2 IRF7 HCK LILRB2 LILRB3 TNFRSF1B MAEA MX2 ADAM8 THEMIS2 NCF1 NADK ARRB2 FMNL1 NCF2 NCF1B OSCAR SPI1 PILRA GMIP LYN VASP WAS PRKCD TCIRG1 ARAP1 HLA.B SBNO2 TLR2 TRIM25 HELZ2 TYMP PIK3R5 ITGAX AP5B1 FGR LITAF NFAM1 UNC93B1 SECTM1 NCF1C EFHD2 PARP10 APOBR TAP1 BCL3 OGFR HLA.A SMAP2 ARHGAP27 C10ORF54 GPSM3 LILRA6 ELF4 CSF2RB STX11 MYO1F ELL TNIP1 FPR1 CFP RNF19B LRRC25 …	0.189843	#440154	0.5	0	5	0.860802
4166	10.8438	-1.1537	Cluster 10	Regulation Of Vascular Wound Healing (GO:0061043)	FOXC2 XBP1 SERPINE1 SMOC2 SLC12A2 TNFAIP3 TNF TNFAIP3 TNF SERPINE1 ZC3H12A FOXC2 XBP1 SMOC2 SLC12A2 IER3 SPSB1 SOCS3 ICAM1 TNIP1 TRAF1 MAPKAPK2 PDGFB PTGS2 NFKB2 GADD45B PFKFB3 EHD1 TRIP10 PIM3 DUSP5 CLCF1 NFKBIA IL1B NFKB1 BCL3 IL6 CSRNP1 PLAUR TICAM1 ATP8B1 RNF19B TPM4 SLAMF7 SPHK1 PTX3 EHD4 CSF3 MSC LTBP2 MMP19 FOSL2 IL27 CXCL3 SERPINB2 PTPN1 NFKBIZ RHOC CD274 ARID5A WDR1 IRAK2 SEC61A1 ARHGAP3…	0.00314091	#aec7e8	0.5	0	12	1.75147		7	8.31264	-0.77514	Cluster 0	Regulation Of Interleukin-1 Production (GO:0032652)	ORM2 TMED10 IL10 ORM1 MEFV F2R HMGB1 FOXP1 NLRP12 CEACAM1 SIRPA SAA1 CCR7 IGHD GAS6 TLR4 AQP9 LRG1 TLR4 ACSL1 NCF2 HCK TLR8 LILRB3 MEFV LITAF CYP4F3 LILRB2 IL6R PILRA TLR2 TNFRSF1B ITGAX CTSS C5AR1 ORM1 LILRA6 NFAM1 CSF2RB FPR2 PTAFR SIGLEC9 ADGRE2 LYN ORM2 THEMIS2 CHST15 TNFAIP2 OSCAR GLT1D1 RNF19B NADK APOBR IL17RA SIRPA FPR1 MYO1F LRRC25 RNF149 TNFRSF10C PIK3R5 NAMPT VNN2 NLRP12 CEACAM3 NINJ1 …	8.71401e-09	#440154	0.5	0	12	4.52989		7	8.31264	-0.77514	Cluster 0	Regulation Of Interleukin-1 Production (GO:0032652)	ORM2 TMED10 IL10 ORM1 MEFV F2R HMGB1 FOXP1 NLRP12 CEACAM1 SIRPA SAA1 CCR7 IGHD GAS6 TLR4 AQP9 LRG1 TLR4 ACSL1 NCF2 HCK TLR8 LILRB3 MEFV LITAF CYP4F3 LILRB2 IL6R PILRA TLR2 TNFRSF1B ITGAX CTSS C5AR1 ORM1 LILRA6 NFAM1 CSF2RB FPR2 PTAFR SIGLEC9 ADGRE2 LYN ORM2 THEMIS2 CHST15 TNFAIP2 OSCAR GLT1D1 RNF19B NADK APOBR IL17RA SIRPA FPR1 MYO1F LRRC25 RNF149 TNFRSF10C PIK3R5 NAMPT VNN2 NLRP12 CEACAM3 NINJ1 …	0.0267836	#440154	0.5	0	12	1.28607
4167	10.5384	-1.21334	Cluster 10	Positive Regulation Of Receptor Signaling Pathway Via STAT (GO:1904894)	TGFB1 IL10 F2R TSLP IL10RB IL10RA CSHL1 F2 TYK2 GH1 GH2 IL6 KIT CENPJ LEP OCIAD2 OCIAD1 CRLF2 CRLF3 IL7R NOTCH1 IL26 CAMK2A CSH2 CSH1 PRL TNF IFNL1 GHR ERBB4 EP300 CCL5 MGAT5 CYP1B1 HES1 HES5 JAK2 IL10RA RNF19B TRAF1 LILRB2 PIK3R5 TNFRSF1B TNIP1 SLC43A2 EHD1 TNF SLAMF7 IL27 TNFAIP2 IL10 DHX58 CSH1 ICAM1 CSHL1 CSH2 PSG3 CCR5 IL1RN ZC3H12A ADORA2A BCL3 NINJ1 PILRA PSG9 PSG11 AMPD3 PFKFB3 PSG1 GH2 C…	0.0126763	#aec7e8	0.5	0	12	1.4485		8	9.09227	-1.15803	Cluster 0	Regulation Of Interleukin-1 Beta Production (GO:0032651)	GSDMD FFAR1 NLRP2B WNT5A PYHIN1 CARD8 AZU1 TYROBP LILRB4 ISL1 FOXP1 IL6 ELF4 LCP1 APOA1 IFNG PYDC1 PYDC2 TLR8 TRIM16 TLR6 NAIP TLR4 TMEM106A APP MEFV TNFAIP3 NOD2 NLRC4 TNF CX3CL1 HSPB1 INAVA PYCARD CASP8 PANX1 NLRP7 CLEC7A STMP1 IFI16 CARD17P NLRP3 RIPK2 NLRP1 NLRP2 CASP1 CCR7 CD36 GHSR GBP5 CD33 EGR1 F2R FZD5 SERPINB1 STAT3 IGF1 IL17A P2RX7 MYD88 AIM2 NLRP12 CPTP F2RL1 CARD18 MNDA CARD16 GHRL L…	3.83023e-07	#440154	0.5	0	12	3.70839		8	9.09227	-1.15803	Cluster 0	Regulation Of Interleukin-1 Beta Production (GO:0032651)	GSDMD FFAR1 NLRP2B WNT5A PYHIN1 CARD8 AZU1 TYROBP LILRB4 ISL1 FOXP1 IL6 ELF4 LCP1 APOA1 IFNG PYDC1 PYDC2 TLR8 TRIM16 TLR6 NAIP TLR4 TMEM106A APP MEFV TNFAIP3 NOD2 NLRC4 TNF CX3CL1 HSPB1 INAVA PYCARD CASP8 PANX1 NLRP7 CLEC7A STMP1 IFI16 CARD17P NLRP3 RIPK2 NLRP1 NLRP2 CASP1 CCR7 CD36 GHSR GBP5 CD33 EGR1 F2R FZD5 SERPINB1 STAT3 IGF1 IL17A P2RX7 MYD88 AIM2 NLRP12 CPTP F2RL1 CARD18 MNDA CARD16 GHRL L…	0.00870252	#440154	0.5	0	12	1.53018
4168	10.8374	-1.18963	Cluster 10	Positive Regulation Of Execution Phase Of Apoptosis (GO:1900119)	PTGIS DYNLL1 ZC3H12A CEL TP53BP2 SIRT2 TP53 TP53BP2 ZC3H12A CEL SIRT2 PTGIS DYNLL1 TP53 AMY2A ICAM1 TICAM1 PLAUR CELA2A TNF SPSB1 GP2 CELA3B CUZD1 PFKFB3 IER3 MMP19 CLPS TNIP1 KLK1 PRSS3P2 GRAMD1A PNLIP CLCF1 PNLIPRP1 IL1RN CELA2B IRAK2 CELA3A TRIP10 MSC EHD1 GPR84 IL1B SOCS3 NFKB2 TRAF1 PLA2G1B NINJ1 NIPAL4 SLAMF7 CPA1 SPHK1 PIM3 IL10 IL27 ACOD1 CXCL3 BCL3 RELB SOCS1 IL6 RNF19B DRAM1 PRSS2 NFKB1…	0.000269307	#aec7e8	0.5	0	12	2.28488		9	9.56204	-1.84935	Cluster 0	Regulation Of Interferon-Beta Production (GO:0032648)	HSP90AA1 LILRB1 PTPN11 OAS1 TLR2 IRF1 POLR3A POLR3B POLR3C OAS2 IRF5 POLR3D OAS3 POLR3F IRF3 POLR3G TLR9 REL TLR8 IRF7 TLR7 TRIM56 TLR4 TLR3 PTPRS DDX3X DHX9 NLRC3 RELB PYCARD YY1 RIPK2 MORC3 TOMM70 TIRAP TRAF3 ISG15 STING1 PPM1B MAVS CACTIN RIGI IFIH1 RNF135 TBK1 RNF216 SIRPA RIOK3 FLOT1 TRIM65 MX2 LYN HCK LILRB2 TRIM25 OAS2 TNFRSF1B NCF2 TAP1 PIK3R5 TLR2 THEMIS2 HELZ2 NOD2 OAS1 FMNL1 TLR8 ARAP1…	4.16682e-09	#440154	0.5	0	12	4.6901		9	9.56204	-1.84935	Cluster 0	Regulation Of Interferon-Beta Production (GO:0032648)	HSP90AA1 LILRB1 PTPN11 OAS1 TLR2 IRF1 POLR3A POLR3B POLR3C OAS2 IRF5 POLR3D OAS3 POLR3F IRF3 POLR3G TLR9 REL TLR8 IRF7 TLR7 TRIM56 TLR4 TLR3 PTPRS DDX3X DHX9 NLRC3 RELB PYCARD YY1 RIPK2 MORC3 TOMM70 TIRAP TRAF3 ISG15 STING1 PPM1B MAVS CACTIN RIGI IFIH1 RNF135 TBK1 RNF216 SIRPA RIOK3 FLOT1 TRIM65 MX2 LYN HCK LILRB2 TRIM25 OAS2 TNFRSF1B NCF2 TAP1 PIK3R5 TLR2 THEMIS2 HELZ2 NOD2 OAS1 FMNL1 TLR8 ARAP1…	0.0486241	#440154	0.5	0	12	1.15657
4169	10.1075	-1.41073	Cluster 10	Regulation Of Mitochondrial Depolarization (GO:0051900)	MLLT11 SRC LRRK2 KDR BCL2 FZD9 MYOC IFI6 RACK1 DCN SRC IFI6 TNIP1 HELZ2 BCL2 MYOC MX1 DCN FZD9 LRRK2 KDR NFKB2 OGFR PARP14 ACSL1 TLR8 SLC15A3 OAS2 TRIM25 MX2 RAPGEF1 IGF2R SLC4A11 TRAF1 MYO9B MSC RAB35 GRAMD1A DDX60L TLR2 EHD1 LYN NFKBIE IFIT3 NCF2 SAMD9 SBNO2 GRINA GBP2 OAS1 PLEKHO2 TAP1 LILRB2 RNF19B ICAM1 SMCHD1 PIM3 UNC93B1 MAPKAPK2 MAN2B1 TNFRSF1B CCR5 TLR1 COL4A3 CD93 OAS3 PIK3R5 IER3 CMPK2…	6.57642e-10	#aec7e8	0.5	0	12	5.09101		10	9.51753	-1.84732	Cluster 0	Regulation Of Interferon-Alpha Production (GO:0032647)	IL10 NMB STAT1 NMBR MAVS IRF5 IRF3 TLR9 TLR8 IRF7 TLR7 TLR4 RIGI TLR3 PTPRS DDX3X DHX9 HSPD1 LILRA4 NLRC3 IFIH1 TBK1 DHX36 RIPK2 HAVCR2 SETD2 LYN MX2 OAS2 LILRB2 TRIM25 HCK NCF2 TNFRSF1B TLR8 LCP1 PIK3R5 TAP1 IRF7 IL10RA HELZ2 IRF5 IFIH1 HCLS1 THEMIS2 NOD2 LAPTM5 MYO1G MX1 DOCK2 CTSS PARP14 DHX58 NCF1C RNF19B ARHGAP30 TLR2 TRAF1 CYTH1 ITGAX MYO9B FMNL1 PILRA NFKB2 LILRB3 PTPN6 NCF1 GMIP NCKAP1L C…	5.83206e-08	#440154	0.5	0	12	4.11709		10	9.51753	-1.84732	Cluster 0	Regulation Of Interferon-Alpha Production (GO:0032647)	IL10 NMB STAT1 NMBR MAVS IRF5 IRF3 TLR9 TLR8 IRF7 TLR7 TLR4 RIGI TLR3 PTPRS DDX3X DHX9 HSPD1 LILRA4 NLRC3 IFIH1 TBK1 DHX36 RIPK2 HAVCR2 SETD2 LYN MX2 OAS2 LILRB2 TRIM25 HCK NCF2 TNFRSF1B TLR8 LCP1 PIK3R5 TAP1 IRF7 IL10RA HELZ2 IRF5 IFIH1 HCLS1 THEMIS2 NOD2 LAPTM5 MYO1G MX1 DOCK2 CTSS PARP14 DHX58 NCF1C RNF19B ARHGAP30 TLR2 TRAF1 CYTH1 ITGAX MYO9B FMNL1 PILRA NFKB2 LILRB3 PTPN6 NCF1 GMIP NCKAP1L C…	0.0026962	#440154	0.5	0	12	1.78462
4170	9.67311	-0.681809	Cluster 10	Positive Regulation Of Extrinsic Apoptotic Signaling Pathway (GO:2001238)	WWOX TNFRSF12A G0S2 CAV1 INHBA TRAF2 PML CYLD LTBR AGTR2 LTB TLR6 TLR4 RET BCL10 HTRA2 THBS1 TNF SFRP1 DEDD2 PYCARD PAK2 HYAL2 PPP2R1B GPER1 TNFSF12 FADD PMAIP1 TNFSF10 RIPK1 BID EHD1 MGAT1 TNIP1 VASP PPP1R18 SBNO2 TRIM25 BCL3 ELF4 LRP10 RNF19B LILRB2 HCK GNAI2 TNFRSF1B PML RELB TLR2 LITAF NINJ1 TNFRSF1A PLAUR NCF2 S100A11 TLR4 GRN TNFAIP2 RIPK1 MVP SQRDL CEBPB TICAM1 NFKB2 ACSL1 PILRA OGFR HELZ2…	2.89919e-10	#aec7e8	0.5	0	12	5.26886		11	8.42982	0.0227045	Cluster 0	Positive Regulation Of Autophagosome Maturation (GO:1901098)	UVRAG FYCO1 CALCOCO2 TOM1 SMCR8 IRGM TOM1 FYCO1 SMCR8 CALCOCO2 EHBP1L1 UVRAG MAPKAPK2 CCDC69 MYO9B TMEM127 MEF2D ARAP1 WDTC1 OGDH PIK3R5 KLF13 IL10RA MAN2B1 TNFRSF1B RAPGEF1 FMNL1 PPTC7 CYTH1 IRGM ANXA11 STAT6 AP5B1 MYO18A RIN3 MGAT1 FBRS TFEB FOSL2 TEP1 ACSL1 EMILIN2 ELF4 HCK TCIRG1 THEMIS2 ELL TNIP1 STX11 SBNO2 KDM2A IL17RA RELT HCLS1 OPTN DOCK2 TXLNB PERM1 PLEKHO2 DNASE1L1 KLHL38 NCKAP1L TRAPP…	0.00046289	#440154	0.5	0	12	2.16726		11	8.42982	0.0227045	Cluster 0	Positive Regulation Of Autophagosome Maturation (GO:1901098)	UVRAG FYCO1 CALCOCO2 TOM1 SMCR8 IRGM TOM1 FYCO1 SMCR8 CALCOCO2 EHBP1L1 UVRAG MAPKAPK2 CCDC69 MYO9B TMEM127 MEF2D ARAP1 WDTC1 OGDH PIK3R5 KLF13 IL10RA MAN2B1 TNFRSF1B RAPGEF1 FMNL1 PPTC7 CYTH1 IRGM ANXA11 STAT6 AP5B1 MYO18A RIN3 MGAT1 FBRS TFEB FOSL2 TEP1 ACSL1 EMILIN2 ELF4 HCK TCIRG1 THEMIS2 ELL TNIP1 STX11 SBNO2 KDM2A IL17RA RELT HCLS1 OPTN DOCK2 TXLNB PERM1 PLEKHO2 DNASE1L1 KLHL38 NCKAP1L TRAPP…	0.516362	#440154	0.5	0	5	0.643523
4171	10.4708	-0.563227	Cluster 10	Positive Regulation Of Fat Cell Differentiation (GO:0045600)	LMO3 RARRES2 ZBTB16 SIRT6 SOX13 BMP7 SFRP2 BMP2 FNDC5 LCP1 ID2 WDFY2 CARM1 VSTM2A HNRNPU ZFP36L1 CREBL2 LRP5 METRNL MEDAG SFRP1 FRZB ZFP36 NOCT AKT1 TFE3 RREB1 ADIG XBP1 GDF3 TMEM64 ASXL2 CREB1 PPARG PPARD SYAP1 CEBPB CDS1 NAPEPLD SIX1 ADIRF INS PTGS2 ZC3H12A SULT1E1 PIM1 CMKLR1 ZBTB7B TRPM4 ZNF385A SBNO2 MAPKAPK2 CEBPB BCL3 MGAT1 GRINA TMEM127 TFE3 METRNL OGFR ZC3H12A GAA RXRA GAK AKT1 PPARD FOS…	0.0144591	#aec7e8	0.5	0	12	1.41993		12	9.3804	-1.36626	Cluster 0	Endolysosomal Toll-Like Receptor Signaling Pathway (GO:0140894)	SCARA3 UNC93B1 RFTN1 IRAK4 SCIMP OAS1 MYD88 TNIP2 IRAK1 EPG5 TLR8 TLR7 PIK3AP1 HCK LYN UNC93B1 NCF2 PIK3AP1 TLR8 LILRB2 LAPTM5 THEMIS2 TNFRSF1B ARAP1 MYO9B MX2 CTSS PRKCD LCP1 OAS1 TAP1 TRIM25 NOD2 LGALS9 ELF4 PILRA MYD88 PIK3R5 LILRB3 VASP TLR2 PPP1R18 NCF1 HCLS1 OAS2 TCIRG1 ITGAX GMIP STAT6 TNIP1 FGR ARHGAP30 MYO1G OSCAR NADK HLA.B MGAT1 HLA.A SLC15A3 FMNL1 LILRB1 SPI1 PTPN6 NCKAP1L DOCK2 CSF2R…	1.55066e-06	#440154	0.5	0	12	3.40474		12	9.3804	-1.36626	Cluster 0	Endolysosomal Toll-Like Receptor Signaling Pathway (GO:0140894)	SCARA3 UNC93B1 RFTN1 IRAK4 SCIMP OAS1 MYD88 TNIP2 IRAK1 EPG5 TLR8 TLR7 PIK3AP1 HCK LYN UNC93B1 NCF2 PIK3AP1 TLR8 LILRB2 LAPTM5 THEMIS2 TNFRSF1B ARAP1 MYO9B MX2 CTSS PRKCD LCP1 OAS1 TAP1 TRIM25 NOD2 LGALS9 ELF4 PILRA MYD88 PIK3R5 LILRB3 VASP TLR2 PPP1R18 NCF1 HCLS1 OAS2 TCIRG1 ITGAX GMIP STAT6 TNIP1 FGR ARHGAP30 MYO1G OSCAR NADK HLA.B MGAT1 HLA.A SLC15A3 FMNL1 LILRB1 SPI1 PTPN6 NCKAP1L DOCK2 CSF2R…	0.171587	#440154	0.5	0	5	0.882757
4172	10.817	-1.10291	Cluster 10	Positive Regulation Of Monooxygenase Activity (GO:0032770)	GCH1 S100A1 TERF2 DHFR IL1B POR NOS1AP PIK3CB GDNF IFNG FCER2 NPR3 NUS1P3 PARK7 TNF HTR2B HIF1A INS CYP27B1 CDH3 TERT AKT1 APOE ATP7A SCARB1 FGF23 TNF CD274 IL1B TNIP1 SRC MSC ICAM1 TRAF1 ZC3H12A IER3 SPHK1 PFKFB3 PLAUR NFKB2 CYP27B1 IL1RN RNF19B GPR84 TICAM1 MMP19 TRIP10 CXCL3 PTGS2 SLAMF7 PIM3 IRAK2 LAMP1 CD40 IL27 C17ORF96 GRAMD1A SLC2A6 GCH1 NFKB1 SCARB1 SERPINB2 GRINA ABTB2 TNFSF9 IL10 PTPN1…	4.13639e-05	#aec7e8	0.5	0	12	2.69169		13	8.33675	-0.886667	Cluster 0	Regulation Of Interleukin-18 Production (GO:0032661)	TLR2 NLRP9 CD84 IL10 NLRP12 DHX9 TLR9 GBP5 TLR2 NCF2 HCK TLR8 LILRB3 PILRA LILRB2 ITGAX LYN TNFRSF1B C5AR1 PIK3R5 CTSS THEMIS2 SIGLEC9 ADGRE2 CSF2RB LILRA6 MYO1F SPI1 NCF1B NFAM1 OSCAR ARRB2 CYTH4 LITAF IL17RA FPR2 NOD2 HCLS1 FMNL1 AOAH APOBR PTAFR AQP9 NCF1 SMAP2 LRRC25 FGR TLR4 CCR1 WAS CLEC4E FPR1 CLEC7A MX2 LCP1 GBP2 STX11 GMIP ADAM8 LAPTM5 NADK TNFRSF10C EVI2B MEFV MXD1 TLR1 ARHGAP30 ARAP1 A…	1.19233e-10	#440154	0.5	0	12	5.4618		13	8.33675	-0.886667	Cluster 0	Regulation Of Interleukin-18 Production (GO:0032661)	TLR2 NLRP9 CD84 IL10 NLRP12 DHX9 TLR9 GBP5 TLR2 NCF2 HCK TLR8 LILRB3 PILRA LILRB2 ITGAX LYN TNFRSF1B C5AR1 PIK3R5 CTSS THEMIS2 SIGLEC9 ADGRE2 CSF2RB LILRA6 MYO1F SPI1 NCF1B NFAM1 OSCAR ARRB2 CYTH4 LITAF IL17RA FPR2 NOD2 HCLS1 FMNL1 AOAH APOBR PTAFR AQP9 NCF1 SMAP2 LRRC25 FGR TLR4 CCR1 WAS CLEC4E FPR1 CLEC7A MX2 LCP1 GBP2 STX11 GMIP ADAM8 LAPTM5 NADK TNFRSF10C EVI2B MEFV MXD1 TLR1 ARHGAP30 ARAP1 A…	0.0034105	#440154	0.5	0	12	1.73359
4173	10.8204	-1.21513	Cluster 10	Regulation Of Glial Cell Proliferation (GO:0060251)	PRKCH IL1B NOTCH1 PRKCI IL6 TNF HES1 SOX11 TNF IL1B IL6 ZC3H12A CXCL3 TRAF1 SERPINB2 PTGS2 ICAM1 ADORA2A NFKB1 RNF19B PFKFB3 SOCS3 CXCL8 GPR84 IER3 IL1A IRAK2 PLAUR EHD1 IL27 SOD2 ACOD1 IL10 SLAMF7 TNIP1 NFKB2 IL1RN AMPD3 MMP19 CCL3L3 GRAMD1A GPR132 CCRL2 CD274 TNIP3 TNFAIP2 OASL NIPAL4 CXCL2 SLC2A6 CCR5 SRC MSC NINJ1 DHX58 SOCS1 CCL3 PIK3R5 PIM3 LILRB2 BCL3 HELZ2 IL10RA CSF3 TNFRSF1B TICAM1 SPHK…	3.9298e-08	#aec7e8	0.5	0	12	4.20282		14	8.17303	-1.48927	Cluster 0	Regulation Of Inositol Phosphate Biosynthetic Process (GO:0010919)	PTH PLEK PTK2B PTH1R SNCA CD244 PTK2B PLEK CD244 DOCK2 WIPF1 THEMIS2 HCLS1 LYN DOCK8 PTPN6 LCP1 HLA.E ARHGAP30 NCKAP1L SNCA NCF2 AOAH MYO1G FGR CYTH1 PLCB2 ARAP1 FMNL1 LAPTM5 FERMT3 CTSS C11ORF21 PTPRC HCK SYK BTK GPSM3 GRK2 TBXAS1 KLF13 STX11 ARRB2 MYO1F PARVG WAS PRKCB SORL1 IL17RA CFP ARHGAP45 KCNAB2 CCDC88B IRAK3 PIK3CD C10ORF54 SMAP2 TLR1 CD53 GMIP STK10 AKNA SSH2 DOK3 NCOA4 TLR8 RASSF2 NOD2…	9.77478e-07	#440154	0.5	0	12	3.50495		14	8.17303	-1.48927	Cluster 0	Regulation Of Inositol Phosphate Biosynthetic Process (GO:0010919)	PTH PLEK PTK2B PTH1R SNCA CD244 PTK2B PLEK CD244 DOCK2 WIPF1 THEMIS2 HCLS1 LYN DOCK8 PTPN6 LCP1 HLA.E ARHGAP30 NCKAP1L SNCA NCF2 AOAH MYO1G FGR CYTH1 PLCB2 ARAP1 FMNL1 LAPTM5 FERMT3 CTSS C11ORF21 PTPRC HCK SYK BTK GPSM3 GRK2 TBXAS1 KLF13 STX11 ARRB2 MYO1F PARVG WAS PRKCB SORL1 IL17RA CFP ARHGAP45 KCNAB2 CCDC88B IRAK3 PIK3CD C10ORF54 SMAP2 TLR1 CD53 GMIP STK10 AKNA SSH2 DOK3 NCOA4 TLR8 RASSF2 NOD2…	0.0154774	#440154	0.5	0	12	1.40515
4174	10.6987	-1.26181	Cluster 10	Positive Regulation Of Smooth Muscle Cell Apoptotic Process (GO:0034393)	IFNG MFN2 PPARG E2F3 PDCD4 IL12B IL12A SOD2 CD274 IL12B SOD2 IL12A RNF19B TNIP1 E2F3 IFNG PPARG TRAF1 TNFAIP2 CSF2 NFKB1 ZC3H12A MFN2 PTGS2 SLAMF7 USP12 IL15RA GBP1 NFKB2 ADORA2A ACSL1 IRAK2 PDCD4 CCRL2 IL1RN CYP27B1 NINJ1 SQRDL TRIP10 MAPKAPK2 ICAM1 AMPD3 PFKFB3 CD80 PTPN1 GPR137B EHD1 ACOD1 GRAMD1A GBP2 PIK3AP1 CD83 TRIM25 ETV3 N4BP1 TNF CD40 IL23A SOCS3 CCR5 TICAM1 IDO1 CMPK2 LILRB2 PIM3 DHX58…	1.58796e-10	#aec7e8	0.5	0	12	5.39958		15	8.71273	-1.02346	Cluster 0	Regulation Of Inflammatory Response To Antigenic Stimulus (GO:0002861)	RHBDF2 YES1 LYN SRC SYK PLA2G2D FURIN KARS1 PLK2 TREM2 HCK MAPK14 FGR MKRN2 PLCG1 FYN HLA-DRB1 HCK ARAP1 NCF2 ITGAX SPI1 TNFRSF1B FGR LYN VASP PIK3R5 SIGLEC9 ARRB2 LILRB3 LILRB2 THEMIS2 FMNL1 MYO9B PILRA PLEKHO2 OSCAR TLR2 EFHD2 TCIRG1 GMIP PLCB2 CTSS APOBR TLR8 LAPTM5 GNAI2 NADK MYO1F PPP1R18 IL17RA LRRC25 CYTH4 PRKCD MAN2B1 ARHGAP30 WAS CSF2RB ITGAM NFAM1 HK3 RPS6KA1 ADAM8 AP5B1 SLC15A3 CCR1 C5…	6.81201e-08	#440154	0.5	0	12	4.08336		15	8.71273	-1.02346	Cluster 0	Regulation Of Inflammatory Response To Antigenic Stimulus (GO:0002861)	RHBDF2 YES1 LYN SRC SYK PLA2G2D FURIN KARS1 PLK2 TREM2 HCK MAPK14 FGR MKRN2 PLCG1 FYN HLA-DRB1 HCK ARAP1 NCF2 ITGAX SPI1 TNFRSF1B FGR LYN VASP PIK3R5 SIGLEC9 ARRB2 LILRB3 LILRB2 THEMIS2 FMNL1 MYO9B PILRA PLEKHO2 OSCAR TLR2 EFHD2 TCIRG1 GMIP PLCB2 CTSS APOBR TLR8 LAPTM5 GNAI2 NADK MYO1F PPP1R18 IL17RA LRRC25 CYTH4 PRKCD MAN2B1 ARHGAP30 WAS CSF2RB ITGAM NFAM1 HK3 RPS6KA1 ADAM8 AP5B1 SLC15A3 CCR1 C5…	0.291469	#440154	0.5	0	5	0.767704
4175	10.7636	-0.491438	Cluster 10	Positive Regulation Of Smooth Muscle Cell Migration (GO:0014911)	DOCK7 PDGFRB DOCK5 DOCK4 IGFBP5 PDGFB IGF1 AIF1 VTN NR4A3 MDK NELL1 FGF9 CCL5 CCN4 S100A11 DOCK4 PDGFB MMP19 PFKFB3 ICAM1 NINJ1 C1QC FCGRT PLAUR SPSB1 LRP1 LILRB4 DRAM1 SPHK1 CD68 STAB1 SIGLEC1 PXDC1 NR4A3 CTSZ C1QA PDGFRB LILRB5 SOCS3 FTL CTSB SOD2 GRN SLC15A3 ENG FOLR2 AMPD3 CCR5 METRNL BCL3 C1S RAB7B IGF1 RNF19B PILRA GPR84 S100A11 CEBPB FAM20C RNASE1 IL1RN ARHGAP31 VSIG4 TNFAIP2 CSF1R IGFBP5 …	3.78905e-09	#aec7e8	0.5	0	12	4.71073		16	9.12297	-1.31245	Cluster 0	Regulation Of Inflammatory Response (GO:0050727)	IL1R1 CMA1 ACOD1 ISL1 MAPK13 FNDC4 IL23A NINJ1 LACC1 OTULIN TNFSF4 TEK AGTR1 LETMD1 NAIP CD200 APP RB1 SERPINE1 NOD2 ALOX5 CCN4 CCN3 SNCA S100A12 ELANE IL17RA PRKCD TSLP NR1D1 NR1D2 ACE2 IL22RA1 FBXL2 VAMP2 PTGES VAMP3 NAPEPLD MGST2 IFI35 GBA1 GATA3 PLA2G7 LGALS2 LGALS1 PDE2A FFAR4 APOE IL12B FFAR2 CCR2 GSDMD ANXA1 IL10 IL15 IL16 IL13 IL10RA SPHK1 IL18 CD200R1 TLR2 IL1B BST1 CYLD GPRC5B TLR9 TLR7…	3.5394e-05	#440154	0.5	0	12	2.72554		16	9.12297	-1.31245	Cluster 0	Regulation Of Inflammatory Response (GO:0050727)	IL1R1 CMA1 ACOD1 ISL1 MAPK13 FNDC4 IL23A NINJ1 LACC1 OTULIN TNFSF4 TEK AGTR1 LETMD1 NAIP CD200 APP RB1 SERPINE1 NOD2 ALOX5 CCN4 CCN3 SNCA S100A12 ELANE IL17RA PRKCD TSLP NR1D1 NR1D2 ACE2 IL22RA1 FBXL2 VAMP2 PTGES VAMP3 NAPEPLD MGST2 IFI35 GBA1 GATA3 PLA2G7 LGALS2 LGALS1 PDE2A FFAR4 APOE IL12B FFAR2 CCR2 GSDMD ANXA1 IL10 IL15 IL16 IL13 IL10RA SPHK1 IL18 CD200R1 TLR2 IL1B BST1 CYLD GPRC5B TLR9 TLR7…	0.00550852	#440154	0.5	0	12	1.62948
4176	10.5775	-0.742875	Cluster 10	Positive Regulation Of p38MAPK Cascade (GO:1900745)	MAP3K4 SPI1 GADD45B GADD45A SPHK1 MINK1 GADD45G PRMT1 SORD GDF6 MFHAS1 VEGFA PJA2 IL1B BMP4 BMP2 ZC3H12A STK39 LEP HAND2 RELL1 RELL2 NCF1 SASH1 TNIP1 ZC3H12A EHD1 SBNO2 PFKFB3 NFKB2 ICAM1 BCL3 OGFR IER3 MAPKAPK2 SPHK1 SRC CEBPB PLEKHM2 TICAM1 CHMP4B RAB35 TRIP10 PIM3 RNF19B GRINA NINJ1 MYO9B PLAUR SIRPA GRAMD1A GADD45B ARHGEF11 MMP19 MGAT1 GRN GPR84 LAMP1 RELB AMPD3 TNFRSF1B CTSZ SPSB1 SLC15A3 ME…	3.07365e-06	#aec7e8	0.5	0	12	3.25617		17	9.52473	-1.36082	Cluster 0	Regulation Of Immunoglobulin Production (GO:0002637)	CR1 FCRL3 IL10 XBP1 HLA-E IL2 IL4 PTPRC FCGR2B IL6 TNFSF4 CLCF1 TLR9 VAMP3 GPI MZB1 CD86 PHB2 SUPT6H IL21 PHB1 POLR2D DNAJB9 STX4 TNFRSF4 EPHB2 SASH3 TNIP1 TNFRSF1B LILRB2 NFKB2 HCK EHD1 PILRA PIK3R5 HCLS1 LYN LAPTM5 BCL3 NINJ1 NCF2 RNF19B RELB TRAF1 FCGR2B LCP1 LITAF MAN2B1 TAP1 TRIM25 SLC15A3 MYO9B RHOG IL10RA OSCAR TLR2 UNC93B1 ZC3H12A THEMIS2 PRKCD TLR8 ELF4 ARAP1 PPP1R18 NFKB1 SBNO2 BCL2A1 S…	7.89592e-08	#440154	0.5	0	12	4.0513		17	9.52473	-1.36082	Cluster 0	Regulation Of Immunoglobulin Production (GO:0002637)	CR1 FCRL3 IL10 XBP1 HLA-E IL2 IL4 PTPRC FCGR2B IL6 TNFSF4 CLCF1 TLR9 VAMP3 GPI MZB1 CD86 PHB2 SUPT6H IL21 PHB1 POLR2D DNAJB9 STX4 TNFRSF4 EPHB2 SASH3 TNIP1 TNFRSF1B LILRB2 NFKB2 HCK EHD1 PILRA PIK3R5 HCLS1 LYN LAPTM5 BCL3 NINJ1 NCF2 RNF19B RELB TRAF1 FCGR2B LCP1 LITAF MAN2B1 TAP1 TRIM25 SLC15A3 MYO9B RHOG IL10RA OSCAR TLR2 UNC93B1 ZC3H12A THEMIS2 PRKCD TLR8 ELF4 ARAP1 PPP1R18 NFKB1 SBNO2 BCL2A1 S…	0.314894	#440154	0.5	0	5	0.750918
4177	10.855	-1.18674	Cluster 10	Positive Regulation Of Fever Generation (GO:0031622)	TNFRSF11A PTGER3 TNFSF11 TNF PTGS2 TNF PTGS2 IL1B ZC3H12A ICAM1 TRAF1 PFKFB3 CXCL3 SOCS3 MMP19 PLAUR SLAMF7 IL10 GPR84 RNF19B CXCL8 IL1RN IER3 AMPD3 SERPINB2 NFKB1 IL27 TNIP1 IRAK2 EHD1 MSC CCL3L3 TNFRSF11A ACOD1 SOD2 NINJ1 NIPAL4 CD274 ADORA2A NFKB2 SRC CCRL2 GPR132 CD40 RAB7B SLC2A6 TNIP3 OASL TNFSF11 CCR5 BCL3 KMO SQRDL SOCS1 GRAMD1A TNFSF9 SIGLEC1 NEURL3 IL6 TICAM1 CCL3 SPHK1 DHX58 LILRB4 PIM…	2.8139e-08	#aec7e8	0.5	0	12	4.27535		18	8.96341	-1.80587	Cluster 0	Regulation Of Immune Response (GO:0050776)	SPINK5 LYN TGFB2 LAG3 IL15 RIPK3 AMBP APLP2 RSAD2 FOXP3 IL4 IRF1 COL3A1 FCGR2B CXCL13 IRF4 BCL6 TNFSF4 SPNS2 HLA-DRA IRF7 SMCR8 PDCD1 NFE2L2 CD22 FCGR1BP FGL1 DENND1B PTPN22 C8A AHR CGAS INPPL1 C8B TREM2 LRP8 C8G IFNL1 SPN FCGR3A CASP8 FCGR3B TKFC GPR151 N4BP1 SYK SH2D1A ERAP1 TIRAP HLA-G FGR FKBP1A PLSCR1 XIAP GPR108 BIRC2 BIRC3 HLA-DRB1 CD276 PLA2G1B SPPL2B SPPL2A WDR41 CFP SLA2 SAMHD1 FCRLB IL…	0.000158281	#440154	0.5	0	12	2.40028		18	8.96341	-1.80587	Cluster 0	Regulation Of Immune Response (GO:0050776)	SPINK5 LYN TGFB2 LAG3 IL15 RIPK3 AMBP APLP2 RSAD2 FOXP3 IL4 IRF1 COL3A1 FCGR2B CXCL13 IRF4 BCL6 TNFSF4 SPNS2 HLA-DRA IRF7 SMCR8 PDCD1 NFE2L2 CD22 FCGR1BP FGL1 DENND1B PTPN22 C8A AHR CGAS INPPL1 C8B TREM2 LRP8 C8G IFNL1 SPN FCGR3A CASP8 FCGR3B TKFC GPR151 N4BP1 SYK SH2D1A ERAP1 TIRAP HLA-G FGR FKBP1A PLSCR1 XIAP GPR108 BIRC2 BIRC3 HLA-DRB1 CD276 PLA2G1B SPPL2B SPPL2A WDR41 CFP SLA2 SAMHD1 FCRLB IL…	9.18391e-05	#440154	0.5	0	12	2.51849
4178	10.7914	-0.550487	Cluster 10	Positive Regulation Of Smooth Muscle Cell Proliferation (GO:0048661)	TGFB1 EDN1 PDGFRB MEF2D IL10 JUN STAT1 IGFBP5 MMP2 SERPINF2 HTR1B FOXJ2 IGF1 IL18 MMP9 EREG ERN1 NR4A3 FOXP1 BMP4 IL6 ID2 CDH13 DNMT1 NOX1 BMPR1A PHB1 HDAC1 PDGFB THBS1 TNF FGF2 AIF1 CX3CL1 P2RY6 GJA1 FGF9 CCL5 MFN2 AKT1 HMOX1 CCN4 LDLRAP1 IL6R HES5 RBPMS2 ELANE MAPKAPK2 MGAT1 TNIP1 EHD1 LAMP1 GRN BCL3 SPHK1 SBNO2 ICAM1 MAN2B1 ZC3H12A CTSZ METRNL NINJ1 TICAM1 PLAUR ENG PFKFB3 MYO9B PLEKHM2 IER3 C…	0.000304906	#aec7e8	0.5	0	12	2.25792		19	8.78717	-1.42152	Cluster 0	Regulation Of Homotypic Cell-Cell Adhesion (GO:0034110)	LYN CELA2A RDX SYK CCL5 TNFSF11 ZNF703 PRKCQ PLAUR PRKCA JAK1 LYN HCLS1 PIK3R5 JAK1 LAPTM5 WIPF1 HCK TNFRSF1B NCF2 SYK LILRB2 CTSS LCP2 LCP1 AOAH RASSF5 TLR2 PILRA IL10RA CD53 STX11 TLR8 THEMIS2 PTPRC GBP2 CYTH4 HLA.E ITGAX DOCK2 ADGRE2 DOCK8 LILRB3 FMNL1 ARAP1 ELF4 PTPN6 CCR1 SIGLEC9 C5AR1 OSCAR FGR LSP1 ARHGAP30 PIK3AP1 IL17RA PPP1R18 ARRB2 GPSM3 CASP4 LITAF TLR4 CYTH1 RNF19B TNIP1 CCR5 PTPRJ E…	5.10659e-11	#440154	0.5	0	12	5.64593		19	8.78717	-1.42152	Cluster 0	Regulation Of Homotypic Cell-Cell Adhesion (GO:0034110)	LYN CELA2A RDX SYK CCL5 TNFSF11 ZNF703 PRKCQ PLAUR PRKCA JAK1 LYN HCLS1 PIK3R5 JAK1 LAPTM5 WIPF1 HCK TNFRSF1B NCF2 SYK LILRB2 CTSS LCP2 LCP1 AOAH RASSF5 TLR2 PILRA IL10RA CD53 STX11 TLR8 THEMIS2 PTPRC GBP2 CYTH4 HLA.E ITGAX DOCK2 ADGRE2 DOCK8 LILRB3 FMNL1 ARAP1 ELF4 PTPN6 CCR1 SIGLEC9 C5AR1 OSCAR FGR LSP1 ARHGAP30 PIK3AP1 IL17RA PPP1R18 ARRB2 GPSM3 CASP4 LITAF TLR4 CYTH1 RNF19B TNIP1 CCR5 PTPRJ E…	0.0317009	#440154	0.5	0	12	1.24946
4179	10.8317	-1.06338	Cluster 10	Sphingoid Metabolic Process (GO:0046519)	KDSR SPTLC3 NAAA SPHK2 SPHK1 DEGS2 PLPP3 SGPP2 PLPP2 SGPP1 PLPP1 SGPP2 SPHK1 PLPP2 KDSR PLPP1 SPHK2 PLPP3 ICAM1 MMP19 SPTLC3 DEGS2 METRNL NAAA SOD2 SPSB1 SGPP1 KYNU LILRB4 SQRDL DRAM1 NIPAL4 MSC AMPD3 SRC IER3 IL10 EHD1 CTSZ RBM47 BCL3 FCGRT ZC3H12A TNIP1 KMO MVP LAMP1 PLAUR NINJ1 NBL1 RAB7B CLDN23 C1QA ZNF562 CTSB SLC43A2 FLVCR2 MAPK13 SLC2A6 LILRB5 TMBIM1 LGMN TICAM1 GRN C1QC CD40 SLAMF7 CNGA1 …	5.41366e-07	#aec7e8	0.5	0	12	3.63325		20	9.32052	-1.52701	Cluster 0	Regulation Of Granulocyte Macrophage Colony-Stimulating Factor Production (GO:0032645)	CD84 IL23R CD80 IL18 LILRA2 ISL1 IL1B RASGRP1 IL23A TLR9 IL12B IL17F IL17D PAEP RIGI CD80 PILRA NFKB1 HCK TRAF1 TNFRSF1B LILRB2 PIK3R5 RNF19B SLC43A2 IL12B ADORA2A IL23A NINJ1 IL10RA TNIP1 LYN ITGAX TLR2 NCF2 CD274 SLC15A3 OSCAR TLR8 PIK3AP1 CCR5 LILRB1 ADGRE2 LILRA3 SIGLEC9 LILRB3 PTAFR LAPTM5 IL1B NCF1 CYTH4 CD53 NOD2 TNFAIP2 LILRB4 THEMIS2 C5AR1 SLAMF7 GPR132 SPI1 AMPD3 LILRA6 STX11 MYO1G MX2 …	3.80152e-11	#440154	0.5	0	12	5.71002		20	9.32052	-1.52701	Cluster 0	Regulation Of Granulocyte Macrophage Colony-Stimulating Factor Production (GO:0032645)	CD84 IL23R CD80 IL18 LILRA2 ISL1 IL1B RASGRP1 IL23A TLR9 IL12B IL17F IL17D PAEP RIGI CD80 PILRA NFKB1 HCK TRAF1 TNFRSF1B LILRB2 PIK3R5 RNF19B SLC43A2 IL12B ADORA2A IL23A NINJ1 IL10RA TNIP1 LYN ITGAX TLR2 NCF2 CD274 SLC15A3 OSCAR TLR8 PIK3AP1 CCR5 LILRB1 ADGRE2 LILRA3 SIGLEC9 LILRB3 PTAFR LAPTM5 IL1B NCF1 CYTH4 CD53 NOD2 TNFAIP2 LILRB4 THEMIS2 C5AR1 SLAMF7 GPR132 SPI1 AMPD3 LILRA6 STX11 MYO1G MX2 …	0.657333	#440154	0.5	0	5	0.591107
4180	10.729	-0.831046	Cluster 10	Protein Kinase B Signaling (GO:0043491)	TGFB1 PLK3 ZFP36L1 PTEN PIK3R3 MT3 IGF1 TSC2 TNF BTBD10 PAX2 IL1B SETX THEM4 MKRN2 CCL5 AKT1 NKX3-1 KDR TYRO3 CCL3 CCL2 EPHA2 GAS6 TNF IER3 CCL3 EHD1 IL1B PFKFB3 ZC3H12A PLAUR TNIP1 GPR84 ICAM1 SPHK1 MMP19 NFKB2 CCL3L3 SBNO2 CXCL3 BCL3 NINJ1 PLK3 SRC AMPD3 ADORA2A SOCS3 MSC RNF19B TRAF1 PLEKHM2 GRAMD1A TICAM1 SERPINB2 SLC2A6 PIM3 IRAK2 SIRPA METRNL CEBPB CCR5 IL1RN RELB MAPKAPK2 HELZ2 OGFR TNFAIP…	3.20686e-07	#aec7e8	0.5	0	12	3.74696		21	9.4184	-0.979752	Cluster 0	Positive Regulation Of Calcium-Mediated Signaling (GO:0050850)	NEUROD2 LACRT P2RX5 P2RX4 CLEC7A P2RX3 P2RX2 CDH13 CCL4 TRAT1 PLCG2 TREM2 P2RX4 CLEC7A TREM2 CD84 TNFAIP8 CCL4 C3AR1 IGSF6 TRAT1 LAPTM5 SLC15A3 CD53 CYTH4 IFI30 PTPRC CTSS SIGLEC9 NCF2 SP100 PIK3R5 PILRA LILRB4 TNFRSF1B AOAH ITGAX NPL ANKRD44 HCLS1 CCR1 NCKAP1L SLC43A2 DOCK8 ADGRE2 MSR1 TLR2 GBP2 CYBB C5AR1 IL10RA CCR5 LILRA6 CFLAR PLEKHO2 CD86 CD68 EMILIN2 NINJ1 HCK DOCK2 PTAFR ACP5 VAV1 ARHGAP2…	3.80152e-11	#440154	0.5	0	12	5.71002		21	9.4184	-0.979752	Cluster 0	Positive Regulation Of Calcium-Mediated Signaling (GO:0050850)	NEUROD2 LACRT P2RX5 P2RX4 CLEC7A P2RX3 P2RX2 CDH13 CCL4 TRAT1 PLCG2 TREM2 P2RX4 CLEC7A TREM2 CD84 TNFAIP8 CCL4 C3AR1 IGSF6 TRAT1 LAPTM5 SLC15A3 CD53 CYTH4 IFI30 PTPRC CTSS SIGLEC9 NCF2 SP100 PIK3R5 PILRA LILRB4 TNFRSF1B AOAH ITGAX NPL ANKRD44 HCLS1 CCR1 NCKAP1L SLC43A2 DOCK8 ADGRE2 MSR1 TLR2 GBP2 CYBB C5AR1 IL10RA CCR5 LILRA6 CFLAR PLEKHO2 CD86 CD68 EMILIN2 NINJ1 HCK DOCK2 PTAFR ACP5 VAV1 ARHGAP2…	0.0524462	#440154	0.5	0	5	1.14014
4181	10.8542	-1.20691	Cluster 10	Regulation Of Vitamin D Biosynthetic Process (GO:0060556)	IFNG SNAI2 TNF SNAI1 NFKB1 TNF NFKB1 CD274 TRAF1 ZC3H12A IL1B SNAI1 ICAM1 RNF19B SLAMF7 NFKB2 MSC TNIP1 PLAUR IL10 IL27 EHD1 IRAK2 IER3 MMP19 PFKFB3 IL1RN SOCS3 ACOD1 SERPINB2 ADORA2A GPR84 SPHK1 PTGS2 CXCL3 AMPD3 NIPAL4 CCL3L3 IL15RA TICAM1 DUSP5 TNIP3 NINJ1 SOD2 CCRL2 OASL SPSB1 GPR132 PIM3 TNFSF9 SOCS1 SRC TRIP10 DHX58 CD40 IL6 BCL3 CCR5 SLC2A6 CLCF1 RELB TNFAIP2 SLAMF1 CCL3 SQRDL PTPN1 GRAMD1…	2.8139e-08	#aec7e8	0.5	0	12	4.27535		22	8.3141	-1.28871	Cluster 0	Regulation Of Granulocyte Differentiation (GO:0030852)	HAX1 LEF1 C1QC CEACAM1 EVI2B TESC HCLS1 RUNX1 RARA HCLS1 WAS ARRB2 FMNL1 GPSM3 EVI2B SPI1 ARHGAP30 HCK ARAP1 C10ORF54 MYO1F PLCB2 THEMIS2 SELPLG APOBR SMAP2 GMIP ARHGAP45 NFAM1 IL17RA GRK2 CORO1A LILRB3 EFHD2 LAPTM5 ARHGAP27 VASP NCF2 CYTH4 HLA.E ABTB1 ADGRE5 LRRC25 STAT6 NCF1B NCF4 NADK RARA WIPF1 TCIRG1 RIN3 HLA.A CSF2RB ADAM8 ARHGAP4 LCP1 RASSF5 HLA.B TNFRSF1B APBB1IP ITGAX PTPN6 STXBP2 LSP1 F…	4.59717e-06	#440154	0.5	0	12	3.16875		22	8.3141	-1.28871	Cluster 0	Regulation Of Granulocyte Differentiation (GO:0030852)	HAX1 LEF1 C1QC CEACAM1 EVI2B TESC HCLS1 RUNX1 RARA HCLS1 WAS ARRB2 FMNL1 GPSM3 EVI2B SPI1 ARHGAP30 HCK ARAP1 C10ORF54 MYO1F PLCB2 THEMIS2 SELPLG APOBR SMAP2 GMIP ARHGAP45 NFAM1 IL17RA GRK2 CORO1A LILRB3 EFHD2 LAPTM5 ARHGAP27 VASP NCF2 CYTH4 HLA.E ABTB1 ADGRE5 LRRC25 STAT6 NCF1B NCF4 NADK RARA WIPF1 TCIRG1 RIN3 HLA.A CSF2RB ADAM8 ARHGAP4 LCP1 RASSF5 HLA.B TNFRSF1B APBB1IP ITGAX PTPN6 STXBP2 LSP1 F…	0.0169829	#440154	0.5	0	12	1.38499
4182	10.5918	-1.46905	Cluster 10	Tryptophan Catabolic Process (GO:0006569)	IL4I1 TDO2 AFMID KYNU KMO IDO1 IDO2 KYNU KMO IDO1 SLAMF7 IL4I1 IDO2 SOD2 LILRB4 GBP4 NEURL3 CD274 CD40 GBP1 ACOD1 CCR5 P2RX4 CD80 IL10 TRAF1 IL27 AFMID IL1RN GPR31 ICAM1 LILRA3 GPR84 PTGIR NINJ1 MSC ADORA2A CXCL11 LACTB TNFAIP8 MMP19 APOL3 RNF19B IRAK2 SLC2A6 C15ORF48 SLC27A5 TNIP3 TNF CD83 CCRL2 TMEM106A DHX58 IL15RA ACSM2A SLC43A2 PLAUR LILRB1 OASL AMPD3 TDO2 P2RX7 RSAD2 PLA2G7 SQRDL CXCL9 ANKR…	1.76609e-06	#aec7e8	0.5	0	12	3.37649		23	7.89225	-1.99709	Cluster 0	Regulation Of Fibroblast Apoptotic Process (GO:2000269)	BTG1 STK17A STK17B PRDM11 GAS6 SFRP1 IER3IP1 TP63 STK17A BTG1 STK17B GAS6 TP63 SFRP1 PRDM11 DGKA MYH9 PIK3IP1 DSC3 SLFN5 CYTIP NR3C1 AIM1 CXCR4 IFFO2 TNFAIP3 IL7R PERP GLIPR1 JUNB EHD2 PTPRC ETS1 ATP10D EFEMP2 LRP10 SERPINB5 MXRA8 MMP14 ACTR3 ITGB1 LBH CHPF2 CERS3 STK4 TLN1 CLCA2 TGFBR2 CDC42EP3 MCL1 HECA RHOH TRIM29 COL12A1 ITK PPP1R15A CD44 KRT5 COL17A1 TRAT1 KRT14 CD248 NLRC5 MBNL1 SP100 ACTN1…	9.17217e-05	#440154	0.5	0	12	2.51876		23	7.89225	-1.99709	Cluster 0	Regulation Of Fibroblast Apoptotic Process (GO:2000269)	BTG1 STK17A STK17B PRDM11 GAS6 SFRP1 IER3IP1 TP63 STK17A BTG1 STK17B GAS6 TP63 SFRP1 PRDM11 DGKA MYH9 PIK3IP1 DSC3 SLFN5 CYTIP NR3C1 AIM1 CXCR4 IFFO2 TNFAIP3 IL7R PERP GLIPR1 JUNB EHD2 PTPRC ETS1 ATP10D EFEMP2 LRP10 SERPINB5 MXRA8 MMP14 ACTR3 ITGB1 LBH CHPF2 CERS3 STK4 TLN1 CLCA2 TGFBR2 CDC42EP3 MCL1 HECA RHOH TRIM29 COL12A1 ITK PPP1R15A CD44 KRT5 COL17A1 TRAT1 KRT14 CD248 NLRC5 MBNL1 SP100 ACTN1…	0.145921	#440154	0.5	0	5	0.917941
4183	10.8892	-1.23736	Cluster 10	Positive Regulation Of Gliogenesis (GO:0014015)	PRKCH PRKCI IL6 LRP2 TNF SOX8 IL6 TNF TRAF1 IL1B ZC3H12A IL27 ICAM1 PFKFB3 ACOD1 SLAMF7 SOCS3 CXCL3 IL10 SERPINB2 PTGS2 CCL3L3 NFKB1 RNF19B IL1RN CD274 NIPAL4 SOD2 OASL IER3 MMP19 EHD1 TNIP3 LRP2 ADORA2A SOX8 DHX58 AMPD3 SOCS1 PRKCH TNIP1 GPR84 GPR132 PLAUR CCL3 CSF3 CXCL2 CXCL8 IRAK2 NFKB2 CCR5 PRKCI GRAMD1A MSC NEURL3 IL1A CCRL2 IL10RA USP12 TNFSF9 FFAR3 CCL3L1 TNFAIP8 IL15RA PIM3 ARHGAP31 SLC2…	2.35942e-07	#aec7e8	0.5	0	12	3.8136		24	9.80128	-1.27854	Cluster 0	Negative Regulation Of Lymphocyte Proliferation (GO:0050672)	CR1 LYN PLA2G2E IL10 PLA2G2F GLMN CD300A PLA2G2D PLA2G2A SFTPD RC3H1 LILRB1 LILRB2 PDCD1LG2 TYROBP LILRB4 HLA-G SOX11 FOXP3 TNFRSF21 FCGR2B DLG5 MNDA ATM HLA-DRB1 LST1 CEBPB CD86 CD274 VTCN1 TNFRSF13B SDC4 CD80 PLA2G5 IL4I1 SPN GPNMB CTLA4 VSIG4 LILRB2 SLC15A3 PILRA HCK TNFRSF1B LILRB4 PIK3R5 LILRB1 SIGLEC9 CD68 CCR5 NCF2 OSCAR TNIP1 NINJ1 LYN TLR2 CTSZ EMILIN2 IFI30 RNF19B CTSS TLR8 CCR1 SIGLEC1…	6.5615e-14	#440154	0.5	0	12	7.0915		24	9.80128	-1.27854	Cluster 0	Negative Regulation Of Lymphocyte Proliferation (GO:0050672)	CR1 LYN PLA2G2E IL10 PLA2G2F GLMN CD300A PLA2G2D PLA2G2A SFTPD RC3H1 LILRB1 LILRB2 PDCD1LG2 TYROBP LILRB4 HLA-G SOX11 FOXP3 TNFRSF21 FCGR2B DLG5 MNDA ATM HLA-DRB1 LST1 CEBPB CD86 CD274 VTCN1 TNFRSF13B SDC4 CD80 PLA2G5 IL4I1 SPN GPNMB CTLA4 VSIG4 LILRB2 SLC15A3 PILRA HCK TNFRSF1B LILRB4 PIK3R5 LILRB1 SIGLEC9 CD68 CCR5 NCF2 OSCAR TNIP1 NINJ1 LYN TLR2 CTSZ EMILIN2 IFI30 RNF19B CTSS TLR8 CCR1 SIGLEC1…	0.0524462	#440154	0.5	0	5	1.14014
4184	10.868	-0.583032	Cluster 10	Cellular Response To Platelet-Derived Growth Factor Stimulus (GO:0036120)	SYAP1 MARS1 HDAC1 HYAL1 HAS2 HAS1 PDGFB MTSS2 HAS1 PDGFB HAS2 HYAL1 SYAP1 HDAC1 SPSB1 TRIP10 NECTIN2 SPHK1 ICAM1 IER3 RHOC PVR C2 C17ORF96 EHD4 MMP19 F2 SOCS3 SERPIND1 TNIP1 MST1 SLC39A14 SLC39A7 POR ABTB2 LRRC59 EHD1 ZC3H12A CFB RRBP1 BCL3 IL6 SERPINF2 PIM3 P4HB APOH TJP2 ASGR2 EMP1 MAPKAPK2 SLC25A10 AMBP ABCD1 NOMO1 CERS2 PTPN1 ITIH3 MYO1C PAH PLXND1 PROC ALDH4A1 CLCF1 SHB C3 NFKB2 TICAM1 SURF4…	5.21798e-05	#aec7e8	0.5	0	12	2.64125		25	8.16176	-1.40948	Cluster 0	Negative Regulation Of Lymphocyte Apoptotic Process (GO:0070229)	FOXP1 IRS2 BCL6 ORMDL3 PIP CCL5 PRKCQ NOC2L IL2 BCL6 PRKCQ CCL5 ORMDL3 IL2 IRS2 PIP CST7 STAT5B NBEAL2 HLA.E FBRS CDC42SE1 FMNL1 SMAP2 TRBC2 SELPLG GRK2 NKG7 PIK3CD SBNO2 ARHGAP45 SUN2 CD3D XPO6 GRK6 ARRB2 RARA RASSF5 STXBP2 NADK ABCA7 DEF6 ATG2A IRF1 ADGRE5 ABTB1 GPSM3 KDM6B C10ORF54 CD3E TRAC WIPF1 ZDHHC18 EHBP1L1 WDTC1 CORO1A IL3 WAS ARAP1 REXO1 CD8A ANAPC2 HCLS1 RXRA FAM65B CEACAM3 UPF1 MLLT6…	0.110234	#440154	0.5	0	5	0.978842		25	8.16176	-1.40948	Cluster 0	Negative Regulation Of Lymphocyte Apoptotic Process (GO:0070229)	FOXP1 IRS2 BCL6 ORMDL3 PIP CCL5 PRKCQ NOC2L IL2 BCL6 PRKCQ CCL5 ORMDL3 IL2 IRS2 PIP CST7 STAT5B NBEAL2 HLA.E FBRS CDC42SE1 FMNL1 SMAP2 TRBC2 SELPLG GRK2 NKG7 PIK3CD SBNO2 ARHGAP45 SUN2 CD3D XPO6 GRK6 ARRB2 RARA RASSF5 STXBP2 NADK ABCA7 DEF6 ATG2A IRF1 ADGRE5 ABTB1 GPSM3 KDM6B C10ORF54 CD3E TRAC WIPF1 ZDHHC18 EHBP1L1 WDTC1 CORO1A IL3 WAS ARAP1 REXO1 CD8A ANAPC2 HCLS1 RXRA FAM65B CEACAM3 UPF1 MLLT6…	0.0104612	#440154	0.5	0	12	1.49021
4185	10.7072	-0.96553	Cluster 10	Negative Regulation Of Cell Junction Assembly (GO:1901889)	ACVRL1 SRC PHLDB2 DMTN DYNLL1 ROCK1 ROCK2 FAM107A PTEN THBS1 TNF ARHGAP6 CORO1C ROBO2 TLR2 IL1B IKBKB DUSP22 ITGB1BP1 RCC2 SLIT1 APOD CLASP2 BCAS3 IL1B SRC PFKFB3 SIRPA CXCL3 TNF IRAK2 GPR84 USP12 PLAUR ARHGAP31 TNIP1 TLR2 SERPINB2 AMPD3 EHD1 ICAM1 IER3 MMP19 DENND5A RNF19B PLEKHM2 PDGFB SPHK1 ADORA2A MSC LILRB2 SLC2A6 TRAF1 SOD2 CXCL8 PTGS2 NINJ1 ZC3H12A ARHGEF11 MOB3C ATP13A3 SLC43A2 ARL8A STX1…	1.94958e-10	#aec7e8	0.5	0	12	5.35503		26	8.62237	-1.77149	Cluster 0	Negative Regulation Of Lymphocyte Activation (GO:0051250)	LST1 DUSP3 VTCN1 FGL1 ILDR2 TNFAIP3 LAPTM5 PTPN22 FOXJ1 SAMSN1 SOX11 LAX1 IL4I1 LGALS3 FCGR2B GPNMB TNFAIP8L2 PIBF1 CTSG JAK3 TIGIT MICA PAG1 LAPTM5 CD53 HCLS1 PIK3R5 TNFRSF1B RASSF5 HCK JAK3 PTPN6 NCKAP1L LCP1 PILRA CYTH4 LSP1 CYTH1 LCP2 CD4 ARHGAP30 HLA.E AOAH THEMIS2 IL10RA CTSS NCF2 GPSM3 SLC15A3 CCR1 GBP2 SPI1 LGALS9 DOCK2 ITGAX HLA.A WIPF1 TNFRSF14 LPXN RIN3 LILRB2 OSCAR SIGLEC9 C5AR1 FMNL1…	4.95228e-08	#440154	0.5	0	12	4.1526		26	8.62237	-1.77149	Cluster 0	Negative Regulation Of Lymphocyte Activation (GO:0051250)	LST1 DUSP3 VTCN1 FGL1 ILDR2 TNFAIP3 LAPTM5 PTPN22 FOXJ1 SAMSN1 SOX11 LAX1 IL4I1 LGALS3 FCGR2B GPNMB TNFAIP8L2 PIBF1 CTSG JAK3 TIGIT MICA PAG1 LAPTM5 CD53 HCLS1 PIK3R5 TNFRSF1B RASSF5 HCK JAK3 PTPN6 NCKAP1L LCP1 PILRA CYTH4 LSP1 CYTH1 LCP2 CD4 ARHGAP30 HLA.E AOAH THEMIS2 IL10RA CTSS NCF2 GPSM3 SLC15A3 CCR1 GBP2 SPI1 LGALS9 DOCK2 ITGAX HLA.A WIPF1 TNFRSF14 LPXN RIN3 LILRB2 OSCAR SIGLEC9 C5AR1 FMNL1…	0.645336	#440154	0.5	0	5	0.595107
4186	10.5805	-1.44601	Cluster 10	Tryptophan Metabolic Process (GO:0006568)	IL4I1 KYNU HAAO KMO ATP7A IDO1 IDO2 KYNU KMO SLAMF7 IDO1 LILRB4 IL4I1 SOD2 CD274 CD40 NEURL3 CCR5 GBP4 CD83 CD80 TRAF1 GBP1 ACOD1 LILRA3 ICAM1 IL27 IDO2 IL1RN RNF19B NINJ1 GPR84 IL10 MSC ADORA2A CCRL2 LILRB1 AMPD3 P2RX4 MMP19 C15ORF48 PLAUR TNFAIP8 DHX58 SQRDL LILRB2 LACTB APOL6 PLA2G7 CXCL11 GPR31 SLC43A2 SLC2A6 TNF SLC15A3 TNIP1 APOL3 IRAK2 GPR132 HAAO SIGLEC1 IL15RA RSAD2 P2RX7 OASL ZC3H12A NF…	1.42884e-09	#aec7e8	0.5	0	12	4.92251		27	9.18747	-1.45724	Cluster 0	Regulation Of Innate Immune Response (GO:0045088)	PTPN1 AKIRIN2 TASL APLP2 MUL1 PTPN11 EREG ATG12 IRF1 FCGR2B POLR3B POLR3C POLR3D TRAFD1 POLR3F POLR3G TLR8 RNF185 IFNK ADAM8 PTPN6 TRIM56 NFE2L2 DHX9 TNFAIP3 FPR2 PTPN22 CGAS DTX4 NLRC3 TREM2 LRP8 AURKB PPP6C CASP8 TKFC IRAK3 IFI16 AKT1 BANF1 FADD GBP5 LYAR N4BP1 ERAP1 PARP1 SH2D1B TIRAP YWHAZ ZDHHC18 HLA-E PARP9 FGR MYO1C PLSCR1 CDC37 XIAP TYRO3 CEP63 CACTIN BIRC2 BIRC3 CFH IFI35 PRKDC CD1D SAMH…	7.54583e-09	#440154	0.5	0	12	4.56115		27	9.18747	-1.45724	Cluster 0	Regulation Of Innate Immune Response (GO:0045088)	PTPN1 AKIRIN2 TASL APLP2 MUL1 PTPN11 EREG ATG12 IRF1 FCGR2B POLR3B POLR3C POLR3D TRAFD1 POLR3F POLR3G TLR8 RNF185 IFNK ADAM8 PTPN6 TRIM56 NFE2L2 DHX9 TNFAIP3 FPR2 PTPN22 CGAS DTX4 NLRC3 TREM2 LRP8 AURKB PPP6C CASP8 TKFC IRAK3 IFI16 AKT1 BANF1 FADD GBP5 LYAR N4BP1 ERAP1 PARP1 SH2D1B TIRAP YWHAZ ZDHHC18 HLA-E PARP9 FGR MYO1C PLSCR1 CDC37 XIAP TYRO3 CEP63 CACTIN BIRC2 BIRC3 CFH IFI35 PRKDC CD1D SAMH…	0.00962043	#440154	0.5	0	12	1.5084
4187	10.6655	-1.26461	Cluster 10	Negative Regulation Of Cell Development (GO:0010721)	NOTCH1 GSK3B GSK3A WNT3A CCL11 CAV3 MBD1 WNT7A IGF1 TNF PAX6 SORL1 RFLNA RFLNB IL1B PTHLH IL6 HOOK3 REST DYNLT1 B2M IL17D IL1B TNF RNF19B IL6 ZC3H12A TNIP1 PFKFB3 PTGS2 TRAF1 SOD2 TNFAIP2 EHD1 CXCL3 LILRB2 ADORA2A NFKB1 AMPD3 SOCS3 NFKB2 PIK3R5 BCL3 GPR84 SERPINB2 ADGRE2 CXCL8 CASP5 ICAM1 TNFRSF1B TLR2 IRAK2 IER3 IL1A PILRA SIRPA SRC DENND5A SLAMF7 NINJ1 KDM6B ACSL1 SBNO2 GRAMD1A TLR8 CD274 HCK S…	3.00971e-09	#aec7e8	0.5	0	12	4.76074		28	8.50606	-0.983548	Cluster 0	Erythrocyte Development (GO:0048821)	MED1 ZBTB7A DMTN ALAS2 G6PD ALAS1 NCKAP1L HEATR3 SH2B3 LYAR GATA1 SLC25A39 GYPC DMTN NCKAP1L ELF4 TGFB1 BCL2L1 SH2B3 R3HDM4 VASP FKBP8 EHBP1L1 RBM38 TLN1 ALAS2 PPP6R1 ARAP1 RPS6KA1 OR2W3 GRK6 STXBP2 MYO9B ARRB2 GRK2 ZBTB7A THEMIS2 SH3BP1 RAB35 CHST11 CSK OAZ1 WDR81 PHOSPHO1 ADIPOR1 EFHD2 FERMT3 DNM2 PLEKHO2 KLF13 PPP1R9B GNAI2 PRKCD MAN2B1 LCP1 DOCK2 FMNL1 PPP1R18 ARHGEF2 EPB42 FOXO4 MPP1 NCF2 ST…	0.00485147	#440154	0.5	0	12	1.65706		28	8.50606	-0.983548	Cluster 0	Erythrocyte Development (GO:0048821)	MED1 ZBTB7A DMTN ALAS2 G6PD ALAS1 NCKAP1L HEATR3 SH2B3 LYAR GATA1 SLC25A39 GYPC DMTN NCKAP1L ELF4 TGFB1 BCL2L1 SH2B3 R3HDM4 VASP FKBP8 EHBP1L1 RBM38 TLN1 ALAS2 PPP6R1 ARAP1 RPS6KA1 OR2W3 GRK6 STXBP2 MYO9B ARRB2 GRK2 ZBTB7A THEMIS2 SH3BP1 RAB35 CHST11 CSK OAZ1 WDR81 PHOSPHO1 ADIPOR1 EFHD2 FERMT3 DNM2 PLEKHO2 KLF13 PPP1R9B GNAI2 PRKCD MAN2B1 LCP1 DOCK2 FMNL1 PPP1R18 ARHGEF2 EPB42 FOXO4 MPP1 NCF2 ST…	0.0140773	#440154	0.5	0	12	1.42574
4188	10.5948	-1.0886	Cluster 10	Positive Regulation Of Osteoclast Differentiation (GO:0045672)	TNFRSF11A CSF1 IL23R TMEM64 NEDD9 TNF TYROBP POU4F1 POU4F2 IL17A PPP3CA IL23A TRAF6 IFNG OCSTAMP TNFSF11 IL12B EEIG1 CD274 TNF SLC15A3 IL23A TRAF1 MMP19 PLAUR NINJ1 ICAM1 NFKB1 IL4I1 OCSTAMP IL17A AMPD3 MSC LILRB4 GPR137B IL1RN CD68 SQRDL IL12B RAB7B CSF1 CCR5 GM2A IRAK2 ZC3H12A CTSZ TNIP1 PILRA TYROBP GPR84 IL10 CXCL3 EMILIN2 CCRL2 SLAMF7 SLC43A2 MMP9 ADORA2A CD40 RNF19B CYP27B1 TRAF6 IER3 TNFRS…	1.04394e-10	#aec7e8	0.5	0	12	5.49066		29	8.9188	-1.61693	Cluster 0	Regulation Of Interleukin-2 Production (GO:0032663)	CCR2 CR1 CARD11 GLMN HOMER2 HOMER3 XCL1 PRNP SFTPD PDE4D RUNX1 LAPTM5 TRAF2 NAV3 LILRB4 FOXP3 IL1A IL1B PTPRC CD4 IRF4 TRAF6 CD28 IL17F PRKD2 EZR CD86 STOML2 CD80 TNFAIP3 HDAC9 MALT1 PNP ZFP36 CLEC7A KAT5 TBX21 PDE4B GBP1 VSIG4 TRIM27 RPS3 PLCG2 MAP3K7 HAVCR2 SPTBN1 CD34 PIK3R5 LAPTM5 HCLS1 IL10RA TNFRSF1B CYTH1 LCP1 DOCK2 RASSF5 MYO1G LILRB2 CD53 HCK CD4 NCKAP1L THEMIS2 TLR2 ARHGAP30 LCP2 LYN PI…	1.75881e-09	#440154	0.5	0	12	4.87739		29	8.9188	-1.61693	Cluster 0	Regulation Of Interleukin-2 Production (GO:0032663)	CCR2 CR1 CARD11 GLMN HOMER2 HOMER3 XCL1 PRNP SFTPD PDE4D RUNX1 LAPTM5 TRAF2 NAV3 LILRB4 FOXP3 IL1A IL1B PTPRC CD4 IRF4 TRAF6 CD28 IL17F PRKD2 EZR CD86 STOML2 CD80 TNFAIP3 HDAC9 MALT1 PNP ZFP36 CLEC7A KAT5 TBX21 PDE4B GBP1 VSIG4 TRIM27 RPS3 PLCG2 MAP3K7 HAVCR2 SPTBN1 CD34 PIK3R5 LAPTM5 HCLS1 IL10RA TNFRSF1B CYTH1 LCP1 DOCK2 RASSF5 MYO1G LILRB2 CD53 HCK CD4 NCKAP1L THEMIS2 TLR2 ARHGAP30 LCP2 LYN PI…	0.0343933	#440154	0.5	0	12	1.23176
4189	10.8464	-1.283	Cluster 10	Cytoplasmic Sequestering Of NF-kappaB (GO:0007253)	NFKBIB PSMD10 TMSB4X NFKBIA IL10 FAF1 G3BP2 NFKBIA IL10 NFKBIB SLAMF7 TMSB4X ICAM1 TNF SOCS1 TRAF1 IL27 IL1RN SLAMF1 EHD1 CD40 MMP19 NIPAL4 PSMD10 TNFSF9 CCRL2 TNFAIP3 PPP1R15A ACOD1 ZC3H12A MSC ADORA2A RNF19B PLAUR DUSP2 CCL3L3 CCL3 GPR132 CD274 TNFAIP8 OASL NINJ1 NFKB2 GPR84 AMPD3 SOCS3 TNIP1 FFAR3 NEURL3 NFKB1 CCR5 TNIP3 IL15RA SPHK1 IER3 DHX58 LILRB4 NFKBIE SLC2A6 PIM3 ISG20 PFKFB3 BATF IL4I1…	5.64255e-07	#aec7e8	0.5	0	12	3.62426		30	8.79799	-1.59535	Cluster 0	Regulation Of Interleukin-4 Production (GO:0032673)	LEF1 CEBPB CD86 SYK GATA3 FOXP3 HLA-E SLC7A5 PRKCZ ZFPM1 IRF4 TNFSF4 NLRP3 DDIT3 RARA PRKCQ FCER1G CD40LG HAVCR2 LGALS9 ZP3 CLECL1P HLA-DRB1 LAPTM5 PIK3R5 LGALS9 HCLS1 FMNL1 TNFRSF1B HCK PTPN6 THEMIS2 ARRB2 GPSM3 SPI1 STXBP2 PILRA WAS CD53 LCP1 ARHGAP30 ARAP1 TCIRG1 RIN3 CYTH1 ARHGAP45 OSCAR FCER1G RASSF5 CD4 PRKCD CSK GMIP SIGLEC9 PLEKHO2 STX11 TGFB1 LILRB2 MAN2B1 RHOG NCKAP1L WIPF1 FERMT3 PLCB2…	1.1176e-07	#440154	0.5	0	12	3.97586		30	8.79799	-1.59535	Cluster 0	Regulation Of Interleukin-4 Production (GO:0032673)	LEF1 CEBPB CD86 SYK GATA3 FOXP3 HLA-E SLC7A5 PRKCZ ZFPM1 IRF4 TNFSF4 NLRP3 DDIT3 RARA PRKCQ FCER1G CD40LG HAVCR2 LGALS9 ZP3 CLECL1P HLA-DRB1 LAPTM5 PIK3R5 LGALS9 HCLS1 FMNL1 TNFRSF1B HCK PTPN6 THEMIS2 ARRB2 GPSM3 SPI1 STXBP2 PILRA WAS CD53 LCP1 ARHGAP30 ARAP1 TCIRG1 RIN3 CYTH1 ARHGAP45 OSCAR FCER1G RASSF5 CD4 PRKCD CSK GMIP SIGLEC9 PLEKHO2 STX11 TGFB1 LILRB2 MAN2B1 RHOG NCKAP1L WIPF1 FERMT3 PLCB2…	0.0070769	#440154	0.5	0	12	1.57508
4190	11.0642	-0.240819	Cluster 10	Negative Regulation Of Cell Cycle G1/S Phase Transition (GO:1902807)	MYO16 PRMT2 SUSD2 INHBA KLF4 WEE1 DLG1 RBL1 SLFN11 GFI1B RBL2 APC TFDP3 CDK2AP2 ZNF655 CRLF3 KANK2 RB1 CDKN1A FHL1 DCUN1D3 FAM107A PTEN JADE1 CDC73 PKD2 METTL13 SOX2 GPNMB APBB1 CCL2 BRD7 E2F7 DACT1 GPR15LG PKD2 WEE1 RB1 CDC73 INHBA ZNF655 DACT1 NEK7 DDR2 RBL1 MACF1 ARHGAP31 KANK2 DLG1 APC AKAP2 LRP1 GPNMB FBN1 SASH1 BACH1 ATP2B4 MYLK CDKN1A RHOQ PLPP3 TNS1 EPG5 SNX18 FAM149B1 CLIC4 FSTL1 SLFN11 …	9.55068e-05	#aec7e8	0.5	0	12	2.50998		31	8.37241	-1.27273	Cluster 0	Dendritic Cell Migration (GO:0036336)	CCR2 CCR1 CCL21 HMGB1 CLU EPS8 PIK3CG CXCR2 CXCR1 CXCR4 GPR183 CCL5 CCR7 CCL19 CCR6 CCR5 TRPM4 ASB2 HCK HLA.E HCLS1 CSF2RB NCF2 CD53 CYTH4 LILRB3 SELPLG GPSM3 HLA.B EVI2B MYO1F TLR8 THEMIS2 ITGAX LAPTM5 LCP1 LITAF TNFRSF1B LSP1 PTAFR ARRB2 ARHGAP30 WIPF1 LYN TAP1 WAS HLA.A CCR1 PILRA NFAM1 PIK3R5 CTSS FMNL1 SMAP2 C10ORF54 SECTM1 RASSF5 NCF1B FPR1 IL10RA APOBR TLR2 IRF1 CDC42SE1 LRRC25 AOAH CORO1A…	6.13283e-07	#440154	0.5	0	12	3.60617		31	8.37241	-1.27273	Cluster 0	Dendritic Cell Migration (GO:0036336)	CCR2 CCR1 CCL21 HMGB1 CLU EPS8 PIK3CG CXCR2 CXCR1 CXCR4 GPR183 CCL5 CCR7 CCL19 CCR6 CCR5 TRPM4 ASB2 HCK HLA.E HCLS1 CSF2RB NCF2 CD53 CYTH4 LILRB3 SELPLG GPSM3 HLA.B EVI2B MYO1F TLR8 THEMIS2 ITGAX LAPTM5 LCP1 LITAF TNFRSF1B LSP1 PTAFR ARRB2 ARHGAP30 WIPF1 LYN TAP1 WAS HLA.A CCR1 PILRA NFAM1 PIK3R5 CTSS FMNL1 SMAP2 C10ORF54 SECTM1 RASSF5 NCF1B FPR1 IL10RA APOBR TLR2 IRF1 CDC42SE1 LRRC25 AOAH CORO1A…	0.0169829	#440154	0.5	0	12	1.38499
4191	10.5859	-1.388	Cluster 10	RNA Phosphodiester Bond Hydrolysis (GO:0090501)	TOE1 CPSF3 KHNYN DICER1 ELAC1 RNASE6 RNASEH1 RNASE2 RNASE1 ERN1 SLFN14 XRN1 LACTB2 PDE12 POP1 NHP2 POP7 TRIR CSTF3 RPP30 PARN ZC3H12D ZC3H12A PCF11 ZC3H12C ZC3H12B NYNRIN NUDT16 TNFAIP8 ZC3H12A RNASEH1 PCF11 TRAF1 XRN1 TOE1 EMILIN2 CPSF3 PIK3R5 NFKBIE BAZ1A PSTPIP2 RPP30 PARN LILRB4 PDE12 AMPD3 ZNF267 LACTB2 ICAM1 CD40 NINJ1 NFKB1 SOD2 NCKAP1L IL10 NPL TNIP3 LACTB TNF POP1 SLAMF7 IRAK2 REL IRF5 P…	2.95936e-06	#aec7e8	0.5	0	12	3.2644		32	8.25868	-1.17754	Cluster 0	Desensitization Of G Protein-Coupled Receptor Signaling Pathway (GO:0002029)	GRK2 GRK3 ARRB1 DMBT1 ARRB2 GTF2H2 ADRB2 ADRB3 LY6G6E DRD3 ARR3 ARRB2 PLCB2 FMNL1 MYO1F GRK2 STXBP2 WAS C10ORF54 GPSM3 CFP IL17RA NFAM1 LRRC25 ARRB1 ARHGAP27 ARAP1 HCK APOBR ARHGAP45 SPI1 ARHGAP30 THEMIS2 AOAH CYTH4 FGR EFHD2 CCDC88B LRCH4 ITGAX ARHGAP4 HLA.E GMIP WIPF1 ADGRE5 LILRB3 MPEG1 LILRA2 HCLS1 NBEAL2 AKNA ABTB1 NCF2 DOK3 ATG16L2 RASGRP4 LAPTM5 CTSS PARVG LILRA6 C11ORF21 SIRPB2 LILRA1 NCK…	6.78739e-05	#440154	0.5	0	12	2.58415		32	8.25868	-1.17754	Cluster 0	Desensitization Of G Protein-Coupled Receptor Signaling Pathway (GO:0002029)	GRK2 GRK3 ARRB1 DMBT1 ARRB2 GTF2H2 ADRB2 ADRB3 LY6G6E DRD3 ARR3 ARRB2 PLCB2 FMNL1 MYO1F GRK2 STXBP2 WAS C10ORF54 GPSM3 CFP IL17RA NFAM1 LRRC25 ARRB1 ARHGAP27 ARAP1 HCK APOBR ARHGAP45 SPI1 ARHGAP30 THEMIS2 AOAH CYTH4 FGR EFHD2 CCDC88B LRCH4 ITGAX ARHGAP4 HLA.E GMIP WIPF1 ADGRE5 LILRB3 MPEG1 LILRA2 HCLS1 NBEAL2 AKNA ABTB1 NCF2 DOK3 ATG16L2 RASGRP4 LAPTM5 CTSS PARVG LILRA6 C11ORF21 SIRPB2 LILRA1 NCK…	0.115168	#440154	0.5	0	5	0.969334
4192	10.683	-1.30044	Cluster 10	DNA Damage Response, Signal Transduction By P53 Class Mediator Resulting In Cell Cycle Arrest (GO:0006977)	CDKN1B GML CDKN1A PLK3 CRADD PLK2 TRIAP1 PML MUC1 PRAP1 CHEK2 CASP2 RPL26 GTSE1 TP53 PIDD1 MDM2 TP53 CDKN1A PML PIDD1 PLK3 TRIAP1 MDM2 CHEK2 GTSE1 PLK2 CASP2 CRADD NFKB2 BAX PIM3 BCL3 TNFSF9 ZC3H12A RELB TICAM1 AEN RPL26 MOV10 RPS9 RPL27 TGIF1 AURKB MUC1 TNFRSF10B TRAF1 IER5 SOCS1 NUP62 RPL18A TNIP1 IER3 DUSP5 CD40 PMAIP1 HELZ2 GRAMD1A RP11.611O2.3 DTX2 C11ORF86 PRAP1 TRAF4 ICAM1 SLAMF1 SBNO2 TME…	0.0894553	#aec7e8	0.5	0	5	1.0242		33	8.20561	-0.871313	Cluster 0	Detection Of Bacterium (GO:0016045)	PGLYRP4 PGLYRP3 NOD1 SSC5D NOD2 NLRC4 HLA-A HLA-B PGLYRP2 PGLYRP1 NAIP HLA-DRB1 NOD2 NLRC4 HCK NCF2 LILRB3 TLR8 THEMIS2 IL17RA NFAM1 SIGLEC5 ARAP1 PLBD1 ALOX5 HK3 FGR ARRB2 C10ORF54 MYO1F TLR2 NAIP ITGAX CFP LRRC25 LILRA6 OSCAR APOBR CTSS SPI1 FPR1 FPR2 GLT1D1 NADK S100A8 CSF2RB NBEAL2 ITGAM SIRPB1 NCF1B AP5B1 LYN P2RY13 CEACAM3 WAS ADGRG3 PLCB2 FMNL1 SIGLEC9 AOAH TLR4 EVI2B S100A9 AC018755.18 SI…	3.51903e-08	#440154	0.5	0	12	4.22679		33	8.20561	-0.871313	Cluster 0	Detection Of Bacterium (GO:0016045)	PGLYRP4 PGLYRP3 NOD1 SSC5D NOD2 NLRC4 HLA-A HLA-B PGLYRP2 PGLYRP1 NAIP HLA-DRB1 NOD2 NLRC4 HCK NCF2 LILRB3 TLR8 THEMIS2 IL17RA NFAM1 SIGLEC5 ARAP1 PLBD1 ALOX5 HK3 FGR ARRB2 C10ORF54 MYO1F TLR2 NAIP ITGAX CFP LRRC25 LILRA6 OSCAR APOBR CTSS SPI1 FPR1 FPR2 GLT1D1 NADK S100A8 CSF2RB NBEAL2 ITGAM SIRPB1 NCF1B AP5B1 LYN P2RY13 CEACAM3 WAS ADGRG3 PLCB2 FMNL1 SIGLEC9 AOAH TLR4 EVI2B S100A9 AC018755.18 SI…	0.279944	#440154	0.5	0	5	0.776464
4193	10.7208	-1.31637	Cluster 10	DNA Damage Response, Signal Transduction By P53 Class Mediator (GO:0030330)	GML PLK3 ATRX CRADD PLK2 HIPK2 BATF PML TFAP4 BCL3 RPL26 MDM4 ATM TP53 MDM2 PAXIP1 CDKN1B USP10 CDKN1A SP100 TRIAP1 RPS27L FOXM1 NDRG1 MUC1 PRAP1 RPS6KA6 KAT5 MYO6 SESN2 CHEK2 NBN CASP2 E2F7 GTSE1 PIDD1 PML CDKN1A NFKB2 TRAF1 TP53 ZC3H12A SP100 BCL3 PLK3 ANKLE2 TNFSF9 TNIP1 SLAMF1 RELB PAXIP1 SLAMF7 PIM3 CD40 BATF ICAM1 SOD2 TICAM1 DUSP5 TFAP4 HELZ2 SOCS1 EHD1 MDM2 SESN2 TRIM25 RNF19B SBNO2 IL10 …	0.0299469	#aec7e8	0.5	0	12	1.26182		34	8.75324	-1.31562	Cluster 0	Positive Regulation Of Antigen Processing And Presentation (GO:0002579)	SLC11A1 CCL21 NOD1 NOD2 CCR7 NOD2 HCK LILRB2 TNFRSF1B THEMIS2 LILRB3 SLC11A1 FMNL1 ITGAX LYN NCF2 PILRA ARRB2 TCIRG1 PIK3R5 OSCAR CYTH4 WAS ARAP1 GPSM3 SPI1 IL10RA TLR2 LAPTM5 GMIP HLA.B HLA.E FGR TAP1 ARHGAP45 ARHGAP27 ADAM8 HCLS1 TYMP C10ORF54 NFAM1 MX2 MYO1F NCF1B STAT6 SECTM1 LRRC25 C5AR1 TLR8 PRKCD ARHGAP30 HLA.A CYTH1 BCL3 LILRA6 APOBR LGALS9 CSF2RB PLCB2 NCF1 AOAH SMAP2 CCR7 LITAF MPEG1 SI…	4.33526e-05	#440154	0.5	0	12	2.68149		34	8.75324	-1.31562	Cluster 0	Positive Regulation Of Antigen Processing And Presentation (GO:0002579)	SLC11A1 CCL21 NOD1 NOD2 CCR7 NOD2 HCK LILRB2 TNFRSF1B THEMIS2 LILRB3 SLC11A1 FMNL1 ITGAX LYN NCF2 PILRA ARRB2 TCIRG1 PIK3R5 OSCAR CYTH4 WAS ARAP1 GPSM3 SPI1 IL10RA TLR2 LAPTM5 GMIP HLA.B HLA.E FGR TAP1 ARHGAP45 ARHGAP27 ADAM8 HCLS1 TYMP C10ORF54 NFAM1 MX2 MYO1F NCF1B STAT6 SECTM1 LRRC25 C5AR1 TLR8 PRKCD ARHGAP30 HLA.A CYTH1 BCL3 LILRA6 APOBR LGALS9 CSF2RB PLCB2 NCF1 AOAH SMAP2 CCR7 LITAF MPEG1 SI…	0.542494	#440154	0.5	0	5	0.632803
4194	10.8831	-1.18509	Cluster 10	Regulation Of Nitrogen Compound Metabolic Process (GO:0051171)	ROCK2 TNF GBA1 CNDP1 SSH1 PM20D2 ALDH2 SELENOS IFNG APOE VPS35 MFSD2A LDLR MFSD2A ALDH2 APOE TNF SSH1 PFKFB3 LDLR ICAM1 CD274 IER3 MMP19 ROCK2 CNDP1 LAMP1 PLAUR C2 SPHK1 SPSB1 SRC ZC3H12A TRIP10 IFNG SOD2 CXCL3 IL10 TNS3 SOCS3 LACTB CTSZ AMPD3 IL1B FNIP2 GPR84 PXDC1 CSF2 APOC1 ARHGAP31 NIPAL4 IRAK2 TRAF1 DRAM1 C1QC SEPP1 SERPINB2 INSIG1 LILRB4 SLCO2B1 RAB7B MSC KMO TNIP3 IL1RN TJP2 IL27 CCL3L3 PM…	1.25187e-08	#aec7e8	0.5	0	12	4.45122		35	8.89148	-1.87257	Cluster 0	Regulation Of Lymphocyte Proliferation (GO:0050670)	LST1 TNFSF18 PTPN22 IKZF3 SOX11 TNFRSF1B MYDGF LGALS3 CD209 LEP FGF10 TNFSF9 IL12B IL12A TNFSF8 ZNF335 CD22 MZB1 TNFRSF1B LAPTM5 TNIP1 IRF5 CD53 TRAF1 MYO1G HCLS1 TNFRSF14 NFKB2 IL10RA PIK3R5 LILRB1 SLC15A3 EHD1 LSP1 HLA.DRB1 LILRB2 CD40 PTPN6 LCP1 LGALS9 MAN2B1 CYTH1 TAP1 HLA.A HCK PIK3AP1 TFEB PILRA ADORA2A RELB NINJ1 NFKBIE GPR132 SLAMF1 PRKCD VAV1 RASSF5 MOB3A CD48 NCKAP1L OSCAR RFTN1 TNFAIP8…	1.08819e-06	#440154	0.5	0	12	3.48165		35	8.89148	-1.87257	Cluster 0	Regulation Of Lymphocyte Proliferation (GO:0050670)	LST1 TNFSF18 PTPN22 IKZF3 SOX11 TNFRSF1B MYDGF LGALS3 CD209 LEP FGF10 TNFSF9 IL12B IL12A TNFSF8 ZNF335 CD22 MZB1 TNFRSF1B LAPTM5 TNIP1 IRF5 CD53 TRAF1 MYO1G HCLS1 TNFRSF14 NFKB2 IL10RA PIK3R5 LILRB1 SLC15A3 EHD1 LSP1 HLA.DRB1 LILRB2 CD40 PTPN6 LCP1 LGALS9 MAN2B1 CYTH1 TAP1 HLA.A HCK PIK3AP1 TFEB PILRA ADORA2A RELB NINJ1 NFKBIE GPR132 SLAMF1 PRKCD VAV1 RASSF5 MOB3A CD48 NCKAP1L OSCAR RFTN1 TNFAIP8…	0.429621	#440154	0.5	0	5	0.683457
4195	10.722	-0.80242	Cluster 10	Regulation Of Hormone Biosynthetic Process (GO:0046885)	EGR1 DGKQ STC2 FFAR3 HIF1A HIF1A STC2 FFAR3 DGKQ EGR1 SBNO2 GPR42 BCL3 FOSL2 MAPKAPK2 ZC3H12A RNF19B LRP10 HELZ2 IL27 IL1RN PTX3 EHD1 LAMP1 MYOF SOCS3 CHPF2 OGFR ACOD1 MYH9 TICAM1 MMP14 ACTN1 FAM129B CLCF1 PFKFB3 TNIP1 GAA CKAP4 SPHK1 DHX58 NECTIN2 IER3 TFE3 LOXL2 NIPAL4 SEC61A1 SDF4 SPSB1 RCN3 BCL9L GRINA ICAM1 TIMP2 EFEMP2 SLAMF7 LRP1 FLNA MXRA8 LAMB2 NDST1 GRAMD1A NFKB2 ARHGEF11 TPM4 VASN TRIM…	2.47032e-05	#aec7e8	0.5	0	12	2.80362		36	8.19579	-1.72322	Cluster 0	Regulation Of Lymphocyte Migration (GO:2000401)	STK10 SPN MSN AKT1 SPNS2 JAM2 MIA3 WASL GCSAM CCR6 SLC8B1 GPR15LG GRK2 MSN KLF13 MYO9B SUN2 CYTH1 STAT6 STK10 NBEAL2 ELF4 SH3BP1 ARHGEF1 ARHGAP45 GNAI2 TYK2 PTK2B ARHGAP30 DNM2 ARAP1 CSK SLC8B1 SPN DOCK2 ARHGAP4 PLCB2 PPP1R9B FMNL1 MYO1G PPP6R1 TLN1 AKNA TGFB1 ADCY7 NCKAP1L UNC13D ARHGEF2 NLRC5 HCLS1 LCP1 TMC6 EHBP1L1 RASSF5 ARHGAP27 TEP1 TCIRG1 EML3 PIK3CD VASP RPS6KA1 HLA.A RASAL3 CORO1A ATP2A3…	0.173754	#440154	0.5	0	5	0.880033		36	8.19579	-1.72322	Cluster 0	Regulation Of Lymphocyte Migration (GO:2000401)	STK10 SPN MSN AKT1 SPNS2 JAM2 MIA3 WASL GCSAM CCR6 SLC8B1 GPR15LG GRK2 MSN KLF13 MYO9B SUN2 CYTH1 STAT6 STK10 NBEAL2 ELF4 SH3BP1 ARHGEF1 ARHGAP45 GNAI2 TYK2 PTK2B ARHGAP30 DNM2 ARAP1 CSK SLC8B1 SPN DOCK2 ARHGAP4 PLCB2 PPP1R9B FMNL1 MYO1G PPP6R1 TLN1 AKNA TGFB1 ADCY7 NCKAP1L UNC13D ARHGEF2 NLRC5 HCLS1 LCP1 TMC6 EHBP1L1 RASSF5 ARHGAP27 TEP1 TCIRG1 EML3 PIK3CD VASP RPS6KA1 HLA.A RASAL3 CORO1A ATP2A3…	0.529492	#440154	0.5	0	5	0.63807
4196	10.8615	-1.21183	Cluster 10	Response To Corticosteroid (GO:0031960)	GHRHR IL1RN CALCR IL10 IL6 GOT1 PDCD7 AKR1C3 TNF SOX30 IL10 IL27 IL1RN TNF SLAMF7 ACOD1 ICAM1 NIPAL4 MMP19 TRAF1 IL6 ZC3H12A RNF19B FFAR3 SOCS3 CD274 PFKFB3 OASL MSC DHX58 CD40 EHD1 SOCS1 CCL3L3 PLAUR TNIP3 ABTB2 IL1B GPR84 NEURL3 TNIP1 SOD2 IER3 AMPD3 TRIP10 CCRL2 SLAMF1 SERPINB2 ADORA2A PTGS2 TNFSF9 CXCL3 SPHK1 LILRB4 SLC2A6 IL15RA FCAMR SIGLEC1 KMO NINJ1 GPR132 CLCF1 IRAK2 BCL3 CCR5 CCL3 SRC G…	1.14708e-05	#aec7e8	0.5	0	12	2.9702		37	8.20356	-2.11302	Cluster 0	Regulation Of Lymphocyte Differentiation (GO:0045619)	CCR2 SPINK5 ZNF683 FCRL3 PRELID1 NCKAP1L XRCC6 CRTAM METTL3 PRDM1 ZFP36L1 PRKDC IKZF3 ZFP36L2 IL4I1 CD2 TBX21 TLR9 SLAMF8 CD53 HCLS1 LCP1 LAPTM5 RASSF5 PTPN6 ARHGAP30 NCKAP1L CORO1A RASAL3 SASH3 HLA.E LSP1 RAC2 CSK WIPF1 IL2RG IKZF1 IKZF3 AKNA ARHGAP45 PTPRC DOCK2 RUNX3 CYTH1 GPSM3 ITGAL NLRC5 PIK3CD WAS RIN3 FMNL1 JAK3 IL16 SELPLG CDC42SE1 DOCK8 HLA.A ARHGAP25 TRAF3IP3 DENND1C HLA.B LPXN RPS6KA1…	2.8881e-05	#440154	0.5	0	12	2.76969		37	8.20356	-2.11302	Cluster 0	Regulation Of Lymphocyte Differentiation (GO:0045619)	CCR2 SPINK5 ZNF683 FCRL3 PRELID1 NCKAP1L XRCC6 CRTAM METTL3 PRDM1 ZFP36L1 PRKDC IKZF3 ZFP36L2 IL4I1 CD2 TBX21 TLR9 SLAMF8 CD53 HCLS1 LCP1 LAPTM5 RASSF5 PTPN6 ARHGAP30 NCKAP1L CORO1A RASAL3 SASH3 HLA.E LSP1 RAC2 CSK WIPF1 IL2RG IKZF1 IKZF3 AKNA ARHGAP45 PTPRC DOCK2 RUNX3 CYTH1 GPSM3 ITGAL NLRC5 PIK3CD WAS RIN3 FMNL1 JAK3 IL16 SELPLG CDC42SE1 DOCK8 HLA.A ARHGAP25 TRAF3IP3 DENND1C HLA.B LPXN RPS6KA1…	0.0169829	#440154	0.5	0	12	1.38499
4197	10.8291	-1.11255	Cluster 10	Regulation Of Nitric-Oxide Synthase Activity (GO:0050999)	CAV3 GCH1 S100A1 NOSIP ATP2B4 TERF2 DHFR IL1A IL1B NOS1AP PIK3CB DDAH2 DDAH1 LEP GLA FCER2 ZDHHC21 NPR3 NUS1P3 TNF HTR2B HIF1A INS EGFR TERT AKT1 APOE SCARB1 IL1B TNF PFKFB3 TNIP1 CXCL3 IL1A PLAUR MSC IRAK2 IER3 PTGS2 SERPINB2 ICAM1 SRC ZC3H12A GPR84 TRAF1 EHD1 NFKB1 MMP19 SPHK1 ARHGAP31 NFKB2 CCRL2 CXCL8 PLEKHM2 AMPD3 TRIP10 ADORA2A SLC2A6 GRAMD1A RNF19B TICAM1 LAMP1 PIM3 AC013444.1 NINJ1 SOCS3 …	3.13195e-05	#aec7e8	0.5	0	12	2.75209		38	8.50241	-1.56683	Cluster 0	Regulation Of Lymphocyte Apoptotic Process (GO:0070228)	LYN LGALS3 CD274 BTK PRKD2 CD3G JAK3 LYN HCLS1 JAK3 HCK LAPTM5 TNFRSF1B LCP1 GPSM3 HLA.E CD53 FMNL1 THEMIS2 CYTH1 LILRB2 LILRB3 TAP1 ARHGAP30 PTPN6 WIPF1 WAS NCF2 RASSF5 PIK3R5 GBP2 HLA.A HLA.B CYTH4 GMIP ARHGAP25 SMAP2 ITGAX ARHGAP45 NLRC5 CSF2RB LITAF MYO1G ARAP1 ARRB2 LGALS9 CORO1A IL10RA ADAM8 TLR8 IRF1 PIK3CD VASP STAT6 NCF1B LSP1 PILRA NCF1 PRKCD LCP2 DOCK2 FGR ARHGAP27 NOD2 SPI1 PPP1R18 AD…	1.17754e-05	#440154	0.5	0	12	2.96451		38	8.50241	-1.56683	Cluster 0	Regulation Of Lymphocyte Apoptotic Process (GO:0070228)	LYN LGALS3 CD274 BTK PRKD2 CD3G JAK3 LYN HCLS1 JAK3 HCK LAPTM5 TNFRSF1B LCP1 GPSM3 HLA.E CD53 FMNL1 THEMIS2 CYTH1 LILRB2 LILRB3 TAP1 ARHGAP30 PTPN6 WIPF1 WAS NCF2 RASSF5 PIK3R5 GBP2 HLA.A HLA.B CYTH4 GMIP ARHGAP25 SMAP2 ITGAX ARHGAP45 NLRC5 CSF2RB LITAF MYO1G ARAP1 ARRB2 LGALS9 CORO1A IL10RA ADAM8 TLR8 IRF1 PIK3CD VASP STAT6 NCF1B LSP1 PILRA NCF1 PRKCD LCP2 DOCK2 FGR ARHGAP27 NOD2 SPI1 PPP1R18 AD…	0.0169829	#440154	0.5	0	12	1.38499
4198	10.4383	-1.24303	Cluster 10	Positive Regulation Of Receptor Signaling Pathway Via JAK-STAT (GO:0046427)	PRLR IL10 F2R IL10RB IL10RA CSHL1 F2 TYK2 GH1 IL4 GH2 IL6 KIT CENPJ LEP OCIAD2 OCIAD1 CRLF3 IL7R NOTCH1 IL26 CAMK2A CSH2 CSH1 PRL TNF IFNL1 GHR ERBB4 EP300 CCL5 PTK2B PIBF1 CYP1B1 HES1 HES5 JAK2 IL10RA CSH1 CSHL1 CSH2 PSG3 PSG9 PSG11 GH2 CYP19A1 PSG1 PSG6 PIK3R5 LILRB2 SLC43A2 TRAF1 TNFRSF1B RNF19B PAPPA PSG4 TNF PAPPA2 PILRA TNFAIP2 TNIP1 CCR5 STX11 SLAMF7 DHX58 EHD1 ADORA2A ADAM12 HCK GPR132 ZC…	0.0209286	#aec7e8	0.5	0	12	1.33963		39	8.17819	-2.15735	Cluster 0	Regulation Of Lymphocyte Activation (GO:0051249)	FCRL3 KLRC3 CRTAM IKZF3 LCK CD4 KAT2A THEMIS2 SIT1 CLEC7A LEP CD19 ORC3 KLRD1 KLRC1 KLRC2 PAG1 DCAF15 HCLS1 CORO1A PTPRC AKNA HLA.E ARHGAP30 ARHGAP45 PIK3CD CD53 CYTH1 RASSF5 LCP1 WIPF1 CDC42SE1 FMNL1 WAS NLRC5 IL16 LAPTM5 RASAL3 GPSM3 ARHGAP25 DOCK8 CCDC88B ARHGEF1 SASH3 IKZF1 PTPN6 CSK LSP1 ITGAL IKZF3 CD3E SELPLG AOAH ARHGAP9 HLA.B PSD4 THEMIS2 FGD3 PSTPIP1 TMC6 DOCK2 JAK3 CLEC2D ARRB2 TRAF3IP…	0.0240533	#440154	0.5	0	12	1.30941		39	8.17819	-2.15735	Cluster 0	Regulation Of Lymphocyte Activation (GO:0051249)	FCRL3 KLRC3 CRTAM IKZF3 LCK CD4 KAT2A THEMIS2 SIT1 CLEC7A LEP CD19 ORC3 KLRD1 KLRC1 KLRC2 PAG1 DCAF15 HCLS1 CORO1A PTPRC AKNA HLA.E ARHGAP30 ARHGAP45 PIK3CD CD53 CYTH1 RASSF5 LCP1 WIPF1 CDC42SE1 FMNL1 WAS NLRC5 IL16 LAPTM5 RASAL3 GPSM3 ARHGAP25 DOCK8 CCDC88B ARHGEF1 SASH3 IKZF1 PTPN6 CSK LSP1 ITGAL IKZF3 CD3E SELPLG AOAH ARHGAP9 HLA.B PSD4 THEMIS2 FGD3 PSTPIP1 TMC6 DOCK2 JAK3 CLEC2D ARRB2 TRAF3IP…	0.115168	#440154	0.5	0	5	0.969334
4199	10.7432	-1.22973	Cluster 10	Regulation Of Isotype Switching (GO:0045191)	PAXIP1 SUPT6H IL10 PARP3 TFRC SHLD1 IL4 SHLD2 TRAPPC13 TP53BP1 KMT5C KMT5B SLC15A4 INSL6 MAD2L2 PAXIP1 KMT5C IL4 TFRC IL10 TRAPPC13 INSL6 TP53BP1 MTF1 TRAF1 SLC15A4 SUPT6H KMT5B MAD2L2 SLAMF7 IL27 PARP3 IL31 TNFSF9 IL1RN ICAM1 DOT1L NFKB2 NR4A3 PTPN1 IL5 GRAMD1A TNF CD40 SLAMF1 RNF19B ACOD1 TNIP3 ABTB2 BCL2A1 IL15RA SOCS1 MCOLN2 NIPAL4 DHX58 CD274 LILRB4 SOD2 ZFYVE26 AMPD3 TRAV26.2 MMP19 MSC FFAR…	0.00532347	#aec7e8	0.5	0	12	1.6369		40	8.32683	-1.16692	Cluster 0	Regulation Of Lipopolysaccharide-Mediated Signaling Pathway (GO:0031664)	LACRT DEFB118 NFKBIL1 CD180 LY86 DEFB114 CARD8 LY96 SCIMP PRKCA LILRA2 CX3CL1 TRIM5 CARD16 CACTIN CD36 LTF SASH1 CD55 SIGIRR TRIB1 THEMIS2 HCK FCER1G LY96 LAPTM5 SPI1 ARRB2 OSCAR LY86 IL17RA LRRC25 NCF2 ITGAX CTSS LILRB3 CYTH4 CFP LILRA2 FGR WAS FMNL1 ALOX5 PILRA HCLS1 SIGLEC9 GPSM3 C10ORF54 AOAH EVI2B PLCB2 IGSF6 ARHGAP30 TNFRSF1B CD53 APOBR MYO1F PLBD1 NFAM1 ARAP1 ARHGAP27 C5AR1 TYROBP STX11 NC…	3.51903e-08	#440154	0.5	0	12	4.22679		40	8.32683	-1.16692	Cluster 0	Regulation Of Lipopolysaccharide-Mediated Signaling Pathway (GO:0031664)	LACRT DEFB118 NFKBIL1 CD180 LY86 DEFB114 CARD8 LY96 SCIMP PRKCA LILRA2 CX3CL1 TRIM5 CARD16 CACTIN CD36 LTF SASH1 CD55 SIGIRR TRIB1 THEMIS2 HCK FCER1G LY96 LAPTM5 SPI1 ARRB2 OSCAR LY86 IL17RA LRRC25 NCF2 ITGAX CTSS LILRB3 CYTH4 CFP LILRA2 FGR WAS FMNL1 ALOX5 PILRA HCLS1 SIGLEC9 GPSM3 C10ORF54 AOAH EVI2B PLCB2 IGSF6 ARHGAP30 TNFRSF1B CD53 APOBR MYO1F PLBD1 NFAM1 ARAP1 ARHGAP27 C5AR1 TYROBP STX11 NC…	0.0154774	#440154	0.5	0	12	1.40515
4200	10.6536	-1.35079	Cluster 10	Negative Regulation Of T Cell Cytokine Production (GO:0002725)	IFNA2 XCL1 TBX21 HFE IFNB1 LILRB4 SMAD7 HLA-F LILRB4 IFNB1 SMAD7 MMP19 NINJ1 ICAM1 CCR5 SLAMF7 IL10 DHX58 IL1RN GPR84 PLAUR SLC15A3 SIGLEC1 IL27 TRAF1 CD68 MSC OASL RNF19B TNIP3 TNF SPHK1 CTSZ NIPAL4 AMPD3 RAB7B CCRL2 SOCS1 CD274 SQRDL ZC3H12A LILRB5 LILRB2 PILRA ACOD1 EHD1 PFKFB3 CD40 NEURL3 FTL GPR132 SOCS3 IL10RA SLC2A6 CD163 IFIT3 LGMN EMILIN2 TNFAIP8 TNIP1 NFKB2 TBX21 PIK3R5 XCL1 SOD2 CTSB C…	1.98222e-11	#aec7e8	0.5	0	12	5.85142		41	8.17081	-0.799193	Cluster 0	Regulation Of Leukocyte Proliferation (GO:0070663)	HHEX CSF2 GSTP1 IL5RA CSF2RA CSF2RB JAK2 CSF2RB LYN JAK2 TLR8 NCF2 HCK CSF2RA PTAFR P2RY13 MYO1F FPR2 ITGAX THEMIS2 LILRB3 TLR1 EVI2B CLEC7A TNFRSF10C NFAM1 RNF149 MNDA CTSS FPR1 TLR2 HHEX ADGRE2 CPPED1 C10ORF54 LRRC25 DOCK8 FAM65B SIRPB1 LILRA6 LILRA2 FGL2 MEFV GLT1D1 MXD1 LILRA5 CYTH4 ARRB2 RASGRP4 TMEM154 VNN2 HCLS1 CFP SIRPB2 IL17RA APBB1IP IRF1 SMAP2 APOBR NCF4 CLEC4E JAML ARHGAP25 AOAH CXCR…	5.83206e-08	#440154	0.5	0	12	4.11709		41	8.17081	-0.799193	Cluster 0	Regulation Of Leukocyte Proliferation (GO:0070663)	HHEX CSF2 GSTP1 IL5RA CSF2RA CSF2RB JAK2 CSF2RB LYN JAK2 TLR8 NCF2 HCK CSF2RA PTAFR P2RY13 MYO1F FPR2 ITGAX THEMIS2 LILRB3 TLR1 EVI2B CLEC7A TNFRSF10C NFAM1 RNF149 MNDA CTSS FPR1 TLR2 HHEX ADGRE2 CPPED1 C10ORF54 LRRC25 DOCK8 FAM65B SIRPB1 LILRA6 LILRA2 FGL2 MEFV GLT1D1 MXD1 LILRA5 CYTH4 ARRB2 RASGRP4 TMEM154 VNN2 HCLS1 CFP SIRPB2 IL17RA APBB1IP IRF1 SMAP2 APOBR NCF4 CLEC4E JAML ARHGAP25 AOAH CXCR…	0.000402515	#440154	0.5	0	12	2.19761
4201	10.6543	-0.483727	Cluster 10	Macrophage Chemotaxis (GO:0048246)	EDN2 LGALS3 EDNRB TAFA4 SFTPD CCL5 CCL3 CCL2 SAA1 KLF5 CXCL17 LGALS3 CCL3 CXCL17 SQRDL CTSH KLF5 SLC44A4 CCL2 TSPAN1 ICAM1 ELF3 WFDC2 MMP19 CTSZ AQP3 CCL3L3 SCPEP1 GPR84 CLDN23 PLAUR SPSB1 CD68 CCR5 SCGB3A1 CCL5 FXYD3 NPC2 SFTPD MS4A8 C1QC TMBIM1 AMPD3 CYP4B1 IER3 AGR3 SRC TNIP1 C1QA FCGRT MSC FAM3D TJP3 LILRB4 ZC3H12A CDKN2B CXCL3 PFKFB3 SCNN1B DHRS9 C15ORF48 CEBPB CTSB SDC4 FLVCR2 SPHK1 SAA1 C2…	9.06174e-06	#aec7e8	0.5	0	12	3.02139		42	8.69365	-1.42469	Cluster 0	Regulation Of Leukocyte Migration (GO:0002685)	ANXA1 TNFSF18 NCKAP1L CD81 MIA3 VEGFA BST1 HMOX1 TNFRSF18 MADCAM1 RAC2 HOXA7 ZP3 MAN2B1 LAPTM5 PLEKHO2 MGAT1 MYO9B NCKAP1L GNAI2 LGALS9 GRN TCIRG1 ARAP1 HCLS1 SPI1 RIN3 RAC2 PPP1R18 EMILIN2 OSCAR PPM1M HCK TNFRSF1B LSP1 SLC15A3 CD53 THEMIS2 EFHD2 FCGRT HMOX1 ARRB2 HLA.A PIK3R5 TGFB1 PILRA WAS STAT6 TPP1 CD4 CYTH4 CYBA CCR1 PLCB2 STXBP2 CTSZ SIGLEC9 CD68 APOBR PTPN6 GPSM3 TNFRSF14 UNC93B1 AOAH ELF…	3.38354e-07	#440154	0.5	0	12	3.73531		42	8.69365	-1.42469	Cluster 0	Regulation Of Leukocyte Migration (GO:0002685)	ANXA1 TNFSF18 NCKAP1L CD81 MIA3 VEGFA BST1 HMOX1 TNFRSF18 MADCAM1 RAC2 HOXA7 ZP3 MAN2B1 LAPTM5 PLEKHO2 MGAT1 MYO9B NCKAP1L GNAI2 LGALS9 GRN TCIRG1 ARAP1 HCLS1 SPI1 RIN3 RAC2 PPP1R18 EMILIN2 OSCAR PPM1M HCK TNFRSF1B LSP1 SLC15A3 CD53 THEMIS2 EFHD2 FCGRT HMOX1 ARRB2 HLA.A PIK3R5 TGFB1 PILRA WAS STAT6 TPP1 CD4 CYTH4 CYBA CCR1 PLCB2 STXBP2 CTSZ SIGLEC9 CD68 APOBR PTPN6 GPSM3 TNFRSF14 UNC93B1 AOAH ELF…	0.00303592	#440154	0.5	0	12	1.75885
4202	10.875	-0.974234	Cluster 10	Diol Metabolic Process (GO:0034311)	NAAA SPHK2 SPHK1 DEGS2 PLPP3 SGPP2 PRKG2 PLPP2 SGPP1 PLPP1 SGPP2 SPHK1 NAAA DEGS2 PLPP2 PLPP1 ICAM1 SPHK2 MMP19 SQRDL METRNL AMPD3 PRKG2 MSC FCGRT EHD1 SRC TNIP1 CTSZ BCL3 SGPP1 PLPP3 LILRB4 NIPAL4 SPSB1 NINJ1 NBL1 ZC3H12A IER3 C1QA DRAM1 IL10 CD40 SLC2A6 CLDN23 MVP PLAUR GRN CD68 TICAM1 C1QC ANPEP RAB7B ST14 LAMP1 CCL3L3 MFSD7 SLC15A3 LGMN SLC43A2 IL1RN CTSB ADAMDEC1 SLAMF7 RELB TRAF1 FLVCR2 LIL…	7.34674e-07	#aec7e8	0.5	0	12	3.56695		43	8.25825	-0.775025	Cluster 0	Regulation Of Interleukin-23 Production (GO:0032667)	IL17A IL17RA MYD88 CSF2 IFNG RAC1 PLCG2 TLR4 IFNG CSF2 TLR4 IL17RA IL17A NCF2 TLR8 CTSS HCK THEMIS2 TLR2 ARAP1 LILRB3 MYD88 RNF149 ITGAX MYO1F TLR1 CSF2RB NADK ARRB2 FPR2 LYN NFAM1 C10ORF54 P2RY13 AOAH VASP MPEG1 VNN2 FGR EVI2B FMNL1 FPR1 MNDA TNFRSF10C GLT1D1 RASSF5 FGL2 PTAFR SPI1 LRRC25 SMAP2 ARHGAP27 SIGLEC9 APBB1IP C5AR1 AQP9 ADGRE5 NOD2 LILRA1 PLBD1 RASSF2 HCLS1 SIRPB2 APOBR CYBB SIRPB1 CHS…	1.60625e-10	#440154	0.5	0	12	5.39709		43	8.25825	-0.775025	Cluster 0	Regulation Of Interleukin-23 Production (GO:0032667)	IL17A IL17RA MYD88 CSF2 IFNG RAC1 PLCG2 TLR4 IFNG CSF2 TLR4 IL17RA IL17A NCF2 TLR8 CTSS HCK THEMIS2 TLR2 ARAP1 LILRB3 MYD88 RNF149 ITGAX MYO1F TLR1 CSF2RB NADK ARRB2 FPR2 LYN NFAM1 C10ORF54 P2RY13 AOAH VASP MPEG1 VNN2 FGR EVI2B FMNL1 FPR1 MNDA TNFRSF10C GLT1D1 RASSF5 FGL2 PTAFR SPI1 LRRC25 SMAP2 ARHGAP27 SIGLEC9 APBB1IP C5AR1 AQP9 ADGRE5 NOD2 LILRA1 PLBD1 RASSF2 HCLS1 SIRPB2 APOBR CYBB SIRPB1 CHS…	0.0524462	#440154	0.5	0	5	1.14014
4203	10.6057	-0.470281	Cluster 10	Macrophage Migration (GO:1905517)	CCR2 EDN2 LGALS3 EDNRB TAFA4 SFTPD CCL5 CCL3 CCL2 SAA1 KLF5 CXCL17 LGALS3 SQRDL CCL3 CTSH CXCL17 KLF5 SLC44A4 CCL2 CCR5 SCPEP1 CTSZ TSPAN1 ICAM1 CCL5 AQP3 CD68 WFDC2 ELF3 MMP19 GPR84 CCL3L3 FCGRT PLAUR TYMP TMBIM1 TNIP1 UNC93B1 CLDN23 AMPD3 CEBPB SLC15A3 LILRB4 SCGB3A1 SPSB1 BCL3 SFTPD NPC2 DHRS9 MVP S100A11 C1QC FXYD3 MS4A8 GRN ZC3H12A C1QA FLVCR2 AGR3 ANXA11 CYP4B1 FAM3D TOM1 NINJ1 SRC IER3 RAB…	9.03202e-08	#aec7e8	0.5	0	12	4.02211		44	8.79221	-2.28039	Cluster 0	Regulation Of Leukocyte Mediated Cytotoxicity (GO:0001910)	DNASE1 RIPK3 LEP NCR1 NOS2 KLRB1 DNASE1L3 ICAM1 PIK3R6 RIPK3 KLRB1 NCR1 NFKBIA IRF1 TNFRSF14 DNASE1L3 TNIP1 HLA.DRB1 LGALS9 PIK3R6 TAP1 CD40 NOS2 IRF5 HLA.DQB1 CASP5 BCL3 ICAM1 DNASE1 TRAF1 HLA.DPB1 EHD1 SLAMF1 SLC15A3 HLA.A TNFRSF1B LSP1 HLA.DPA1 MVP HLA.E GPR132 LILRB1 IL4I1 CD53 SLAMF7 IRF9 NFKB2 TCIRG1 LCP2 PRKCD SECTM1 HLA.DRB3 ZC3H12A FCGRT TYMP PTPN6 NFKBIE MYO1G LAPTM5 HCLS1 HLA.DMB IL10R…	2.21035e-06	#440154	0.5	0	12	3.32777		44	8.79221	-2.28039	Cluster 0	Regulation Of Leukocyte Mediated Cytotoxicity (GO:0001910)	DNASE1 RIPK3 LEP NCR1 NOS2 KLRB1 DNASE1L3 ICAM1 PIK3R6 RIPK3 KLRB1 NCR1 NFKBIA IRF1 TNFRSF14 DNASE1L3 TNIP1 HLA.DRB1 LGALS9 PIK3R6 TAP1 CD40 NOS2 IRF5 HLA.DQB1 CASP5 BCL3 ICAM1 DNASE1 TRAF1 HLA.DPB1 EHD1 SLAMF1 SLC15A3 HLA.A TNFRSF1B LSP1 HLA.DPA1 MVP HLA.E GPR132 LILRB1 IL4I1 CD53 SLAMF7 IRF9 NFKB2 TCIRG1 LCP2 PRKCD SECTM1 HLA.DRB3 ZC3H12A FCGRT TYMP PTPN6 NFKBIE MYO1G LAPTM5 HCLS1 HLA.DMB IL10R…	0.0449999	#440154	0.5	0	12	1.17339
4204	10.6377	-0.484462	Cluster 10	Regulation Of Natural Killer Cell Mediated Cytotoxicity Directed Against Tumor Cell Target (GO:0002858)	TGFB1 CEACAM1 CRTAM PVR IL12B IL12A NECTIN2 NECTIN2 PVR TNIP1 TGFB1 SDF4 BCL3 OGFR LASP1 SBNO2 MGAT4B MAPKAPK2 WDR1 MGAT1 LRP10 IL12B GRINA EHD1 NUCB1 GRN SRC LAMP1 CHMP4B RAB35 GRAMD1A RAB5C NINJ1 SQRDL CAPNS1 ACTN4 SLC16A3 INF2 MOGS VASP ZDHHC5 CHPF2 ZYX IL12A MVP MYH9 TICAM1 TMBIM1 FURIN TOR4A TMEM8A SPHK1 ABCD1 TRIP10 GNB2 TRIM25 DNM2 AKT1S1 NFKB2 ELF4 GAA FAM129B PTPN1 P4HB SLC4A2 FLII CLPTM…	5.21798e-05	#aec7e8	0.5	0	12	2.64125		45	8.48819	-0.940509	Cluster 0	Regulation Of Leukocyte Chemotaxis (GO:0002688)	LYN CAMK1D EDN2 EDN3 ZNF580 XCL1 PTN PRSS56 SLC8B1 MTUS1 F7 MDK IL6 SLIT2 F2RL1 PTK2B IL6R IL6R LYN ARAP1 HCK NCF2 NADK LILRB3 FMNL1 ITGAX EFHD2 ARRB2 CSF2RB PTK2B TLR8 SMAP2 ADAM8 THEMIS2 MYO1F TLR2 NFAM1 SLC8B1 SPI1 AQP9 TNFRSF1B SECTM1 ARHGAP27 APOBR PRKCD LILRB2 ADGRE5 TCIRG1 IL17RA LITAF ABTB1 GMIP CHST15 GLT1D1 WAS C10ORF54 BCL3 ZDHHC18 STAT6 VASP AP5B1 PIK3R5 CYTH1 PILRA CTSS FGR FPR1 GRK2…	0.000473652	#440154	0.5	0	12	2.16227		45	8.48819	-0.940509	Cluster 0	Regulation Of Leukocyte Chemotaxis (GO:0002688)	LYN CAMK1D EDN2 EDN3 ZNF580 XCL1 PTN PRSS56 SLC8B1 MTUS1 F7 MDK IL6 SLIT2 F2RL1 PTK2B IL6R IL6R LYN ARAP1 HCK NCF2 NADK LILRB3 FMNL1 ITGAX EFHD2 ARRB2 CSF2RB PTK2B TLR8 SMAP2 ADAM8 THEMIS2 MYO1F TLR2 NFAM1 SLC8B1 SPI1 AQP9 TNFRSF1B SECTM1 ARHGAP27 APOBR PRKCD LILRB2 ADGRE5 TCIRG1 IL17RA LITAF ABTB1 GMIP CHST15 GLT1D1 WAS C10ORF54 BCL3 ZDHHC18 STAT6 VASP AP5B1 PIK3R5 CYTH1 PILRA CTSS FGR FPR1 GRK2…	0.403802	#440154	0.5	0	5	0.696916
4205	10.6739	-0.116633	Cluster 10	Regulation Of Lamellipodium Morphogenesis (GO:2000392)	SRC KANK1 PDPN ENPP2 ARPIN RREB1 CORO1B CORO1C CD44 VIL1 SRC KANK1 LAMP1 CTSZ TMBIM1 TNS3 ANPEP CD44 CD68 SPHK1 CTSB RRBP1 GRN MGAT1 SEPP1 C1QC VIL1 FCGRT CORO1B GNS PLCB3 TNIP1 MMP14 TMEM51 RREB1 NUCB1 SQRDL MAN2B1 ICAM1 MVP METRNL TMEM127 CHMP4B LHFPL2 RAB7B MAPK13 MMP19 TMEM63B MGAT4B SLC15A3 CTSL PFKFB3 SDF4 MSC ARHGAP31 ADAMDEC1 CTSD PXDC1 FAM20C CXCL16 PLAUR DRAM1 LILRB4 TJP2 GAA FAM129B CD…	1.98222e-11	#aec7e8	0.5	0	12	5.85142		46	8.79117	-2.07513	Cluster 0	Regulation Of Leukocyte Activation (GO:0002694)	LYN CD74 CD84 PLA2G2A SHPK GPR137B MFHAS1 PJA2 LCK PLSCR1 PLA2G10 GPER1 MYO18A CD200 HLA.DRB1 LAPTM5 CD84 LYN SLC15A3 LGALS9 NCKAP1L PIK3AP1 PIK3R5 CCR5 IL10RA MAN2B1 TNFRSF1B CD53 HCK CD74 CD68 EMILIN2 CTSS LILRB4 LCP1 HCLS1 TNFRSF14 HLA.DPB1 LILRB2 CD4 CCR1 TAP1 SQRDL PILRA LILRB1 DOCK2 NCF2 CECR1 IRF5 HLA.DMB CYTH4 GPR137B CTSZ PLSCR1 CYBB ADGRE2 ITGAX PTPN6 NPL PLEKHO2 CYTH1 RNF19B FGD2 MYO9B…	1.55066e-06	#440154	0.5	0	12	3.40474		46	8.79117	-2.07513	Cluster 0	Regulation Of Leukocyte Activation (GO:0002694)	LYN CD74 CD84 PLA2G2A SHPK GPR137B MFHAS1 PJA2 LCK PLSCR1 PLA2G10 GPER1 MYO18A CD200 HLA.DRB1 LAPTM5 CD84 LYN SLC15A3 LGALS9 NCKAP1L PIK3AP1 PIK3R5 CCR5 IL10RA MAN2B1 TNFRSF1B CD53 HCK CD74 CD68 EMILIN2 CTSS LILRB4 LCP1 HCLS1 TNFRSF14 HLA.DPB1 LILRB2 CD4 CCR1 TAP1 SQRDL PILRA LILRB1 DOCK2 NCF2 CECR1 IRF5 HLA.DMB CYTH4 GPR137B CTSZ PLSCR1 CYBB ADGRE2 ITGAX PTPN6 NPL PLEKHO2 CYTH1 RNF19B FGD2 MYO9B…	0.029166	#440154	0.5	0	12	1.26756
4206	10.6643	-1.11893	Cluster 10	Negative Regulation Of PERK-mediated Unfolded Protein Response (GO:1903898)	PPP1R15B PTPN1 PPP1R15A NCK1 NCK2 PPP1R15A PTPN1 PPP1R15B ZC3H12A CSRNP1 TNFAIP3 NFKBIA NCK2 EHD1 NCK1 ICAM1 TRAF1 NFKB2 RNF19B SOCS3 TNIP1 STX11 RIPK1 IL10RA PFKFB3 NFKB1 TICAM1 PLAUR PIM3 KLF6 PIK3R5 MAPKAPK2 BCL3 RELB ARID5A AMPD3 GADD45B FOSL2 MMP19 JUNB TNF DUSP5 NINJ1 ZFP36 IER3 SLAMF7 GPR132 CD274 IL1RN ELF4 ADORA2A DUSP2 NFKBIZ MAP3K8 IRAK2 SBNO2 MYO9B MSC CCRL2 TNFRSF1B PTGS2 SOCS1 NIPAL…	0.000165914	#aec7e8	0.5	0	12	2.39006		47	8.15129	-2.11927	Cluster 0	Positive Regulation Of Antigen Receptor-Mediated Signaling Pathway (GO:0050857)	PRKCH CARD11 RELA CD81 NFAM1 PRKCB FOXP1 UXT PTPRC LCK SLC39A10 TESPA1 TRAT1 KCNN4 PRKD2 RPS3 CD226 RAB29 IKBKG NECTIN2 ARHGAP45 WIPF1 HCLS1 HLA.E GPSM3 CYTH1 CORO1A AKNA PIK3CD ARHGAP30 IKZF1 PTPRC FMNL1 RASSF5 CDC42SE1 NLRC5 ARHGEF1 CARD11 LAPTM5 CSK WAS SELPLG RASAL3 RAC2 LCP1 CD53 HLA.A HLA.B ITGAL SMAP2 IL16 DOCK8 CD3E ARHGAP25 TBC1D10C GMIP RASGRP2 TMC6 PRKCH ARRB2 FGD3 TMC8 LIMD2 TAGAP JAK…	0.014626	#440154	0.5	0	12	1.41744		47	8.15129	-2.11927	Cluster 0	Positive Regulation Of Antigen Receptor-Mediated Signaling Pathway (GO:0050857)	PRKCH CARD11 RELA CD81 NFAM1 PRKCB FOXP1 UXT PTPRC LCK SLC39A10 TESPA1 TRAT1 KCNN4 PRKD2 RPS3 CD226 RAB29 IKBKG NECTIN2 ARHGAP45 WIPF1 HCLS1 HLA.E GPSM3 CYTH1 CORO1A AKNA PIK3CD ARHGAP30 IKZF1 PTPRC FMNL1 RASSF5 CDC42SE1 NLRC5 ARHGEF1 CARD11 LAPTM5 CSK WAS SELPLG RASAL3 RAC2 LCP1 CD53 HLA.A HLA.B ITGAL SMAP2 IL16 DOCK8 CD3E ARHGAP25 TBC1D10C GMIP RASGRP2 TMC6 PRKCH ARRB2 FGD3 TMC8 LIMD2 TAGAP JAK…	0.189843	#440154	0.5	0	5	0.860802
4207	10.6171	-1.43719	Cluster 10	Positive Regulation Of Lymphocyte Apoptotic Process (GO:0070230)	IL10 PRELID1 LGALS16 PDCD1 IDO1 FNIP1 SLAMF7 IL10 CD274 TRAF1 RNF19B ACOD1 IDO1 IL27 CD40 IL1RN PDCD1 SOCS1 CCR5 ICAM1 ADORA2A DHX58 NEURL3 GBP1 TNIP1 MSC IL15RA NINJ1 TNF LILRB4 CD80 OASL LILRA3 SLAMF1 NFKB2 EHD1 ZC3H12A GPR132 NIPAL4 MMP19 SQRDL TNFSF9 LILRB2 NFKB1 GPR31 CXCL11 SOCS3 PLAUR BCL3 TNFAIP2 CCRL2 RELB FFAR3 CCL3L3 APOL3 DUSP5 IL10RA GPR84 CCL3 SIGLEC1 IFIH1 ISG20 SLC2A6 PIM3 AMPD3 C…	2.8139e-08	#aec7e8	0.5	0	12	4.27535		48	8.62011	-0.64632	Cluster 0	Negative Regulation Of Necroptotic Process (GO:0060546)	CASP8 SLC25A4 FZD9 PELI1 ARHGEF2 YBX3 RIPK1 BIRC2 BIRC3 EHBP1L1 PELI1 ARHGEF2 RIPK1 YBX3 FAM129A CYTH1 MAPKAPK2 TNIP1 LYN MCL1 NCF2 KLF13 PPTC7 ACSL1 ARAP1 SBNO2 RNF19B ELF4 TRIM25 IL10RA PIK3R5 HCK FMNL1 TLR8 STK40 NFKB2 LITAF THEMIS2 SSH2 GBP2 TLR2 MYO9B STX11 BCL3 TNFRSF1B ELL SMAP2 MAP2K3 VASP RNF149 ARHGAP30 HCLS1 TNFAIP2 DOCK2 RAPGEF1 LILRB2 IGF2R ADGRE5 STAT6 WIPF1 CASP8 AP5B1 NOD2 PTPRC T…	6.55473e-06	#440154	0.5	0	12	3.09172		48	8.62011	-0.64632	Cluster 0	Negative Regulation Of Necroptotic Process (GO:0060546)	CASP8 SLC25A4 FZD9 PELI1 ARHGEF2 YBX3 RIPK1 BIRC2 BIRC3 EHBP1L1 PELI1 ARHGEF2 RIPK1 YBX3 FAM129A CYTH1 MAPKAPK2 TNIP1 LYN MCL1 NCF2 KLF13 PPTC7 ACSL1 ARAP1 SBNO2 RNF19B ELF4 TRIM25 IL10RA PIK3R5 HCK FMNL1 TLR8 STK40 NFKB2 LITAF THEMIS2 SSH2 GBP2 TLR2 MYO9B STX11 BCL3 TNFRSF1B ELL SMAP2 MAP2K3 VASP RNF149 ARHGAP30 HCLS1 TNFAIP2 DOCK2 RAPGEF1 LILRB2 IGF2R ADGRE5 STAT6 WIPF1 CASP8 AP5B1 NOD2 PTPRC T…	0.0267836	#440154	0.5	0	12	1.28607
4208	10.8213	-1.21901	Cluster 10	Response To Glucocorticoid (GO:0051384)	ANXA1 IL10 GOT1 HSD3B1 HSD3B2 SSTR2 ISL1 SSTR4 SSTR5 IL6 REST IL1RN PDCD7 HNRNPU ZFP36L1 FAM107A TNF NR3C1 UBE2L3 ZFP36L2 GHRHR BCL2L11 CALCR ZFP36 SLIT2 SLIT1 TNF IL10 IL1RN IL27 SLAMF7 SOCS3 TRAF1 ICAM1 ZC3H12A ACOD1 IL6 MMP19 RNF19B PFKFB3 SOCS1 NIPAL4 CD274 FFAR3 EHD1 DHX58 SLAMF1 SOD2 PLAUR NFKB1 PTGS2 OASL GPR132 AMPD3 CD40 IL1B TNIP3 TNIP1 GPR84 CCL3L3 MSC IER3 CCRL2 ADORA2A TNFSF9 NFKB2 S…	0.000165914	#aec7e8	0.5	0	12	2.39006		49	8.58449	-1.52771	Cluster 0	Negative Regulation Of Natural Killer Cell Mediated Immunity (GO:0002716)	CLEC12B LILRB1 KLRD1 KLRC1 LGALS9 HLA-G MICA KIR2DL4 HLA-E HLA-F LILRB1 LGALS9 AOAH LILRB2 HCK TNFRSF1B HCLS1 ITGAX LAPTM5 CYTH4 THEMIS2 CLEC12B CD53 KLRD1 HLA.E FGR LYN SIGLEC9 TLR2 OSCAR PTPN6 ADGRE2 PILRA MX2 LILRA6 PSTPIP1 ARRB2 ADCY7 WAS LILRB3 CTSS SPI1 PIK3R5 GPSM3 TCIRG1 KLRC1 NCKAP1L FMNL1 TYMP NOD2 PLCB2 NCF2 IL10RA LCP1 ARHGAP30 DOCK2 APOBR MPEG1 MYO1F RIN3 LILRA5 RASSF5 CCR1 TLR8 IRF1…	1.40977e-09	#440154	0.5	0	12	4.92543		49	8.58449	-1.52771	Cluster 0	Negative Regulation Of Natural Killer Cell Mediated Immunity (GO:0002716)	CLEC12B LILRB1 KLRD1 KLRC1 LGALS9 HLA-G MICA KIR2DL4 HLA-E HLA-F LILRB1 LGALS9 AOAH LILRB2 HCK TNFRSF1B HCLS1 ITGAX LAPTM5 CYTH4 THEMIS2 CLEC12B CD53 KLRD1 HLA.E FGR LYN SIGLEC9 TLR2 OSCAR PTPN6 ADGRE2 PILRA MX2 LILRA6 PSTPIP1 ARRB2 ADCY7 WAS LILRB3 CTSS SPI1 PIK3R5 GPSM3 TCIRG1 KLRC1 NCKAP1L FMNL1 TYMP NOD2 PLCB2 NCF2 IL10RA LCP1 ARHGAP30 DOCK2 APOBR MPEG1 MYO1F RIN3 LILRA5 RASSF5 CCR1 TLR8 IRF1…	0.171587	#440154	0.5	0	5	0.882757
4209	10.2776	-1.04051	Cluster 10	Regulation Of Leukocyte Adhesion To Vascular Endothelial Cell (GO:1904994)	FUT7 ITGB2 RHOA RELA MDK FUT9 NFAT5 IL6 ZDHHC21 TRAF6 IRAK1 TNF TNF IL6 LILRB2 RNF19B ZC3H12A EHD1 ICAM1 TNIP1 ITGB2 PIK3R5 TNFRSF1B NFKB2 PILRA PLAUR OSCAR TRAF1 NINJ1 BCL3 IL1B AMPD3 SIGLEC9 PFKFB3 TNFAIP2 GPR84 HCK ADORA2A NFKB1 MAN2B1 TLR2 ELF4 SOCS3 SBNO2 CLCF1 CXCL3 HELZ2 TICAM1 IER3 GRAMD1A STX11 SRC TRIM25 ADGRE2 SLC15A3 CCR5 OGFR PTGS2 MYO9B IL27 LILRB3 IL1RN NCF2 SLAMF7 EMILIN2 MMP19 IL…	1.3006e-10	#aec7e8	0.5	0	12	5.44293		50	8.75402	-1.59929	Cluster 0	Negative Regulation Of Natural Killer Cell Mediated Cytotoxicity (GO:0045953)	TGFB1 SERPINB4 CLEC12B LILRB1 HLA-A HLA-B HLA-G SERPINB9 KIR2DL4 HLA-E HLA-F CEACAM1 KLRD1 KLRC1 LGALS9 MICA LGALS9 HCK TNFRSF1B LILRB2 LILRB1 HCLS1 LAPTM5 AOAH ITGAX HLA.E THEMIS2 WAS FMNL1 SPI1 FGR APOBR ARRB2 GPSM3 CYTH4 TCIRG1 OSCAR LILRB3 PTPN6 PIK3R5 SIGLEC9 RIN3 PILRA LYN PLCB2 NOD2 TGFB1 ARHGAP30 MYO1F CD53 TLR2 EFHD2 LILRA6 PSTPIP1 GMIP TYMP ARAP1 ARHGAP27 LRRC25 NCF2 RASSF5 LSP1 CORO1A …	2.09221e-07	#440154	0.5	0	12	3.8397		50	8.75402	-1.59929	Cluster 0	Negative Regulation Of Natural Killer Cell Mediated Cytotoxicity (GO:0045953)	TGFB1 SERPINB4 CLEC12B LILRB1 HLA-A HLA-B HLA-G SERPINB9 KIR2DL4 HLA-E HLA-F CEACAM1 KLRD1 KLRC1 LGALS9 MICA LGALS9 HCK TNFRSF1B LILRB2 LILRB1 HCLS1 LAPTM5 AOAH ITGAX HLA.E THEMIS2 WAS FMNL1 SPI1 FGR APOBR ARRB2 GPSM3 CYTH4 TCIRG1 OSCAR LILRB3 PTPN6 PIK3R5 SIGLEC9 RIN3 PILRA LYN PLCB2 NOD2 TGFB1 ARHGAP30 MYO1F CD53 TLR2 EFHD2 LILRA6 PSTPIP1 GMIP TYMP ARAP1 ARHGAP27 LRRC25 NCF2 RASSF5 LSP1 CORO1A …	0.0651359	#440154	0.5	0	5	1.09309
4210	10.5254	-0.884832	Cluster 10	Response To Cholesterol (GO:0070723)	TGFB1 CES1 GPLD1 GRAMD1C SMAD2 GRAMD1B GRAMD1A OSBPL7 LRP6 PTCH1 CYP7A1 TGFBR1 TGFBR2 MYL1 PMVK SMO CCL3 CCR5 GRAMD1A CCR5 TNIP1 BCL3 NINJ1 SBNO2 TNFRSF1B FCGRT TOM1 SLC15A3 SRC CTSZ EHD1 ADORA2A LILRB2 ARHGEF11 AMPD3 MMP19 TRAF1 PFKFB3 OGFR CCL3 ARHGEF10L ICAM1 PILRA PIK3R5 UNC93B1 NFKB2 MGAT1 RNF19B LILRB4 MAN2B1 SIGLEC1 MSC PLEKHM2 ZC3H12A MYO9B SOD2 CEBPB TNFAIP2 RAPGEF1 CD68 TYMP SLC43A2 CES…	2.8139e-08	#aec7e8	0.5	0	12	4.27535		51	8.64666	-1.26597	Cluster 0	Negative Regulation Of Myeloid Leukocyte Mediated Immunity (GO:0002887)	SPI1 CD84 CD300A CX3CR1 LGALS9 SPI1 LGALS9 HCK LAPTM5 WAS FGR ARRB2 ITGAX APOBR THEMIS2 PLCB2 GPSM3 OSCAR CYTH4 MYO1F SIGLEC9 PILRA EFHD2 ARAP1 LRRC25 PLEKHO2 LILRB3 TCIRG1 NCF2 HLA.E FMNL1 GMIP HCLS1 TNFRSF1B NFAM1 C10ORF54 ARHGAP30 ADAM8 SLC15A3 PIK3R5 C5AR1 HK3 LSP1 PTPN6 CCR1 CTSS RIN3 NCKAP1L AOAH RHOG LILRB2 TYMP IL17RA RPS6KA1 PTAFR NCF4 HLA.B TBXAS1 TLR2 NCF1 TYROBP LYN MAN2B1 NCF1B MYO9B…	1.1176e-07	#440154	0.5	0	12	3.97586		51	8.64666	-1.26597	Cluster 0	Negative Regulation Of Myeloid Leukocyte Mediated Immunity (GO:0002887)	SPI1 CD84 CD300A CX3CR1 LGALS9 SPI1 LGALS9 HCK LAPTM5 WAS FGR ARRB2 ITGAX APOBR THEMIS2 PLCB2 GPSM3 OSCAR CYTH4 MYO1F SIGLEC9 PILRA EFHD2 ARAP1 LRRC25 PLEKHO2 LILRB3 TCIRG1 NCF2 HLA.E FMNL1 GMIP HCLS1 TNFRSF1B NFAM1 C10ORF54 ARHGAP30 ADAM8 SLC15A3 PIK3R5 C5AR1 HK3 LSP1 PTPN6 CCR1 CTSS RIN3 NCKAP1L AOAH RHOG LILRB2 TYMP IL17RA RPS6KA1 PTAFR NCF4 HLA.B TBXAS1 TLR2 NCF1 TYROBP LYN MAN2B1 NCF1B MYO9B…	0.00122408	#440154	0.5	0	12	1.95609
4211	10.8005	-1.08065	Cluster 10	Regulation Of Monooxygenase Activity (GO:0032768)	IL1A IL1B POR NOS1AP DDAH2 ZDHHC21 GDNF DDAH1 LEP HM13 EGFR SNCA IL1B IL1A CXCL3 SERPINB2 IRAK2 OLR1 AC013444.1 PLAUR NOS1AP IER3 SRC POR PTGS2 CXCL8 PFKFB3 HM13 EGFR GDNF GPR84 LEP G0S2 DDAH1 DDAH2 TNF ACSL1 IL6 ZDHHC21 SPHK1 GRINA SOD2 SLC2A6 CCRL2 PXDC1 NLRP3 PLD3 MGLL ZC3H12A ARHGEF10L ANXA5 CXCL2 TNIP1 SLC43A2 EHD1 CEBPB SNCA PLIN1 OSGIN1 MMP19 CLEC5A PC TOM1 DENND5A NINJ1 SIRPA METRNL ICAM1…	3.24466e-08	#aec7e8	0.5	0	12	4.24442		52	8.16623	-0.321325	Cluster 0	Positive Regulation Of Aspartic-Type Endopeptidase Activity Involved In Amyloid Precursor Protein Catabolic Process (GO:1902961)	PICALM EFNA1 LYN EFNA3 ROCK2 EPHA4 PICALM ROCK2 LYN IGF2R EFNA1 CHST15 TLR8 EFNA3 NCF2 TLR4 LRRK2 MXD1 RNF149 TLR1 EPHA4 OGFRL1 NAMPT KDM7A ACTR2 SMCHD1 CSF2RB FGL2 CTSS IL13RA1 BACH1 TLR2 AQP9 RASSF2 VNN2 PTPRJ MNDA FAM129A ARAP1 SSH2 GLT1D1 HCK PLXNC1 FPR2 N4BP1 TNFRSF10C SORL1 ACSL1 MCL1 TMEM127 P2RY13 IQGAP1 CPPED1 NADK SLC6A6 SP1 PBX2 VASP LITAF TLN1 ITGAX DENND5A CR1 XPO6 WDR26 PPP3R1 LILRB…	1.13887e-14	#440154	0.5	0	12	7.47176		52	8.16623	-0.321325	Cluster 0	Positive Regulation Of Aspartic-Type Endopeptidase Activity Involved In Amyloid Precursor Protein Catabolic Process (GO:1902961)	PICALM EFNA1 LYN EFNA3 ROCK2 EPHA4 PICALM ROCK2 LYN IGF2R EFNA1 CHST15 TLR8 EFNA3 NCF2 TLR4 LRRK2 MXD1 RNF149 TLR1 EPHA4 OGFRL1 NAMPT KDM7A ACTR2 SMCHD1 CSF2RB FGL2 CTSS IL13RA1 BACH1 TLR2 AQP9 RASSF2 VNN2 PTPRJ MNDA FAM129A ARAP1 SSH2 GLT1D1 HCK PLXNC1 FPR2 N4BP1 TNFRSF10C SORL1 ACSL1 MCL1 TMEM127 P2RY13 IQGAP1 CPPED1 NADK SLC6A6 SP1 PBX2 VASP LITAF TLN1 ITGAX DENND5A CR1 XPO6 WDR26 PPP3R1 LILRB…	0.257333	#440154	0.5	0	5	0.794752
4212	10.53	-1.23011	Cluster 10	Positive Regulation Of Tyrosine Phosphorylation Of STAT Protein (GO:0042531)	LYN IL15 LIF OSM CSHL1 IL18 TNFRSF1A IL3 VEGFA GH1 IL2 CRLF1 IL4 GH2 IL6 IL23A IFNG IL31RA CLCF1 IL6ST EPO CD40 CNTF CSF2 TNF IFNL1 GHR ERBB4 TNFRSF18 HES1 HES5 TNFSF18 TSLP IGF1 PTK6 PARP14 PARP9 KIT HCLS1 FGFR3 CSF1R IL20 IL21 IFNA2 FLT3 CTF1 IL23R CSH2 CSH1 CCL5 IL12B PIBF1 IL12A IL6R JAK2 CD274 RNF19B TNIP1 ZC3H12A LILRB2 TRAF1 ICAM1 NINJ1 NFKB1 SLAMF7 BCL3 TNFAIP2 TNFRSF1B PILRA DHX58 TNF GB…	5.22777e-06	#aec7e8	0.5	0	12	3.14084		53	8.20007	-0.992184	Cluster 0	Regulation Of Intracellular Protein Transport (GO:0033157)	TGFB1 PTPN1 ATP13A2 MBD1 PLK3 B3GAT3 CEP131 SIRT7 PTPN14 BMP4 LCP1 IFI27 RUFY3 VAMP2 KIF20B ERGIC3 TENM1 GSK3B RIPOR1 ICE1 ZFAND1 PRR5L GCC2 OAZ1 OAZ2 UHMK1 FRAT1 PDCD10 FRAT2 TPR SH3TC2 NDEL1 RAB29 CEP290 PCNT BCAS3 FMNL1 VASP XPO6 ZDHHC18 NBEAL2 TGFB1 ABTB1 ADAM8 ARAP1 GRK2 SMAP2 R3HDM4 GRK6 NADK GMIP ELF4 MYO1F EFHD2 ARHGAP45 ADGRE5 C10ORF54 GNAI2 ARRB2 CYTH1 C7ORF43 FRAT1 GPSM3 WAS NFAM1 PPP1…	0.253901	#440154	0.5	0	5	0.797668		53	8.20007	-0.992184	Cluster 0	Regulation Of Intracellular Protein Transport (GO:0033157)	TGFB1 PTPN1 ATP13A2 MBD1 PLK3 B3GAT3 CEP131 SIRT7 PTPN14 BMP4 LCP1 IFI27 RUFY3 VAMP2 KIF20B ERGIC3 TENM1 GSK3B RIPOR1 ICE1 ZFAND1 PRR5L GCC2 OAZ1 OAZ2 UHMK1 FRAT1 PDCD10 FRAT2 TPR SH3TC2 NDEL1 RAB29 CEP290 PCNT BCAS3 FMNL1 VASP XPO6 ZDHHC18 NBEAL2 TGFB1 ABTB1 ADAM8 ARAP1 GRK2 SMAP2 R3HDM4 GRK6 NADK GMIP ELF4 MYO1F EFHD2 ARHGAP45 ADGRE5 C10ORF54 GNAI2 ARRB2 CYTH1 C7ORF43 FRAT1 GPSM3 WAS NFAM1 PPP1…	0.122109	#440154	0.5	0	5	0.956626
4213	10.7666	-1.23571	Cluster 10	Positive Regulation Of Unsaturated Fatty Acid Biosynthetic Process (GO:2001280)	IL1B CD74 ANXA1 PLA2G3 ABCD2 PTGS2 PTGS2 IL1B CXCL8 PLAUR CXCL3 TNF ZC3H12A TRAF1 GPR84 IL1A ICAM1 SERPINB2 PFKFB3 NFKB1 IRAK2 SOCS3 ANXA1 AMPD3 RNF19B TNIP1 CCRL2 EHD1 CD74 MAP3K8 IER3 IL1RN SLAMF7 STX11 LILRB2 SLC2A6 ADORA2A NLRP3 HLA.DRB1 AC013444.1 MMP19 IL10 NFKB2 PIK3R5 BCL3 HCAR2 OLR1 TNFAIP2 SQRDL NINJ1 TNFAIP8 CCR5 CD274 MSC SOD2 GPR132 IL27 IL6 ACOD1 TICAM1 DHX58 TNFRSF1B OASL PLEK RP11…	1.3006e-10	#aec7e8	0.5	0	12	5.44293		54	9.07702	-1.16662	Cluster 0	Regulation Of Interleukin-8 Production (GO:0032677)	CD74 ANXA1 IL10 ANXA4 DEFA5 APOA2 TLR2 IL1B CD2 TLR1 PTPRC IL6 LEP BCL3 HSPA1A TLR9 TLR8 TLR7 TLR6 TLR5 CHI3L1 TLR4 CD244 TLR3 CNTN1 HSPA1B FCN1 RAB1A RELA SERPINE1 OTUD7B PTPN22 NOD1 EHHADH PARK7 HMGB1 NOD2 TNF PYCARD CLEC7A FADD RIPK1 CD33 ELANE MAP2K5 AFAP1L2 F2R SYK ZNF580 STAT3 PRG3 TIRAP GDF2 SSC5D KLF4 MYD88 MAVS NLRP10 F2RL1 DDIT3 IL17F BPI PRKD2 CACTIN LAMTOR5 IL17D RIGI CRP PLA2G1B MAPK…	6.78739e-05	#440154	0.5	0	12	2.58415		54	9.07702	-1.16662	Cluster 0	Regulation Of Interleukin-8 Production (GO:0032677)	CD74 ANXA1 IL10 ANXA4 DEFA5 APOA2 TLR2 IL1B CD2 TLR1 PTPRC IL6 LEP BCL3 HSPA1A TLR9 TLR8 TLR7 TLR6 TLR5 CHI3L1 TLR4 CD244 TLR3 CNTN1 HSPA1B FCN1 RAB1A RELA SERPINE1 OTUD7B PTPN22 NOD1 EHHADH PARK7 HMGB1 NOD2 TNF PYCARD CLEC7A FADD RIPK1 CD33 ELANE MAP2K5 AFAP1L2 F2R SYK ZNF580 STAT3 PRG3 TIRAP GDF2 SSC5D KLF4 MYD88 MAVS NLRP10 F2RL1 DDIT3 IL17F BPI PRKD2 CACTIN LAMTOR5 IL17D RIGI CRP PLA2G1B MAPK…	0.291469	#440154	0.5	0	5	0.767704
4214	10.89	-0.751799	Cluster 10	Positive Regulation Of Vascular Associated Smooth Muscle Cell Migration (GO:1904754)	DOCK7 NR4A3 DOCK5 DOCK4 FGF9 IGFBP5 PDGFB DOCK4 PDGFB NR4A3 DOCK7 PFKFB3 SOD2 DOCK5 IGFBP5 ARHGAP31 FGF9 ICAM1 MMP19 SOCS3 AMPD3 WDFY3 PLAUR FNDC3B PTGS2 DRAM1 RNF19B IER3 FNIP2 IRAK2 SPSB1 IL1RN ARHGEF11 DENND5A TNFAIP2 FOSL2 TNF CRIM1 SIRPA SLAMF7 SPHK1 PLXND1 CCR5 LILRB4 CCRL2 GPR84 LAMA4 NINJ1 CYFIP1 CFLAR CD274 KCTD12 C1QC STAB1 ZC3H12A SERPINB2 LHFPL2 LRP1 LACTB EPAS1 IL1B NRP2 CSF1R IL10 B…	5.04534e-08	#aec7e8	0.5	0	12	4.14855		55	9.17673	-1.25628	Cluster 0	Regulation Of Interleukin-6 Production (GO:0032675)	CD74 WNT5A POU2AF1 TYROBP ISL1 EREG MAPK13 SELENOS MAPKAPK2 TNFSF4 LEP PTPN6 CD200 SLAMF1 APP CD84 NOD2 TNF PYCARD GHSR IL17RA XBP1 F2R NCKAP1L TSLP TIRAP NMBR CYBA HLA-B MYD88 MAVS RIGI EOLA1 C5AR2 BCL10 TWIST1 GBA1 AGER C1QTNF4 C1QTNF3 ZC3H12A SIRPA PLCG2 LGALS9 IL6R AKIRIN2 SIGLEC16 POU2F2 IL10 NMB MMP8 IL16 CARD9 SPHK2 PTPN11 LILRB2 LILRB4 CD200R1 IL1A TLR2 IL1B TLR1 IL6 ELF4 LCP1 IFNG TLR9 A…	5.50547e-07	#440154	0.5	0	12	3.6296		55	9.17673	-1.25628	Cluster 0	Regulation Of Interleukin-6 Production (GO:0032675)	CD74 WNT5A POU2AF1 TYROBP ISL1 EREG MAPK13 SELENOS MAPKAPK2 TNFSF4 LEP PTPN6 CD200 SLAMF1 APP CD84 NOD2 TNF PYCARD GHSR IL17RA XBP1 F2R NCKAP1L TSLP TIRAP NMBR CYBA HLA-B MYD88 MAVS RIGI EOLA1 C5AR2 BCL10 TWIST1 GBA1 AGER C1QTNF4 C1QTNF3 ZC3H12A SIRPA PLCG2 LGALS9 IL6R AKIRIN2 SIGLEC16 POU2F2 IL10 NMB MMP8 IL16 CARD9 SPHK2 PTPN11 LILRB2 LILRB4 CD200R1 IL1A TLR2 IL1B TLR1 IL6 ELF4 LCP1 IFNG TLR9 A…	0.509096	#440154	0.5	0	5	0.6466
4215	11.004	-0.318992	Cluster 10	Negative Regulation Of G1/S Transition Of Mitotic Cell Cycle (GO:2000134)	MYO16 PRMT2 PLK3 INHBA KLF4 WEE1 DLG1 RBL1 SLFN11 GFI1B RBL2 APC TFDP3 CDK2AP2 ZNF655 CRLF3 KANK2 RB1 CDKN1A FHL1 DCUN1D3 FAM107A PTEN JADE1 CDC73 PKD2 GPNMB NACC2 CCL2 BRD7 E2F7 DACT1 PKD2 RB1 ARHGAP31 TLN1 NEK7 INHBA CDC73 CDKN1A BACH1 EPG5 LRP1 ATP13A3 DDR2 ZNF655 WEE1 SNX18 OGFRL1 NR3C1 AKAP2 KANK2 MBNL1 RHOQ MACF1 DRAM1 SLFN11 ATP2B4 FOSL2 HIPK3 NOTCH2 FBN1 USP12 GPNMB SSH1 TACC1 MYLK PCNX1 …	2.33239e-10	#aec7e8	0.5	0	12	5.3161		56	9.80095	-1.02428	Cluster 0	Regulation Of Interleukin-5 Production (GO:0032674)	LEF1 IFNL1 TNFRSF21 PRKCZ IL9 IFNA2 TSLP PDE4D RARA GATA3 LILRB4 LGALS9 LGALS9 RARA BCL3 OGFR SBNO2 LILRB4 LILRB2 NINJ1 OSCAR TYMP EHD1 TNFRSF1B GRN PILRA UNC93B1 SLC15A3 TNIP1 FBRS CD4 MAN2B1 SIGLEC1 HELZ2 GRINA CTSZ PIK3R5 RNF19B RELB ZMYND15 MGAT1 HCK IL10RA MAPKAPK2 ZC3H12A NFKB2 DHX58 SIRPA CD68 TRIM25 SQRDL TCIRG1 PARP10 EFHD2 ARAP1 SPI1 SIGLEC9 TNFAIP2 PIM3 LILRB3 TICAM1 GRAMD1A TOM1 LRCH4…	9.77478e-07	#440154	0.5	0	12	3.50495		56	9.80095	-1.02428	Cluster 0	Regulation Of Interleukin-5 Production (GO:0032674)	LEF1 IFNL1 TNFRSF21 PRKCZ IL9 IFNA2 TSLP PDE4D RARA GATA3 LILRB4 LGALS9 LGALS9 RARA BCL3 OGFR SBNO2 LILRB4 LILRB2 NINJ1 OSCAR TYMP EHD1 TNFRSF1B GRN PILRA UNC93B1 SLC15A3 TNIP1 FBRS CD4 MAN2B1 SIGLEC1 HELZ2 GRINA CTSZ PIK3R5 RNF19B RELB ZMYND15 MGAT1 HCK IL10RA MAPKAPK2 ZC3H12A NFKB2 DHX58 SIRPA CD68 TRIM25 SQRDL TCIRG1 PARP10 EFHD2 ARAP1 SPI1 SIGLEC9 TNFAIP2 PIM3 LILRB3 TICAM1 GRAMD1A TOM1 LRCH4…	0.542494	#440154	0.5	0	5	0.632803
4216	10.0003	-1.20903	Cluster 10	Positive Regulation Of Lipid Localization (GO:1905954)	ZC3H12A LCP1 HILPDA LRP1 PLA2G10 PLIN5 NFKB1 VSTM2A IKBKE C3 NFKB1 ZC3H12A TNIP1 NFKB2 TNFRSF1B PFKFB3 TRAF1 NINJ1 PIK3R5 RNF19B LILRB2 TNFAIP2 BCL3 ICAM1 SLC15A3 AMPD3 ACSL1 IL10RA TLR2 RELB HCK SQRDL SLC43A2 MYO9B PILRA CCR5 GPR84 SBNO2 EHD1 PIK3AP1 IKBKE MAN2B1 LILRB1 LCP1 TICAM1 IRAK2 PLAUR ADGRE2 STX11 EMILIN2 LAPTM5 ZNFX1 ITGAX SIRPA ADORA2A TYMP MGAT1 ARAP1 SOD2 CEBPB TNF GPR132 LILRB4 LYN…	3.00971e-09	#aec7e8	0.5	0	12	4.76074		57	8.34985	-1.20908	Cluster 0	Regulation Of Leukocyte Degranulation (GO:0043300)	C12ORF4 LYN UNC13D FES FER SYK STXBP2 STXBP2 LYN UNC13D SYK FMNL1 WAS MYO1F HCK PLCB2 THEMIS2 SPI1 C10ORF54 GPSM3 LRRC25 ARRB2 CFP ARAP1 NCF2 NFAM1 FGR HCLS1 APOBR LILRB3 PTPN6 ARHGAP30 ALOX5 FES ADAM8 LAPTM5 ARHGAP45 CSF2RB IL17RA DOK3 NCF4 CYTH4 ITGAX RIN3 NCF1B GMIP PARVG ADGRE5 ARHGAP4 NCF1 GRK2 TCIRG1 ARHGAP27 LSP1 LCP1 NADK OSCAR VASP SMAP2 CORO1A PTAFR HLA.E ICAM3 NBEAL2 ABTB1 SIRPB1 AOAH …	5.44738e-07	#440154	0.5	0	12	3.63191		57	8.34985	-1.20908	Cluster 0	Regulation Of Leukocyte Degranulation (GO:0043300)	C12ORF4 LYN UNC13D FES FER SYK STXBP2 STXBP2 LYN UNC13D SYK FMNL1 WAS MYO1F HCK PLCB2 THEMIS2 SPI1 C10ORF54 GPSM3 LRRC25 ARRB2 CFP ARAP1 NCF2 NFAM1 FGR HCLS1 APOBR LILRB3 PTPN6 ARHGAP30 ALOX5 FES ADAM8 LAPTM5 ARHGAP45 CSF2RB IL17RA DOK3 NCF4 CYTH4 ITGAX RIN3 NCF1B GMIP PARVG ADGRE5 ARHGAP4 NCF1 GRK2 TCIRG1 ARHGAP27 LSP1 LCP1 NADK OSCAR VASP SMAP2 CORO1A PTAFR HLA.E ICAM3 NBEAL2 ABTB1 SIRPB1 AOAH …	0.029166	#440154	0.5	0	12	1.26756
4217	10.7687	-0.532251	Cluster 10	Positive Regulation Of Vascular Associated Smooth Muscle Cell Proliferation (GO:1904707)	MEF2D IL10 JUN IGFBP5 MMP2 HTR1B FOXJ2 PDGFB IGF1 MMP9 FGF2 ERN1 NR4A3 P2RY6 GJA1 FGF9 MFN2 LDLRAP1 DNMT1 BMPR1A MAPKAPK2 ICAM1 PFKFB3 PLEKHM2 MMP19 LAMP1 ENG SPHK1 CTSZ PDGFB EHD1 METRNL TRIP10 TNIP1 ZC3H12A BCL3 AMPD3 MGAT1 SPSB1 FOSL2 PLAUR MAN2B1 ARHGAP31 MMP14 SBNO2 GRN EMILIN2 MSC IER3 CD68 TICAM1 SOCS3 SIGLEC1 SLC15A3 NINJ1 DRAM1 GPR84 CTSB CEBPB LILRB4 TOM1 RAB7B PLXND1 MMP9 IL1RN NFKB2 S…	8.17848e-05	#aec7e8	0.5	0	12	2.54366		58	8.86654	-0.713709	Cluster 0	Regulation Of Extracellular Matrix Constituent Secretion (GO:0003330)	NOTCH1 RGCC RIC1 BMP2 IER3IP1 TNFRSF1A TNFRSF1B TNFRSF1B ARAP1 PIK3R5 TNFRSF1A MYO9B PLEKHO2 HCK VASP SPI1 MGAT1 SBNO2 GNAI2 FMNL1 ITGAX LILRB2 LILRB3 PILRA EFHD2 PPP1R18 TCIRG1 TLR2 C5AR1 SIGLEC9 MAN2B1 ARRB2 TGFB1 THEMIS2 AP5B1 LAPTM5 OSCAR FGR NCF2 ELF4 SLC15A3 BCL3 MYO1F ADAM8 GMIP TMEM127 GRN NOTCH1 CEBPB LITAF NFAM1 C10ORF54 RIN3 APOBR EHBP1L1 LRRC25 SIRPA FCGRT CCR1 TNIP1 STAT6 WAS CD4 HLA…	3.00964e-09	#440154	0.5	0	12	4.76074		58	8.86654	-0.713709	Cluster 0	Regulation Of Extracellular Matrix Constituent Secretion (GO:0003330)	NOTCH1 RGCC RIC1 BMP2 IER3IP1 TNFRSF1A TNFRSF1B TNFRSF1B ARAP1 PIK3R5 TNFRSF1A MYO9B PLEKHO2 HCK VASP SPI1 MGAT1 SBNO2 GNAI2 FMNL1 ITGAX LILRB2 LILRB3 PILRA EFHD2 PPP1R18 TCIRG1 TLR2 C5AR1 SIGLEC9 MAN2B1 ARRB2 TGFB1 THEMIS2 AP5B1 LAPTM5 OSCAR FGR NCF2 ELF4 SLC15A3 BCL3 MYO1F ADAM8 GMIP TMEM127 GRN NOTCH1 CEBPB LITAF NFAM1 C10ORF54 RIN3 APOBR EHBP1L1 LRRC25 SIRPA FCGRT CCR1 TNIP1 STAT6 WAS CD4 HLA…	0.279944	#440154	0.5	0	5	0.776464
4218	10.8657	-1.0732	Cluster 10	Positive Regulation Of Vascular Endothelial Growth Factor Production (GO:0010575)	TGFB1 CCBE1 FLT4 EIF2AK3 BRCA1 GATA4 SULF2 HIF1A ISL1 SULF1 RORA PTGS2 CXCL17 C3 IL1A IL1B C5 IL6 HPSE CYP1B1 IL6ST NOX1 NODAL ATF4 IL1B PTGS2 IL1A IL6 ZC3H12A IER3 CXCL8 IRAK2 CXCL3 ATP13A3 PFKFB3 NFKB1 TNIP1 FOSL2 ICAM1 PLAUR SRC RNF19B TNF SERPINB2 SOCS3 FNDC3B IL6ST GPR84 CEBPB NFKB2 DRAM1 BCL3 SPSB1 CYP1B1 MAPKAPK2 AC013444.1 LAMP1 HIF1A ARHGAP31 EHD1 SPHK1 OLR1 SNX9 AMPD3 SOD2 TRAF1 ADORA2A…	3.26185e-05	#aec7e8	0.5	0	12	2.74327		59	8.2511	0.533766	Cluster 0	Establishment Of Epithelial Cell Apical/Basal Polarity (GO:0045198)	RHOA SH3BP1 MSN OPHN1 MYO9A RAP2A EZR SYNE4 SLC9A3R1 CDC42 MSN SH3BP1 RHOA CDC42 VASP GNAI2 EZR ARHGAP30 LCP1 TMEM127 SLC9A3R1 FMNL1 RPS6KA1 ELF4 STAT6 CSK ARAP1 ACTR2 CYTH1 WIPF1 GRK2 GPSM3 CORO1A COTL1 TGFB1 WAS NBEAL2 TCIRG1 PLCB2 ARHGAP45 STXBP2 NCKAP1L IL17RA EFHD2 AKNA C10ORF54 HLA.A PRKCD PTPN6 HLA.B ARHGEF1 SUN2 PPP1R9B ARHGAP27 ADGRE5 CAPZB LRRC25 HCLS1 MOB3A ANXA11 GRB2 LAPTM5 ARRB2 UNC…	0.0114508	#440154	0.5	0	12	1.47058		59	8.2511	0.533766	Cluster 0	Establishment Of Epithelial Cell Apical/Basal Polarity (GO:0045198)	RHOA SH3BP1 MSN OPHN1 MYO9A RAP2A EZR SYNE4 SLC9A3R1 CDC42 MSN SH3BP1 RHOA CDC42 VASP GNAI2 EZR ARHGAP30 LCP1 TMEM127 SLC9A3R1 FMNL1 RPS6KA1 ELF4 STAT6 CSK ARAP1 ACTR2 CYTH1 WIPF1 GRK2 GPSM3 CORO1A COTL1 TGFB1 WAS NBEAL2 TCIRG1 PLCB2 ARHGAP45 STXBP2 NCKAP1L IL17RA EFHD2 AKNA C10ORF54 HLA.A PRKCD PTPN6 HLA.B ARHGEF1 SUN2 PPP1R9B ARHGAP27 ADGRE5 CAPZB LRRC25 HCLS1 MOB3A ANXA11 GRB2 LAPTM5 ARRB2 UNC…	0.095765	#440154	0.5	0	5	1.0094
4219	10.707	-1.27227	Cluster 10	Regulation Of Lipid Storage (GO:0010883)	CRP FTO PTPN2 FBXW7 HILPDA ITGB3 TNF SIRT1 NFKB1 C3 NFKBIA IL6 ZC3H12A LCP1 PLA2G10 PLIN5 PPARG ITGAV VSTM2A IKBKE APOB ZC3H12A NFKB1 TNF TRAF1 SOD2 ICAM1 RNF19B IRAK2 IL1B TNIP1 PFKFB3 SLAMF7 NFKB2 NINJ1 GPR84 IL6 PLAUR AMPD3 ADORA2A TNFAIP2 IL10 GPR132 TNFAIP8 IL1RN PTGS2 SOCS3 NFKBIA EHD1 CXCL3 CD274 CCR5 MMP19 IL27 SQRDL IER3 CCRL2 OASL ACOD1 MSC CXCL8 CD40 LILRB2 TNFRSF1B BCL3 LILRB4 SERPINB…	2.08155e-09	#aec7e8	0.5	0	12	4.84081		60	8.3601	-1.18563	Cluster 0	Regulation Of Establishment Of T Cell Polarity (GO:1903903)	GSN RIPOR2 DOCK8 ABL2 FLOT2 ARAP1 DOCK8 FLOT2 TLN1 IL17RA NCF2 ITGAX GSN PLCB2 HCK GNAI2 MYO1F FMNL1 SUN2 THEMIS2 NADK ADGRE5 STAT6 ARRB2 CSF2RB VASP C10ORF54 ARHGAP30 ITGAM GMIP SPI1 CYTH4 SMAP2 HCLS1 EHBP1L1 MAP3K3 ALOX5 WIPF1 MYO9B WAS TCIRG1 HLA.E TLR8 LILRB3 IGF2R ARHGAP45 NFAM1 APOBR ADCY7 NBEAL2 DYSF PLEKHO2 DOCK2 ADAM8 HK3 NCKAP1L SSH2 FGR TLR2 LYN MGAT1 CTSS APBB1IP RPS6KA1 CYTH1 TNFRSF1…	0.000152945	#440154	0.5	0	12	2.40773		60	8.3601	-1.18563	Cluster 0	Regulation Of Establishment Of T Cell Polarity (GO:1903903)	GSN RIPOR2 DOCK8 ABL2 FLOT2 ARAP1 DOCK8 FLOT2 TLN1 IL17RA NCF2 ITGAX GSN PLCB2 HCK GNAI2 MYO1F FMNL1 SUN2 THEMIS2 NADK ADGRE5 STAT6 ARRB2 CSF2RB VASP C10ORF54 ARHGAP30 ITGAM GMIP SPI1 CYTH4 SMAP2 HCLS1 EHBP1L1 MAP3K3 ALOX5 WIPF1 MYO9B WAS TCIRG1 HLA.E TLR8 LILRB3 IGF2R ARHGAP45 NFAM1 APOBR ADCY7 NBEAL2 DYSF PLEKHO2 DOCK2 ADAM8 HK3 NCKAP1L SSH2 FGR TLR2 LYN MGAT1 CTSS APBB1IP RPS6KA1 CYTH1 TNFRSF1…	0.0651359	#440154	0.5	0	5	1.09309
4220	10.2723	-1.0124	Cluster 10	Positive Regulation Of Lipid Storage (GO:0010884)	MSR1 SREBF2 HILPDA FITM1 FITM2 APOC4 CIDEA NFKB1 EHD1 OSBPL11 C3 ZC3H12A LCP1 PLA2G10 PLIN5 PLIN3 PLIN2 VSTM2A IKBKE SCARB1 TNIP1 ZC3H12A EHD1 ACSL1 NFKB2 NFKB1 SLC15A3 NINJ1 ICAM1 PFKFB3 MGAT1 TRAF1 BCL3 CEBPB PLAUR TICAM1 TNFRSF1B MAN2B1 TOM1 CTSZ SQRDL CD68 AMPD3 RNF19B RELB PSAP PIM3 LILRB4 EMILIN2 GPR84 MAPKAPK2 CCR5 GRN TNFAIP2 RAB20 RAPGEF1 PIK3R5 IRAK2 SRC LILRB2 SBNO2 MYO9B NFKBIE MSC CC…	1.6503e-11	#aec7e8	0.5	0	12	5.89122		61	9.37518	-1.16122	Cluster 0	Negative Regulation Of Interleukin-2 Production (GO:0032703)	CR1 HOMER2 HOMER3 XCL1 PRNP SFTPD TNFAIP3 LAPTM5 NAV3 LILRB4 HDAC9 FOXP3 PTPRC ZFP36 KAT5 TBX21 GBP1 VSIG4 TRIM27 HAVCR2 EZR LAPTM5 PIK3R5 IL10RA PILRA TNFRSF1B SLC15A3 LILRB2 HCK CCR1 LILRB4 HCLS1 CD4 SIGLEC9 TLR2 EMILIN2 CD68 OSCAR NCF2 GBP2 CTSS NINJ1 PLEKHO2 THEMIS2 C3AR1 IFI30 ITGAX AOAH MAN2B1 CCR5 C5AR1 CYTH4 CD53 LCP2 LCP1 SPI1 RASSF5 HLA.E TLR8 CTSZ ADGRE2 SQRDL CYTH1 NPL MGAT1 NCKAP1L M…	6.5147e-12	#440154	0.5	0	12	6.09305		61	9.37518	-1.16122	Cluster 0	Negative Regulation Of Interleukin-2 Production (GO:0032703)	CR1 HOMER2 HOMER3 XCL1 PRNP SFTPD TNFAIP3 LAPTM5 NAV3 LILRB4 HDAC9 FOXP3 PTPRC ZFP36 KAT5 TBX21 GBP1 VSIG4 TRIM27 HAVCR2 EZR LAPTM5 PIK3R5 IL10RA PILRA TNFRSF1B SLC15A3 LILRB2 HCK CCR1 LILRB4 HCLS1 CD4 SIGLEC9 TLR2 EMILIN2 CD68 OSCAR NCF2 GBP2 CTSS NINJ1 PLEKHO2 THEMIS2 C3AR1 IFI30 ITGAX AOAH MAN2B1 CCR5 C5AR1 CYTH4 CD53 LCP2 LCP1 SPI1 RASSF5 HLA.E TLR8 CTSZ ADGRE2 SQRDL CYTH1 NPL MGAT1 NCKAP1L M…	0.115168	#440154	0.5	0	5	0.969334
4221	10.5067	-1.60124	Cluster 10	Negative Regulation Of T Cell Differentiation (GO:0045581)	LAG3 IFNA2 IHH ZC3H8 FOXJ1 LILRB4 GLI3 IFNL1 IRF1 MDK TNFSF4 CTLA4 IFNB1 GBP4 IFNB1 LAG3 LILRB4 IRF1 OASL CCR5 DHX58 CTLA4 GBP2 OAS2 CCL3 SLAMF7 TRAF1 SOCS1 IFIT3 CCL5 IFNL1 TNIP3 RSAD2 IFI35 ISG20 CD274 CCL3L3 RNF19B IL10 NINJ1 IL27 TNF IFIT2 EPSTI1 CXCL11 TNFAIP8 NEURL3 MX1 LILRB2 HELZ2 MX2 IL1RN CMPK2 SLAMF1 LILRB1 TAP1 ADORA2A IGFLR1 IL10RA IRF7 APOBEC3G IL2RA MMP19 GBP1 CCL4 ACOD1 IFIH1 SLC1…	3.60019e-08	#aec7e8	0.5	0	12	4.22184		62	8.08939	-2.17042	Cluster 0	Regulation Of Cell-Cell Adhesion Mediated By Integrin (GO:0033632)	CXCL13 WNK1 PODXL PIEZO1 CCL5 CD3E SKAP1 FERMT3 DPP4 CD3E SKAP1 WIPF1 TRBC2 CCL5 CD8A TRAC SUN2 TMC6 IL32 CORO1A ARPC1B ARHGEF1 RASSF5 HCLS1 DEF6 NLRC5 ARHGAP45 HLA.A IKZF1 TRAF3IP3 SELPLG RASAL3 TRBC1 IL2RG CSK GRK2 FERMT3 HLA.E AKNA DENND1C CYTH1 TLN1 RAC2 SEPT1 TGFB1 PPP6R1 GPSM3 SEPT9 KLF13 SH3BP1 ETS1 ARHGAP30 CST7 CARD11 PCED1B STAT6 CD247 ZAP70 DNM2 ARHGAP4 ANXA11 NKG7 LAPTM5 GNAI2 DENND2D…	0.173754	#440154	0.5	0	5	0.880033		62	8.08939	-2.17042	Cluster 0	Regulation Of Cell-Cell Adhesion Mediated By Integrin (GO:0033632)	CXCL13 WNK1 PODXL PIEZO1 CCL5 CD3E SKAP1 FERMT3 DPP4 CD3E SKAP1 WIPF1 TRBC2 CCL5 CD8A TRAC SUN2 TMC6 IL32 CORO1A ARPC1B ARHGEF1 RASSF5 HCLS1 DEF6 NLRC5 ARHGAP45 HLA.A IKZF1 TRAF3IP3 SELPLG RASAL3 TRBC1 IL2RG CSK GRK2 FERMT3 HLA.E AKNA DENND1C CYTH1 TLN1 RAC2 SEPT1 TGFB1 PPP6R1 GPSM3 SEPT9 KLF13 SH3BP1 ETS1 ARHGAP30 CST7 CARD11 PCED1B STAT6 CD247 ZAP70 DNM2 ARHGAP4 ANXA11 NKG7 LAPTM5 GNAI2 DENND2D…	4.74678e-05	#440154	0.5	0	12	2.6618
4222	10.1946	-1.27579	Cluster 10	Negative Regulation Of CD8-positive, Alpha-Beta T Cell Activation (GO:2001186)	SOCS1 HFE LILRB1 DAPL1 SLC4A2 ZBTB7B VSIR SOCS1 LILRB1 GPR132 ZBTB7B TNIP1 NFKB2 LILRB2 BCL3 TRAF1 EHD1 SBNO2 SLAMF7 DAPL1 OGFR HELZ2 NINJ1 TNFRSF1B LILRB4 TYMP ICAM1 MSC FBXW5 SIGLEC1 DHX58 RELB TNFAIP2 RNF19B ZC3H12A CD274 SRC OR7E33P GRAMD1A SLC2A6 CTSZ CD40 HLX SLC15A3 SPHK1 ATP10A MAN2B1 COX17P1 IL27 GRN PFKFB3 TICAM1 IL1RN CCR5 MPHOSPH8 DNASE2 UNC93B1 ADORA2A MGAT1 ARHGEF28 MMP19 RPS27P29 L…	2.00103e-08	#aec7e8	0.5	0	12	4.34937		63	8.7212	-1.55554	Cluster 0	Negative Regulation Of Interleukin-17 Production (GO:0032700)	NCKAP1L PRNP TNFSF4 IFNG IL36RN IL12B IL12A VSIR TLR4 FOXP3 NCKAP1L TLR4 TLR8 DOCK2 LCP1 CTSS WIPF1 IL10RA NCF2 PIK3R5 LYN RASSF5 PIK3AP1 CYBB HCLS1 NOD2 HCK SIRPA DOCK8 LAPTM5 CCR1 AOAH CD274 TLR2 STX11 CD53 MPEG1 ARHGAP30 CYTH1 CHST11 GBP2 FMNL1 TNFRSF1B OGFRL1 MYO9B THEMIS2 ADCY7 TBXAS1 TAP1 IL17RA PTPRC EMILIN2 LCP2 ELF4 PTAFR MYO1G ARAP1 PLCB2 PTPRE LILRB2 ARRB2 APBB1IP ITGAX CD4 HLA.E PLEKH…	1.40977e-09	#440154	0.5	0	12	4.92543		63	8.7212	-1.55554	Cluster 0	Negative Regulation Of Interleukin-17 Production (GO:0032700)	NCKAP1L PRNP TNFSF4 IFNG IL36RN IL12B IL12A VSIR TLR4 FOXP3 NCKAP1L TLR4 TLR8 DOCK2 LCP1 CTSS WIPF1 IL10RA NCF2 PIK3R5 LYN RASSF5 PIK3AP1 CYBB HCLS1 NOD2 HCK SIRPA DOCK8 LAPTM5 CCR1 AOAH CD274 TLR2 STX11 CD53 MPEG1 ARHGAP30 CYTH1 CHST11 GBP2 FMNL1 TNFRSF1B OGFRL1 MYO9B THEMIS2 ADCY7 TBXAS1 TAP1 IL17RA PTPRC EMILIN2 LCP2 ELF4 PTAFR MYO1G ARAP1 PLCB2 PTPRE LILRB2 ARRB2 APBB1IP ITGAX CD4 HLA.E PLEKH…	0.0026962	#440154	0.5	0	12	1.78462
4223	10.5407	-1.25809	Cluster 10	Positive Regulation Of Isotype Switching (GO:0045830)	TGFB1 PAXIP1 TFRC TNFSF13 SHLD1 IL4 HMCES CLCF1 SHLD2 TRAPPC13 TP53BP1 KMT5C KMT5B INSL6 MAD2L2 PAXIP1 KMT5C IL4 TNFSF13 CLCF1 TFRC OSCAR HMCES PILRA TGFB1 MTF1 MAD2L2 TRAPPC13 LILRB4 GRAMD1A INSL6 RHOG NINJ1 SLC15A3 RNF19B LILRB2 STAT5A PLAUR EHD1 AP5B1 SPI1 STXBP2 MAN2B1 UNC93B1 CD68 GPR132 TNFRSF1B CYBA FTL NFKB2 PTPN1 GRN EMILIN2 ICAM1 TRAF1 RPS6KA1 PIM3 PIK3R5 HCK SHKBP1 TNFSF12.TNFSF13 BCL2…	7.223e-05	#aec7e8	0.5	0	12	2.57064		64	9.28973	-1.31186	Cluster 0	Negative Regulation Of Interleukin-12 Production (GO:0032695)	SLAMF1 IL10 MEFV LILRB1 THBS1 IRAK3 TLR8 PIBF1 CCR7 CMKLR1 JAK3 LILRP2 TIGIT LILRB2 TNFRSF1B HCK TLR8 PILRA PIK3R5 LILRB1 LYN ADGRE2 LILRB3 NCF2 TLR2 IL10RA THEMIS2 MX2 GBP2 SIGLEC9 OSCAR CTSS AOAH NOD2 ITGAX CYTH4 NINJ1 HCLS1 LILRA6 LITAF RNF19B LAPTM5 TNFAIP2 STX11 MEFV TRAF1 TNIP1 C5AR1 LCP2 FMNL1 SLAMF7 CD53 LCP1 CCR5 TAP1 SLC15A3 HLA.E ARRB2 SPI1 SLC43A2 FGR PTAFR CD4 DHX58 LILRB4 IRF1 MPEG1…	3.46827e-14	#440154	0.5	0	12	7.22994		64	9.28973	-1.31186	Cluster 0	Negative Regulation Of Interleukin-12 Production (GO:0032695)	SLAMF1 IL10 MEFV LILRB1 THBS1 IRAK3 TLR8 PIBF1 CCR7 CMKLR1 JAK3 LILRP2 TIGIT LILRB2 TNFRSF1B HCK TLR8 PILRA PIK3R5 LILRB1 LYN ADGRE2 LILRB3 NCF2 TLR2 IL10RA THEMIS2 MX2 GBP2 SIGLEC9 OSCAR CTSS AOAH NOD2 ITGAX CYTH4 NINJ1 HCLS1 LILRA6 LITAF RNF19B LAPTM5 TNFAIP2 STX11 MEFV TRAF1 TNIP1 C5AR1 LCP2 FMNL1 SLAMF7 CD53 LCP1 CCR5 TAP1 SLC15A3 HLA.E ARRB2 SPI1 SLC43A2 FGR PTAFR CD4 DHX58 LILRB4 IRF1 MPEG1…	0.101995	#440154	0.5	0	5	0.995711
4224	10.8358	-1.1163	Cluster 10	Positive Regulation Of Nuclear Division (GO:0051785)	INSR EDN1 PDGFRB EGF NPM2 EDN3 DMRT1 IGF1 IGF2 SIRT2 EREG OOEP IL1A BTC IL1B EPGN RGCC CD28 PHIP PDGFB LRP5 TGFA INS NUP62 NUSAP1 DRD3 IL1B IL1A PDGFB IRAK2 IER3 CXCL3 SERPINB2 PLAUR TNF EREG ZC3H12A SRC PFKFB3 ICAM1 PTGS2 CXCL2 SPHK1 NFKB1 AMPD3 CXCL8 OLR1 MMP19 SPSB1 CCRL2 AC013444.1 GPR84 IL6 TNIP1 PIM3 TRIP10 TICAM1 USP12 ADORA2A TMBIM1 SOCS3 EHD1 TRAF1 SNX9 BMP6 MSC NFKB2 RGCC NINJ1 RNF19B F…	0.000842846	#aec7e8	0.5	0	12	2.03713		65	9.91426	-1.1778	Cluster 0	Negative Regulation Of Interleukin-10 Production (GO:0032693)	CD274 MMP8 IL23R LILRB1 PDCD1LG2 TYROBP LILRB4 DLL1 VSIR FOXP3 TNFRSF21 FCGR2B IL23A IL12B JAK3 TRIB2 LILRB4 LILRB2 CD274 PILRA TNFRSF1B NINJ1 SLC15A3 TNIP1 CCR5 LILRB1 TRAF1 PIK3R5 OSCAR HCK SLAMF7 AMPD3 IL10RA CD68 RNF19B CTSZ GPR84 EHD1 SIGLEC1 CD40 TNFAIP2 SIGLEC9 SQRDL TYMP ICAM1 ADORA2A PLAUR TYROBP BCL3 MAN2B1 IL1RN EMILIN2 NFKB2 SLC43A2 MSC IFI30 DHX58 CD4 FCER1G NFKB1 LILRA3 GRN SLC2A6 R…	1.41178e-16	#440154	0.5	0	12	8.42512		65	9.91426	-1.1778	Cluster 0	Negative Regulation Of Interleukin-10 Production (GO:0032693)	CD274 MMP8 IL23R LILRB1 PDCD1LG2 TYROBP LILRB4 DLL1 VSIR FOXP3 TNFRSF21 FCGR2B IL23A IL12B JAK3 TRIB2 LILRB4 LILRB2 CD274 PILRA TNFRSF1B NINJ1 SLC15A3 TNIP1 CCR5 LILRB1 TRAF1 PIK3R5 OSCAR HCK SLAMF7 AMPD3 IL10RA CD68 RNF19B CTSZ GPR84 EHD1 SIGLEC1 CD40 TNFAIP2 SIGLEC9 SQRDL TYMP ICAM1 ADORA2A PLAUR TYROBP BCL3 MAN2B1 IL1RN EMILIN2 NFKB2 SLC43A2 MSC IFI30 DHX58 CD4 FCER1G NFKB1 LILRA3 GRN SLC2A6 R…	0.101995	#440154	0.5	0	5	0.995711
4225	10.5221	-0.621663	Cluster 10	Regulation Of Hyaluronan Biosynthetic Process (GO:1900125)	TGFB1 EGF CLTC PDGFB NFKB1 PDGFB NFKB1 TGFB1 MAPKAPK2 TNIP1 NFKB2 EHD1 RAB35 SBNO2 WDR1 MYO9B TRIM25 TLN1 OGFR ELF4 LAMP1 RAPGEF1 BCL3 PFKFB3 GRN GRINA PTPN1 RELB ZC3H12A TICAM1 TRAF1 NINJ1 CHMP4B SRC VASP PIM3 GNAI2 MGAT1 ZDHHC5 CLTC MYH9 MAN2B1 PLEKHM2 ISY1.RAB43 ICAM1 PIK3R5 STK40 TNFRSF1B IER3 PLXND1 RNF19B PPP1R18 FLII CTSZ FURIN SPHK1 AMPD3 UPF1 TMEM127 CEBPB USP12 METRNL ADORA2A SZRD1 ARHG…	1.01471e-06	#aec7e8	0.5	0	12	3.49683		66	9.18049	-1.23812	Cluster 0	Negative Regulation Of Interleukin-1 Production (GO:0032692)	IL10 FFAR1 NLRP2B SERPINB1 CARD8 IGF1 LILRB4 NLRP12 CEACAM1 ELF4 CPTP PYDC1 CARD18 PYDC2 CARD16 GHRL GAS6 MEFV CX3CR1 GSTP1 TNFAIP3 CX3CL1 NLRP7 ZC3H12A CARD17P NLRP3 FFAR4 GHSR CD33 GIT1 LILRB2 HCK TNFRSF1B PILRA ADGRE2 STX11 RNF19B LILRB3 OSCAR BCL3 THEMIS2 PIK3R5 TLR2 ITGAX NCF2 C5AR1 SIGLEC9 AOAH NINJ1 LYN TNFAIP2 SPI1 LILRA6 APOBR IL10RA NOD2 ARRB2 ZC3H12A CTSS FGR LITAF CYTH4 SLC43A2 FMNL1 …	3.51903e-08	#440154	0.5	0	12	4.22679		66	9.18049	-1.23812	Cluster 0	Negative Regulation Of Interleukin-1 Production (GO:0032692)	IL10 FFAR1 NLRP2B SERPINB1 CARD8 IGF1 LILRB4 NLRP12 CEACAM1 ELF4 CPTP PYDC1 CARD18 PYDC2 CARD16 GHRL GAS6 MEFV CX3CR1 GSTP1 TNFAIP3 CX3CL1 NLRP7 ZC3H12A CARD17P NLRP3 FFAR4 GHSR CD33 GIT1 LILRB2 HCK TNFRSF1B PILRA ADGRE2 STX11 RNF19B LILRB3 OSCAR BCL3 THEMIS2 PIK3R5 TLR2 ITGAX NCF2 C5AR1 SIGLEC9 AOAH NINJ1 LYN TNFAIP2 SPI1 LILRA6 APOBR IL10RA NOD2 ARRB2 ZC3H12A CTSS FGR LITAF CYTH4 SLC43A2 FMNL1 …	0.0317009	#440154	0.5	0	12	1.24946
4226	10.7794	-1.27042	Cluster 10	Regulation Of Hydrogen Peroxide-Induced Cell Death (GO:1903205)	LRRK2 GPR37L1 PYCR1 TXN PARK7 RIPK1 NFE2L2 TXN NFE2L2 RIPK1 PARK7 ICAM1 LRRK2 CD274 NAMPT RNF19B PLAUR PYCR1 SLAMF7 NINJ1 S100A11 LITAF TNIP1 GBP2 TICAM1 TRIM25 SPHK1 TLR8 IL1RN CASP5 TNFAIP2 IL27 SQRDL DHX58 MMP19 CCR5 EHD1 PTPN1 OGFRL1 IER3 LAP3 TRAF1 CCRL2 CD40 ACOD1 ACSL1 DDX60L NEURL3 MSC C17ORF96 SOD2 NIPAL4 TRIP10 TLR4 FTL LILRB2 OASL PARP14 GPR84 TNF SOCS3 NFKB2 RNF149 GBP1 LYN FTH1 IL15R…	2.1742e-14	#aec7e8	0.5	0	12	7.33135		67	9.22153	-1.17644	Cluster 0	Negative Regulation Of Interleukin-1 Beta Production (GO:0032691)	FFAR1 NLRP2B SERPINB1 CARD8 IGF1 LILRB4 ELF4 CPTP PYDC1 CARD18 PYDC2 CARD16 GHRL MEFV CX3CR1 GSTP1 TNFAIP3 CX3CL1 NLRP7 ZC3H12A CARD17P NLRP3 FFAR4 GHSR CD33 GIT1 LILRB2 HCK TNFRSF1B PILRA STX11 ADGRE2 PIK3R5 THEMIS2 OSCAR TLR2 LILRB3 AOAH ITGAX LYN IL10RA RNF19B BCL3 LAPTM5 SPI1 NCF2 C5AR1 SIGLEC9 ARRB2 FMNL1 NOD2 FGR CTSS NINJ1 ZC3H12A LCP2 LGALS9 TNFAIP2 APOBR FCER1G CYTH4 PLCB2 LILRA6 HCLS1 S…	6.81201e-08	#440154	0.5	0	12	4.08336		67	9.22153	-1.17644	Cluster 0	Negative Regulation Of Interleukin-1 Beta Production (GO:0032691)	FFAR1 NLRP2B SERPINB1 CARD8 IGF1 LILRB4 ELF4 CPTP PYDC1 CARD18 PYDC2 CARD16 GHRL MEFV CX3CR1 GSTP1 TNFAIP3 CX3CL1 NLRP7 ZC3H12A CARD17P NLRP3 FFAR4 GHSR CD33 GIT1 LILRB2 HCK TNFRSF1B PILRA STX11 ADGRE2 PIK3R5 THEMIS2 OSCAR TLR2 LILRB3 AOAH ITGAX LYN IL10RA RNF19B BCL3 LAPTM5 SPI1 NCF2 C5AR1 SIGLEC9 ARRB2 FMNL1 NOD2 FGR CTSS NINJ1 ZC3H12A LCP2 LGALS9 TNFAIP2 APOBR FCER1G CYTH4 PLCB2 LILRA6 HCLS1 S…	0.115168	#440154	0.5	0	5	0.969334
4227	10.8117	-1.1765	Cluster 10	Regulation Of Immature T Cell Proliferation In Thymus (GO:0033084)	IL1A IL1B SHH TMEM131L IHH IL1A IL1B CXCL3 AC013444.1 SERPINB2 OLR1 IRAK2 PTGS2 CXCL8 TNF IHH SHH GPR84 NFKB1 NLRP3 PLAUR IER3 IL6 ZC3H12A INHBB CCRL2 SRC ADORA2A PFKFB3 RP11.12A2.1 CXCL2 TRAF1 LIPN SLC2A6 TNIP1 EHD1 RNF19B ICAM1 CLEC5A AMPD3 SOD2 ACOD1 SOCS3 MSC SLC43A2 NINJ1 MAP3K8 NFKB2 KMO CD300E MMP19 TNIP3 IL1RN ATP13A3 IL10 CCL3L3 CCR5 GRAMD1A CXCL1 TNFAIP8 SPHK1 CSF3 TICAM1 GPR132 C15ORF4…	1.009e-13	#aec7e8	0.5	0	12	6.99805		68	9.15547	-1.47364	Cluster 0	Negative Regulation Of Interferon-Beta Production (GO:0032688)	PYCARD YY1 PPM1B PTPRS SIRPA LILRB1 REL MORC3 NLRC3 RELB PIK3R5 TNFRSF1B LILRB2 HCK LILRB1 RELB LYN MYO9B LAPTM5 PILRA FMNL1 CYTH1 IL10RA THEMIS2 ITGAX ARAP1 TLR2 SIGLEC9 ARHGAP30 DOCK2 ADGRE2 NCF2 NCKAP1L CYTH4 SPI1 HCLS1 MYO1G SLC15A3 SLC43A2 RAPGEF1 AOAH RASSF5 OSCAR SIRPA GMIP ARHGAP45 NLRC5 WIPF1 ARRB2 CTSS PIK3AP1 NFKB2 LGALS9 PLCB2 MAN2B1 TYMP TNIP1 LILRB3 PLEKHO2 LCP2 TLR8 LCP1 NOD2 AKNA …	1.75881e-09	#440154	0.5	0	12	4.87739		68	9.15547	-1.47364	Cluster 0	Negative Regulation Of Interferon-Beta Production (GO:0032688)	PYCARD YY1 PPM1B PTPRS SIRPA LILRB1 REL MORC3 NLRC3 RELB PIK3R5 TNFRSF1B LILRB2 HCK LILRB1 RELB LYN MYO9B LAPTM5 PILRA FMNL1 CYTH1 IL10RA THEMIS2 ITGAX ARAP1 TLR2 SIGLEC9 ARHGAP30 DOCK2 ADGRE2 NCF2 NCKAP1L CYTH4 SPI1 HCLS1 MYO1G SLC15A3 SLC43A2 RAPGEF1 AOAH RASSF5 OSCAR SIRPA GMIP ARHGAP45 NLRC5 WIPF1 ARRB2 CTSS PIK3AP1 NFKB2 LGALS9 PLCB2 MAN2B1 TYMP TNIP1 LILRB3 PLEKHO2 LCP2 TLR8 LCP1 NOD2 AKNA …	0.691855	#440154	0.5	0	5	0.579992
4228	10.7768	-1.12846	Cluster 10	Regulation Of Immunoglobulin Mediated Immune Response (GO:0002889)	IL4 SUPT6H IL10 TNFSF4 NECTIN2 NECTIN2 IL10 IL27 ICAM1 IL1RN EHD1 SLAMF7 TNIP1 SUPT6H SPHK1 GRAMD1A TRAF1 TRIP10 MMP19 NIPAL4 ZC3H12A ACOD1 SRC PFKFB3 RNF19B NFKB2 ABTB2 DHX58 BCL3 SOCS3 MAPKAPK2 FFAR3 SPSB1 MSC PTPN1 TNF CD274 IER3 CD40 TICAM1 HELZ2 PLAUR C17ORF96 PIM3 OGFR NINJ1 SOCS1 AMPD3 IL4 SIGLEC1 OASL SBNO2 ABCD1 CLCF1 SLAMF1 CHMP4B GPR84 TNFSF9 LILRB4 GRINA ADORA2A SLC2A6 GRN NFKB1 TMEM6…	8.90947e-06	#aec7e8	0.5	0	12	3.02507		69	9.32181	-0.941396	Cluster 0	Regulation Of Cell Activation (GO:0050865)	TEC IL6 SYK FUNDC2 TXK GNAQ NRG1 LILRA2 FCER1G LILRP2 TREM2 FCER1G PILRA HCK SIGLEC9 OSCAR NCF2 TBXAS1 SYK ITGAX LILRB2 SLC15A3 NPL SPI1 LAPTM5 IGSF6 CTSS EMILIN2 TYROBP TLR2 AIF1 PIK3R5 AOAH CYTH4 C5AR1 CD68 IFI30 LRRC25 LILRA2 THEMIS2 LYN TNFRSF1B LILRB3 CCR1 PLEKHO2 PTAFR LGALS9 LILRA6 ADGRE2 APOBR STX11 NCKAP1L ARRB2 HK3 ITGAM PLCB2 IL17RA LILRB4 NCF4 MAN2B1 TLR8 CYBB FGR HCLS1 CD86 CECR1 C3A…	4.88531e-16	#440154	0.5	0	12	8.15555		69	9.32181	-0.941396	Cluster 0	Regulation Of Cell Activation (GO:0050865)	TEC IL6 SYK FUNDC2 TXK GNAQ NRG1 LILRA2 FCER1G LILRP2 TREM2 FCER1G PILRA HCK SIGLEC9 OSCAR NCF2 TBXAS1 SYK ITGAX LILRB2 SLC15A3 NPL SPI1 LAPTM5 IGSF6 CTSS EMILIN2 TYROBP TLR2 AIF1 PIK3R5 AOAH CYTH4 C5AR1 CD68 IFI30 LRRC25 LILRA2 THEMIS2 LYN TNFRSF1B LILRB3 CCR1 PLEKHO2 PTAFR LGALS9 LILRA6 ADGRE2 APOBR STX11 NCKAP1L ARRB2 HK3 ITGAM PLCB2 IL17RA LILRB4 NCF4 MAN2B1 TLR8 CYBB FGR HCLS1 CD86 CECR1 C3A…	0.00303592	#440154	0.5	0	12	1.75885
4229	10.6353	-0.704907	Cluster 10	Positive Regulation Of Response To Cytokine Stimulus (GO:0060760)	CD74 DHX9 TSLP WNT5A AGPAT2 IFIH1 IL7 MAVS AXL LRRC70 TAF9 TRIM44 GAS6 RIGI TSLP GAS6 IFIH1 WNT5A PDCD1LG2 TNIP1 MYO1C AKAP2 LGALS1 TRIM25 EHD2 MAPKAPK2 TRIP10 IL7 DRAM1 DHX58 SLAMF7 MYOF ICAM1 PML AXL EHD1 MXRA8 CHPF2 SEC61A1 IL27 MGAT1 CD40 DDR2 ABCC1 TRIM44 UBE2Z HELZ2 TPM4 TSPAN4 CYBRD1 TRAF1 AGPAT2 ZDHHC5 SDF4 CLMP ANXA5 FRMD6 LAP3 PTX3 TICAM1 TRAM2 CRIM1 RRAS FAM129B SZRD1 EFEMP2 LAMP1 IL1R…	0.00121712	#aec7e8	0.5	0	12	1.95733		70	9.62877	-1.95681	Cluster 0	Negative Regulation Of Innate Immune Response (GO:0045824)	PTPN2 FAM3A MUL1 ACOD1 OAS1 ATG12 CNOT7 OAS3 TRAFD1 TNFAIP3 CGAS NLRC5 DTX4 NLRC3 AURKB PPP6C IRAK3 IFI16 AKT1 SUSD4 SLAMF8 BANF1 LYAR CR1 YTHDF2 YTHDF3 STAT2 METTL3 PARP1 ISG15 YWHAZ ZDHHC18 MYO1C SERPING1 TYRO3 CEP63 TTLL12 CACTIN USP15 GRN PRKDC USP18 INS DCST1 SAMHD1 RPS19 DHX58 PCBP2 TREX1 VSIG4 TRIM21 ATG5 OAS2 MX2 OAS1 DHX58 TAP1 HELZ2 LILRB2 HCK MX1 TRIM25 IFIT3 NCF2 LGALS9 TNFRSF1B LYN P…	1.05519e-08	#440154	0.5	0	12	4.48833		70	9.62877	-1.95681	Cluster 0	Negative Regulation Of Innate Immune Response (GO:0045824)	PTPN2 FAM3A MUL1 ACOD1 OAS1 ATG12 CNOT7 OAS3 TRAFD1 TNFAIP3 CGAS NLRC5 DTX4 NLRC3 AURKB PPP6C IRAK3 IFI16 AKT1 SUSD4 SLAMF8 BANF1 LYAR CR1 YTHDF2 YTHDF3 STAT2 METTL3 PARP1 ISG15 YWHAZ ZDHHC18 MYO1C SERPING1 TYRO3 CEP63 TTLL12 CACTIN USP15 GRN PRKDC USP18 INS DCST1 SAMHD1 RPS19 DHX58 PCBP2 TREX1 VSIG4 TRIM21 ATG5 OAS2 MX2 OAS1 DHX58 TAP1 HELZ2 LILRB2 HCK MX1 TRIM25 IFIT3 NCF2 LGALS9 TNFRSF1B LYN P…	0.0317009	#440154	0.5	0	12	1.24946
4230	10.4537	-1.35441	Cluster 10	Positive Regulation Of Immunoglobulin Production (GO:0002639)	IL10 XBP1 XCL1 HLA-E IL2 SHLD1 PTPRC IL6 TNFSF4 CLCF1 SHLD2 TLR9 VAMP3 GPI MAD2L2 MZB1 CD86 PAXIP1 PHB2 IL21 PHB1 TFRC HMCES POLR2D TRAPPC13 DNAJB9 TP53BP1 KMT5C STX4 KMT5B TNFRSF4 EPHB2 INSL6 SASH3 TRAF1 NINJ1 NFKB2 EHD1 ICAM1 TNIP1 RNF19B IL10 ZC3H12A RELB CD40 TNF SLAMF7 TNFRSF1B ADORA2A BCL2A1 LILRB4 GPR132 NFKB1 LILRB2 TNFAIP8 PIM3 PILRA DHX58 BCL3 MSC SLAMF1 AMPD3 IL1RN PLAUR NFKBIE SOCS1 C…	7.75864e-07	#aec7e8	0.5	0	12	3.55511		71	8.52324	-0.249459	Cluster 0	Negative Regulation Of Inflammatory Response To Wounding (GO:0106015)	IL33 MDK REG3A STAT3 SIGLEC10 PTPN6 GIT1 STAT3 PTPN6 STAT6 ARAP1 GRK2 SECTM1 HLA.A SIGLEC10 CSK SH3BP1 EFHD2 GNAI2 HLA.B SIPA1 ALOX5 TAP1 ARHGAP27 GMIP TNFRSF14 TCIRG1 WAS NADK HLA.E VASP FMNL1 TYK2 RPS6KA1 REG3A CTDSP1 NBEAL2 CORO1A C10ORF54 ARRB2 LRP10 PRKCD ARHGAP45 ZDHHC18 SMAP2 ARHGAP30 GPSM3 ANXA11 FAM53B GIT1 HLA.C ATP2A3 SUN2 GAK PLCB2 HCLS1 PBX2 CSF2RB ARHGEF1 MYO9B ABTB1 NFAM1 MYO1F DNM…	0.231716	#440154	0.5	0	5	0.817522		71	8.52324	-0.249459	Cluster 0	Negative Regulation Of Inflammatory Response To Wounding (GO:0106015)	IL33 MDK REG3A STAT3 SIGLEC10 PTPN6 GIT1 STAT3 PTPN6 STAT6 ARAP1 GRK2 SECTM1 HLA.A SIGLEC10 CSK SH3BP1 EFHD2 GNAI2 HLA.B SIPA1 ALOX5 TAP1 ARHGAP27 GMIP TNFRSF14 TCIRG1 WAS NADK HLA.E VASP FMNL1 TYK2 RPS6KA1 REG3A CTDSP1 NBEAL2 CORO1A C10ORF54 ARRB2 LRP10 PRKCD ARHGAP45 ZDHHC18 SMAP2 ARHGAP30 GPSM3 ANXA11 FAM53B GIT1 HLA.C ATP2A3 SUN2 GAK PLCB2 HCLS1 PBX2 CSF2RB ARHGEF1 MYO9B ABTB1 NFAM1 MYO1F DNM…	0.101995	#440154	0.5	0	5	0.995711
4231	10.3088	-0.430976	Cluster 10	Regulation Of Macrophage Differentiation (GO:0045649)	C1QC IL34 PTPN2 CSF1 INHBA LIF PRKCA CASP8 HSF1 ID2 FADD RIPK1 PF4 INHA MGAT1 RIPK1 SBNO2 CD68 CTSA CSF1 EHD1 GRN MAN2B1 CTSZ TNIP1 NINJ1 CEBPB IER3 BCL3 RELB C1QC SPHK1 SLC15A3 OGFR TMBIM1 ICAM1 SQRDL PLAUR NFKB2 WDR1 ZC3H12A MYO9B ARPC1B TICAM1 AMPD3 FCGRT LIF MVP MOB3C NUCB1 MAPKAPK2 CD4 CCR5 TGFB1 TLN1 TMEM127 PIM3 MMP19 LAMP1 PPP1R18 TCIRG1 TNFRSF1B RNH1 ABCD1 SPSB1 CTSD MAP2K3 PLEKHM2 EMP3 …	1.51276e-05	#aec7e8	0.5	0	12	2.91012		72	9.33448	-0.952749	Cluster 0	Regulation Of Calcium-Mediated Signaling (GO:0050848)	LACRT RIT2 GPR143 P2RX5 P2RX4 MAPT TMBIM4 P2RX3 P2RX2 CDH13 RGN CALM2 CD22 JPT2 SLC24A4 PLEK HTT LRRK2 TREM2 SLC8A2 SLA2 ITPR1 NEUROD2 CLEC7A CCL4 CCL3 GBP1 TRAT1 PLCG2 CMKLR1 LAPTM5 NCF2 CTSS PILRA CLEC7A AOAH SLC15A3 PIK3R5 HCK TLR2 LILRB2 IGSF6 SIGLEC9 PLEK TLR8 CCR1 NPL CD53 TNFRSF1B C3AR1 SIRPA GBP2 ADGRE2 LYN HCLS1 PTPRC ITGAX PIK3AP1 CD84 DOCK8 CYBB CYTH4 LCP1 CCR5 SLC43A2 CD86 LILRB4 FCER…	2.83047e-13	#440154	0.5	0	12	6.77407		72	9.33448	-0.952749	Cluster 0	Regulation Of Calcium-Mediated Signaling (GO:0050848)	LACRT RIT2 GPR143 P2RX5 P2RX4 MAPT TMBIM4 P2RX3 P2RX2 CDH13 RGN CALM2 CD22 JPT2 SLC24A4 PLEK HTT LRRK2 TREM2 SLC8A2 SLA2 ITPR1 NEUROD2 CLEC7A CCL4 CCL3 GBP1 TRAT1 PLCG2 CMKLR1 LAPTM5 NCF2 CTSS PILRA CLEC7A AOAH SLC15A3 PIK3R5 HCK TLR2 LILRB2 IGSF6 SIGLEC9 PLEK TLR8 CCR1 NPL CD53 TNFRSF1B C3AR1 SIRPA GBP2 ADGRE2 LYN HCLS1 PTPRC ITGAX PIK3AP1 CD84 DOCK8 CYBB CYTH4 LCP1 CCR5 SLC43A2 CD86 LILRB4 FCER…	0.0343933	#440154	0.5	0	12	1.23176
4232	10.6674	-1.21709	Cluster 10	Negative Regulation Of Bone Resorption (GO:0045779)	P2RX7 INPP5D IL6 TMEM119 TNFAIP3 UBASH3B CARTPT GPR137B GPR137 P2RX7 ZC3H12A TRAF1 CCR5 GPR137B CD274 EHD1 ICAM1 IL6 AMPD3 TNIP1 TNFAIP3 LILRB4 NFKB2 RNF19B IL10RA NINJ1 SLAMF7 TNF BCL3 PFKFB3 SLC15A3 MSC PLAUR ADORA2A PIK3R5 DRAM1 GPR84 MAN2B1 LILRB2 RELB CD68 NFKB1 GPR132 TNFRSF1B SOCS3 DHX58 EMILIN2 MMP19 TNFAIP2 GRAMD1A IL10 PILRA CCRL2 TICAM1 IL1RN CTSZ IL27 MYO9B SQRDL LILRB1 SIRPA SLC2A6 A…	3.9298e-08	#aec7e8	0.5	0	12	4.20282		73	8.0818	-2.25574	Cluster 0	Gamma-Delta T Cell Activation (GO:0046629)	CXADR TRGC1 TRGC2 JAML TCF7 SOX13 CD3G TRDC CD3E MICA ITK MICB CD3E TRGC2 ITK TCF7 TRGC1 IL2RG CD3G TRAC PTPRC ZAP70 CD247 TRBC2 PRKCH SELPLG TRDC TRAF3IP3 JAK3 PCED1B IL16 RASSF5 IKZF1 TRBC1 JAML AKNA SEPT1 HLA.E CDC42SE1 IL7R CD3D THEMIS GIMAP5 HCLS1 CORO1A LCK WIPF1 CD6 DENND2D CD2 CD28 RASAL3 FYB GIMAP4 B2M NLRC5 ARHGAP45 GIMAP6 FGD3 TBC1D10C STK17B PRF1 IL32 CD53 ETS1 CD96 FAM65B CLEC2D ARHG…	0.0018718	#440154	0.5	0	12	1.86387		73	8.0818	-2.25574	Cluster 0	Gamma-Delta T Cell Activation (GO:0046629)	CXADR TRGC1 TRGC2 JAML TCF7 SOX13 CD3G TRDC CD3E MICA ITK MICB CD3E TRGC2 ITK TCF7 TRGC1 IL2RG CD3G TRAC PTPRC ZAP70 CD247 TRBC2 PRKCH SELPLG TRDC TRAF3IP3 JAK3 PCED1B IL16 RASSF5 IKZF1 TRBC1 JAML AKNA SEPT1 HLA.E CDC42SE1 IL7R CD3D THEMIS GIMAP5 HCLS1 CORO1A LCK WIPF1 CD6 DENND2D CD2 CD28 RASAL3 FYB GIMAP4 B2M NLRC5 ARHGAP45 GIMAP6 FGD3 TBC1D10C STK17B PRF1 IL32 CD53 ETS1 CD96 FAM65B CLEC2D ARHG…	0.352396	#440154	0.5	0	5	0.726484
4233	10.6362	-1.25129	Cluster 10	Negative Regulation Of Bone Remodeling (GO:0046851)	P2RX7 INPP5D GREM1 IL6 TMEM119 TNFAIP3 UBASH3B CARTPT SFRP1 GPR137B GPR137 IL6 DRAM1 ZC3H12A EHD1 P2RX7 TRAF1 CD274 ICAM1 GPR137B CCR5 AMPD3 GREM1 TNIP1 PDCD1LG2 MSC SLAMF7 PFKFB3 PLAUR LILRB4 TNFAIP3 TNF NFKB2 TMEM119 RNF19B SPHK1 NINJ1 BCL3 MGAT1 SLC15A3 MMP19 MAN2B1 SOCS3 GPR84 IL10RA MYO9B ADORA2A RELB MMP14 GRAMD1A TICAM1 SIRPA CD68 METRNL DHX58 EMILIN2 IL27 NFKB1 IL1RN CTSZ LILRB2 IL10 LAMP…	1.72472e-07	#aec7e8	0.5	0	12	3.88164		74	8.68977	-1.06668	Cluster 0	Negative Regulation Of Inflammatory Response To Antigenic Stimulus (GO:0002862)	RHBDF2 YES1 LYN SRC SYK FURIN PLK2 TREM2 HCK MAPK14 FGR SELENOS MKRN2 PLCG1 FYN HLA-DRB1 HCK ARAP1 NCF2 ITGAX SPI1 VASP FGR TNFRSF1B LYN PIK3R5 SIGLEC9 ARRB2 LILRB3 MYO9B LILRB2 THEMIS2 FMNL1 PLEKHO2 PILRA OSCAR TLR2 GNAI2 EFHD2 TCIRG1 GMIP NADK TLR8 PLCB2 APOBR CTSS MYO1F LAPTM5 PPP1R18 PRKCD MAN2B1 IL17RA LRRC25 HK3 CYTH4 ITGAM ELF4 CSF2RB AP5B1 ARHGAP30 NFAM1 ADAM8 RPS6KA1 SBNO2 TGFB1 WAS CCR1…	2.09221e-07	#440154	0.5	0	12	3.8397		74	8.68977	-1.06668	Cluster 0	Negative Regulation Of Inflammatory Response To Antigenic Stimulus (GO:0002862)	RHBDF2 YES1 LYN SRC SYK FURIN PLK2 TREM2 HCK MAPK14 FGR SELENOS MKRN2 PLCG1 FYN HLA-DRB1 HCK ARAP1 NCF2 ITGAX SPI1 VASP FGR TNFRSF1B LYN PIK3R5 SIGLEC9 ARRB2 LILRB3 MYO9B LILRB2 THEMIS2 FMNL1 PLEKHO2 PILRA OSCAR TLR2 GNAI2 EFHD2 TCIRG1 GMIP NADK TLR8 PLCB2 APOBR CTSS MYO1F LAPTM5 PPP1R18 PRKCD MAN2B1 IL17RA LRRC25 HK3 CYTH4 ITGAM ELF4 CSF2RB AP5B1 ARHGAP30 NFAM1 ADAM8 RPS6KA1 SBNO2 TGFB1 WAS CCR1…	0.291469	#440154	0.5	0	5	0.767704
4234	10.7696	-1.00113	Cluster 10	Regulation Of Neuroinflammatory Response (GO:0150077)	IL33 DAGLA MMP8 MMP3 SPHK1 NR1D1 IGF1 TNF IL18 MMP9 CD200R1 TREM2 TNFRSF1B PTGS2 IL1B IL4 IL6 NUPR1 PLCG2 PLAUR ICAM1 GPR84 AMPD3 MMP19 SPHK1 TNF PFKFB3 IL1B IER3 SLC15A3 ZC3H12A NINJ1 CD68 LILRB4 CTSZ RAB7B TNIP1 EHD1 CXCL3 IL1RN MSC PTGS2 CCR5 RNF19B TRAF1 SOCS3 CCRL2 MMP9 SQRDL SIGLEC1 EMILIN2 SLC2A6 ADORA2A IRAK2 SRC SLAMF7 METRNL C1QA PILRA IL10 SOD2 C1QC BCL3 TNFRSF1B LILRB2 FCGRT IL27 SERP…	1.2757e-11	#aec7e8	0.5	0	12	5.94712		75	8.09918	-1.19371	Cluster 0	Positive Regulation Of Cellular Senescence (GO:2000774)	ARG2 CGAS B2M SIRT1 HLA-G EEF1E1 MORC3 KIR2DL4 TP53 YPEL3 B2M MORC3 SIRT1 KIR2DL4 EEF1E1 ARG2 TP53 YPEL3 JAML PTPRC FAM65B EVI2B R3HDM4 SELPLG SELL TNFRSF10C TMEM154 CD101 WIPF1 HCLS1 ARHGAP25 JAK3 CD53 FPR2 MYO1F P2RY13 CXCR2 HLA.E FPR1 CEACAM21 MNDA CEACAM3 CXCR1 NFAM1 CDC42SE1 ICAM3 GPSM3 TMEM71 ABTB1 DPEP2 SP140 CD3E CCR3 TAGAP FGD3 TREML2 DOCK8 CORO1A PSTPIP1 CSF2RB FYB PIK3CD NCF1B ARHGAP9 …	0.000207983	#440154	0.5	0	12	2.34099		75	8.09918	-1.19371	Cluster 0	Positive Regulation Of Cellular Senescence (GO:2000774)	ARG2 CGAS B2M SIRT1 HLA-G EEF1E1 MORC3 KIR2DL4 TP53 YPEL3 B2M MORC3 SIRT1 KIR2DL4 EEF1E1 ARG2 TP53 YPEL3 JAML PTPRC FAM65B EVI2B R3HDM4 SELPLG SELL TNFRSF10C TMEM154 CD101 WIPF1 HCLS1 ARHGAP25 JAK3 CD53 FPR2 MYO1F P2RY13 CXCR2 HLA.E FPR1 CEACAM21 MNDA CEACAM3 CXCR1 NFAM1 CDC42SE1 ICAM3 GPSM3 TMEM71 ABTB1 DPEP2 SP140 CD3E CCR3 TAGAP FGD3 TREML2 DOCK8 CORO1A PSTPIP1 CSF2RB FYB PIK3CD NCF1B ARHGAP9 …	0.000257306	#440154	0.5	0	12	2.29478
4235	10.7987	-1.10971	Cluster 10	Positive Regulation Of Tissue Remodeling (GO:0034105)	TMBIM1 IL21 ROCK1 IL15 IL23A ROCK2 NRG1 IL18 IL2 IL23A IL15 TMBIM1 ROCK1 IL18 ROCK2 IL2 IL21 NRG1 BCL2A1 NR4A3 IL3 SMG1P5 CD44 SQRDL LACTB TNIP1 CAST FNDC3B PLAUR LRCH1 PTGS2 ZC3H12A SPHK1 DRAM1 FOSL2 ANO6 CD274 SLK RNF19B AF196972.4 GK IER3 ICAM1 ITGA6 APOL6 SMG1P2 SOD2 CLCF1 RP11.608O8.2 AMPD3 IL13RA1 IL1RN ITGA2 TICAM1 SNX9 USP12 PDCD1LG2 ZDHHC20 LAMP1 TGFBR2 MYOF ACSL4 SAMD9L TRIP12 ATP13A3 N…	3.06505e-06	#aec7e8	0.5	0	12	3.25678		76	9.12325	-1.3982	Cluster 0	Negative Regulation Of Immune Response (GO:0050777)	CCR2 SPINK5 LYN CD300A AMBP RC3H1 MUL1 LILRB1 FOXP3 MAPK14 ATG12 COL3A1 FCGR2B FER TRAFD1 SMCR8 PDCD1 ALOX15 TNFAIP3 CGAS DTX4 NLRC3 TREM2 AURKB PPP6C IFNL1 IRAK3 IFI16 AKT1 BANF1 HAVCR2 LYAR RHBDF2 YES1 CR1 SYK PARP1 PLK2 YWHAZ HLA-G ZDHHC18 HCK FGR MYO1C MKRN2 TYRO3 CEP63 CACTIN HLA-DRB1 SRC SPI1 FURIN PRKDC WDR41 SAMSN1 FCRLB LGALS3 DHX58 PCBP2 ENPP3 TREX1 PLCG1 TRIM27 FYN TRIM21 ATG5 HCK ARAP…	1.05519e-08	#440154	0.5	0	12	4.48833		76	9.12325	-1.3982	Cluster 0	Negative Regulation Of Immune Response (GO:0050777)	CCR2 SPINK5 LYN CD300A AMBP RC3H1 MUL1 LILRB1 FOXP3 MAPK14 ATG12 COL3A1 FCGR2B FER TRAFD1 SMCR8 PDCD1 ALOX15 TNFAIP3 CGAS DTX4 NLRC3 TREM2 AURKB PPP6C IFNL1 IRAK3 IFI16 AKT1 BANF1 HAVCR2 LYAR RHBDF2 YES1 CR1 SYK PARP1 PLK2 YWHAZ HLA-G ZDHHC18 HCK FGR MYO1C MKRN2 TYRO3 CEP63 CACTIN HLA-DRB1 SRC SPI1 FURIN PRKDC WDR41 SAMSN1 FCRLB LGALS3 DHX58 PCBP2 ENPP3 TREX1 PLCG1 TRIM27 FYN TRIM21 ATG5 HCK ARAP…	0.0606988	#440154	0.5	0	5	1.10841
4236	10.6295	-0.931463	Cluster 10	Regulation Of Hormone Secretion (GO:0046883)	IL11 EDN1 EDN3 NMB LIF OSM SOX11 CCKAR VAMP2 FFAR3 SCG5 FFAR2 VAMP3 FGF23 SNX6 OSM LIF VAMP3 IL11 FFAR3 HCAR2 PTGS2 SCG5 RNF19B FFAR2 EDN3 HCAR3 PLAUR CPE IER3 BCL3 SOCS3 LILRB3 PILRA SNX6 IL1RN EDN1 C5AR1 LILRA6 TREM1 PFKFB3 GCH1 AQP9 LILRB2 ZC3H12A GPR84 ICAM1 QPCT ITM2B NINJ1 NMB CXCL8 OSCAR CLEC4E HCK SIRPA FPR2 FGF23 NAMPT PROK2 NAMPTP1 ADGRG3 ELL2 CASP5 TREML4 EHD1 SUSD6 GPR42 TLR2 ITGAX IL…	3.5654e-10	#aec7e8	0.5	0	12	5.22395		77	8.6228	-0.813308	Cluster 0	Positive Regulation Of Chemokine (C-X-C Motif) Ligand 2 Production (GO:2000343)	LCP1 TIRAP HMGB1 TNF TLR4 MBL2 LCP1 TLR4 NCF2 TLR8 LYN CTSS AQP9 TLR2 HCK STX11 ACSL1 PIK3R5 PIK3AP1 LILRB2 PILRA TNFRSF1B ADGRE2 C5AR1 LILRB3 TLR1 HCLS1 ITGAX AOAH LITAF TNF THEMIS2 IL6R CSF2RB NOD2 DOCK2 CYBB LCP2 LAPTM5 CCR1 SIGLEC9 MPEG1 FGR NAMPT CD53 EVI2B PTAFR VNN2 FPR2 WIPF1 PTPRC CLEC4E IL17RA IL10RA RNF19B CLEC7A LILRA6 DOCK8 PLXNC1 RASSF2 RNF149 RASSF5 GBP2 CYTH4 NCKAP1L TBXAS1 TLR6 M…	1.60775e-15	#440154	0.5	0	12	7.89689		77	8.6228	-0.813308	Cluster 0	Positive Regulation Of Chemokine (C-X-C Motif) Ligand 2 Production (GO:2000343)	LCP1 TIRAP HMGB1 TNF TLR4 MBL2 LCP1 TLR4 NCF2 TLR8 LYN CTSS AQP9 TLR2 HCK STX11 ACSL1 PIK3R5 PIK3AP1 LILRB2 PILRA TNFRSF1B ADGRE2 C5AR1 LILRB3 TLR1 HCLS1 ITGAX AOAH LITAF TNF THEMIS2 IL6R CSF2RB NOD2 DOCK2 CYBB LCP2 LAPTM5 CCR1 SIGLEC9 MPEG1 FGR NAMPT CD53 EVI2B PTAFR VNN2 FPR2 WIPF1 PTPRC CLEC4E IL17RA IL10RA RNF19B CLEC7A LILRA6 DOCK8 PLXNC1 RASSF2 RNF149 RASSF5 GBP2 CYTH4 NCKAP1L TBXAS1 TLR6 M…	0.0343933	#440154	0.5	0	12	1.23176
4237	10.8713	-1.24142	Cluster 10	Regulation Of Interleukin-1-Mediated Signaling Pathway (GO:2000659)	IL1RN IL6 VRK2 ZNF675 OTUD4 IL6 IL1RN SLAMF7 IL27 ACOD1 IL10 ICAM1 VRK2 CD274 TRAF1 TNF RNF19B ZC3H12A OTUD4 SOD2 MMP19 NIPAL4 SOCS3 CD40 PLAUR OASL DHX58 TNIP3 FFAR3 AMPD3 GPR84 PTGS2 IL1B MSC CCRL2 LILRB4 SLAMF1 NEURL3 PFKFB3 NFKB1 IRAK2 IL15RA SOCS1 ADORA2A TNIP1 SERPINB2 IER3 GPR132 CCL3L3 SIGLEC1 KMO TNFAIP2 ZNF675 TNFAIP8 CCR5 CXCL3 IFIH1 CMPK2 DUSP5 DRAM1 EHD1 LACTB CSF3 SLC2A6 ABTB2 SPHK1…	9.70561e-08	#aec7e8	0.5	0	12	4.00649		78	8.36497	-0.0044763	Cluster 0	Regulation Of Autophagosome Maturation (GO:1901096)	UVRAG CALCOCO2 RUBCN PHF23 CLEC16A IRGM ATG12 CLN3 FYCO1 TBC1D25 TOM1 TMEM39A SMCR8 UBQLN4 ATG5 TECPR1 TOM1 SMCR8 EHBP1L1 FMNL1 FBRS TECPR1 RUBCN MYO9B CYTH1 ARAP1 LRCH4 SBNO2 TMEM127 ELL AP5B1 MAPKAPK2 WDTC1 TFEB ARHGAP45 RAPGEF1 CRTC2 STAT6 TYK2 KDM2A TNFRSF1B GAK PIK3R5 TCIRG1 ARHGEF1 ARHGAP4 AKNA GRK2 MGAT1 ARRB2 MEF2D NLRC5 CORO7 CCDC69 KLF13 IL17RA ATG2A RARA WDR81 DNM2 SUN2 IL10RA UVRAG TB…	0.0196235	#440154	0.5	0	12	1.35361		78	8.36497	-0.0044763	Cluster 0	Regulation Of Autophagosome Maturation (GO:1901096)	UVRAG CALCOCO2 RUBCN PHF23 CLEC16A IRGM ATG12 CLN3 FYCO1 TBC1D25 TOM1 TMEM39A SMCR8 UBQLN4 ATG5 TECPR1 TOM1 SMCR8 EHBP1L1 FMNL1 FBRS TECPR1 RUBCN MYO9B CYTH1 ARAP1 LRCH4 SBNO2 TMEM127 ELL AP5B1 MAPKAPK2 WDTC1 TFEB ARHGAP45 RAPGEF1 CRTC2 STAT6 TYK2 KDM2A TNFRSF1B GAK PIK3R5 TCIRG1 ARHGEF1 ARHGAP4 AKNA GRK2 MGAT1 ARRB2 MEF2D NLRC5 CORO7 CCDC69 KLF13 IL17RA ATG2A RARA WDR81 DNM2 SUN2 IL10RA UVRAG TB…	0.938035	#440154	0.5	0	5	0.51389
4238	10.7586	-1.21985	Cluster 10	Negative Regulation By Host Of Viral Genome Replication (GO:0044828)	PRKN CCNK VAPA ZC3H12A EIF2AK4 SMC6 ZBED1 SMC5 SMC5 SMC6 CCNK EIF2AK4 ZBED1 ZC3H12A VAPA NFKB1 NFKB2 TRAF1 PTPN1 TNIP1 TNF ICAM1 IER3 SOCS3 DUSP5 TRIP10 NR4A3 ETF1 PTGS2 NFKBIE IRAK2 ATP13A3 RNF19B USP12 SLAMF7 PI4K2B TICAM1 IL1RN PFKFB3 NUP153 DDX21 B4GALT5 AMPD3 EHD1 SLAMF1 TNFSF9 IL1B CD274 WAPL PIM3 SYNCRIP PLAUR MSC MAPKAPK2 SAMSN1 EIF3A IL27 ACOD1 DRAM1 BCL3 JARID2 BCL2A1 RELB MMP19 MYO1E S…	5.28652e-06	#aec7e8	0.5	0	12	3.13842		79	7.97437	-0.382245	Cluster 0	Regulation Of Aspartic-Type Endopeptidase Activity Involved In Amyloid Precursor Protein Catabolic Process (GO:1902959)	PICALM EFNA1 LYN EFNA3 ROCK2 BIN1 SORL1 EPHA4 SORL1 PICALM SSH2 IGF2R LYN LRRK2 TLR8 SMCHD1 TLR1 RASSF2 CHST15 OGFRL1 NCF2 RNF149 MXD1 ARAP1 VNN2 FAM129A TNFRSF10C GLT1D1 TLR4 FGL2 MNDA CSF2RB CR1 DYSF FAM65B PLXNC1 TLR6 CTSS P2RY13 NAMPT KDM7A PTPRC PTPRJ FPR2 PREX1 DOCK8 EHBP1L1 IL17RA ARHGAP26 PPP3R1 ADGRE3 DENND3 XPO6 TRANK1 TLR2 SMAP2 TMEM154 IQSEC1 ITGAX AQP9 MCL1 CPPED1 HCK NADK ACSL1 BCL6…	8.15529e-10	#440154	0.5	0	12	5.04428		79	7.97437	-0.382245	Cluster 0	Regulation Of Aspartic-Type Endopeptidase Activity Involved In Amyloid Precursor Protein Catabolic Process (GO:1902959)	PICALM EFNA1 LYN EFNA3 ROCK2 BIN1 SORL1 EPHA4 SORL1 PICALM SSH2 IGF2R LYN LRRK2 TLR8 SMCHD1 TLR1 RASSF2 CHST15 OGFRL1 NCF2 RNF149 MXD1 ARAP1 VNN2 FAM129A TNFRSF10C GLT1D1 TLR4 FGL2 MNDA CSF2RB CR1 DYSF FAM65B PLXNC1 TLR6 CTSS P2RY13 NAMPT KDM7A PTPRC PTPRJ FPR2 PREX1 DOCK8 EHBP1L1 IL17RA ARHGAP26 PPP3R1 ADGRE3 DENND3 XPO6 TRANK1 TLR2 SMAP2 TMEM154 IQSEC1 ITGAX AQP9 MCL1 CPPED1 HCK NADK ACSL1 BCL6…	0.0606988	#440154	0.5	0	5	1.10841
4239	10.9483	-0.869675	Cluster 10	Negative Regulation Of Biosynthetic Process (GO:0009890)	PAGE4 PPARA GSTP1 PARK7 INS IL6 CEACAM1 HSP90B2P ASXL3 GPER1 EMILIN1 ABCD1 ABCD2 CIITA SLC18A2 COA8 ABCD1 SLC18A2 IL6 GPER1 HSP90B2P CEACAM1 INS EMILIN1 PAGE4 CIITA PPARA GSTP1 MVP ABCD2 ASXL3 CTSA MSC CD63 APOL2 PARK7 ICAM1 SGPP2 SUSD6 SLC45A2 NAGLU EXOC3 PFKFB2 TRAF1 SSR4 BCL3 SQRDL RNF19B DRAM1 HNF4A GRN TOM1 CD40 FABP1 TNFRSF14 ANXA5 TMEM54 ERO1B GBA TMEM37 MLXIPL C1QC P2RX4 SCGN SPSB1 TICAM1…	0.000120507	#aec7e8	0.5	0	12	2.45949		80	8.1312	-1.30541	Cluster 0	Regulation Of Antigen Receptor-Mediated Signaling Pathway (GO:0050854)	LYN PTPRC CD300A RC3H1 PTPN22 GCSAM PTPRC LCP1 LYN DOCK8 HCLS1 WIPF1 DOCK2 EVI2B FAM65B CD53 ARHGAP30 RASSF5 HLA.E THEMIS2 NCF2 STK4 SSH2 TLR8 PIK3CD JAML PTPN6 LAPTM5 CTSS TLR6 ARHGAP25 CDC42SE1 MYO1F TLR1 WAS PTPN22 CYTH1 AOAH CORO1A FYB APBB1IP CSF2RB FMNL1 FGR IKZF1 RNF149 NCKAP1L AKNA SORL1 SMAP2 TMEM154 VNN2 HCK LSP1 GPSM3 MNDA CD300A NCF1B ADGRE5 TMEM71 SLC12A6 P2RY13 RASSF2 FPR2 MXD1 IL16…	3.51903e-08	#440154	0.5	0	12	4.22679		80	8.1312	-1.30541	Cluster 0	Regulation Of Antigen Receptor-Mediated Signaling Pathway (GO:0050854)	LYN PTPRC CD300A RC3H1 PTPN22 GCSAM PTPRC LCP1 LYN DOCK8 HCLS1 WIPF1 DOCK2 EVI2B FAM65B CD53 ARHGAP30 RASSF5 HLA.E THEMIS2 NCF2 STK4 SSH2 TLR8 PIK3CD JAML PTPN6 LAPTM5 CTSS TLR6 ARHGAP25 CDC42SE1 MYO1F TLR1 WAS PTPN22 CYTH1 AOAH CORO1A FYB APBB1IP CSF2RB FMNL1 FGR IKZF1 RNF149 NCKAP1L AKNA SORL1 SMAP2 TMEM154 VNN2 HCK LSP1 GPSM3 MNDA CD300A NCF1B ADGRE5 TMEM71 SLC12A6 P2RY13 RASSF2 FPR2 MXD1 IL16…	0.0070769	#440154	0.5	0	12	1.57508
4240	10.8151	-1.27198	Cluster 10	Negative Regulation By Host Of Viral Process (GO:0044793)	PRKN CCNK VAPA ZC3H12A CCL8 PSMC3 EIF2AK4 SMC6 ZBED1 LTF PITX3 SMC5 CCNK CCL8 SMC6 ZC3H12A SMC5 ZBED1 EIF2AK4 LTF PITX3 PSMC3 VAPA TRIP10 B4GALT5 ICAM1 CD274 DRAM1 SLC43A3 LAP3 GPR84 PTPN1 TNIP1 IER3 NFKB2 NFKB1 TNF PLAUR CD40 SLAMF7 TRAF1 AMPD3 ETF1 LILRB4 MSC MAPKAPK2 NFKBIE IL1RN TICAM1 RNF19B SOCS3 CCL7 CAMP IRAK2 EHD1 CCL13 ACOD1 PIM3 LMNB1 MAFG DUSP5 PI4K2B PFKFB3 CXCL10 PPIF TNFSF9 ANKRD22…	1.7341e-06	#aec7e8	0.5	0	12	3.38046		81	9.14402	-1.20357	Cluster 0	Positive Regulation Of Chemokine Production (GO:0032722)	CD74 WNT5A EIF2AK2 AZU1 IL18 OAS1 TLR2 IL1B IL7 IL6 LCP1 OAS3 TNFSF4 IFNG TLR9 TLR7 TLR4 TLR3 APP DDX3X CD84 HMGB1 TNF PYCARD CLEC7A IL17RA ADIPOQ EGR1 IL33 CHIA SYK TSLP TIRAP ALOX15B IL17A ADCYAP1 MAVS F2RL1 IL17F CSF1R AIRE TWIST1 DEFB124 HIF1A AGER AIF1 C5 HMOX1 FFAR3 FFAR2 LGALS9 IL6R MBL2 HCK TLR2 LILRB2 NCF2 PILRA TNFRSF1B LYN ITGAX PIK3R5 CTSS THEMIS2 SIGLEC9 TLR8 LILRB3 LAPTM5 OSCAR LGAL…	8.72985e-07	#440154	0.5	0	12	3.5295		81	9.14402	-1.20357	Cluster 0	Positive Regulation Of Chemokine Production (GO:0032722)	CD74 WNT5A EIF2AK2 AZU1 IL18 OAS1 TLR2 IL1B IL7 IL6 LCP1 OAS3 TNFSF4 IFNG TLR9 TLR7 TLR4 TLR3 APP DDX3X CD84 HMGB1 TNF PYCARD CLEC7A IL17RA ADIPOQ EGR1 IL33 CHIA SYK TSLP TIRAP ALOX15B IL17A ADCYAP1 MAVS F2RL1 IL17F CSF1R AIRE TWIST1 DEFB124 HIF1A AGER AIF1 C5 HMOX1 FFAR3 FFAR2 LGALS9 IL6R MBL2 HCK TLR2 LILRB2 NCF2 PILRA TNFRSF1B LYN ITGAX PIK3R5 CTSS THEMIS2 SIGLEC9 TLR8 LILRB3 LAPTM5 OSCAR LGAL…	0.257333	#440154	0.5	0	5	0.794752
4241	7.25651	2.451	Cluster 10	Negative Regulation Of Apoptotic Signaling Pathway (GO:2001234)	GPX1 ACVR1 PRELID1 BDNF PIH1D1 CFLAR QARS1 MMP9 TGFBR1 MAPK8IP2 TMBIM1 IL4 BMP4 PINK1 SLC25A31 HSPA1A BCL2 NDUFS3 PPIF ITGA6 PHIP ZMYND11 TMBIM6 GRINA PSMD10 RB1 RELA PRKN SLC25A4 DDX3X ASAH2 NOL3 URI1 SLC35F6 PARK7 GHITM CLU TNF CX3CL1 CAAP1 AKT1 RIPK1 TCF7L2 CSNK2A2 CSNK2A1 SIAH2 HGF FZD9 IGF1 PLAUR NR4A2 BCL2L1 PSME3 BIRC6 AVP FXN SLC25A6 SLC25A5 BCL2L2 SRC MAZ NDUFA13 HTT RTKN2 MPV17L AKR1B1 …	4.95872e-05	#aec7e8	0.5	0	12	2.65232		82	7.96677	-0.382108	Cluster 0	Negative Regulation Of Humoral Immune Response Mediated By Circulating Immunoglobulin (GO:0002924)	CR1 CR2 FCGR2B CR1L SUSD4 FOXJ1 C4BPB SVEP1 CD46 CR1 CD46 FCGR2B STEAP4 LRRK2 SORL1 TLR8 CFLAR SSH2 VNN2 SMCHD1 RNF149 DDX60L TMEM154 TLR6 DOCK8 TLR1 LYN TRANK1 PTPRC APOL6 CTSS MXD1 FAM65B FAM129A CR2 MNDA FPR2 NCF2 ALOX5 FCGR2C PLXNC1 FGL2 GCA NAMPT CSF2RB ARAP1 IGF2R USP15 C4BPB ALPK1 CR1L KCNE3 TLR4 GLT1D1 BCL6 SMAP2 SLC22A4 PARP14 KDM7A PTPRJ WIPF1 P2RY13 LCP1 LYST NLRC4 FOXJ1 STAT6 ACSL1 SV…	4.21452e-07	#440154	0.5	0	12	3.68763		82	7.96677	-0.382108	Cluster 0	Negative Regulation Of Humoral Immune Response Mediated By Circulating Immunoglobulin (GO:0002924)	CR1 CR2 FCGR2B CR1L SUSD4 FOXJ1 C4BPB SVEP1 CD46 CR1 CD46 FCGR2B STEAP4 LRRK2 SORL1 TLR8 CFLAR SSH2 VNN2 SMCHD1 RNF149 DDX60L TMEM154 TLR6 DOCK8 TLR1 LYN TRANK1 PTPRC APOL6 CTSS MXD1 FAM65B FAM129A CR2 MNDA FPR2 NCF2 ALOX5 FCGR2C PLXNC1 FGL2 GCA NAMPT CSF2RB ARAP1 IGF2R USP15 C4BPB ALPK1 CR1L KCNE3 TLR4 GLT1D1 BCL6 SMAP2 SLC22A4 PARP14 KDM7A PTPRJ WIPF1 P2RY13 LCP1 LYST NLRC4 FOXJ1 STAT6 ACSL1 SV…	0.137848	#440154	0.5	0	5	0.930301
4242	10.8493	-1.19394	Cluster 10	Positive Regulation Of Mast Cell Activation (GO:0033005)	NR4A3 TSLP SPHK2 HAVCR1 CRLF2 NECTIN2 TSLP NECTIN2 IL27 CRLF2 SLAMF7 IL1RN ICAM1 IL10 NR4A3 ACOD1 MMP19 NIPAL4 TRAF1 RNF19B SOCS3 FFAR3 TNF ZC3H12A TRIP10 PFKFB3 EHD1 NEURL3 DHX58 OASL SOCS1 CD274 PLAUR SPHK1 SPSB1 SLAMF1 TNIP1 ABTB2 CCL3L3 BCL3 CD40 IER3 SOD2 GRAMD1A CLCF1 LILRB4 MSC SPHK2 IL6 TNFSF9 GPR84 CCRL2 SLC2A6 IL15RA PIM3 PTGS2 FCAMR NINJ1 TNIP3 IL1B ISG15 SIGLEC1 ADORA2A SRC HAVCR1 AMP…	2.35942e-07	#aec7e8	0.5	0	12	3.8136		83	8.6918	-1.85583	Cluster 0	Regulation Of Alpha-Beta T Cell Proliferation (GO:0046640)	IRF1 SYK EBI3 TNFSF4 TNFRSF14 MAPK8IP1 SH3RF1 TNFRSF14 IRF1 PTK2B HLA.A SYK LAPTM5 TFEB PTPN6 CYTH1 MYO1G PRKCD TAP1 LGALS9 HLA.B HLA.E NCF1 LYN IRF5 THEMIS2 HCK GPSM3 LSP1 STAT6 WAS HCLS1 ARHGAP30 CSK MYO9B ARAP1 TCIRG1 FMNL1 TNFRSF1B WIPF1 CCDC88B LCP1 GRK2 HLA.DRB1 EFHD2 CORO1A CD53 GMIP PIK3CD ARHGAP45 DOK3 PIK3R5 NCF1C EBI3 PLEKHO1 ARHGAP4 SMAP2 LILRB1 SIPA1 MOB3A NOD2 PARP10 LILRB2 NLRC5 AR…	4.33526e-05	#440154	0.5	0	12	2.68149		83	8.6918	-1.85583	Cluster 0	Regulation Of Alpha-Beta T Cell Proliferation (GO:0046640)	IRF1 SYK EBI3 TNFSF4 TNFRSF14 MAPK8IP1 SH3RF1 TNFRSF14 IRF1 PTK2B HLA.A SYK LAPTM5 TFEB PTPN6 CYTH1 MYO1G PRKCD TAP1 LGALS9 HLA.B HLA.E NCF1 LYN IRF5 THEMIS2 HCK GPSM3 LSP1 STAT6 WAS HCLS1 ARHGAP30 CSK MYO9B ARAP1 TCIRG1 FMNL1 TNFRSF1B WIPF1 CCDC88B LCP1 GRK2 HLA.DRB1 EFHD2 CORO1A CD53 GMIP PIK3CD ARHGAP45 DOK3 PIK3R5 NCF1C EBI3 PLEKHO1 ARHGAP4 SMAP2 LILRB1 SIPA1 MOB3A NOD2 PARP10 LILRB2 NLRC5 AR…	0.180605	#440154	0.5	0	5	0.871635
4243	10.6227	-1.29728	Cluster 10	Positive Regulation Of Podosome Assembly (GO:0071803)	IL5 CSF2 LCP1 FSCN1 TNF TNF TRAF1 CD274 NFKB2 TNIP1 CSF2 LCP1 EHD1 NFKB1 IL5 BCL2A1 ZC3H12A GRAMD1A ADORA2A MYO9B TNFSF9 RNF19B ICAM1 DUSP2 MSC PIM3 TNFRSF1B GPR132 IFNG CD40 FSCN1 NFKBIE TAP1 SLAMF7 IL31 IRF5 AMPD3 MYO1G DUSP5 PIK3R5 NINJ1 SOCS1 PPP1R18 TICAM1 RELB RUNX3 STAT5A SLAMF1 PFKFB3 CCR5 LILRB2 CCL3L3 MTF1 RAB35 STX11 PTPN1 IL1B PILRA SLC15A3 SRC TNFAIP2 VASP DHX58 SLC2A6 TRIM25 PLAUR M…	2.08155e-09	#aec7e8	0.5	0	12	4.84081		84	9.82178	-2.19394	Cluster 0	Positive Regulation Of Chromatin Binding (GO:0035563)	KDM4D HMBOX1 GMNN DTX3L ZNF618 MED9 DDX11 PARP9 KDM4D PARP9 DDX11 MED9 HMBOX1 DTX3L GMNN ZNF618 PARP14 OAS2 MX2 XAF1 MX1 GBP4 OAS3 RNF213 APOL6 TRIM22 DDX60L IFI44L IFIT3 POLE RP11.10O17.1 ZBP1 OAS1 CMPK2 EIF2AK2 IFIT2 SAMD9 XRCC2 IFIT1 CFLAR TICRR SZT2 HELZ2 DDX58 RSAD2 IFIH1 HELB STAT1 IFI44 EPSTI1 ESCO2 DNMT1 SP110 RFWD3 CLSPN SLFN12L RBM15 FANCI MCM3 TTF2 ESPL1 LAP3 FBXO5 SMG1 MCM10 C12ORF65 …	6.01204e-06	#440154	0.5	0	12	3.11049		84	9.82178	-2.19394	Cluster 0	Positive Regulation Of Chromatin Binding (GO:0035563)	KDM4D HMBOX1 GMNN DTX3L ZNF618 MED9 DDX11 PARP9 KDM4D PARP9 DDX11 MED9 HMBOX1 DTX3L GMNN ZNF618 PARP14 OAS2 MX2 XAF1 MX1 GBP4 OAS3 RNF213 APOL6 TRIM22 DDX60L IFI44L IFIT3 POLE RP11.10O17.1 ZBP1 OAS1 CMPK2 EIF2AK2 IFIT2 SAMD9 XRCC2 IFIT1 CFLAR TICRR SZT2 HELZ2 DDX58 RSAD2 IFIH1 HELB STAT1 IFI44 EPSTI1 ESCO2 DNMT1 SP110 RFWD3 CLSPN SLFN12L RBM15 FANCI MCM3 TTF2 ESPL1 LAP3 FBXO5 SMG1 MCM10 C12ORF65 …	1.69846e-07	#440154	0.5	0	12	3.88497
4244	10.7312	-1.13219	Cluster 10	Negative Regulation Of Amyloid-Beta Clearance (GO:1900222)	IFNGR1 MYOCD IFNG SRF HMGCR TNF LRPAP1 TNF SRF CD274 LRPAP1 IFNGR1 IFNG MYOCD ICAM1 CSF2 ZC3H12A TNIP1 PLAUR TRAF1 GRN EMILIN2 NINJ1 MAPKAPK2 ARHGAP31 SLC15A3 IER3 NFKB2 RNF19B MSC GPR84 EHD1 CTSZ MAN2B1 SRC PFKFB3 MGAT1 CD68 PIM3 LAMP1 MMP19 CCR5 PSAP SQRDL BCL3 DUSP5 IL1B NFKB1 SOCS3 CXCL3 AMPD3 TRIP10 CCRL2 TICAM1 SPHK1 RAB7B NFKBIE PILRA MYO9B LILRB4 TOM1 ADORA2A FCGRT GM2A TNFRSF1B CH507.9B2…	5.64628e-11	#aec7e8	0.5	0	12	5.62412		85	8.09072	-0.722231	Cluster 0	Regulation Of Adipose Tissue Development (GO:1904177)	NCOA2 SPI1 NCOA1 LCP1 PARP1 PPARG PLAAT3 SORL1 SIRT1 PRKAA1 TRPM4 LCP1 SORL1 SSH2 DOCK8 NCF2 TLR8 PTPRC LYN MYO1F ARAP1 IL17RA CSF2RB WIPF1 DOCK2 FAM65B TNFRSF10C NADK FMNL1 VNN2 CTSS ARHGAP30 P2RY13 SMAP2 MXD1 THEMIS2 ITGAX RASSF2 HCK EVI2B TLR1 GLT1D1 HCLS1 TLR6 MNDA XPO6 NFAM1 NBEAL2 FPR2 WAS LRRK2 FPR1 ARRB2 STAT6 CDC42SE1 ZDHHC18 ADGRE5 LILRB3 SMCHD1 RNF149 VASP PLCB2 GMIP C10ORF54 PTAFR ALO…	6.13283e-07	#440154	0.5	0	12	3.60617		85	8.09072	-0.722231	Cluster 0	Regulation Of Adipose Tissue Development (GO:1904177)	NCOA2 SPI1 NCOA1 LCP1 PARP1 PPARG PLAAT3 SORL1 SIRT1 PRKAA1 TRPM4 LCP1 SORL1 SSH2 DOCK8 NCF2 TLR8 PTPRC LYN MYO1F ARAP1 IL17RA CSF2RB WIPF1 DOCK2 FAM65B TNFRSF10C NADK FMNL1 VNN2 CTSS ARHGAP30 P2RY13 SMAP2 MXD1 THEMIS2 ITGAX RASSF2 HCK EVI2B TLR1 GLT1D1 HCLS1 TLR6 MNDA XPO6 NFAM1 NBEAL2 FPR2 WAS LRRK2 FPR1 ARRB2 STAT6 CDC42SE1 ZDHHC18 ADGRE5 LILRB3 SMCHD1 RNF149 VASP PLCB2 GMIP C10ORF54 PTAFR ALO…	0.0651359	#440154	0.5	0	5	1.09309
4245	10.7953	-1.18732	Cluster 10	Negative Regulation Of Alcohol Biosynthetic Process (GO:1902931)	BMP5 CYP27B1 BMP2 PLEK SH2D2A REST GFI1 ERLIN2 ERLIN1 NFKB1 DKK3 SOD1 NFKB1 PLEK CYP27B1 GFI1 ERLIN1 TRAF1 ZC3H12A DUSP5 TNIP1 CD274 RNF19B NFKB2 SQRDL BMP2 ATP13A3 PTGS2 IL1RN ICAM1 LAMP1 SOCS3 ERLIN2 REST MAPKAPK2 SLAMF7 PLAUR MSC TNF EMILIN2 AMPD3 IL1B PTPN1 MAN2B1 EHD1 ZDHHC5 PIM3 IRAK2 SH2D2A IER3 BMP5 PI4K2B CCRL2 CCL3 PFKFB3 OASL DRAM1 TICAM1 ADORA2A RELB NFKBIE GPR84 CCR5 LCP2 WDR1 CD40 U…	5.46493e-05	#aec7e8	0.5	0	12	2.63121		86	8.67814	-1.74277	Cluster 0	Regulation Of Adaptive Immune Response (GO:0002819)	AKIRIN2 RIPK3 ALOX15 EIF2AK4 AHR SIRT1 SAMSN1 IL4I1 PYCARD IRF1 FCGR2B TNFSF4 FADD TRIM27 IRF7 IL6ST SKAP1 SASH3 LAPTM5 HCLS1 LSP1 CD53 HCK SASH3 THEMIS2 HLA.E HLA.A LCP1 GPSM3 PTPN6 LGALS9 TAP1 PIK3R5 LYN CYTH4 TNFRSF1B IRF1 WAS NCF2 ARHGAP30 HLA.B LILRB2 WIPF1 TCIRG1 PPP1R18 FMNL1 MYO1G RASSF5 STXBP2 IL10RA STX11 NCF1 ADAM8 CYTH1 ARAP1 IRF7 CORO1A VASP ITGAX RIN3 RPS6KA1 SPI1 PRKCD ELF4 GMIP AR…	1.79475e-05	#440154	0.5	0	12	2.873		86	8.67814	-1.74277	Cluster 0	Regulation Of Adaptive Immune Response (GO:0002819)	AKIRIN2 RIPK3 ALOX15 EIF2AK4 AHR SIRT1 SAMSN1 IL4I1 PYCARD IRF1 FCGR2B TNFSF4 FADD TRIM27 IRF7 IL6ST SKAP1 SASH3 LAPTM5 HCLS1 LSP1 CD53 HCK SASH3 THEMIS2 HLA.E HLA.A LCP1 GPSM3 PTPN6 LGALS9 TAP1 PIK3R5 LYN CYTH4 TNFRSF1B IRF1 WAS NCF2 ARHGAP30 HLA.B LILRB2 WIPF1 TCIRG1 PPP1R18 FMNL1 MYO1G RASSF5 STXBP2 IL10RA STX11 NCF1 ADAM8 CYTH1 ARAP1 IRF7 CORO1A VASP ITGAX RIN3 RPS6KA1 SPI1 PRKCD ELF4 GMIP AR…	0.0606988	#440154	0.5	0	5	1.10841
4246	10.275	-1.15226	Cluster 10	Negative Regulation Of Activated T Cell Proliferation (GO:0046007)	CD274 PRNP CRTAM PRKAR1A RC3H1 PDCD1LG2 SCRIB LILRB4 LGALS9 FOXP3 LILRB4 CD274 TNIP1 CTSZ CCR5 SLC15A3 NINJ1 SLAMF7 TRAF1 RNF19B PDCD1LG2 SIGLEC1 SQRDL ICAM1 CD68 BCL3 LILRB2 GRN NFKB2 MAN2B1 EHD1 SIRPA LGALS9 TYMP MSC CD40 DHX58 IL1RN AMPD3 MGAT1 CTSB RELB TNFAIP2 SPHK1 PILRA SBNO2 PLAUR TNFRSF1B OGFR MMP19 EMILIN2 SRC PFKFB3 ZC3H12A PSAP DRAM1 TICAM1 IL10RA GPR84 IL27 TAP1 LAMP1 PTPN1 GRINA IFI…	7.82132e-10	#aec7e8	0.5	0	12	5.05336		87	9.11479	-1.27654	Cluster 0	Negative Regulation Of Inflammatory Response (GO:0050728)	PTPN2 ISL1 MAPK14 FNDC4 LRFN5 SELENOS OTULIN TEK PTPN6 CD200 RB1 GPS2 AHR METRNL CXCL17 CDH5 ALOX5 NLRP3 SLAMF8 SLC39A8 CCN3 GHSR ELANE YES1 PRKCD PLK2 NR1D1 IGF1 MFHAS1 PROC IL22RA1 MKRN2 HLA-DRB1 GBA1 GATA3 RORA C1QTNF3 MMP26 RPS19 SIRPA FFAR4 PLCG1 APOE TRIM65 LYN IL10 IL13 IL10RA SIGLEC10 CD200R1 TNFRSF1A TNFRSF1B IL4 CYLD ELF4 APOA1 PYDC2 REG3A MEFV TNFAIP6 TNFAIP3 FPR2 NLRC3 TREM2 FXR1 MDK …	0.00192682	#440154	0.5	0	12	1.85758		87	9.11479	-1.27654	Cluster 0	Negative Regulation Of Inflammatory Response (GO:0050728)	PTPN2 ISL1 MAPK14 FNDC4 LRFN5 SELENOS OTULIN TEK PTPN6 CD200 RB1 GPS2 AHR METRNL CXCL17 CDH5 ALOX5 NLRP3 SLAMF8 SLC39A8 CCN3 GHSR ELANE YES1 PRKCD PLK2 NR1D1 IGF1 MFHAS1 PROC IL22RA1 MKRN2 HLA-DRB1 GBA1 GATA3 RORA C1QTNF3 MMP26 RPS19 SIRPA FFAR4 PLCG1 APOE TRIM65 LYN IL10 IL13 IL10RA SIGLEC10 CD200R1 TNFRSF1A TNFRSF1B IL4 CYLD ELF4 APOA1 PYDC2 REG3A MEFV TNFAIP6 TNFAIP3 FPR2 NLRC3 TREM2 FXR1 MDK …	0.603087	#440154	0.5	0	5	0.60981
4247	10.8063	-1.33755	Cluster 10	Negative Regulation Of T-helper 17 Type Immune Response (GO:2000317)	IL4 ZC3H12A TBX21 RC3H1 RC3H2 SMAD7 SMAD7 ZC3H12A RC3H1 TBX21 RUNX3 RNF19B TRAF1 RC3H2 NFKB1 NFKB2 TNF IL4 MTF1 TNIP1 ICAM1 SOCS3 RNPEPL1 PIK3R5 BCL3 KIR2DL1 EHD1 SOD2 PFKFB3 IL1RN SLAMF7 TNFAIP2 GPR132 PARP15 PLAUR MMP19 IER3 BCL2A1 IL10RA PIM3 AMPD3 IRAK2 NINJ1 RELB CD274 TNFRSF1B CSRNP1 SBNO2 GPR84 IL27 LILRB2 NR4A3 ADORA2A TICAM1 IL10 RAB29 BFSP1 MSC SLAMF1 PTGS2 GADD45B CCR5 ACOD1 NIPAL4 PIL…	0.000134201	#aec7e8	0.5	0	12	2.43612		88	9.27585	-1.28758	Cluster 0	Negative Regulation Of Interleukin-6 Production (GO:0032715)	IL10 NMB IL37 NCKAP1L NMBR FOXJ1 LILRB4 CD200R1 NLRP12 ELF4 SELENOS SYT11 TLR9 BPI GHRL PTPN6 GAS6 TLR4 CD200 SLAMF1 CD84 ORM1 C5AR2 TNFAIP3 PTPN22 TNF GBA1 CX3CL1 NLRC3 C1QTNF3 ZC3H12A IRAK3 SIRPA GHSR TNFRSF1B HCK PIK3R5 PILRA LILRB2 NCF2 LAPTM5 OSCAR ITGAX IL10RA ADGRE2 TLR2 THEMIS2 C5AR1 LILRB3 SLC15A3 LYN STX11 SIGLEC9 CYTH4 CTSS HCLS1 FMNL1 SPI1 NCKAP1L NOD2 RNF19B ARRB2 CD4 NINJ1 MAN2B1 TL…	3.38354e-07	#440154	0.5	0	12	3.73531		88	9.27585	-1.28758	Cluster 0	Negative Regulation Of Interleukin-6 Production (GO:0032715)	IL10 NMB IL37 NCKAP1L NMBR FOXJ1 LILRB4 CD200R1 NLRP12 ELF4 SELENOS SYT11 TLR9 BPI GHRL PTPN6 GAS6 TLR4 CD200 SLAMF1 CD84 ORM1 C5AR2 TNFAIP3 PTPN22 TNF GBA1 CX3CL1 NLRC3 C1QTNF3 ZC3H12A IRAK3 SIRPA GHSR TNFRSF1B HCK PIK3R5 PILRA LILRB2 NCF2 LAPTM5 OSCAR ITGAX IL10RA ADGRE2 TLR2 THEMIS2 C5AR1 LILRB3 SLC15A3 LYN STX11 SIGLEC9 CYTH4 CTSS HCLS1 FMNL1 SPI1 NCKAP1L NOD2 RNF19B ARRB2 CD4 NINJ1 MAN2B1 TL…	0.801389	#440154	0.5	0	5	0.548078
4248	10.8064	-1.36383	Cluster 10	Negative Regulation Of T-helper 17 Cell Differentiation (GO:2000320)	IL4 ZC3H12A TBX21 RC3H1 RC3H2 SMAD7 LOXL3 SMAD7 ZC3H12A RC3H1 TBX21 TRAF1 RUNX3 RNF19B NFKB2 NFKB1 RC3H2 ICAM1 TNIP1 EHD1 TNF SOCS3 PLAUR PFKFB3 MTF1 IER3 LOXL3 IL4 BCL3 PIK3R5 RNPEPL1 IL1RN SLAMF7 MMP19 GPR132 TNFAIP2 SOD2 KIR2DL1 NINJ1 AMPD3 MSC BCL2A1 RELB CD274 GPR84 IL10RA IRAK2 TNFRSF1B LILRB2 PIM3 TICAM1 SBNO2 PARP15 IL27 IL10 PILRA GADD45B CSRNP1 ADORA2A PTGS2 CCR5 STX11 ACOD1 BFSP1 SLAMF…	1.76609e-06	#aec7e8	0.5	0	12	3.37649		89	8.6013	-1.27301	Cluster 0	Negative Regulation Of Interleukin-8 Production (GO:0032717)	MAP2K5 IL10 ANXA4 MAPKBP1 OTUD7B PTPN22 SSC5D KLF4 TMSB4X ARRB1 BCL3 TLR9 BPI CACTIN TLR6 CD33 ELANE HCK BCL3 AP5B1 FMNL1 THEMIS2 ARAP1 APOBR TNFRSF1B LILRB3 LILRB2 SPI1 IL17RA STX11 LAPTM5 STAT6 ARRB2 ITGAX OSCAR TCIRG1 HCLS1 PLCB2 GMIP MYO1F MYO9B PRKCD WAS NCF2 C10ORF54 NOD2 SBNO2 MAN2B1 PILRA GPSM3 STXBP2 AOAH RIN3 ELF4 PIK3R5 PARVG LGALS9 CFP ARHGAP27 FGR LYN CYTH4 GRK2 ADGRE2 EFHD2 RELT NCF…	1.26132e-05	#440154	0.5	0	12	2.94959		89	8.6013	-1.27301	Cluster 0	Negative Regulation Of Interleukin-8 Production (GO:0032717)	MAP2K5 IL10 ANXA4 MAPKBP1 OTUD7B PTPN22 SSC5D KLF4 TMSB4X ARRB1 BCL3 TLR9 BPI CACTIN TLR6 CD33 ELANE HCK BCL3 AP5B1 FMNL1 THEMIS2 ARAP1 APOBR TNFRSF1B LILRB3 LILRB2 SPI1 IL17RA STX11 LAPTM5 STAT6 ARRB2 ITGAX OSCAR TCIRG1 HCLS1 PLCB2 GMIP MYO1F MYO9B PRKCD WAS NCF2 C10ORF54 NOD2 SBNO2 MAN2B1 PILRA GPSM3 STXBP2 AOAH RIN3 ELF4 PIK3R5 PARVG LGALS9 CFP ARHGAP27 FGR LYN CYTH4 GRK2 ADGRE2 EFHD2 RELT NCF…	0.314894	#440154	0.5	0	5	0.750918
4249	10.649	-0.569396	Cluster 10	Positive Regulation Of Membrane Protein Ectodomain Proteolysis (GO:0051044)	GPLD1 FURIN NRDC SNX33 TNF TNFRSF1B ADRA2A IL1B IFNG PACSIN3 APOE ADAM9 SH3D19 SNX9 SNX9 LAMP1 TRIP10 TNIP1 PFKFB3 MAPKAPK2 IER3 TMBIM1 SRC SPHK1 FURIN MGAT1 CTSZ CEBPB EHD1 ZC3H12A IL1B ICAM1 NUCB1 PLAUR TNF SBNO2 PLEKHM2 SPSB1 BCL3 SDF4 MMP19 METRNL CHMP4B SNX33 TOM1 NFKB2 TICAM1 GRN AMPD3 SQRDL ZDHHC5 MMP14 NINJ1 GPR84 MAN2B1 IRAK2 CD68 ARHGAP31 CXCL3 CD274 PIM3 PSAP ATP13A3 SLC15A3 GRINA ABCD…	7.59016e-07	#aec7e8	0.5	0	12	3.55987		90	9.69373	-0.935917	Cluster 0	Regulation Of Ceramide Biosynthetic Process (GO:2000303)	SAMD8 PRKCD SPHK2 ORMDL3 SPHK1 ORMDL1 ORMDL2 PLA2G6 SIRT3 PRKCD TYMP TNFRSF1B BCL3 SPHK1 NINJ1 PLA2G6 TCIRG1 EHD1 OSCAR ORMDL3 PILRA TNIP1 SBNO2 TNFRSF14 SPHK2 OGFR LILRB2 MGAT1 HCK GRN UNC93B1 PIK3R5 SLC15A3 ORMDL2 MAN2B1 PARP10 NFKB2 RELB FCGRT SLC43A2 SIRT3 SPI1 TOM1 CEBPB SLC2A6 ARSA ADORA2A MAP2K3 GRAMD1A LAPTM5 ARAP1 RHOG ABCD1 CTSZ EFHD2 ARHGAP4 LILRB3 STXBP2 AMPD3 CYBA ABCA7 HLA.A AP5Z1 O…	1.56064e-05	#440154	0.5	0	12	2.90335		90	9.69373	-0.935917	Cluster 0	Regulation Of Ceramide Biosynthetic Process (GO:2000303)	SAMD8 PRKCD SPHK2 ORMDL3 SPHK1 ORMDL1 ORMDL2 PLA2G6 SIRT3 PRKCD TYMP TNFRSF1B BCL3 SPHK1 NINJ1 PLA2G6 TCIRG1 EHD1 OSCAR ORMDL3 PILRA TNIP1 SBNO2 TNFRSF14 SPHK2 OGFR LILRB2 MGAT1 HCK GRN UNC93B1 PIK3R5 SLC15A3 ORMDL2 MAN2B1 PARP10 NFKB2 RELB FCGRT SLC43A2 SIRT3 SPI1 TOM1 CEBPB SLC2A6 ARSA ADORA2A MAP2K3 GRAMD1A LAPTM5 ARAP1 RHOG ABCD1 CTSZ EFHD2 ARHGAP4 LILRB3 STXBP2 AMPD3 CYBA ABCA7 HLA.A AP5Z1 O…	0.235385	#440154	0.5	0	5	0.814111
4250	10.5326	-0.672042	Cluster 10	Regulation Of Brown Fat Cell Differentiation (GO:0090335)	FTO NAPEPLD HNRNPU SIX1 SOX13 METRNL SIRT1 INS PTGS2 FLCN FNDC5 LEP TFE3 PIM1 RREB1 ZBTB7B VSTM2A FLCN TFE3 METRNL RREB1 PFKFB3 CEBPB ARHGEF11 SBNO2 MAPKAPK2 UBR4 EHBP1L1 PTGS2 FOSL2 PLEKHM2 ACSL1 SOD2 MAFG TNS1 ZC3H12A SRRM2 CFLAR SRCAP KDM2A G0S2 DNM2 TMEM127 STK40 TNIP1 GAK MYO9B BCL3 KDM6B WASH5P ARHGEF2 SIRT1 PIM1 TRIP10 SOCS3 SUPT6H DOT1L RXRA ZSWIM8 RNF19B AMPD3 SOX13 KLHL21 PNPLA2 SLC43A2…	0.0581166	#aec7e8	0.5	0	5	1.11785		91	8.1135	-0.117451	Cluster 0	Regulation Of Erythrocyte Differentiation (GO:0045646)	STAT5B MED1 LYN HSPA9 BRD1 STAT1 NCKAP1L STAT3 ARNT INHBA PRMT1 MAFB ZNF16 ACVR2A MAPK14 MAPK11 FAM210B ZFPM1 CDK6 TAL1 HSPA1A HSPA1B SPI1 LDB1 ZFP36L1 PRKDC HMGB2 ETS1 HIF1A FOXO3 ACVR1B GATA1 RHEX ZFP36 ANKRD54 HOXA5 STAT5B KLF13 TLN1 MYO9B ELF4 ARAP1 GRK2 EHBP1L1 TRAPPC10 FMNL1 TGFB1 DNM2 NBEAL2 PBX2 MCL1 TYK2 DOCK2 PPP6R1 LDB1 VASP SMAP2 LYN ARHGEF2 GRK6 STAT6 GNAI2 FBRS SUN2 SBNO2 NCKAP1L AP…	7.11326e-06	#440154	0.5	0	12	3.07397		91	8.1135	-0.117451	Cluster 0	Regulation Of Erythrocyte Differentiation (GO:0045646)	STAT5B MED1 LYN HSPA9 BRD1 STAT1 NCKAP1L STAT3 ARNT INHBA PRMT1 MAFB ZNF16 ACVR2A MAPK14 MAPK11 FAM210B ZFPM1 CDK6 TAL1 HSPA1A HSPA1B SPI1 LDB1 ZFP36L1 PRKDC HMGB2 ETS1 HIF1A FOXO3 ACVR1B GATA1 RHEX ZFP36 ANKRD54 HOXA5 STAT5B KLF13 TLN1 MYO9B ELF4 ARAP1 GRK2 EHBP1L1 TRAPPC10 FMNL1 TGFB1 DNM2 NBEAL2 PBX2 MCL1 TYK2 DOCK2 PPP6R1 LDB1 VASP SMAP2 LYN ARHGEF2 GRK6 STAT6 GNAI2 FBRS SUN2 SBNO2 NCKAP1L AP…	0.0606988	#440154	0.5	0	5	1.10841
4251	10.7734	-0.615147	Cluster 10	Positive Regulation Of Natural Killer Cell Mediated Cytotoxicity Directed Against Tumor Cell Target (GO:0002860)	CRTAM PVR IL12B IL12A NECTIN2 NECTIN2 PVR IL12B IL12A CRTAM TRIP10 TNIP1 CD274 SPSB1 BIRC3 FAM129B CYP27B1 SLC4A2 SPHK1 BCAR1 ACTN4 AKT1S1 UBE2Z ABTB2 SRC IER3 LAMP1 PTPN1 ICAM1 SDF4 SLAMF7 PDGFB SEC61A1 GRAMD1A GRINA TNFRSF12A P4HB PDCD1LG2 MYO1C MGAT4B CD151 CLPTM1 AGRN EHD1 IL1RN SURF4 NACC1 CLCF1 IL27 ACTN1 IRAK1 ZDHHC5 LRRC59 SLC39A7 MMP14 NINJ1 ZC3H12A C17ORF96 TRAF1 TSPAN4 INF2 WDR1 TMEM63…	6.54887e-05	#aec7e8	0.5	0	12	2.59192		92	8.22325	-1.26111	Cluster 0	Negative Regulation Of Lipopolysaccharide-Mediated Signaling Pathway (GO:0031665)	LACRT DEFB118 NFKBIL1 DEFB114 CARD8 CARD16 LILRA2 LTF SIGIRR TRIB1 LILRA2 ARRB2 C10ORF54 GPSM3 FMNL1 WAS THEMIS2 MYO1F CFP ADGRG3 NFAM1 ARHGAP30 LRRC25 IL17RA CORO1A EVI2B LILRB3 ADGRE5 ICAM3 FGR PLCB2 DPEP2 HLA.E NCF1B SIRPB1 SPI1 APOBR HCK PSTPIP1 CCDC88B ARHGAP9 CEACAM3 HCLS1 CARD8 ABTB1 P2RY13 FPR1 ARHGAP45 SELPLG RASGRP4 ARHGAP27 ADAM8 SIGIRR SIGLEC5 PLBD1 LILRA1 NCF4 ALOX5 GMIP ITGAX CYTH4 …	0.000473652	#440154	0.5	0	12	2.16227		92	8.22325	-1.26111	Cluster 0	Negative Regulation Of Lipopolysaccharide-Mediated Signaling Pathway (GO:0031665)	LACRT DEFB118 NFKBIL1 DEFB114 CARD8 CARD16 LILRA2 LTF SIGIRR TRIB1 LILRA2 ARRB2 C10ORF54 GPSM3 FMNL1 WAS THEMIS2 MYO1F CFP ADGRG3 NFAM1 ARHGAP30 LRRC25 IL17RA CORO1A EVI2B LILRB3 ADGRE5 ICAM3 FGR PLCB2 DPEP2 HLA.E NCF1B SIRPB1 SPI1 APOBR HCK PSTPIP1 CCDC88B ARHGAP9 CEACAM3 HCLS1 CARD8 ABTB1 P2RY13 FPR1 ARHGAP45 SELPLG RASGRP4 ARHGAP27 ADAM8 SIGIRR SIGLEC5 PLBD1 LILRA1 NCF4 ALOX5 GMIP ITGAX CYTH4 …	0.0070769	#440154	0.5	0	12	1.57508
4252	10.6046	-1.48843	Cluster 10	Plasma Membrane Phospholipid Scrambling (GO:0017121)	P2RX7 PLSCR2 PLSCR1 PLSCR4 PLSCR3 PLSCR5 ANO7 PLSCR1 PLSCR2 RP11.758I14.3 P2RX7 PLSCR4 PLSCR5 ANO7 N4BP2L1 RP3.395C13.1 CAPZA2 LRRC70 RHOBTB3 DKK4 CER1 BCKDHB HTR6 SERHL2 SOD2 SERPINB9 CCR5 RIPPLY1 SLAMF7 GBP1 SERINC5 IL10 MCFD2 CD274 CMPK2 LILRB4 RAP2C APOL6 ICAM1 ESRRAP2 LRRCC1 NAB1 OASL RSAD2 RNF19B GBP4 ACOX3 EPSTI1 GYPE DHX58 CTD.2311M21.2 LAP3 STAT2 ACOD1 RAD17P1 FLVCR2 RFPL2 IFIT3 IL27 KLK…	0.000329584	#aec7e8	0.5	0	12	2.24102		93	8.11838	-1.98523	Cluster 0	Positive Regulation Of Cell Adhesion Mediated By Integrin (GO:0033630)	RET FOXC2 TGFB2 P2RY12 SYK NCKAP1L CCL21 PIEZO1 LIF CIB1 CD3E SFRP2 CXCL13 PODXL CCL5 RAC3 SKAP1 CSK CD3E WIPF1 ARPC1B GNAI2 PPP6R1 GRK2 TGFB1 TLN1 SH3BP1 WDR1 HCLS1 CAPZB NCKAP1L ARHGEF1 ARHGAP4 SEPT9 CORO1A ARHGAP45 MYO9B SUN2 EML3 GAK HLA.A RASAL3 STAT6 DNM2 GRK6 MYH9 TMC6 DCAF15 RPS6KA1 MGAT1 PLCB2 PPP1R18 GPSM3 ATP2A3 ANXA11 NLRC5 DEF6 HLA.E ADCY7 DENND1C VASP RAC2 ARAP1 ARHGAP30 SIPA1 AKNA …	0.231716	#440154	0.5	0	5	0.817522		93	8.11838	-1.98523	Cluster 0	Positive Regulation Of Cell Adhesion Mediated By Integrin (GO:0033630)	RET FOXC2 TGFB2 P2RY12 SYK NCKAP1L CCL21 PIEZO1 LIF CIB1 CD3E SFRP2 CXCL13 PODXL CCL5 RAC3 SKAP1 CSK CD3E WIPF1 ARPC1B GNAI2 PPP6R1 GRK2 TGFB1 TLN1 SH3BP1 WDR1 HCLS1 CAPZB NCKAP1L ARHGEF1 ARHGAP4 SEPT9 CORO1A ARHGAP45 MYO9B SUN2 EML3 GAK HLA.A RASAL3 STAT6 DNM2 GRK6 MYH9 TMC6 DCAF15 RPS6KA1 MGAT1 PLCB2 PPP1R18 GPSM3 ATP2A3 ANXA11 NLRC5 DEF6 HLA.E ADCY7 DENND1C VASP RAC2 ARAP1 ARHGAP30 SIPA1 AKNA …	0.0140773	#440154	0.5	0	12	1.42574
4253	10.637	-0.689525	Cluster 10	Negative Regulation Of Signaling Receptor Activity (GO:2000272)	ZGPAT PPARA LILRB4 GPRC5A SLC6A9 PPARG VPS25 CHMP6 ERRFI1 TSG101 RAMP3 CLEC12B CNRIP1 HFE CBLC TNF CBLB CBL CRHBP CALCR ZFYVE28 EPHB2 SNX6 SOCS5 SOCS6 PLAUR ICAM1 MMP19 LILRB4 CD68 IER3 CTSZ SPHK1 NINJ1 GRN SQRDL SRC TMBIM1 EHD1 BCL3 SIGLEC1 C1QC FCGRT TRIP10 SLC15A3 AMPD3 ZC3H12A PFKFB3 SPSB1 GPR84 C1QA IL1RN METRNL FTL NIPAL4 TNF RNF19B CEBPB CTSB CCR5 RAB7B TNIP1 FOLR2 CD163 LGMN NPC2 CTSD CCR…	2.89919e-10	#aec7e8	0.5	0	12	5.26886		94	8.03237	-2.14154	Cluster 0	Negative Regulation Of Lipid Kinase Activity (GO:0090219)	RUBCN PIK3IP1 PIP4K2A PIP4K2B PIP4K2C WASHC1 PPP2R5A PIK3IP1 PIP4K2A RUBCN PPP2R5A WIPF1 PIP4K2C PTPRC HLA.E CYTH1 STK4 NLRC5 JAK3 ARHGAP45 PIP4K2B IPCEF1 FYB HCLS1 PIK3CD AKNA IKZF1 TCAF2P1 RASA3 SUN2 ARHGEF1 RASSF5 CDC42SE1 DOCK8 MBNL1 RASGRP2 SPOCK2 GPATCH8 ETS1 TMC6 ARHGAP30 TMC8 RASAL3 IL16 FAM65B RBL2 TRAF3IP3 TXNIP DGKA GPSM3 PBXIP1 GVINP1 SELPLG SMAP2 IL7R ASTN1 PRKCH CD3E BTN3A1 CDC42SE2…	0.0193116	#440154	0.5	0	12	1.35709		94	8.03237	-2.14154	Cluster 0	Negative Regulation Of Lipid Kinase Activity (GO:0090219)	RUBCN PIK3IP1 PIP4K2A PIP4K2B PIP4K2C WASHC1 PPP2R5A PIK3IP1 PIP4K2A RUBCN PPP2R5A WIPF1 PIP4K2C PTPRC HLA.E CYTH1 STK4 NLRC5 JAK3 ARHGAP45 PIP4K2B IPCEF1 FYB HCLS1 PIK3CD AKNA IKZF1 TCAF2P1 RASA3 SUN2 ARHGEF1 RASSF5 CDC42SE1 DOCK8 MBNL1 RASGRP2 SPOCK2 GPATCH8 ETS1 TMC6 ARHGAP30 TMC8 RASAL3 IL16 FAM65B RBL2 TRAF3IP3 TXNIP DGKA GPSM3 PBXIP1 GVINP1 SELPLG SMAP2 IL7R ASTN1 PRKCH CD3E BTN3A1 CDC42SE2…	0.095765	#440154	0.5	0	5	1.0094
4254	10.8512	-0.703474	Cluster 10	Hyaluronan Metabolic Process (GO:0030212)	TGFB1 CEMIP TNFAIP6 FGF2 IL1B SPAM1 HYAL1 HYAL2 HAS2 HYAL4 HAS1 HAS3 CEMIP2 CD44 CD44 PTX3 IL1B SPHK1 MMP14 DRAM1 PTGS2 PLAUR ADM IL6 THBS1 TNFAIP6 IER3 FGF2 TNIP1 HAS1 CEMIP EHD1 CKAP4 ZC3H12A PDCD1LG2 ICAM1 ATP13A3 ITGB1 PXDC1 ANXA5 RCN3 ACTN1 LAMP1 SNX9 IRAK2 SOCS3 CXCL3 LTBP2 FN1 BCL3 GPR84 PFKFB3 SRC NINJ1 TPM4 MGAT1 SBNO2 FRMD6 TICAM1 ENG CLIC4 FSTL1 CXCL8 AKAP2 EFEMP2 EHD2 DSE TRIP10 RNF19…	0.000108024	#aec7e8	0.5	0	12	2.48324		95	9.55394	-1.24073	Cluster 0	Negative Regulation Of Leukocyte Proliferation (GO:0070664)	IL33 LYN GREM1 GSTP1 ENPP3 TNFAIP3 LILRB1 LILRB1 LYN LILRB2 TNFRSF1B PIK3R5 HCK TNFAIP3 TNIP1 NOD2 PILRA TLR2 IL10RA TNFAIP2 ADGRE2 NFKB2 THEMIS2 STX11 MX2 TLR8 NCF2 LAPTM5 RNF19B TRAF1 PIK3AP1 BCL3 LITAF LILRB3 MYO9B CTSS ITGAX SLC15A3 MYO1G SIGLEC9 CYTH1 ZC3H12A EHD1 NINJ1 MSC OSCAR ARAP1 PRKCD ELF4 AMPD3 TNFRSF14 SLC43A2 FMNL1 PLEKHO2 FGR TYMP C5AR1 MPEG1 TAP1 EMILIN2 RELB NFKB1 CD274 PTAFR RA…	5.38712e-14	#440154	0.5	0	12	7.13432		95	9.55394	-1.24073	Cluster 0	Negative Regulation Of Leukocyte Proliferation (GO:0070664)	IL33 LYN GREM1 GSTP1 ENPP3 TNFAIP3 LILRB1 LILRB1 LYN LILRB2 TNFRSF1B PIK3R5 HCK TNFAIP3 TNIP1 NOD2 PILRA TLR2 IL10RA TNFAIP2 ADGRE2 NFKB2 THEMIS2 STX11 MX2 TLR8 NCF2 LAPTM5 RNF19B TRAF1 PIK3AP1 BCL3 LITAF LILRB3 MYO9B CTSS ITGAX SLC15A3 MYO1G SIGLEC9 CYTH1 ZC3H12A EHD1 NINJ1 MSC OSCAR ARAP1 PRKCD ELF4 AMPD3 TNFRSF14 SLC43A2 FMNL1 PLEKHO2 FGR TYMP C5AR1 MPEG1 TAP1 EMILIN2 RELB NFKB1 CD274 PTAFR RA…	0.189843	#440154	0.5	0	5	0.860802
4255	10.5882	-0.917155	Cluster 10	Response To Organonitrogen Compound (GO:0010243)	CHRNB2 XBP1 RHBDD1 MRGPRX1 NR1H4 SYVN1 MEAK7 TRPV1 MTOR CREB1 IL6 IRF5 RRAGC RCAN3 ADORA2A DNAJB12 RNF185 ATF6 BRSK2 PRKN VCP CHRNA3 ATF1 CCDC47 SEL1L CHRNA7 CLU DERL1 RNF5 SEL1L2 INAVA GLRA2 GPRC6A GLRA3 HLCS IRAK3 RNF139 ERLEC1 KYNU ADORA1 DRD2 KAT7 DRD3 DRD4 GPIHBP1 UBXN6 MARCHF6 GRINA TNIP1 ADORA2A RNF19B TMEM127 SLC43A2 SOD2 MAPKAPK2 SIRPA PFKFB3 SEL1L SYVN1 ZC3H12A ARL8A NINJ1 PLEKHM2 EHD1 …	4.13639e-05	#aec7e8	0.5	0	12	2.69169		96	8.45931	-1.50956	Cluster 0	Negative Regulation Of Leukocyte Mediated Cytotoxicity (GO:0001911)	CLEC12B CX3CR1 LILRB1 HLA-G KIR2DL4 HLA-E HLA-F PTPRC FCGR2B CEACAM1 KLRD1 KLRC1 LGALS9 MICA AOAH HCLS1 HLA.E PTPRC HCK FGR THEMIS2 ITGAX CTSS DOCK8 CYTH4 ARHGAP30 NCF2 LYN TLR8 LCP1 LAPTM5 APOBR CD53 LILRB2 WIPF1 DOCK2 TNFRSF1B MYO1F TLR2 PLCB2 ARRB2 SIGLEC9 LILRB3 JAML LGALS9 EVI2B IL17RA LILRB1 FMNL1 ADCY7 MPEG1 WAS NCKAP1L PTPN6 ADGRE2 LILRA6 CDC42SE1 ARAP1 RASSF5 GPSM3 FAM65B PSTPIP1 AKNA CS…	3.51903e-08	#440154	0.5	0	12	4.22679		96	8.45931	-1.50956	Cluster 0	Negative Regulation Of Leukocyte Mediated Cytotoxicity (GO:0001911)	CLEC12B CX3CR1 LILRB1 HLA-G KIR2DL4 HLA-E HLA-F PTPRC FCGR2B CEACAM1 KLRD1 KLRC1 LGALS9 MICA AOAH HCLS1 HLA.E PTPRC HCK FGR THEMIS2 ITGAX CTSS DOCK8 CYTH4 ARHGAP30 NCF2 LYN TLR8 LCP1 LAPTM5 APOBR CD53 LILRB2 WIPF1 DOCK2 TNFRSF1B MYO1F TLR2 PLCB2 ARRB2 SIGLEC9 LILRB3 JAML LGALS9 EVI2B IL17RA LILRB1 FMNL1 ADCY7 MPEG1 WAS NCKAP1L PTPN6 ADGRE2 LILRA6 CDC42SE1 ARAP1 RASSF5 GPSM3 FAM65B PSTPIP1 AKNA CS…	0.0317009	#440154	0.5	0	12	1.24946
4256	10.558	-1.54373	Cluster 10	Regulation Of T-helper 2 Cell Cytokine Production (GO:2000551)	IL4 PRKCZ IL6 IFNA2 DENND1B XCL1 TBX21 RSAD2 NLRP3 IFNB1 RSAD2 IFNB1 IFIT2 IFIT3 OASL IL6 DHX58 CMPK2 RNF19B TNF SLAMF7 IL1B IL27 ACOD1 ZC3H12A TRAF1 CXCL11 NFKB1 HELZ2 MX2 OAS2 CCRL2 NLRP3 IL1RN BCL2A1 ICAM1 MX1 IFIH1 PTGS2 CD274 GPR84 IL10RA IL10 LILRB2 PLAUR SOD2 EPSTI1 CCR5 IRAK2 SOCS3 TNIP3 PFKFB3 ISG20 NINJ1 NEURL3 GBP1 SOCS1 OAS3 STX11 TNFAIP8 CXCL10 LILRB4 EHD1 GPR132 ADORA2A CCL3L3 SIGLE…	2.3551e-12	#aec7e8	0.5	0	12	6.31399		97	8.72846	-0.971141	Cluster 0	Regulation Of Dopamine Metabolic Process (GO:0042053)	ITGB2 CHRNB2 PRKN HPRT1 HTR1A ITGAM DRD4 ITGB2 ITGAM HTR1A SIGLEC9 CHRNB2 HK3 MYO1F FGR ITGAX SNX20 ARRB2 DRD4 NCF2 GSDMD PLCB2 OSCAR SIRPA HCK SPI1 IL17RA ARAP1 RPS6KA1 LILRB3 APOBR PTPRE THEMIS2 FMNL1 LRRC25 HPRT1 PLBD1 PPM1M CCR1 MT1XP1 ADCY7 CD4 AOAH CYBB CTSS NFAM1 C5AR1 CECR1 CFP PLEKHO2 PIK3R5 CD300LB TLR8 AC108039.3 C10ORF54 LILRA6 ALOX5 EFHD2 CSF2RB HRH2 FCN1 LILRB2 NLRC4 UNK MPEG1 RP5.8…	8.72985e-07	#440154	0.5	0	12	3.5295		97	8.72846	-0.971141	Cluster 0	Regulation Of Dopamine Metabolic Process (GO:0042053)	ITGB2 CHRNB2 PRKN HPRT1 HTR1A ITGAM DRD4 ITGB2 ITGAM HTR1A SIGLEC9 CHRNB2 HK3 MYO1F FGR ITGAX SNX20 ARRB2 DRD4 NCF2 GSDMD PLCB2 OSCAR SIRPA HCK SPI1 IL17RA ARAP1 RPS6KA1 LILRB3 APOBR PTPRE THEMIS2 FMNL1 LRRC25 HPRT1 PLBD1 PPM1M CCR1 MT1XP1 ADCY7 CD4 AOAH CYBB CTSS NFAM1 C5AR1 CECR1 CFP PLEKHO2 PIK3R5 CD300LB TLR8 AC108039.3 C10ORF54 LILRA6 ALOX5 EFHD2 CSF2RB HRH2 FCN1 LILRB2 NLRC4 UNK MPEG1 RP5.8…	0.162797	#440154	0.5	0	5	0.894177
4257	10.7536	-0.797416	Cluster 10	Positive Regulation Of Cell-Cell Adhesion (GO:0022409)	FGB MAGI1 IL10 FGG SERPINF2 RNASE10 ANK3 PLAUR SMAD7 BMP7 IL1B TJP1 LCK CXCL13 CEACAM6 DENND6A CD47 NODAL SKAP1 PLPP3 CD44 FOXA2 PTPRU FOXA1 CITED2 PIEZO1 SIRPG GCNT2 MEGF10 PTPN23 TNF FSTL3 THY1 AGER FUT3 CX3CL1 CD3E AFD1 FUT7 MDK PODXL CCL5 TNFSF11 FLOT1 FGA JAK1 NUCB1 SBNO2 NECTIN2 BCL3 OGFR SDF4 RRBP1 ARHGEF11 TNIP1 EHD1 TMEM63B ZC3H12A FGA MAPKAPK2 FGB SRC GRINA GRAMD1A SEPT9 SPSB1 FGG ICAM1…	0.0144591	#aec7e8	0.5	0	12	1.41993		98	8.74737	-1.33148	Cluster 0	Negative Regulation Of Leukocyte Degranulation (GO:0043301)	SPI1 CD84 FCGR2B CEACAM1 CD300A NCKAP1L LGALS9 HLA-F LGALS9 NCKAP1L SPI1 LAPTM5 HCK APOBR THEMIS2 ITGAX SLC15A3 NCF2 PLEKHO2 OSCAR WAS ARAP1 HCLS1 PLCB2 ARRB2 PILRA SIGLEC9 CYTH4 CCR1 MAN2B1 PTPN6 TCIRG1 CTSS PIK3R5 HK3 GPSM3 TNFRSF1B FMNL1 FGR RPS6KA1 ARHGAP30 GMIP FCGR2B ITGAM MYO1F MYO9B LILRB3 LRRC25 NPL LYN LSP1 C5AR1 ALOX5 LCP1 CD4 IFI30 CYBB EFHD2 NCF4 DOCK2 AOAH IL17RA RIN3 TLR2 PRKCD CD8…	5.83206e-08	#440154	0.5	0	12	4.11709		98	8.74737	-1.33148	Cluster 0	Negative Regulation Of Leukocyte Degranulation (GO:0043301)	SPI1 CD84 FCGR2B CEACAM1 CD300A NCKAP1L LGALS9 HLA-F LGALS9 NCKAP1L SPI1 LAPTM5 HCK APOBR THEMIS2 ITGAX SLC15A3 NCF2 PLEKHO2 OSCAR WAS ARAP1 HCLS1 PLCB2 ARRB2 PILRA SIGLEC9 CYTH4 CCR1 MAN2B1 PTPN6 TCIRG1 CTSS PIK3R5 HK3 GPSM3 TNFRSF1B FMNL1 FGR RPS6KA1 ARHGAP30 GMIP FCGR2B ITGAM MYO1F MYO9B LILRB3 LRRC25 NPL LYN LSP1 C5AR1 ALOX5 LCP1 CD4 IFI30 CYBB EFHD2 NCF4 DOCK2 AOAH IL17RA RIN3 TLR2 PRKCD CD8…	0.0140773	#440154	0.5	0	12	1.42574
4258	10.9224	-0.48368	Cluster 10	Negative Regulation Of Smooth Muscle Cell Proliferation (GO:0048662)	TGFB3 IL10 MEF2C PTGIR IGFBP5 IGFBP3 APLN SOD2 BMP4 TAFA5 BMP2 OGN IFNG PPARG ANG PDCD4 VIP TRIB1 BMPR2 CDKN1B NDRG4 CDKN1A TNFAIP3 PTEN AIF1 CNN1 EFEMP2 GPER1 MFN2 HMOX1 TPM1 APOE IL12B IL12A PPARGC1A APOD PRKG1 ARHGAP31 SPSB1 PFKFB3 LAMP1 PLEKHM2 ICAM1 PXDC1 KLF9 LRP1 TNIP1 TRIP10 MYL9 CDKN1A EFEMP2 MAPKAPK2 DRAM1 LAMB2 ENG SOCS3 SAMD4A MMP19 SIRPA TNS1 CD274 PDE4DIP SPHK1 TOM1 NUCB1 TIMP2 MSC …	5.22777e-06	#aec7e8	0.5	0	12	3.14084		99	8.39739	-1.91311	Cluster 0	Negative Regulation Of Leukocyte Cell-Cell Adhesion (GO:1903038)	DUSP3 PPARA VTCN1 FGL1 ILDR2 LAPTM5 PTPN22 MIA3 LAX1 IL4I1 ASS1 WNK1 GPNMB AKT1 TNFAIP8L2 CTSG JAK3 TIGIT PAG1 LAPTM5 CYTH1 HCLS1 JAK3 ARHGAP30 WIPF1 NLRC5 RASSF5 ARAP1 PTPN6 ARHGAP45 DOCK8 LCP1 HLA.A NCKAP1L DOCK2 HLA.E STAT6 CD53 PTPRC GRK2 AKNA TNFRSF14 FMNL1 KLF13 LSP1 CDC42SE1 PIK3CD SUN2 CSK MYO9B HLA.B TCIRG1 CORO1A TEP1 PTPN22 IKZF1 PSD4 THEMIS2 GBP2 PIK3R5 IL17RA GPSM3 AOAH RASAL3 RPS6KA…	0.000473652	#440154	0.5	0	12	2.16227		99	8.39739	-1.91311	Cluster 0	Negative Regulation Of Leukocyte Cell-Cell Adhesion (GO:1903038)	DUSP3 PPARA VTCN1 FGL1 ILDR2 LAPTM5 PTPN22 MIA3 LAX1 IL4I1 ASS1 WNK1 GPNMB AKT1 TNFAIP8L2 CTSG JAK3 TIGIT PAG1 LAPTM5 CYTH1 HCLS1 JAK3 ARHGAP30 WIPF1 NLRC5 RASSF5 ARAP1 PTPN6 ARHGAP45 DOCK8 LCP1 HLA.A NCKAP1L DOCK2 HLA.E STAT6 CD53 PTPRC GRK2 AKNA TNFRSF14 FMNL1 KLF13 LSP1 CDC42SE1 PIK3CD SUN2 CSK MYO9B HLA.B TCIRG1 CORO1A TEP1 PTPN22 IKZF1 PSD4 THEMIS2 GBP2 PIK3R5 IL17RA GPSM3 AOAH RASAL3 RPS6KA…	0.279944	#440154	0.5	0	5	0.776464
4259	10.6436	-1.02796	Cluster 10	Regulation Of Cell-Cell Adhesion Involved In Gastrulation (GO:0070587)	IL1RN MAP2K5 IL10 WNK1 APOA1 MYADM MAPK7 KLF4 MBL2 IL1RN BCL3 RNF19B IL27 PFKFB3 FOSL2 ICAM1 SOCS3 EHD1 IL10 SLAMF7 TNIP1 ZC3H12A TICAM1 NIPAL4 MMP19 LILRB2 KLF4 ACOD1 STX11 DHX58 PLAUR TNFAIP2 FFAR3 MAPK7 TRAF1 MAPKAPK2 SIGLEC1 ABTB2 SBNO2 AMPD3 MYADM ARHGEF11 GRAMD1A SPSB1 HELZ2 ELF4 MAN2B1 TNFRSF1B NINJ1 OGFR CSRNP1 IL10RA NFKB2 PTPN1 TNF TRIP10 CD274 PIM3 ELL SOD2 MGAT1 FCAMR GRN SPHK1 LILRB4…	3.07365e-06	#aec7e8	0.5	0	12	3.25617		100	9.41269	-1.40133	Cluster 0	Negative Regulation Of Leukocyte Apoptotic Process (GO:2000107)	CXCL12 CCL21 SELENOS HCLS1 LILRB1 NOD2 IRF7 CCR7 CCL19 MERTK GAS6 LILRB2 LILRB1 HCK TNFRSF1B NOD2 TAP1 LGALS9 TYMP PIK3R5 HCLS1 TCIRG1 IL10RA TNFRSF14 PILRA IRF7 HLA.A THEMIS2 LAPTM5 BCL3 TNIP1 MYO9B LYN STAT6 ARAP1 MGAT1 SLC15A3 PLEKHO2 UNC93B1 HLA.B PRKCD MAN2B1 PARP10 OSCAR NFKB2 SECTM1 MX2 CYTH4 NCF2 RELB PPP1R18 SPI1 GMIP FMNL1 LILRB3 CYTH1 DHX58 TLR2 CD4 GPSM3 HLA.E SBNO2 MPEG1 MYO1G RNF19B…	1.8257e-07	#440154	0.5	0	12	3.86928		100	9.41269	-1.40133	Cluster 0	Negative Regulation Of Leukocyte Apoptotic Process (GO:2000107)	CXCL12 CCL21 SELENOS HCLS1 LILRB1 NOD2 IRF7 CCR7 CCL19 MERTK GAS6 LILRB2 LILRB1 HCK TNFRSF1B NOD2 TAP1 LGALS9 TYMP PIK3R5 HCLS1 TCIRG1 IL10RA TNFRSF14 PILRA IRF7 HLA.A THEMIS2 LAPTM5 BCL3 TNIP1 MYO9B LYN STAT6 ARAP1 MGAT1 SLC15A3 PLEKHO2 UNC93B1 HLA.B PRKCD MAN2B1 PARP10 OSCAR NFKB2 SECTM1 MX2 CYTH4 NCF2 RELB PPP1R18 SPI1 GMIP FMNL1 LILRB3 CYTH1 DHX58 TLR2 CD4 GPSM3 HLA.E SBNO2 MPEG1 MYO1G RNF19B…	0.3909	#440154	0.5	0	5	0.703967
4260	10.6628	-0.946395	Cluster 10	Response To Organic Cyclic Compound (GO:0014070)	TGFB1 CHRNB2 TIPARP ANXA1 MRGPRX1 TRPV1 IL18 GH1 IL1B CYP24A1 ADORA2A ALPL CYP1A1 ADA TLR3 ABCB4 ATF1 SLC1A1 WNT8B CLU TNF AQP3 STRN3 SFRP1 HLCS SOCS2 CSN1S1 CYP1B1 ADORA1 SPP1 DRD2 DRD3 DRD4 STAT5B PAQR7 PAQR8 CDKN2D IGFBP5 STAT3 STING1 ESR1 CREB1 FGFR4 FOXA1 GLDC TP53I13 ALAS1 CTNNB1 CYP27B1 TPR BGLAP KYNU CCL5 NKX3-1 ARL6IP5 CCL3 CCL2 PMAIP1 ICAM1 ZC3H12A GPR84 NINJ1 TNF SQRDL AMPD3 PLAUR ADOR…	3.13195e-05	#aec7e8	0.5	0	12	2.75209		101	8.82274	-0.251288	Cluster 0	Extrinsic Apoptotic Signaling Pathway (GO:0097191)	TGFB1 CASP8AP2 TGFB2 BAD CD70 CRADD DELE1 HIPK1 TNFRSF1A RNF41 TNFRSF1B IL4 IFI27 FAS IFNG BCL2 BAX CD27 TLR3 DDX3X GSK3B GSK3A DIABLO DDX47 BCL2A1 TRADD TNF CIB1 CASP8 BCL2L10 CASP10 ERBB3 CASP2 FADD RIPK1 BOK MCL1 SMAD3 DAXX SORT1 PDPK1 G0S2 INHBA TNFRSF10B TNFRSF10A NGF DAB2IP P2RX7 MLLT11 BCL2L1 SIVA1 FGFR3 BCL2L2 GABARAP FASLG DEDD2 BAG3 BLOC1S2 TNFSF12 BAK1 ITGAV IL12A IL6R BID MOAP1 DEDD J…	1.28806e-07	#440154	0.5	0	12	3.94503		101	8.82274	-0.251288	Cluster 0	Extrinsic Apoptotic Signaling Pathway (GO:0097191)	TGFB1 CASP8AP2 TGFB2 BAD CD70 CRADD DELE1 HIPK1 TNFRSF1A RNF41 TNFRSF1B IL4 IFI27 FAS IFNG BCL2 BAX CD27 TLR3 DDX3X GSK3B GSK3A DIABLO DDX47 BCL2A1 TRADD TNF CIB1 CASP8 BCL2L10 CASP10 ERBB3 CASP2 FADD RIPK1 BOK MCL1 SMAD3 DAXX SORT1 PDPK1 G0S2 INHBA TNFRSF10B TNFRSF10A NGF DAB2IP P2RX7 MLLT11 BCL2L1 SIVA1 FGFR3 BCL2L2 GABARAP FASLG DEDD2 BAG3 BLOC1S2 TNFSF12 BAK1 ITGAV IL12A IL6R BID MOAP1 DEDD J…	0.00870252	#440154	0.5	0	12	1.53018
4261	10.425	-0.535045	Cluster 10	Positive Regulation Of Cellular Metabolic Process (GO:0031325)	PDGFRB PRELID1 ACTN3 IL10RB IFNLR1 MT3 ACOD1 SORD SIRT1 AGT TGFBR2 RNF41 MAPK14 IL4 SLCO1C1 PAX8 IFNG CDK1 AGTR1 EEF1E1 TP53 YPEL3 CXCL8 GHITM CGAS KIR2DL4 ROMO1 MUSK RIPK1 B2M MORC3 ADIPOQ CBR1 ARG2 GADD45A DCXR PRKCE AKR1C1 AKR1C3 F2 HLA-G DHRS4 ACE2 GRB2 IFNAR1 PID1 LIPT2 HPN CDKN1A PDGFB THBS1 GATA3 CCNB1 ZC3H12A CCL5 CHCHD2 TNIP1 TMBIM1 BCL3 NINJ1 MGAT1 ACSL1 SQRDL ZC3H12A NUCB1 ALDH4A1 RAB5…	5.81431e-07	#aec7e8	0.5	0	12	3.61775		102	8.45468	-0.999745	Cluster 0	Extrinsic Apoptotic Signaling Pathway Via Death Domain Receptors (GO:0008625)	CASP8AP2 DAXX SORT1 CRADD DELE1 TNFRSF10C TNFRSF10B TNFRSF10A NGF TNFRSF1A DAB2IP BCL2 BAX GABARAP DDX3X SPI1 DIABLO DDX47 TRADD TNF FASLG ZDHHC3 DEDD2 CASP8 BLOC1S2 CASP10 FADD BID MOAP1 DEDD HCK VASP SPI1 ADAM8 LILRB3 GPSM3 ARRB2 WAS NFAM1 C10ORF54 FMNL1 MYO1F EFHD2 TNFRSF1B NCF2 PPP1R18 RHOG THEMIS2 ZDHHC18 PILRA APOBR NCF1B ABTB1 LRRC25 OSCAR ARAP1 ADGRE5 SECTM1 SHKBP1 NADK HLA.A GMIP NCF1 FP…	1.17754e-05	#440154	0.5	0	12	2.96451		102	8.45468	-0.999745	Cluster 0	Extrinsic Apoptotic Signaling Pathway Via Death Domain Receptors (GO:0008625)	CASP8AP2 DAXX SORT1 CRADD DELE1 TNFRSF10C TNFRSF10B TNFRSF10A NGF TNFRSF1A DAB2IP BCL2 BAX GABARAP DDX3X SPI1 DIABLO DDX47 TRADD TNF FASLG ZDHHC3 DEDD2 CASP8 BLOC1S2 CASP10 FADD BID MOAP1 DEDD HCK VASP SPI1 ADAM8 LILRB3 GPSM3 ARRB2 WAS NFAM1 C10ORF54 FMNL1 MYO1F EFHD2 TNFRSF1B NCF2 PPP1R18 RHOG THEMIS2 ZDHHC18 PILRA APOBR NCF1B ABTB1 LRRC25 OSCAR ARAP1 ADGRE5 SECTM1 SHKBP1 NADK HLA.A GMIP NCF1 FP…	0.00785601	#440154	0.5	0	12	1.5524
4262	10.9106	-1.15169	Cluster 10	Negative Regulation Of Steroid Biosynthetic Process (GO:0010894)	BMP5 GFI1 FGF19 PROX1 SNAI2 DKKL1 SNAI1 NR0B1 NFKB1 WNT4 WNT4 NR0B1 BMP5 SNAI1 NFKB1 PROX1 SNAI2 DKKL1 FGF19 GFI1 SLC30A8 INS DUSP5 GCH1 SCGN ABCC8 SCG5 ZC3H12A IRAK2 RNF19B TRAF1 PCSK1 IL1B G6PC2 GNRH1 ERO1B SPSB1 FXYD2 ERO1A ELL2 SGPP2 TNF MSC PTPRN NFKB2 SLAMF7 PAPSS2 RAB22A IER3 ICAM1 PTK6 CPE IL10 IL27 SUSD6 ACOD1 SSR4 TMED6 SMIM6 RIN2 PTGS2 CD274 SOCS3 ADCYAP1 SOD2 ZNF114 FICD IL1RN SOCS1 P…	0.0872104	#aec7e8	0.5	0	5	1.02972		103	8.57786	-2.10391	Cluster 0	Positive Regulation Of Cell Killing (GO:0031343)	MAPK8 SYK IFNG PRF1 NOS2 FCER2 SYK FCER2 PTPN6 PRF1 CORO1A RAC2 LCP1 LAPTM5 IFNG CD37 CD53 CSK ARHGAP30 LSP1 TFEB PTK2B NOS2 MAP4K1 HVCN1 CYTH1 HCLS1 SASH3 CD19 CD79A CCDC88B MYO1G HLA.B NCKAP1L HLA.DRB1 HLA.A RUNX3 ARHGAP45 DOCK2 HLA.E AKNA WAS PIK3CD WIPF1 INPP5D CSF2 RASSF5 TAP1 WDFY4 RPS6KA1 SIPA1 MOB3A GPSM3 CARD11 RASAL3 FCMR HLA.DQB1 STAT6 APBB1IP PSD4 NCF1 HLA.DOA TNFRSF14 BLK LY75 FMNL1 …	0.00358075	#440154	0.5	0	12	1.72301		103	8.57786	-2.10391	Cluster 0	Positive Regulation Of Cell Killing (GO:0031343)	MAPK8 SYK IFNG PRF1 NOS2 FCER2 SYK FCER2 PTPN6 PRF1 CORO1A RAC2 LCP1 LAPTM5 IFNG CD37 CD53 CSK ARHGAP30 LSP1 TFEB PTK2B NOS2 MAP4K1 HVCN1 CYTH1 HCLS1 SASH3 CD19 CD79A CCDC88B MYO1G HLA.B NCKAP1L HLA.DRB1 HLA.A RUNX3 ARHGAP45 DOCK2 HLA.E AKNA WAS PIK3CD WIPF1 INPP5D CSF2 RASSF5 TAP1 WDFY4 RPS6KA1 SIPA1 MOB3A GPSM3 CARD11 RASAL3 FCMR HLA.DQB1 STAT6 APBB1IP PSD4 NCF1 HLA.DOA TNFRSF14 BLK LY75 FMNL1 …	0.162797	#440154	0.5	0	5	0.894177
4263	10.5623	-0.896769	Cluster 10	Negative Regulation Of Protein Secretion (GO:0050709)	RHBDF2 RHBDF1 CHGA KCNJ11 KCNB1 F2R CYP51A1 NR1H3 RSAD2 OPRM1 INHBB BMP8A SIRT4 IL1B SERGEF REST ADTRP ERP29 CD200 MIDN PRKN IRS1 HMGCR INS SFRP1 FOXO1 PSMD9 RAB11FIP1 DPH3 APOE IL12B IL12A DRD2 FAM3D CCN3 DRD3 RAB11FIP3 DRD4 RAB11FIP5 NECTIN2 SRC ARHGEF10L LAMP1 SPHK1 IER3 NR1H3 SLC2A6 LILRB4 SPSB1 SLC43A2 PFKFB3 MMP19 PLAUR RHBDF1 NINJ1 BCAR1 CTSZ SLC15A3 GRAMD1A MMP14 ACP2 IL1B DRAM1 TOM1 IL1R…	3.07365e-06	#aec7e8	0.5	0	12	3.25617		104	9.57566	-1.29363	Cluster 0	Regulation Of Dendritic Cell Apoptotic Process (GO:2000668)	LYN CXCL12 CCL21 RAPGEF2 LILRB1 CCR7 CCL19 LGALS9 GAS6 LGALS9 LILRB1 LYN LILRB2 TNIP1 TNFRSF1B HCK CCL19 TAP1 BCL3 TYMP TNFRSF14 PIK3R5 SLC15A3 TNFAIP2 RELB RNF19B NFKB2 IL10RA PILRA DHX58 MGAT1 TRAF1 MYO9B STAT6 PLEKHO1 THEMIS2 TCIRG1 CD40 LILRA3 CCR7 LAPTM5 MAN2B1 SLAMF7 EHD1 PRKCD HLA.A SECTM1 MX2 CCR5 ARAP1 NOD2 APOL3 LILRB4 PARP10 UNC93B1 FCGRT CD274 SBNO2 NINJ1 ELF4 PPP1R18 CD4 PLEKHO2 TLR8…	5.13091e-09	#440154	0.5	0	12	4.6449		104	9.57566	-1.29363	Cluster 0	Regulation Of Dendritic Cell Apoptotic Process (GO:2000668)	LYN CXCL12 CCL21 RAPGEF2 LILRB1 CCR7 CCL19 LGALS9 GAS6 LGALS9 LILRB1 LYN LILRB2 TNIP1 TNFRSF1B HCK CCL19 TAP1 BCL3 TYMP TNFRSF14 PIK3R5 SLC15A3 TNFAIP2 RELB RNF19B NFKB2 IL10RA PILRA DHX58 MGAT1 TRAF1 MYO9B STAT6 PLEKHO1 THEMIS2 TCIRG1 CD40 LILRA3 CCR7 LAPTM5 MAN2B1 SLAMF7 EHD1 PRKCD HLA.A SECTM1 MX2 CCR5 ARAP1 NOD2 APOL3 LILRB4 PARP10 UNC93B1 FCGRT CD274 SBNO2 NINJ1 ELF4 PPP1R18 CD4 PLEKHO2 TLR8…	0.0564699	#440154	0.5	0	5	1.12409
4264	10.818	-1.13542	Cluster 10	Inflammatory Response To Wounding (GO:0090594)	MAPK9 IL6 HMOX1 TNF TLR3 TNF IL6 ICAM1 MMP19 ZC3H12A PLAUR IL1B MSC AMPD3 CXCL3 GPR84 IER3 PFKFB3 TRAF1 CCR5 SERPINB2 IRAK2 IL10 HMOX1 NINJ1 SPHK1 SLAMF7 RNF19B TNIP1 IL27 RAB7B CCRL2 IL1RN LILRB4 SOCS3 CCL3L3 CD68 SRC ADORA2A CD274 EHD1 ACOD1 SOD2 SIGLEC1 SLC15A3 PTGS2 NIPAL4 SQRDL SLC2A6 LGMN NFKB1 CXCL2 CTSZ TICAM1 TNIP3 NFKB2 OASL CXCL8 C1QC LILRB5 DRAM1 FTL BCL3 TNFAIP2 LACTB CCL3 FCGRT KMO …	2.3551e-12	#aec7e8	0.5	0	12	6.31399		105	9.43382	-0.915069	Cluster 0	Regulation Of Dendritic Cell Antigen Processing And Presentation (GO:0002604)	FCGR2B SLC11A1 CCL21 NOD1 THBS1 NOD2 CCR7 CD68 LILRB2 HCK TNFRSF1B PILRA NOD2 SLC15A3 PIK3R5 OSCAR CD68 PLEKHO2 NCF2 LILRB3 THEMIS2 ITGAX TLR2 SIGLEC9 SPI1 TCIRG1 LAPTM5 C5AR1 CD4 ARAP1 CCR1 MYO9B TYMP MGAT1 MAN2B1 FCGR2B IL10RA CTSS LYN LGALS9 EMILIN2 CTSZ SLC11A1 BCL3 CYTH4 SLC43A2 NINJ1 ARRB2 GRN APOBR LILRB4 PRKCD IFI30 LILRB1 MPEG1 FGR TNIP1 FCGRT STX11 NPL FMNL1 CD14 LITAF AOAH LILRA6 VASP …	8.15529e-10	#440154	0.5	0	12	5.04428		105	9.43382	-0.915069	Cluster 0	Regulation Of Dendritic Cell Antigen Processing And Presentation (GO:0002604)	FCGR2B SLC11A1 CCL21 NOD1 THBS1 NOD2 CCR7 CD68 LILRB2 HCK TNFRSF1B PILRA NOD2 SLC15A3 PIK3R5 OSCAR CD68 PLEKHO2 NCF2 LILRB3 THEMIS2 ITGAX TLR2 SIGLEC9 SPI1 TCIRG1 LAPTM5 C5AR1 CD4 ARAP1 CCR1 MYO9B TYMP MGAT1 MAN2B1 FCGR2B IL10RA CTSS LYN LGALS9 EMILIN2 CTSZ SLC11A1 BCL3 CYTH4 SLC43A2 NINJ1 ARRB2 GRN APOBR LILRB4 PRKCD IFI30 LILRB1 MPEG1 FGR TNIP1 FCGRT STX11 NPL FMNL1 CD14 LITAF AOAH LILRA6 VASP …	0.542494	#440154	0.5	0	5	0.632803
4265	10.7934	-1.21167	Cluster 10	Regulation Of Complement-Dependent Cytotoxicity (GO:1903659)	IL11 CR1 IL4 TGFB2 IL10 CFH CR1L IL13 CD59 CD59 IL5 IL11 CFH CR1L TGFB2 IL4 IL13 IL10 SPSB1 CR1 ICAM1 DDX60L MTF1 PLAUR IL27 RNF19B PICALM ACSL1 NAMPT IL1RN CPQ IL31 SOD2 PTGS2 TNIP1 SLAMF7 CLCF1 NIPAL4 IER3 SOCS3 FFAR3 MICAL2 TLR4 EHD1 CD274 AMPD3 PDCD1LG2 LIF DHX58 SPHK1 ITGB1 PARP14 BCL2A1 PFKFB3 TRAF1 FAM129A TLR8 SQRDL OGFRL1 MMP19 SAMD9 FNDC3B OASL APOL6 ACOD1 INHBA IGF2R FCAMR BCL3 ANXA5 L…	9.90442e-07	#aec7e8	0.5	0	12	3.50209		106	9.82653	-2.17054	Cluster 0	Regulation Of Defense Response To Virus By Host (GO:0050691)	APOBEC3F HSP90AA1 APOBEC3G STAT1 DTX3L TOMM70 EIF2AK4 MUL1 LILRB1 IFNLR1 ZDHHC11 STING1 TARBP2 PARP9 USP17L2 IL4 MAVS IL23A RIGI ZDHHC1 DHX9 IL23R TRAF3IP2 TNFAIP3 PTPN22 CGAS PQBP1 NT5C2 ZC3H12A RNF216 TRIM6 SIN3A IL12B TRIM44 IL12RB1 TRIM22 MICB OAS2 TAP1 TRIM22 MX2 DTX3L MX1 NFKB1 NFKB2 TRAF1 HELZ2 STAT1 OAS1 OAS3 RASSF5 PARP14 NLRC5 LILRB1 IRF1 GBP2 IL10RA TRIM25 ZC3H12A DHX58 TNIP1 CYTH1 ZNF…	1.58164e-07	#440154	0.5	0	12	3.90045		106	9.82653	-2.17054	Cluster 0	Regulation Of Defense Response To Virus By Host (GO:0050691)	APOBEC3F HSP90AA1 APOBEC3G STAT1 DTX3L TOMM70 EIF2AK4 MUL1 LILRB1 IFNLR1 ZDHHC11 STING1 TARBP2 PARP9 USP17L2 IL4 MAVS IL23A RIGI ZDHHC1 DHX9 IL23R TRAF3IP2 TNFAIP3 PTPN22 CGAS PQBP1 NT5C2 ZC3H12A RNF216 TRIM6 SIN3A IL12B TRIM44 IL12RB1 TRIM22 MICB OAS2 TAP1 TRIM22 MX2 DTX3L MX1 NFKB1 NFKB2 TRAF1 HELZ2 STAT1 OAS1 OAS3 RASSF5 PARP14 NLRC5 LILRB1 IRF1 GBP2 IL10RA TRIM25 ZC3H12A DHX58 TNIP1 CYTH1 ZNF…	8.2329e-07	#440154	0.5	0	12	3.54222
4266	10.8095	-1.1935	Cluster 10	Negative Regulation Of Systemic Arterial Blood Pressure (GO:0003085)	BMPR2 NPPA NPPB GPR37L1 ADRB2 PRCP ADRB3 SOD2 NPPA NPPB SOD2 BMPR2 ADRB2 PRCP BMP10 GPR37L1 ADRB3 ANKRD1 MYL7 ARHGAP31 IL10 IL27 XIRP1 POPDC2 IL1RN SLAMF7 SLC8A1 ACOD1 PDE4DIP DOCK4 SOCS3 ICAM1 NIPAL4 RNF19B PFKFB3 MYLK3 CFLAR MMP19 P2RX7 CD274 MYL4 TNFAIP2 PLN AMPD3 PDLIM5 DENND5A KYNU SCD5 PGM5 TNIP3 MRAS CORIN KMO LILRB4 FNIP2 TBX5 TNF RGL1 SAMD4A SIRPA OGFRL1 PLAUR FFAR3 HIVEP2 CCRL2 SYNPO2L …	0.0375995	#aec7e8	0.5	0	12	1.21241		107	9.1104	-1.30364	Cluster 0	Regulation Of Defense Response (GO:0031347)	AREL1 IL1R1 WNT5A CMA1 APLP2 SHPK FOXP1 LACC1 TNFSF4 AGTR1 GGT3P LETMD1 RELA TNC PARK7 NOD2 LRP8 HERC5 NLRP9 NLRP7 NLRP8 NLRP5 ALOX5 NLRP6 NLRP4 NLRP1 NLRP2 N4BP1 TIRAP TRAF3 NR1D2 SELE MYD88 FBXL2 CARD16 BIRC2 PTGES BIRC3 AKNA GATA6 AGER APOE SEMA7A GGT1 CCR2 ANXA1 XCL1 IRF1 BST1 CYLD FCGR2B BCL6 MGLL NFE2L2 DAGLB CELF1 ALOX15 SPATA2 PTPN22 CGAS ADAMTS12 TREM2 ZMPSTE24 SBNO2 CASP8 TKFC CASP4 CAS…	0.000697415	#440154	0.5	0	12	2.07825		107	9.1104	-1.30364	Cluster 0	Regulation Of Defense Response (GO:0031347)	AREL1 IL1R1 WNT5A CMA1 APLP2 SHPK FOXP1 LACC1 TNFSF4 AGTR1 GGT3P LETMD1 RELA TNC PARK7 NOD2 LRP8 HERC5 NLRP9 NLRP7 NLRP8 NLRP5 ALOX5 NLRP6 NLRP4 NLRP1 NLRP2 N4BP1 TIRAP TRAF3 NR1D2 SELE MYD88 FBXL2 CARD16 BIRC2 PTGES BIRC3 AKNA GATA6 AGER APOE SEMA7A GGT1 CCR2 ANXA1 XCL1 IRF1 BST1 CYLD FCGR2B BCL6 MGLL NFE2L2 DAGLB CELF1 ALOX15 SPATA2 PTPN22 CGAS ADAMTS12 TREM2 ZMPSTE24 SBNO2 CASP8 TKFC CASP4 CAS…	0.314894	#440154	0.5	0	5	0.750918
4267	10.4032	-1.54067	Cluster 10	Positive Regulation Of T Cell Apoptotic Process (GO:0070234)	CD274 PRELID1 CCL5 LGALS16 ZC3H8 PDCD1 LGALS9 IDO1 TP53 CD274 SLAMF7 CD40 TRAF1 CCR5 IDO1 LGALS9 TNIP1 ADORA2A DHX58 TAP1 SOCS1 GBP1 RNF19B CD80 NFKB2 LILRB4 NINJ1 RELB APOL3 PDCD1 LILRA3 SQRDL LILRB2 ACOD1 MSC OASL NFKBIE IL15RA TNFRSF1B SLAMF1 IL10RA IL27 ICAM1 IL1RN BCL3 EHD1 GBP2 ISG20 LILRB1 IRF5 GPR132 SLC15A3 IFI35 NEURL3 GRAMD1A LAP3 SIGLEC1 CCL5 TNFAIP2 CXCL9 TYMP ZC3H12A MYO1G TICAM1 IR…	2.00103e-08	#aec7e8	0.5	0	12	4.34937		108	8.91658	-1.45111	Cluster 0	Regulation Of Cytokine-Mediated Signaling Pathway (GO:0001959)	PTPN1 PTPN2 CD74 SYK TSLP SPHK1 PTPN11 VRK2 HIPK1 MIB2 PTPRC IL7 CYLD AXL CDC37 MAPKAPK2 OTULIN ULK1 PTPN6 GAS6 CD24 SIGIRR PALM3 SPPL2B SPATA2 TNFAIP3 SPPL2A AGPAT2 PYCARD IKBKB CASP8 SHARPIN IRAK2 TBK1 IRAK3 IRAK1 IGF2BP1 IL36RN TRIM44 IKBKE SBNO2 MYO9B MAPKAPK2 ELF4 OGFR ARAP1 TNIP1 PIK3R5 EHBP1L1 MGAT1 TCIRG1 CYTH1 STAT6 BCL3 ARHGAP4 MAN2B1 GRK2 VASP TNFRSF1B NFKB2 EHD1 TGFB1 LAPTM5 FBRS FMNL…	0.00262545	#440154	0.5	0	12	1.7904		108	8.91658	-1.45111	Cluster 0	Regulation Of Cytokine-Mediated Signaling Pathway (GO:0001959)	PTPN1 PTPN2 CD74 SYK TSLP SPHK1 PTPN11 VRK2 HIPK1 MIB2 PTPRC IL7 CYLD AXL CDC37 MAPKAPK2 OTULIN ULK1 PTPN6 GAS6 CD24 SIGIRR PALM3 SPPL2B SPATA2 TNFAIP3 SPPL2A AGPAT2 PYCARD IKBKB CASP8 SHARPIN IRAK2 TBK1 IRAK3 IRAK1 IGF2BP1 IL36RN TRIM44 IKBKE SBNO2 MYO9B MAPKAPK2 ELF4 OGFR ARAP1 TNIP1 PIK3R5 EHBP1L1 MGAT1 TCIRG1 CYTH1 STAT6 BCL3 ARHGAP4 MAN2B1 GRK2 VASP TNFRSF1B NFKB2 EHD1 TGFB1 LAPTM5 FBRS FMNL…	0.442512	#440154	0.5	0	5	0.677037
4268	10.766	-1.23366	Cluster 10	Regulation Of Prostaglandin Biosynthetic Process (GO:0031392)	IL1B CD74 PLA2G3 PIBF1 SIRT1 PTGS2 IL1B PTGS2 CXCL8 TNF CXCL3 ZC3H12A IL1A PLAUR SERPINB2 IRAK2 GPR84 TRAF1 RNF19B SOCS3 NFKB1 ICAM1 SIRT1 PFKFB3 AMPD3 IER3 AC013444.1 CCRL2 ADORA2A OLR1 SLAMF7 SLC2A6 IL1RN TNIP1 IL10 SOD2 NFKB2 EHD1 MAP3K8 LILRB2 NLRP3 IL6 MMP19 PLA2G3 HCAR2 ACOD1 GRAMD1A CD74 IL27 CD274 MSC GPR132 NINJ1 PIBF1 PELI1 PIK3R5 OASL CCR5 TNFAIP2 CD40 HLA.DRB1 LILRB4 BCL3 STX11 KMO CC…	8.60572e-11	#aec7e8	0.5	0	12	5.53261		109	9.01354	-0.969969	Cluster 0	Regulation Of Cytokine Production Involved In Inflammatory Response (GO:1900015)	IL17RA CHID1 PPARA CARD9 STAT3 APLP2 PSG4 F2 LILRB4 TICAM2 TICAM1 MAPK14 IL17A MYD88 IL6 CD6 PER1 LEP PDCD4 TLR6 IL17D CUEDC2 TLR4 MEFV NOD2 TNF HIF1A MACIR NLRC3 TREM2 PLD4 ADCY7 PLD3 PYCARD MAPK9 EXTL3 NLRP7 ZC3H12A CLEC7A ALOX5 SIRPA NOS2 APPL1 ABCD2 APOD GBP5 HCK NCF2 LILRB2 TLR2 ITGAX PIK3R5 TNFRSF1B PILRA THEMIS2 LILRB3 ARAP1 CTSS TLR8 SIGLEC9 IL17RA SPI1 OSCAR FMNL1 ARRB2 LYN NOD2 CYTH4 AO…	3.00964e-09	#440154	0.5	0	12	4.76074		109	9.01354	-0.969969	Cluster 0	Regulation Of Cytokine Production Involved In Inflammatory Response (GO:1900015)	IL17RA CHID1 PPARA CARD9 STAT3 APLP2 PSG4 F2 LILRB4 TICAM2 TICAM1 MAPK14 IL17A MYD88 IL6 CD6 PER1 LEP PDCD4 TLR6 IL17D CUEDC2 TLR4 MEFV NOD2 TNF HIF1A MACIR NLRC3 TREM2 PLD4 ADCY7 PLD3 PYCARD MAPK9 EXTL3 NLRP7 ZC3H12A CLEC7A ALOX5 SIRPA NOS2 APPL1 ABCD2 APOD GBP5 HCK NCF2 LILRB2 TLR2 ITGAX PIK3R5 TNFRSF1B PILRA THEMIS2 LILRB3 ARAP1 CTSS TLR8 SIGLEC9 IL17RA SPI1 OSCAR FMNL1 ARRB2 LYN NOD2 CYTH4 AO…	0.0154774	#440154	0.5	0	12	1.40515
4269	10.8127	-1.06969	Cluster 10	Positive Regulation Of Signaling Receptor Activity (GO:2000273)	CCR2 NCOA3 EDN1 FBXW7 EGF IL10 BUD31 ADRA2C ADRA2B EREG ADRA2A TAF1 BTC EPGN NELL1 GREM1 IFNG NCF1 HBEGF SHANK3 ITGB1 HDAC6 NOL3 NLGN3 HDAC1 HDAC2 HFE PARK7 TGFA ADRB2 AREG HIF1A RELN CCL2 EPHB2 JAK2 PLAUR IER3 ICAM1 CD274 PFKFB3 SPHK1 TNIP1 HBEGF SQRDL RNF19B ZC3H12A AMPD3 EHD1 IRAK2 IL1RN MMP19 GPR84 TRIP10 IL10 LACTB SPSB1 FOSL2 CLCF1 NINJ1 PTGS2 SRC EREG DRAM1 TGFA CXCL3 TICAM1 LAMP1 NIPAL4 P…	4.1681e-07	#aec7e8	0.5	0	12	3.69003		110	9.56364	-1.15341	Cluster 0	Regulation Of Cytokine Production Involved In Immune Response (GO:0002718)	CCR2 IL10 SPHK2 WNT5A TRIL LILRB1 LAPTM5 APOA2 NOD2 TNF SCIMP TNFRSF1B INAVA SLC7A5 IRF5 TRIM6 LACC1 F2RL1 CLC BTK FFAR3 FFAR2 TNFRSF14 TRPM4 TNFRSF1B LILRB2 HCK PILRA PIK3R5 OSCAR LILRB1 LAPTM5 SLC15A3 IRF5 LILRB3 NOD2 TNIP1 NINJ1 NCF2 TYMP SPI1 SIGLEC9 BCL3 TLR2 LYN EHD1 ITGAX THEMIS2 TNFAIP2 NFKB2 RNF19B MAN2B1 SLC43A2 C5AR1 PRKCD APOBR ADGRE2 TNFRSF14 LGALS9 TCIRG1 LILRA6 FGR PLEKHO2 IL10RA L…	2.96939e-07	#440154	0.5	0	12	3.76367		110	9.56364	-1.15341	Cluster 0	Regulation Of Cytokine Production Involved In Immune Response (GO:0002718)	CCR2 IL10 SPHK2 WNT5A TRIL LILRB1 LAPTM5 APOA2 NOD2 TNF SCIMP TNFRSF1B INAVA SLC7A5 IRF5 TRIM6 LACC1 F2RL1 CLC BTK FFAR3 FFAR2 TNFRSF14 TRPM4 TNFRSF1B LILRB2 HCK PILRA PIK3R5 OSCAR LILRB1 LAPTM5 SLC15A3 IRF5 LILRB3 NOD2 TNIP1 NINJ1 NCF2 TYMP SPI1 SIGLEC9 BCL3 TLR2 LYN EHD1 ITGAX THEMIS2 TNFAIP2 NFKB2 RNF19B MAN2B1 SLC43A2 C5AR1 PRKCD APOBR ADGRE2 TNFRSF14 LGALS9 TCIRG1 LILRA6 FGR PLEKHO2 IL10RA L…	0.257333	#440154	0.5	0	5	0.794752
4270	10.7421	-1.38781	Cluster 10	Positive Regulation Of T Cell Cytokine Production (GO:0002726)	IL1R1 FZD5 DENND1B XCL1 CD81 RSAD2 HLA-A TRAF2 IL18 MALT1 IL1B IL4 PRKCZ IL6 TNFSF4 TRAF6 TBX21 NLRP3 MAP3K7 CD55 IL18R1 IL1B ZC3H12A NFKB1 RNF19B IL6 TNF PTGS2 TRAF1 IRAK2 PLAUR GPR84 NLRP3 ICAM1 TNIP1 SOCS3 CCRL2 PFKFB3 NFKB2 CXCL8 OASL EHD1 CXCL3 NINJ1 LILRB2 DHX58 RSAD2 SLAMF7 CD274 IL1A BCL3 AMPD3 STX11 ADORA2A CCR5 TNFAIP8 CMPK2 MAP3K8 IL1R1 IER3 SERPINB2 SOD2 IL1RN TICAM1 PIK3R5 SQRDL HELZ…	9.70561e-08	#aec7e8	0.5	0	12	4.00649		111	9.03484	-1.77162	Cluster 0	Regulation Of Cytokine Production (GO:0001817)	GBP7 BTNL9 MOG ZBTB17 CRTAM CADM1 BTN1A1 BTNL2 ZBTB12 CIDEA BTNL3 AGT EREG FOXP3 BATF HIC2 BTNL8 MAPK14 FOXP1 MAPKAPK2 LEP CLEC4A ASB1 ZBTB26 VTCN1 ZBTB25 TNF ZBTB20 IFI16 ALOX5 S100A13 CCN4 N4BP1 AFAP1L2 GLMN SLC11A1 BTN2A2 BTN2A1 TRAF3 ISG15 HLA-B ADRA2A CCDC88B RGCC CLEC6A SNAI2 NOX5 RIGI HLA-DRB1 CD276 ZNF134 EOLA1 ZNF131 HHLA2 PPP1R11 TXK TRIL C5AR2 ZBTB2 ZBTB1 GATA3 ZBTB6 C1QTNF3 BTN2A3P TB…	9.28135e-05	#440154	0.5	0	12	2.51619		111	9.03484	-1.77162	Cluster 0	Regulation Of Cytokine Production (GO:0001817)	GBP7 BTNL9 MOG ZBTB17 CRTAM CADM1 BTN1A1 BTNL2 ZBTB12 CIDEA BTNL3 AGT EREG FOXP3 BATF HIC2 BTNL8 MAPK14 FOXP1 MAPKAPK2 LEP CLEC4A ASB1 ZBTB26 VTCN1 ZBTB25 TNF ZBTB20 IFI16 ALOX5 S100A13 CCN4 N4BP1 AFAP1L2 GLMN SLC11A1 BTN2A2 BTN2A1 TRAF3 ISG15 HLA-B ADRA2A CCDC88B RGCC CLEC6A SNAI2 NOX5 RIGI HLA-DRB1 CD276 ZNF134 EOLA1 ZNF131 HHLA2 PPP1R11 TXK TRIL C5AR2 ZBTB2 ZBTB1 GATA3 ZBTB6 C1QTNF3 BTN2A3P TB…	0.0008295	#440154	0.5	0	12	2.04059
4271	10.8671	-1.19001	Cluster 10	Regulation Of Cell Killing (GO:0031341)	IL11 TGFB2 IL10 MAPK8 CFH CR1L CD59 ICAM1 ICAM1 IL10 IL27 MMP19 IL1RN NIPAL4 SPSB1 PLAUR SLAMF7 SPHK1 IER3 SOCS3 EHD1 PFKFB3 CD274 ACOD1 AMPD3 MSC CD59 TRIP10 TNIP1 CLCF1 TRAF1 CD40 RNF19B TNF ZC3H12A SOD2 FFAR3 IRAK2 PTGS2 CCRL2 NEURL3 GPR84 OASL DRAM1 IL15RA IL6 TNFSF9 SQRDL FCAMR LILRB4 CSF3 SIGLEC1 IL11 ABTB2 CCL3L3 TNIP3 NINJ1 DHX58 SLC2A6 RASL11A RAB7B CFH BCL3 SLAMF1 LACTB PTX3 PTPN1 TGFB2…	2.35942e-07	#aec7e8	0.5	0	12	3.8136		112	9.39643	-0.606491	Cluster 0	Regulation Of Cysteine-Type Endopeptidase Activity Involved In Apoptotic Process (GO:0043281)	GPX1 EPHA7 BAD CARD9 DELE1 CARD8 DHCR24 FOXL2 SIRT1 VEGFA PAX2 PDCD5 CYCS DPEP1 BLID GAS6 NAIP RAF1 DDX3X PDCD6 NOD1 HMGB1 TNF IFI6 CASC2 AQP1 UACA PYCARD CLEC7A DNAJB6 MYC LAMP3 GPER1 AKT1 NLRP3 MAGEA3 NLRP2 CASP1 MAP3K5 SNCA CTSD FNIP1 FIS1 USP47 MAP2K5 IGBP1 CDKN2D BCAP31 F2R SYK DAPK1 CSNK2A1 SIAH2 HGF KLF4 NLRP12 REST XIAP AVP CARD16 LAMTOR5 NODAL CD44 FABP1 SRC ARL6IP1 NDUFA13 BCL10 HTRA2 T…	1.47422e-07	#440154	0.5	0	12	3.91572		112	9.39643	-0.606491	Cluster 0	Regulation Of Cysteine-Type Endopeptidase Activity Involved In Apoptotic Process (GO:0043281)	GPX1 EPHA7 BAD CARD9 DELE1 CARD8 DHCR24 FOXL2 SIRT1 VEGFA PAX2 PDCD5 CYCS DPEP1 BLID GAS6 NAIP RAF1 DDX3X PDCD6 NOD1 HMGB1 TNF IFI6 CASC2 AQP1 UACA PYCARD CLEC7A DNAJB6 MYC LAMP3 GPER1 AKT1 NLRP3 MAGEA3 NLRP2 CASP1 MAP3K5 SNCA CTSD FNIP1 FIS1 USP47 MAP2K5 IGBP1 CDKN2D BCAP31 F2R SYK DAPK1 CSNK2A1 SIAH2 HGF KLF4 NLRP12 REST XIAP AVP CARD16 LAMTOR5 NODAL CD44 FABP1 SRC ARL6IP1 NDUFA13 BCL10 HTRA2 T…	0.13669	#440154	0.5	0	5	0.932132
4272	10.8541	-1.20186	Cluster 10	Negative Regulation Of Hydrogen Peroxide-Induced Cell Death (GO:1903206)	IL10 HGF LRRK2 GPR37L1 PYCR1 TXN PARK7 MET RACK1 NFE2L2 TXN IL10 NFE2L2 ICAM1 IL27 SLAMF7 CD274 IL1RN PLAUR PARK7 NIPAL4 SPHK1 MET MMP19 ACOD1 MSC TRIP10 HGF IER3 CD40 C17ORF96 TNIP1 RNF19B TNF TRAF1 CLCF1 PYCR1 TNFSF9 PTPN1 IL15RA SOCS3 EHD1 TICAM1 NINJ1 DHX58 FTL FFAR3 OASL NEURL3 TNFAIP2 SOD2 GPR84 NME2 TNIP3 RACK1 CCRL2 SQRDL AMPD3 TRIM25 PTGS2 ZC3H12A SLAMF1 NPC2 CCL3L3 SLC2A6 ANXA5 RASL11A …	3.60019e-08	#aec7e8	0.5	0	12	4.22184		113	8.14239	-1.15391	Cluster 0	Regulation Of Cysteine-Type Endopeptidase Activity (GO:2000116)	TTBK1 EPHA7 MEFV PCID2 DELE1 MT3 CSN2 GRIN1 PSMB9 CST5 CST4 CST3 PYCARD GRIN2B CST2 SOX2 NLRP12 CST1 IFI16 USP50 FYN LTF BIRC2 BIRC3 CST2 CST1 CST4 CST3 S100A4 KIAA0513 RASSF2 PSMB9 MEFV AGAP2 SPANXB1 EMP3 VAMP2 PRKCDBP IFI16 NLRP12 CD53 GAS7 YPEL3 WBP2 HLA.E GLT1D1 IDS HLA.A NRGN ARRB2 HCLS1 MYO1F ADAM8 EVI2B CAMK2A CFP KCNJ9 PSD GPSM3 HCK C10ORF54 PRKCB THEMIS2 ABTB1 NFAM1 FAIM2 GRIN1 SYN1 B2M …	0.0117095	#440154	0.5	0	12	1.46573		113	8.14239	-1.15391	Cluster 0	Regulation Of Cysteine-Type Endopeptidase Activity (GO:2000116)	TTBK1 EPHA7 MEFV PCID2 DELE1 MT3 CSN2 GRIN1 PSMB9 CST5 CST4 CST3 PYCARD GRIN2B CST2 SOX2 NLRP12 CST1 IFI16 USP50 FYN LTF BIRC2 BIRC3 CST2 CST1 CST4 CST3 S100A4 KIAA0513 RASSF2 PSMB9 MEFV AGAP2 SPANXB1 EMP3 VAMP2 PRKCDBP IFI16 NLRP12 CD53 GAS7 YPEL3 WBP2 HLA.E GLT1D1 IDS HLA.A NRGN ARRB2 HCLS1 MYO1F ADAM8 EVI2B CAMK2A CFP KCNJ9 PSD GPSM3 HCK C10ORF54 PRKCB THEMIS2 ABTB1 NFAM1 FAIM2 GRIN1 SYN1 B2M …	0.0383279	#440154	0.5	0	12	1.20824
4273	9.71034	-0.506986	Cluster 10	Positive Regulation Of Apoptotic Signaling Pathway (GO:2001235)	GSDME TNFRSF12A CRADD CAV1 TGFBR1 PML CYLD NUPR1 FAS AGTR2 BAX TLR6 S100A9 TLR4 TP53 S100A8 PLEKHF1 TNF CTSV CTSS STYXL1 BBC3 PYCARD PAK2 BCLAF1 CTSL CTSK GPER1 FADD CTSH RPS3 RIPK1 BOK FIS1 WWOX SIAH1 BCAP31 G0S2 SEPTIN4 TRAF2 SLC9A3R1 DAB2IP TPD52L1 LCK LTBR TRAF7 LTB DDIT3 TRIM39 BECN1 BCL10 DEDD2 ING5 HYAL2 NKX3-1 TNFSF12 IFNB1 PMAIP1 TNFSF10 RACK1 BID DNM1L MGAT1 VASP GRN OGFR SBNO2 HCK BCL3…	1.40053e-07	#aec7e8	0.5	0	12	3.92685		114	7.94811	-0.369061	Cluster 0	Regulation Of Complement Activation, Classical Pathway (GO:0030450)	CR1 CR2 CR1L SUSD4 C4BPB SVEP1 CD46 TREM2 CD46 CR1 LRRK2 SORL1 C4BPB STEAP4 CR1L CR2 NPL TLR8 DDX60L CFLAR TLR6 RNF149 PLXNC1 IGF2R TLR1 CTSS SVEP1 APOL6 NCF2 DOCK8 SSH2 TLR4 CPQ SUSD4 SMCHD1 FAM129A PTPRC PTPRJ VNN2 FGL2 NLRC4 LYN ARAP1 TREM2 MXD1 CYBB USP15 NAMPT IL17RA TMEM154 ACSL1 ITGAM GCA MNDA TRANK1 SIGLEC9 TEP1 PICALM ADGRE2 FPR2 LYST ALPK1 KDM7A ITGAX ASAH1 MBNL3 PARP14 NCKAP1L LCP1 ARH…	7.12323e-09	#440154	0.5	0	12	4.57366		114	7.94811	-0.369061	Cluster 0	Regulation Of Complement Activation, Classical Pathway (GO:0030450)	CR1 CR2 CR1L SUSD4 C4BPB SVEP1 CD46 TREM2 CD46 CR1 LRRK2 SORL1 C4BPB STEAP4 CR1L CR2 NPL TLR8 DDX60L CFLAR TLR6 RNF149 PLXNC1 IGF2R TLR1 CTSS SVEP1 APOL6 NCF2 DOCK8 SSH2 TLR4 CPQ SUSD4 SMCHD1 FAM129A PTPRC PTPRJ VNN2 FGL2 NLRC4 LYN ARAP1 TREM2 MXD1 CYBB USP15 NAMPT IL17RA TMEM154 ACSL1 ITGAM GCA MNDA TRANK1 SIGLEC9 TEP1 PICALM ADGRE2 FPR2 LYST ALPK1 KDM7A ITGAX ASAH1 MBNL3 PARP14 NCKAP1L LCP1 ARH…	0.145921	#440154	0.5	0	5	0.917941
4274	10.1593	-1.38119	Cluster 10	Regulation Of Activated T Cell Proliferation (GO:0046006)	IGFBP2 BTN2A2 RIPK3 PRNP CRTAM RC3H1 IGF1 PDCD1LG2 IGF2 IL18 SCRIB LILRB4 FOXP3 IL2 TMIGD2 IL23A PRKAR1A CLC TNFSF9 CD24 IDO1 CD274 HHLA2 IL23R HMGB1 PPP3CA PYCARD FADD IL12B RPS3 LGALS9 IL12RB1 ICOSLG CD274 LILRB4 SLAMF7 TRAF1 CD40 NINJ1 TNIP1 RNF19B LGALS9 CCR5 LILRB2 SLC15A3 DHX58 SQRDL NFKB2 BCL3 ICAM1 PILRA NFKB1 TYMP EHD1 MSC TNFAIP2 IL1RN SIGLEC1 TNFRSF1B CD80 ADORA2A ZC3H12A IL10RA TAP1 R…	3.9298e-08	#aec7e8	0.5	0	12	4.20282		115	8.08621	-2.15478	Cluster 0	Positive Regulation Of Cell-Cell Adhesion Mediated By Integrin (GO:0033634)	CXCL13 PODXL PIEZO1 CD3E SKAP1 CD3E SKAP1 CXCL13 PIEZO1 ARHGEF1 TMC6 ZAP70 SUN2 SEPT9 RASAL3 ETS1 TRBC1 TRBC2 ARHGAP45 CD247 CORO1A CARD11 AKNA NLRC5 DENND1C CD6 TMC8 IKZF1 TBC1D10C GRK2 TRAC SELPLG BCL9L TRAF3IP3 CSK SEPT1 RAC2 PPP6R1 EML3 PODXL RNF44 WIPF1 DCAF15 PACS1 GRK6 TCF7 PCED1B HLA.A CARMIL2 CD5 IL2RG GLTSCR2 DEF6 DNM2 IL32 DENND2D IL16 HDAC7 CYTH1 PRKCH NBEAL2 GIMAP5 ARHGAP4 CD8A SF1 P…	0.374485	#440154	0.5	0	5	0.713283		115	8.08621	-2.15478	Cluster 0	Positive Regulation Of Cell-Cell Adhesion Mediated By Integrin (GO:0033634)	CXCL13 PODXL PIEZO1 CD3E SKAP1 CD3E SKAP1 CXCL13 PIEZO1 ARHGEF1 TMC6 ZAP70 SUN2 SEPT9 RASAL3 ETS1 TRBC1 TRBC2 ARHGAP45 CD247 CORO1A CARD11 AKNA NLRC5 DENND1C CD6 TMC8 IKZF1 TBC1D10C GRK2 TRAC SELPLG BCL9L TRAF3IP3 CSK SEPT1 RAC2 PPP6R1 EML3 PODXL RNF44 WIPF1 DCAF15 PACS1 GRK6 TCF7 PCED1B HLA.A CARMIL2 CD5 IL2RG GLTSCR2 DEF6 DNM2 IL32 DENND2D IL16 HDAC7 CYTH1 PRKCH NBEAL2 GIMAP5 ARHGAP4 CD8A SF1 P…	0.0564699	#440154	0.5	0	5	1.12409
4275	10.9958	-0.378124	Cluster 10	Negative Regulation Of Mitotic Cell Cycle Phase Transition (GO:1901991)	USP47 MYO16 RFPL1 PRMT2 USP44 INHBA KLF4 WEE1 DLG1 RBL1 SLFN11 RGCC GFI1B RBL2 APC TFDP3 CDK2AP2 ZNF655 CRLF3 KANK2 RB1 AVEN PINX1 CDKN1A FHL1 ZFP36L1 DCUN1D3 FAM107A PTEN JADE1 CDC73 PKD2 ZFP36L2 GPR132 GPNMB FBXO5 CCL2 BRD7 E2F7 DACT1 CDC73 WEE1 PKD2 BACH1 RB1 RGCC ARHGAP31 NR3C1 ZNF655 USP12 DRAM1 EMILIN2 SLFN11 LHFPL2 INHBA ATP13A3 DSE AKAP2 RBL1 AMPD3 CDKN1A MMP19 CSGALNACT2 TIPARP GPNMB PLA…	1.68414e-06	#aec7e8	0.5	0	12	3.38681		116	9.45913	-1.04936	Cluster 0	Regulation Of Chemokine Production (GO:0032642)	EGR1 IL33 CD74 CHIA TSLP WNT5A EIF2AK2 IL18 LILRB4 ALOX15B TLR2 FOXP1 IL7 IL6 ADAM17 LCP1 TNFSF4 IFNG F2RL1 SNAI2 TLR9 TLR7 TLR4 SIGIRR TLR3 CSF1R APP AIRE TNF HIF1A AGER AIF1 TREM2 PYCARD C5 HMOX1 FFAR3 FFAR2 LGALS9 IL6R ELANE PILRA LILRB2 HCK TLR2 TNFRSF1B SLC15A3 OSCAR PIK3R5 SIGLEC9 NCF2 LGALS9 LAPTM5 ITGAX SPI1 NINJ1 PLEKHO2 C5AR1 CD68 LILRB4 LILRB3 EMILIN2 MAN2B1 RNF19B LYN FCGRT ADGRE2 THE…	3.67441e-10	#440154	0.5	0	12	5.21741		116	9.45913	-1.04936	Cluster 0	Regulation Of Chemokine Production (GO:0032642)	EGR1 IL33 CD74 CHIA TSLP WNT5A EIF2AK2 IL18 LILRB4 ALOX15B TLR2 FOXP1 IL7 IL6 ADAM17 LCP1 TNFSF4 IFNG F2RL1 SNAI2 TLR9 TLR7 TLR4 SIGIRR TLR3 CSF1R APP AIRE TNF HIF1A AGER AIF1 TREM2 PYCARD C5 HMOX1 FFAR3 FFAR2 LGALS9 IL6R ELANE PILRA LILRB2 HCK TLR2 TNFRSF1B SLC15A3 OSCAR PIK3R5 SIGLEC9 NCF2 LGALS9 LAPTM5 ITGAX SPI1 NINJ1 PLEKHO2 C5AR1 CD68 LILRB4 LILRB3 EMILIN2 MAN2B1 RNF19B LYN FCGRT ADGRE2 THE…	0.171587	#440154	0.5	0	5	0.882757
4276	10.6642	-0.811669	Cluster 10	Negative Regulation Of Hormone Secretion (GO:0046888)	IL11 IL1B RAB11FIP1 GJA1 NPVF LIF OSM RAB11FIP3 RAB11FIP5 LIF IL11 IER3 PTGS2 OSM RAB11FIP5 CXCL8 IL1B ZC3H12A FOSL2 MMP14 MAPKAPK2 SBNO2 FAM129B RAB11FIP3 CHPF2 TFE3 MAFK MYH9 PFKFB3 PLAUR CEBPB LRP10 CXCL3 HCAR2 SLC12A4 BCL3 IRAK2 ACTN1 NDST1 GJA1 WDR1 PPARD PLEKHM2 CSF3 ATP13A3 ATXN7L3 SOCS3 ZDHHC5 CSNK1D CHMP4B SLC16A3 LAMP1 RAB11FIP1 METRNL FLNA SDF4 SNX9 MAFG TNIP1 MICAL2 PNPLA6 FURIN ARHGD…	0.0209286	#aec7e8	0.5	0	12	1.33963		117	9.55786	-1.85899	Cluster 0	Regulation Of Chemokine (C-X-C Motif) Ligand 2 Production (GO:2000341)	FOXP1 MAP2K5 LCP1 OAS3 F2RL1 TIRAP HMGB1 TNF OAS1 KLF4 TLR4 MBL2 OAS1 OAS2 MX2 OAS3 STX11 LYN LCP1 NCF2 NOD2 TLR4 HELZ2 MX1 IFIT3 TLR8 LILRB2 CTSS TRIM25 TLR2 HCK IFIT2 CMPK2 TAP1 THEMIS2 IRF1 TNFRSF1B LILRB3 AQP9 DHX58 APOBEC3A DDX60L AOAH ACSL1 MPEG1 PILRA PRKCD MYD88 RNF19B TRIM22 PIK3AP1 PIK3R5 IL10RA SAMD9 PARP14 IRF7 ITGAX ELF4 HCLS1 CCR1 RSAD2 ADGRE2 CSF2RB LILRA6 LAPTM5 GBP2 AP5B1 WIPF1 L…	8.15529e-10	#440154	0.5	0	12	5.04428		117	9.55786	-1.85899	Cluster 0	Regulation Of Chemokine (C-X-C Motif) Ligand 2 Production (GO:2000341)	FOXP1 MAP2K5 LCP1 OAS3 F2RL1 TIRAP HMGB1 TNF OAS1 KLF4 TLR4 MBL2 OAS1 OAS2 MX2 OAS3 STX11 LYN LCP1 NCF2 NOD2 TLR4 HELZ2 MX1 IFIT3 TLR8 LILRB2 CTSS TRIM25 TLR2 HCK IFIT2 CMPK2 TAP1 THEMIS2 IRF1 TNFRSF1B LILRB3 AQP9 DHX58 APOBEC3A DDX60L AOAH ACSL1 MPEG1 PILRA PRKCD MYD88 RNF19B TRIM22 PIK3AP1 PIK3R5 IL10RA SAMD9 PARP14 IRF7 ITGAX ELF4 HCLS1 CCR1 RSAD2 ADGRE2 CSF2RB LILRA6 LAPTM5 GBP2 AP5B1 WIPF1 L…	0.00122408	#440154	0.5	0	12	1.95609
4277	10.5062	-1.05471	Cluster 10	Integrated Stress Response Signaling (GO:0140467)	NFE2 BATF2 BATF3 JUN EIF2AK2 EIF2AK4 FOS EIF2AK3 MAFB BATF EIF2S1 CREB3 MAF IMPACT FOSL1 DDIT3 QRICH1 NFE2L2 NFE2L3 CEBPA CEBPB CEBPD CEBPE CEBPG OMA1 CREBZF MAP3K20 JUNB GCN1 CEBPB BCL3 SBNO2 ZC3H12A TNIP1 PIM3 MGAT1 MAN2B1 TRIM25 RELB EHD1 NFKB2 OGFR GRN FOSL2 MAPKAPK2 TNFRSF1B ICAM1 TICAM1 MYO9B JUNB NINJ1 ELF4 RNF19B SOCS3 PLAUR CTSZ PFKFB3 AP5B1 CEBPD EMILIN2 UNC93B1 AMPD3 FCGRT CSRNP1 LILRB…	3.00971e-09	#aec7e8	0.5	0	12	4.76074		118	9.74767	-1.31355	Cluster 0	Dendritic Cell Differentiation (GO:0097028)	BATF2 BATF3 LYN FLT3 CSF2 LILRB1 CLU DHRS2 TREM2 TGFBR2 BATF IL4 DCSTAMP UBD IRF8 F2RL1 CAMK4 PRTN3 CCR7 CCL19 LGALS9 GAS6 LGALS9 SLC15A3 TNIP1 TNFRSF1B TAP1 MAN2B1 LILRB2 CTSZ SQRDL BCL3 RELB TYMP LILRB4 MGAT1 CD274 UNC93B1 LILRB1 TRAF1 NINJ1 HCK GRN DHX58 NFKB2 PILRA CD68 CCR5 IRF5 RNF19B MYO9B FCGRT PIK3R5 IL10RA CD40 LAPTM5 EHD1 TNFRSF14 SIGLEC1 EMILIN2 LYN CD4 CYBA SLAMF7 PLEKHO1 HLA.A TNFAI…	4.70103e-10	#440154	0.5	0	12	5.1639		118	9.74767	-1.31355	Cluster 0	Dendritic Cell Differentiation (GO:0097028)	BATF2 BATF3 LYN FLT3 CSF2 LILRB1 CLU DHRS2 TREM2 TGFBR2 BATF IL4 DCSTAMP UBD IRF8 F2RL1 CAMK4 PRTN3 CCR7 CCL19 LGALS9 GAS6 LGALS9 SLC15A3 TNIP1 TNFRSF1B TAP1 MAN2B1 LILRB2 CTSZ SQRDL BCL3 RELB TYMP LILRB4 MGAT1 CD274 UNC93B1 LILRB1 TRAF1 NINJ1 HCK GRN DHX58 NFKB2 PILRA CD68 CCR5 IRF5 RNF19B MYO9B FCGRT PIK3R5 IL10RA CD40 LAPTM5 EHD1 TNFRSF14 SIGLEC1 EMILIN2 LYN CD4 CYBA SLAMF7 PLEKHO1 HLA.A TNFAI…	0.0169829	#440154	0.5	0	12	1.38499
4278	10.619	-0.892559	Cluster 10	Regulation Of Adiponectin Secretion (GO:0070163)	IL1B RAB11FIP1 HCAR2 PPARG RAB11FIP3 RAB11FIP5 HCAR2 IL1B HCAR3 PTGS2 SBNO2 CXCL8 SOCS3 RAB11FIP5 ZC3H12A RAB11FIP1 BCL3 PFKFB3 RAB11FIP3 PPARG LRP10 RNF19B MAPKAPK2 ACSL1 TREM1 CEBPB TRIM25 EHD1 TNIP1 KDM6B TMEM127 AQP9 TFE3 NAMPT FOSL2 IER3 BCL6 GRINA PLAUR ZNF646 SIRPA FBRS CSNK1D CHMP4B IRAK2 VASP SPSB1 IL1A MVP CAMTA2 TLR2 TICAM1 STK40 HELZ2 METRNL LIPN PIM3 TMBIM1 LILRB2 SRC ARHGEF11 LILRB3…	7.59016e-07	#aec7e8	0.5	0	12	3.55987		119	8.20322	-0.928247	Cluster 0	Granulocyte Activation (GO:0036230)	CXCL8 KMT2E PRKCD CXCR2 IL15 PREX1 CCL5 PRG3 F2RL1 CTSG CXCL6 CAMP PRKCD HCK LILRB3 MYO1F NCF2 APOBR NFAM1 CEACAM3 ADGRG3 CSF2RB ITGAX TLR2 ARRB2 SIRPB1 FMNL1 SPI1 IL17RA SIGLEC5 C10ORF54 THEMIS2 FPR1 ADAM8 NADK FGR NCF1B FPR2 P2RY13 LITAF LYN AP5B1 TLR8 PGLYRP1 PTAFR VASP PADI4 WAS CXCR2 TNFRSF10C EVI2B CFP C5AR1 GMIP GPSM3 AC018755.18 LILRB2 ABTB1 ARAP1 AQP9 PILRA ZDHHC18 CXCR1 SMAP2 SIRPB2 NOD…	6.78739e-05	#440154	0.5	0	12	2.58415		119	8.20322	-0.928247	Cluster 0	Granulocyte Activation (GO:0036230)	CXCL8 KMT2E PRKCD CXCR2 IL15 PREX1 CCL5 PRG3 F2RL1 CTSG CXCL6 CAMP PRKCD HCK LILRB3 MYO1F NCF2 APOBR NFAM1 CEACAM3 ADGRG3 CSF2RB ITGAX TLR2 ARRB2 SIRPB1 FMNL1 SPI1 IL17RA SIGLEC5 C10ORF54 THEMIS2 FPR1 ADAM8 NADK FGR NCF1B FPR2 P2RY13 LITAF LYN AP5B1 TLR8 PGLYRP1 PTAFR VASP PADI4 WAS CXCR2 TNFRSF10C EVI2B CFP C5AR1 GMIP GPSM3 AC018755.18 LILRB2 ABTB1 ARAP1 AQP9 PILRA ZDHHC18 CXCR1 SMAP2 SIRPB2 NOD…	0.0169829	#440154	0.5	0	12	1.38499
4279	10.8796	-1.0798	Cluster 10	Positive Regulation Of Astrocyte Differentiation (GO:0048711)	TTBK1 NOTCH1 BMP2 SERPINE2 ID2 CLCF1 HES1 BMP2 SERPINE2 CLCF1 NOTCH1 HES1 ID2 TTBK1 CLIP2 PXDC1 JUN SULF1 PIP5K1C MMP14 VIM ZC3H12A CADM4 MRC2 NCS1 SPTAN1 ABR DENND5A PFKFB3 SIRPA ARL8A SPSB1 PLEKHM2 PCDHGC3 ICAM1 ARHGEF11 HTRA1 PTX3 TIMP2 RNF19B IER3 PRNP TTYH3 SPON1 GPC1 EHD1 ATN1 IL27 CD44 CIC NACC2 SOCS3 CTIF MEGF8 LRP1 NLGN2 DKK3 SKI SPHK1 SH3PXD2A SBF1 APP LAMP1 ATF3 MTSS1L PTGS2 GRINA NIPA…	0.0126763	#aec7e8	0.5	0	12	1.4485		120	8.31154	-1.26573	Cluster 0	Dendritic Cell Chemotaxis (GO:0002407)	CCR2 CCR1 CCL21 HMGB1 CLU PIK3CG CXCR2 CXCR1 CXCR4 GPR183 CCL5 CCR7 CCR6 CCR5 TRPM4 HCLS1 HCK HLA.E NCF2 SELPLG CYTH4 MYO1F CD53 CSF2RB EVI2B LILRB3 GPSM3 ARRB2 ITGAX THEMIS2 TLR8 NFAM1 LCP1 LAPTM5 ARHGAP30 WAS WIPF1 FMNL1 C10ORF54 FPR1 SMAP2 HLA.B LITAF PIK3R5 LYN TNFRSF1B PTAFR CCR1 CTSS PILRA RASSF5 LSP1 LRRC25 CDC42SE1 P2RY13 CXCR2 CXCR1 APOBR AOAH NCF1B TLR2 SPI1 C5AR1 ABTB1 CORO1A FPR2 ARHG…	3.38354e-07	#440154	0.5	0	12	3.73531		120	8.31154	-1.26573	Cluster 0	Dendritic Cell Chemotaxis (GO:0002407)	CCR2 CCR1 CCL21 HMGB1 CLU PIK3CG CXCR2 CXCR1 CXCR4 GPR183 CCL5 CCR7 CCR6 CCR5 TRPM4 HCLS1 HCK HLA.E NCF2 SELPLG CYTH4 MYO1F CD53 CSF2RB EVI2B LILRB3 GPSM3 ARRB2 ITGAX THEMIS2 TLR8 NFAM1 LCP1 LAPTM5 ARHGAP30 WAS WIPF1 FMNL1 C10ORF54 FPR1 SMAP2 HLA.B LITAF PIK3R5 LYN TNFRSF1B PTAFR CCR1 CTSS PILRA RASSF5 LSP1 LRRC25 CDC42SE1 P2RY13 CXCR2 CXCR1 APOBR AOAH NCF1B TLR2 SPI1 C5AR1 ABTB1 CORO1A FPR2 ARHG…	0.0317009	#440154	0.5	0	12	1.24946
4280	10.6318	-0.781818	Cluster 10	Negative Regulation Of Signaling (GO:0023057)	PTPN1 IL11 ADIPOQ BRAP SRMS MPIG6B IGFBP3 LIF OSM OPRM1 AP1AR IL1B NLRP12 KIF26A OPTN HSP90AB1 HHIP PCSK9 PPP3CA INPP5D PPP3CB ERBB3 VHL TRAT1 UBASH3B FGF23 LDLR SOCS5 PTPN1 LIF IER3 ZC3H12A PTGS2 IRAK2 ISY1.RAB43 TRIM25 SBNO2 ZDHHC5 MAPKAPK2 PFKFB3 B4GALT5 RAB35 UBASH3B MYH9 FOSL2 ATP13A3 IL1B KHNYN SUPT6H IGF2R EHD1 TNIP1 HELZ2 NFKB2 CXCL8 OPTN TLN1 ACSL1 OSM LDLR ABCC1 RNF19B NFKB1 TMEM127 TRA…	0.00557303	#aec7e8	0.5	0	12	1.62695		121	8.15264	-1.27577	Cluster 0	Delamination (GO:0060232)	AKNA YTHDF2 SPI1 CDSN METTL3 TRPV4 SPI1 AKNA FMNL1 WAS MYO1F ARRB2 NFAM1 ARHGAP45 C10ORF54 ADAM8 PLCB2 LRRC25 ARAP1 HCK NBEAL2 GMIP ARHGAP30 LILRB3 GPSM3 APOBR FGD3 TCIRG1 ABTB1 ITGAX CORO1A THEMIS2 ARHGEF1 CFP CYTH4 HLA.B EFHD2 ARHGAP4 FPR1 ARHGAP27 ADGRE5 ZDHHC18 GRK2 FGR RIN3 OSCAR CSF2RB NCF1B LAPTM5 SMAP2 DOK3 LSP1 SELPLG NCF1 IL17RA VASP CXCR1 ARHGAP9 R3HDM4 PIK3CD RASGRP4 NADK MMP25 C5AR1 …	0.000979961	#440154	0.5	0	12	2.0044		121	8.15264	-1.27577	Cluster 0	Delamination (GO:0060232)	AKNA YTHDF2 SPI1 CDSN METTL3 TRPV4 SPI1 AKNA FMNL1 WAS MYO1F ARRB2 NFAM1 ARHGAP45 C10ORF54 ADAM8 PLCB2 LRRC25 ARAP1 HCK NBEAL2 GMIP ARHGAP30 LILRB3 GPSM3 APOBR FGD3 TCIRG1 ABTB1 ITGAX CORO1A THEMIS2 ARHGEF1 CFP CYTH4 HLA.B EFHD2 ARHGAP4 FPR1 ARHGAP27 ADGRE5 ZDHHC18 GRK2 FGR RIN3 OSCAR CSF2RB NCF1B LAPTM5 SMAP2 DOK3 LSP1 SELPLG NCF1 IL17RA VASP CXCR1 ARHGAP9 R3HDM4 PIK3CD RASGRP4 NADK MMP25 C5AR1 …	0.00870252	#440154	0.5	0	12	1.53018
4281	10.6695	-1.13535	Cluster 10	Regulation Of Complement Activation (GO:0030449)	CR1 IL1B PHB2 PHB1 CFH CR1L SUSD4 CD59 CD55 CD55 CD59 CFH CR1L ACSL1 IL1B CR1 NAMPT PICALM LIPN AQP9 TLR4 TRIM25 DDX60L TLR8 TLR2 SUSD4 BACH1 PTGS2 IRAK2 RNF19B PLAUR SGMS2 STEAP4 LRRK2 IGF2R RNF149 LYN CAST IL1A PHB2 CXCL8 SLC6A6 TREML4 CPQ ZC3H12A FAM129A TMBIM1 USP12 SPSB1 IER3 NCF2 TNIP1 CXCL3 HCAR2 PTPRJ IFNGR2 OGFRL1 VNN1 MAPKAPK2 ANXA11 IL13RA1 CEBPB OLR1 SOCS3 BCL3 ADGRE2 IL6R SBNO2 TLN1 …	3.60019e-08	#aec7e8	0.5	0	12	4.22184		122	9.61797	-0.954226	Cluster 0	Cell Surface Toll-Like Receptor Signaling Pathway (GO:0140895)	TRIL TIRAP NR1H4 LY96 SCIMP OAS1 MYD88 MYO1C TNIP2 TNIP3 IRAK1 S100A14 RIPK2 LGALS9 PIK3AP1 TLR4 LGALS9 HCK LILRB2 TNFRSF1B TNIP1 SLC15A3 PILRA BCL3 NCF2 TRIM25 PIK3AP1 MGAT1 LYN TYMP PRKCD UNC93B1 MYD88 OAS1 TLR2 MAN2B1 GRN CTSS SQRDL OSCAR ELF4 VASP TAP1 LITAF CTSZ NINJ1 TNFAIP2 SIGLEC9 PIK3R5 SBNO2 THEMIS2 RNF19B NOD2 CD68 LILRB3 ARAP1 HELZ2 STX11 LAPTM5 SIGLEC1 ITGAX CCR1 TLR8 OGFR FCGRT MX2 …	6.41738e-10	#440154	0.5	0	12	5.09632		122	9.61797	-0.954226	Cluster 0	Cell Surface Toll-Like Receptor Signaling Pathway (GO:0140895)	TRIL TIRAP NR1H4 LY96 SCIMP OAS1 MYD88 MYO1C TNIP2 TNIP3 IRAK1 S100A14 RIPK2 LGALS9 PIK3AP1 TLR4 LGALS9 HCK LILRB2 TNFRSF1B TNIP1 SLC15A3 PILRA BCL3 NCF2 TRIM25 PIK3AP1 MGAT1 LYN TYMP PRKCD UNC93B1 MYD88 OAS1 TLR2 MAN2B1 GRN CTSS SQRDL OSCAR ELF4 VASP TAP1 LITAF CTSZ NINJ1 TNFAIP2 SIGLEC9 PIK3R5 SBNO2 THEMIS2 RNF19B NOD2 CD68 LILRB3 ARAP1 HELZ2 STX11 LAPTM5 SIGLEC1 ITGAX CCR1 TLR8 OGFR FCGRT MX2 …	0.162797	#440154	0.5	0	5	0.894177
4282	10.6706	-0.972122	Cluster 10	Negative Regulation Of Signal Transduction In Absence Of Ligand (GO:1901099)	MAP2K5 EYA1 EYA2 UNC5B CSF2 EYA3 EYA4 TNF IFI6 GATA1 IL1A IL1B TERT GDNF BCL2L1 SNAI2 HSPA1A BCL2 PF4 MAPK7 MCL1 HSPA1B IL1B TNF IL1A ZC3H12A CXCL3 EHD1 TNIP1 PTGS2 IRAK2 IER3 SERPINB2 PLAUR PFKFB3 TICAM1 NFKB2 HELZ2 ADORA2A TRAF1 RNF19B NFKB1 STX11 SRC MAPKAPK2 CXCL8 GPR84 MOB3C SBNO2 CD274 AMPD3 SOCS3 PIM3 ICAM1 SPHK1 BCL3 CEBPB ELL IER5 FOSL2 MAP2K3 IL6 NLRP3 GRAMD1A TRIM25 MSC CCRL2 AC013444.…	3.07365e-06	#aec7e8	0.5	0	12	3.25617		123	8.85417	-2.28184	Cluster 0	Positive Regulation Of T Cell Activation (GO:0050870)	CD70 VCAM1 SMARCA2 CYRIB SMARCA4 IL23A CD6 CD209 LEP IL6ST CD86 SMARCB1 CD81 CD80 NOD2 PNP ACTB PYCARD ZMIZ1 B2M HLA-DOB HLA-DOA XBP1 HLA-DRB5 NCKAP1L ACTL6A ACTL6B HLA-A CCDC88B PRKCQ HLA-DRB4 HLA-DRB3 CLECL1P HLA-DRB1 CD276 CD274 IL23R TFRC SIRPG DOCK8 ZBTB1 GATA3 CD1D IL36B ABL2 SIRPA FLOT2 TNFSF11 IL12B LGALS9 ARID2 CCR2 ANXA1 IL15 PHF10 SMARCE1 RHOH LILRB2 PDCD1LG2 TYK2 IL1B IL4 PTPRC IL7 IL…	2.78272e-08	#440154	0.5	0	12	4.27777		123	8.85417	-2.28184	Cluster 0	Positive Regulation Of T Cell Activation (GO:0050870)	CD70 VCAM1 SMARCA2 CYRIB SMARCA4 IL23A CD6 CD209 LEP IL6ST CD86 SMARCB1 CD81 CD80 NOD2 PNP ACTB PYCARD ZMIZ1 B2M HLA-DOB HLA-DOA XBP1 HLA-DRB5 NCKAP1L ACTL6A ACTL6B HLA-A CCDC88B PRKCQ HLA-DRB4 HLA-DRB3 CLECL1P HLA-DRB1 CD276 CD274 IL23R TFRC SIRPG DOCK8 ZBTB1 GATA3 CD1D IL36B ABL2 SIRPA FLOT2 TNFSF11 IL12B LGALS9 ARID2 CCR2 ANXA1 IL15 PHF10 SMARCE1 RHOH LILRB2 PDCD1LG2 TYK2 IL1B IL4 PTPRC IL7 IL…	0.128168	#440154	0.5	0	5	0.946109
4283	10.4972	-0.18198	Cluster 10	Regulation Of Cellular Metabolic Process (GO:0031323)	ZBTB7A PNPT1 PPARA NEK6 MBOAT7 PGAM1 CIDEB VASH1 JMJD8 NUAK1 COQ7 RNF41 GCK RSL1D1 NCOR2 EIF6 PINK1 NPC2 STK17A ANGPTL8 GNB3 OGT STUB1 BMAL1 PID1 ARF4 PRKN RNF34 PANK2 PRKAG2 ARL2 PRKAG1 SLC2A6 HIF1A FOXM1 ING2 PARL EP300 PDK4 MPV17 CYP1B1 NEK4 BCO2 PDK3 PDK2 GRN PLEKHM2 GRINA AKT1S1 MGAT1 CTSZ TOM1 RAB35 SPHK1 RNH1 STUB1 SLC2A6 TRIP10 GAA ABCD1 TSPAN4 TFE3 RAB5C TNIP1 JMJD8 LAMP1 CEBPB MAN2B1 NP…	5.46265e-09	#aec7e8	0.5	0	12	4.6313		124	8.45387	-1.2507	Cluster 0	Cellular Defense Response (GO:0006968)	CCR2 KLRC3 KIR2DS3 VEZF1 LILRB2 KIR3DL2 TYROBP HLA-G DCDC2 NCR2 FOSL1 ADORA2A NCR1 MNDA CD300C NCF1 ITK BECN1 ITGB1 RELA FCMR CXCL9 NCF2 C5AR1 LSP1 CX3CR1 LGALS3BP CD5L TCIRG1 PRF1 EHHADH LY96 UMOD KIR2DL4 RAB23 IL1RL2 SPN GNLY CXCR2 CLEC5A PTK2B TRAT1 KLRC2 CCR6 CCR5 ZNF148 KLRG1 CCR3 HCK NCF2 MYO1F LILRB3 ARRB2 HCLS1 ITGAX HLA.E WAS THEMIS2 GPSM3 CYTH4 TNFRSF1B FMNL1 SPI1 NFAM1 PILRA FGR LAPTM5…	0.000215408	#440154	0.5	0	12	2.33337		124	8.45387	-1.2507	Cluster 0	Cellular Defense Response (GO:0006968)	CCR2 KLRC3 KIR2DS3 VEZF1 LILRB2 KIR3DL2 TYROBP HLA-G DCDC2 NCR2 FOSL1 ADORA2A NCR1 MNDA CD300C NCF1 ITK BECN1 ITGB1 RELA FCMR CXCL9 NCF2 C5AR1 LSP1 CX3CR1 LGALS3BP CD5L TCIRG1 PRF1 EHHADH LY96 UMOD KIR2DL4 RAB23 IL1RL2 SPN GNLY CXCR2 CLEC5A PTK2B TRAT1 KLRC2 CCR6 CCR5 ZNF148 KLRG1 CCR3 HCK NCF2 MYO1F LILRB3 ARRB2 HCLS1 ITGAX HLA.E WAS THEMIS2 GPSM3 CYTH4 TNFRSF1B FMNL1 SPI1 NFAM1 PILRA FGR LAPTM5…	0.0267836	#440154	0.5	0	12	1.28607
4284	10.5412	-0.6848	Cluster 10	Positive Regulation Of Brown Fat Cell Differentiation (GO:0090336)	NAPEPLD HNRNPU SIX1 SOX13 METRNL INS PTGS2 FNDC5 TFE3 PIM1 RREB1 ZBTB7B VSTM2A TFE3 METRNL MAPKAPK2 SBNO2 PLEKHM2 ARHGEF11 EHBP1L1 PFKFB3 PTGS2 CEBPB BCL3 MAFG TNIP1 ZC3H12A MYO9B FOSL2 STK40 OGFR FBRS DNM2 TMEM63B ARHGEF2 TRIP10 GRINA RAB35 GAK PIM1 SUPT6H KDM5C CHMP4B UPF1 LAMP1 SRRM2 EHD1 NCOR2 RREB1 RNF19B TMEM127 UBR4 MGAT1 GRAMD1A SOCS3 AMPD3 ABCD1 RXRA TAOK2 NUCB1 ZNF865 DOT1L NFKB2 GAA SL…	0.0266143	#aec7e8	0.5	0	12	1.28744		125	8.4419	-1.04388	Cluster 0	Regulation Of Protein Localization To Chromatin (GO:1905634)	VCPIP1 PIAS4 SPI1 VCP SIRT6 VRK1 SETD2 WAPL RNF4 WAPL RNF4 VCP VASP VCPIP1 PIAS4 SPI1 SIRT6 RAB35 XPO6 SETD2 LMNB1 FMNL1 ELF4 GRK6 ARAP1 CSK ELL TRAPPC10 GATAD2A DCAF15 RPS6KA1 LYN LCP1 SHKBP1 HCK MYO9B ARHGAP45 DOCK2 WAS GMIP AP5B1 HCLS1 NADK ARRB2 ZDHHC18 TACC3 NUP153 DHX34 ADAM8 TRIP12 GRK2 PIK3R5 NCF2 SH3BP1 ARHGAP30 FRAT2 KLF16 DOK3 NBEAL2 SMAP2 CNOT1 TGFB1 APOBR MYO1F CTDP1 ADGRE5 C15ORF39 …	0.0018718	#440154	0.5	0	12	1.86387		125	8.4419	-1.04388	Cluster 0	Regulation Of Protein Localization To Chromatin (GO:1905634)	VCPIP1 PIAS4 SPI1 VCP SIRT6 VRK1 SETD2 WAPL RNF4 WAPL RNF4 VCP VASP VCPIP1 PIAS4 SPI1 SIRT6 RAB35 XPO6 SETD2 LMNB1 FMNL1 ELF4 GRK6 ARAP1 CSK ELL TRAPPC10 GATAD2A DCAF15 RPS6KA1 LYN LCP1 SHKBP1 HCK MYO9B ARHGAP45 DOCK2 WAS GMIP AP5B1 HCLS1 NADK ARRB2 ZDHHC18 TACC3 NUP153 DHX34 ADAM8 TRIP12 GRK2 PIK3R5 NCF2 SH3BP1 ARHGAP30 FRAT2 KLF16 DOK3 NBEAL2 SMAP2 CNOT1 TGFB1 APOBR MYO1F CTDP1 ADGRE5 C15ORF39 …	0.0224559	#440154	0.5	0	12	1.32433
4285	10.8311	-0.874819	Cluster 10	Negative Regulation Of Morphogenesis Of An Epithelium (GO:1905331)	TBX2 TACSTD2 TNF SULF1 NKD1 TBX2 SULF1 TACSTD2 NKD1 TNF IER3 SRC ZC3H12A RRBP1 ICAM1 PLXNB2 ITPKC LAMB2 UBE2Z SDC4 TRIP10 AKT1 NECTIN2 SPHK1 DVL3 SPON1 TMEM63B SULF2 HSPB1 SERPINB2 SPSB1 ADGRA2 NIPAL4 MMP19 SNX33 IL1B SH3PXD2A C17ORF96 PTK7 METRNL LAMP1 HDLBP PFKFB3 SOCS3 DRAM1 CXCL3 SLC12A4 TJP2 CDC42BPB COL16A1 NOTUM RARG TNKS1BP1 IL27 TICAM1 PPARD MAPKAPK2 CHMP4B TRAF1 FKBP10 CCL3L3 CLCF1 ARFG…	0.000165914	#aec7e8	0.5	0	12	2.39006		126	8.38581	0.0579365	Cluster 0	Positive Regulation Of T Cell Chemotaxis (GO:0010820)	CCR2 CXCL13 ADAM17 WNK1 CCL21 XCL1 WNT5A STK39 CCL5 S100A7 XCL2 OXSR1 XCL2 XCL1 RP11.74D7.1 CXCL13 WNK1 OXSR1 CCL21 IL12RB2 S100A7 ADAM17 CCR2 TRIP12 STK39 TNFRSF9 TRIM21 KLRC4.KLRK1 DDX60 RP4.738P11.3 IGF2R LAG3 CD8A WNT5A ACTR3 TLN1 SLFN5 PICALM ACTR2 WDR26 RP11.402J7.2 ZCCHC2 MYH9 TRAPPC10 PARP14 TRBV10.2 GBP2 PTPRC IL2RG AHNAK IL36RN CCL5 SP1 GZMB ZDHHC5 VAMP1 KHNYN KLRC3 MFSD6 IQGAP1 GJB6 IS…	0.0202445	#440154	0.5	0	12	1.34685		126	8.38581	0.0579365	Cluster 0	Positive Regulation Of T Cell Chemotaxis (GO:0010820)	CCR2 CXCL13 ADAM17 WNK1 CCL21 XCL1 WNT5A STK39 CCL5 S100A7 XCL2 OXSR1 XCL2 XCL1 RP11.74D7.1 CXCL13 WNK1 OXSR1 CCL21 IL12RB2 S100A7 ADAM17 CCR2 TRIP12 STK39 TNFRSF9 TRIM21 KLRC4.KLRK1 DDX60 RP4.738P11.3 IGF2R LAG3 CD8A WNT5A ACTR3 TLN1 SLFN5 PICALM ACTR2 WDR26 RP11.402J7.2 ZCCHC2 MYH9 TRAPPC10 PARP14 TRBV10.2 GBP2 PTPRC IL2RG AHNAK IL36RN CCL5 SP1 GZMB ZDHHC5 VAMP1 KHNYN KLRC3 MFSD6 IQGAP1 GJB6 IS…	0.0154015	#440154	0.5	0	12	1.40622
4286	10.6688	-1.05083	Cluster 10	Positive Regulation Of I-kappaB Phosphorylation (GO:1903721)	DDRGK1 CX3CR1 TNF PLCG2 CX3CL1 DDRGK1 TNF CX3CL1 PLCG2 CX3CR1 ZC3H12A ICAM1 PFKFB3 OGFR TNIP1 EHD1 TRAF1 RNF19B SBNO2 IER3 GRAMD1A PIM3 NFKB2 SOD2 MMP19 SOCS3 SRC GAA HELZ2 AMPD3 OASL SLAMF7 CCL3L3 IL27 IL1B SPHK1 NINJ1 TICAM1 C17ORF96 CXCL3 PLEKHM2 DHX58 NFKB1 GPR132 IL1RN CCR5 SERPINB2 GPR84 TNFAIP2 ARHGEF11 NIPAL4 BCL3 PLAUR ADORA2A ARID5A TNFRSF1B CCL3 C1QC UNC93B1 VAV1 SEMA6B IL10 SIRPA MYO9…	2.47032e-05	#aec7e8	0.5	0	12	2.80362		127	8.84466	-1.80373	Cluster 0	Positive Regulation Of T Cell Differentiation (GO:0045582)	PHF10 SMARCE1 RHOH LILRB2 SOX12 LILRB4 SMARCA2 SMARCA4 FOXP3 IL4 IL7 IL23A BCL6 TNFSF4 HLA-DRA TNFSF9 ADAM8 LEF1 SMARCB1 IHH FOXO3 PNP DUSP10 MDK SOCS1 SHH ZMIZ1 PCK1 IL12RB1 CR1 SMARCC1 SMARCC2 XBP1 PBRM1 NCKAP1L ACTL6A ACTL6B ARID1A ARID1B HLA-G ZAP70 VNN1 CD46 HLA-DRB1 SMARCD1 SMARCD2 SMARCD3 IL23R ZBTB1 GLI2 AMBRA1 GATA3 VSIR NKAP GLI3 IL4I1 SART1 SOX4 IL36B KAT5 TESPA1 IL12B BRD7 ARID2 CYTH1…	0.000979961	#440154	0.5	0	12	2.0044		127	8.84466	-1.80373	Cluster 0	Positive Regulation Of T Cell Differentiation (GO:0045582)	PHF10 SMARCE1 RHOH LILRB2 SOX12 LILRB4 SMARCA2 SMARCA4 FOXP3 IL4 IL7 IL23A BCL6 TNFSF4 HLA-DRA TNFSF9 ADAM8 LEF1 SMARCB1 IHH FOXO3 PNP DUSP10 MDK SOCS1 SHH ZMIZ1 PCK1 IL12RB1 CR1 SMARCC1 SMARCC2 XBP1 PBRM1 NCKAP1L ACTL6A ACTL6B ARID1A ARID1B HLA-G ZAP70 VNN1 CD46 HLA-DRB1 SMARCD1 SMARCD2 SMARCD3 IL23R ZBTB1 GLI2 AMBRA1 GATA3 VSIR NKAP GLI3 IL4I1 SART1 SOX4 IL36B KAT5 TESPA1 IL12B BRD7 ARID2 CYTH1…	0.122109	#440154	0.5	0	5	0.956626
4287	10.7452	-0.510366	Cluster 10	Positive Regulation Of Calcium Ion Import (GO:0090280)	PDGFRB CXCL12 LGALS3 SPHK2 STC1 CCL3 PDGFB PDGFB LGALS3 CCL3 TSPAN4 CSF1 PDGFRB SPHK1 ENG CXCL12 MMP19 ICAM1 TRIP10 METRNL IER3 PLAUR FCGRT SPSB1 MSC CCL3L3 SOCS3 LAMP1 CFD CTSZ EHD1 MXRA8 GRN SQRDL TNIP1 NUCB1 MGAT1 PFKFB3 MAP2K3 SRC PLXND1 EHD2 TNF RRAS AMPD3 NINJ1 MMP14 ARHGAP31 NAGLU PXDC1 GGT5 CEBPB BCL3 STC1 DRAM1 SPHK2 LRRC32 CD68 RAB7B LRP1 EFEMP2 SNX9 NBL1 ADORA2A C1QC ADGRA2 RASL11A EPA…	1.41293e-08	#aec7e8	0.5	0	12	4.42494		128	8.12844	-0.723863	Cluster 0	Cellular Response To Bacterial Lipopeptide (GO:0071221)	TLR2 TLR1 TIRAP TLR10 CD36 TLR6 TLR6 TLR1 TLR2 TLR8 NCF2 VNN2 LYN FPR2 CLEC7A P2RY13 MNDA CTSS TMEM154 TLR4 HCK EVI2B CSF2RB MXD1 SSH2 IL17RA PLXNC1 TNFRSF10C RNF149 ITGAX LCP1 LRRK2 GCA DOCK8 THEMIS2 FGL2 FAM65B PTAFR GLT1D1 FPR1 MYO1F PTPRC AQP9 LILRB3 SMAP2 RASSF2 NAMPT SIGLEC9 C5AR1 HCLS1 WIPF1 NFAM1 CXCR2 SIRPB1 ALOX5 LRRC25 NCF1B NLRC4 CLEC4E ADGRE3 CPPED1 FAM129A IGSF6 ADGRE2 ACSL1 JAML CR…	1.19233e-10	#440154	0.5	0	12	5.4618		128	8.12844	-0.723863	Cluster 0	Cellular Response To Bacterial Lipopeptide (GO:0071221)	TLR2 TLR1 TIRAP TLR10 CD36 TLR6 TLR6 TLR1 TLR2 TLR8 NCF2 VNN2 LYN FPR2 CLEC7A P2RY13 MNDA CTSS TMEM154 TLR4 HCK EVI2B CSF2RB MXD1 SSH2 IL17RA PLXNC1 TNFRSF10C RNF149 ITGAX LCP1 LRRK2 GCA DOCK8 THEMIS2 FGL2 FAM65B PTAFR GLT1D1 FPR1 MYO1F PTPRC AQP9 LILRB3 SMAP2 RASSF2 NAMPT SIGLEC9 C5AR1 HCLS1 WIPF1 NFAM1 CXCR2 SIRPB1 ALOX5 LRRC25 NCF1B NLRC4 CLEC4E ADGRE3 CPPED1 FAM129A IGSF6 ADGRE2 ACSL1 JAML CR…	0.189843	#440154	0.5	0	5	0.860802
4288	10.603	-0.550995	Cluster 10	Positive Regulation Of Calcium Ion Transport (GO:0051928)	CCR1 PDGFRB TRPC6 WFS1 FFAR1 F2R SPHK2 ATP2B1 CACNB2 CXCL12 STIM2 P2RX4 WNK3 ORAI1 LILRP2 CAMK2A STC1 PDGFB ATP2A1 CACNA1D LILRA2 CRACR2A MYLK LGALS3 CCL5 CCL4 CCL3 CCL2 STRIT1 CCL3 CCR5 NINJ1 CD68 SLC43A2 LILRB4 MMP19 PLAUR ADORA2A SQRDL P2RX4 AMPD3 SIRPA GPR84 SLC15A3 TNFRSF1B DRAM1 CCR1 CCL3L3 PILRA FCGRT CCL2 CEBPB EMILIN2 ICAM1 SPHK1 LILRB2 CTSZ PLEKHO2 MSC LILRB5 C3AR1 CTSB TOM1 SLC2A6 CCRL…	2.00103e-08	#aec7e8	0.5	0	12	4.34937		129	7.85088	-1.92234	Cluster 0	Cellular Response To Corticosteroid Stimulus (GO:0071384)	ANXA1 HNRNPU ZFP36L1 FAM107A SSTR2 ISL1 NR3C1 SSTR4 UBE2L3 SSTR5 ZFP36L2 BCL2L11 ZFP36 REST GPER1 ZFP36 ZFP36L2 NR3C1 ZFP36L1 BCL2L11 ANXA1 JUNB KLF6 REST TNFAIP3 CSRNP1 NFKBIA LRRFIP1 PPP1R15A TSC22D3 PNRC1 DUSP1 NFKBIZ MCL1 CXCR4 BTG1 GPER1 FOS PTGER4 BTG2 HNRNPU ELF1 STK17B ARID5A RASSF5 BRD2 IRF1 KDM2A SSTR5 RASAL3 MBNL1 ERAP1 LCP1 STK4 PER1 IKZF1 TRAPPC10 AIM1 RHOH AKAP13 IL7R SP100 DOCK2 SA…	2.05737e-08	#440154	0.5	0	12	4.34334		129	7.85088	-1.92234	Cluster 0	Cellular Response To Corticosteroid Stimulus (GO:0071384)	ANXA1 HNRNPU ZFP36L1 FAM107A SSTR2 ISL1 NR3C1 SSTR4 UBE2L3 SSTR5 ZFP36L2 BCL2L11 ZFP36 REST GPER1 ZFP36 ZFP36L2 NR3C1 ZFP36L1 BCL2L11 ANXA1 JUNB KLF6 REST TNFAIP3 CSRNP1 NFKBIA LRRFIP1 PPP1R15A TSC22D3 PNRC1 DUSP1 NFKBIZ MCL1 CXCR4 BTG1 GPER1 FOS PTGER4 BTG2 HNRNPU ELF1 STK17B ARID5A RASSF5 BRD2 IRF1 KDM2A SSTR5 RASAL3 MBNL1 ERAP1 LCP1 STK4 PER1 IKZF1 TRAPPC10 AIM1 RHOH AKAP13 IL7R SP100 DOCK2 SA…	0.854501	#440154	0.5	0	5	0.534144
4289	10.7025	-1.09653	Cluster 10	Regulation Of RNA Biosynthetic Process (GO:2001141)	MED1 CXCL8 IL1B FCN3 NMD3 MITF RALY TNFRSF1B IL1B CXCL8 CXCL3 TNFRSF1B PLAUR TNIP1 GPR84 IRAK2 EHD1 ADORA2A LILRB2 PTGS2 TNF IER3 NINJ1 ZC3H12A ICAM1 SERPINB2 PIK3R5 AMPD3 NFKB2 SRC PFKFB3 CCRL2 NFKB1 BCL3 MSC SLC43A2 SLC15A3 TRAF1 CEBPB MMP19 TNFAIP2 SOCS3 CCR5 RNF19B PILRA SLC2A6 CD68 PIM3 TLR2 OLR1 EMILIN2 SPHK1 TICAM1 LILRB1 CTSZ MAN2B1 GRAMD1A IL1RN PPIF RELB STX11 MAPKAPK2 ATP13A3 SOD2 HCK …	1.6503e-11	#aec7e8	0.5	0	12	5.89122		130	8.78173	-2.57601	Cluster 0	Positive Regulation Of T Cell Mediated Cytotoxicity (GO:0001916)	XCL1 HLA-C MR1 HLA-A HLA-B HLA-G CYRIB HLA-E HLA-F RAET1E RAET1G IL23A HLA-DRA ULBP1 ULBP3 ULBP2 HLA-DRB1 NECTIN2 IL23R HFE PVR CD1E CD1D CD1C CD1B SLC22A13 STX7 FADD IL12B IL12A IL12RB1 MICA MICB CD1E CD1B MICB CCL17 CD1A CD1C IL23A CLEC10A IL12B MR1 ULBP2 LIPA ITGAM MMP12 HFE PVR RAET1G FADD RUFY4 SQRDL IL12RB1 MGAT1 PDCD1LG2 S100A11 FGD2 FURIN LACTB ULBP3 MAN2B1 ZNFX1 EHD4 IL10RA KCNK13 GRN EH…	2.82356e-09	#440154	0.5	0	12	4.7746		130	8.78173	-2.57601	Cluster 0	Positive Regulation Of T Cell Mediated Cytotoxicity (GO:0001916)	XCL1 HLA-C MR1 HLA-A HLA-B HLA-G CYRIB HLA-E HLA-F RAET1E RAET1G IL23A HLA-DRA ULBP1 ULBP3 ULBP2 HLA-DRB1 NECTIN2 IL23R HFE PVR CD1E CD1D CD1C CD1B SLC22A13 STX7 FADD IL12B IL12A IL12RB1 MICA MICB CD1E CD1B MICB CCL17 CD1A CD1C IL23A CLEC10A IL12B MR1 ULBP2 LIPA ITGAM MMP12 HFE PVR RAET1G FADD RUFY4 SQRDL IL12RB1 MGAT1 PDCD1LG2 S100A11 FGD2 FURIN LACTB ULBP3 MAN2B1 ZNFX1 EHD4 IL10RA KCNK13 GRN EH…	0.0225699	#440154	0.5	0	12	1.32324
4290	10.5408	-1.34138	Cluster 10	Response To Purine-Containing Compound (GO:0014074)	RYR2 RYR1 KCNJ11 CITED1 ATF1 STAT1 TRPC3 CLU DUOX1 P2RX7 DUOX2 NT5E CREB1 P2RY6 P2RX4 VGF ENPP1 ADORA2A DGKQ P2RY1 NDUFS4 ADORA1 TLR7 ADA P2RX7 LILRB4 ADORA2A CCR5 SLAMF7 TRAF1 ICAM1 NINJ1 CD274 WI2.1896O14.1 AMPD3 CD40 DHX58 SIGLEC1 TNIP1 RNF19B MSC SQRDL C1QC P2RY6 SLC15A3 CD68 P2RX4 MMP19 LILRB1 PDE4DIP IL1RN EHD1 IL10 LILRB2 GPR84 SLC2A6 CTSZ PLAUR C1QA PFKFB3 RASSF4 TNFRSF1B SOD2 CCRL2 TNFAI…	7.82132e-10	#aec7e8	0.5	0	12	5.05336		131	9.83039	-2.19401	Cluster 0	Cellular Response To dsRNA (GO:0071359)	NPM1 COLEC12 RALB DHX9 MUL1 CGAS STING1 PQBP1 IFIT1 IFIH1 MAVS PDE12 IFNB1 RIOK3 FLOT1 ZCCHC3 RIGI IFIT1 IFIH1 IFIT2 IFIT3 IFNB1 TRIM25 RSAD2 OAS2 HELZ2 OAS3 MX1 OASL CMPK2 DHX58 MX2 DDX58 SAMD9 RNF19B OAS1 STAT1 CXCL11 CMTR1 TNIP1 RALB RAB35 LAP3 ZNFX1 NFKB2 EHD1 B4GALT5 TRIP10 OGFR PI4K2B TRAF1 CXCL10 ICAM1 MAPKAPK2 DDX60L SLAMF7 CD274 USP12 ELF4 IL27 PARP12 DTX3L EPSTI1 ISG15 TICAM1 MUL1 PARP1…	4.80784e-07	#440154	0.5	0	12	3.65903		131	9.83039	-2.19401	Cluster 0	Cellular Response To dsRNA (GO:0071359)	NPM1 COLEC12 RALB DHX9 MUL1 CGAS STING1 PQBP1 IFIT1 IFIH1 MAVS PDE12 IFNB1 RIOK3 FLOT1 ZCCHC3 RIGI IFIT1 IFIH1 IFIT2 IFIT3 IFNB1 TRIM25 RSAD2 OAS2 HELZ2 OAS3 MX1 OASL CMPK2 DHX58 MX2 DDX58 SAMD9 RNF19B OAS1 STAT1 CXCL11 CMTR1 TNIP1 RALB RAB35 LAP3 ZNFX1 NFKB2 EHD1 B4GALT5 TRIP10 OGFR PI4K2B TRAF1 CXCL10 ICAM1 MAPKAPK2 DDX60L SLAMF7 CD274 USP12 ELF4 IL27 PARP12 DTX3L EPSTI1 ISG15 TICAM1 MUL1 PARP1…	0.000103124	#440154	0.5	0	12	2.49332
4291	10.3018	-1.25861	Cluster 10	Regulation Of Chemokine (C-C Motif) Ligand 5 Production (GO:0071649)	DDX3X MAVS IL10 OAS3 SIRPA MUL1 DEFB124 HELZ2 TNIP1 SIRPA RNF19B DHX58 SIGLEC1 LILRB2 TRIM25 OAS3 EHD1 ICAM1 NINJ1 TNFAIP2 TRAF1 IFIT3 IL1RN OAS2 ZC3H12A NFKB2 BCL3 SLAMF7 PILRA CCR5 TNFRSF1B CMPK2 SBNO2 MX2 PFKFB3 LILRB4 IFIT2 SLC15A3 IL10 AMPD3 OGFR MAN2B1 PLAUR CD274 CTSZ RSAD2 CD68 PIK3R5 IL27 MMP19 MX1 EMILIN2 GRN MYO9B HCK GPR84 MGAT1 MSC SRC ARHGEF11 SQRDL MAPKAPK2 OASL GRAMD1A TICAM1 UNC9…	1.1425e-09	#aec7e8	0.5	0	12	4.97107		132	9.8115	-2.2245	Cluster 0	Cellular Response To Exogenous dsRNA (GO:0071360)	COLEC12 RALB DHX9 MUL1 CGAS STING1 PQBP1 IFIT1 IFIH1 MAVS IFNB1 FLOT1 ZCCHC3 RIGI IFIT1 IFIH1 IFIT3 IFIT2 IFNB1 HELZ2 TRIM25 OAS2 RSAD2 OAS3 MX1 OASL CMPK2 DHX58 OGFR RAB35 TNIP1 CMTR1 MX2 RNF19B OAS1 MAPKAPK2 DDX58 EHD1 FLOT1 CXCL11 STAT1 NFKB2 TRIP10 RALB IRF7 ICAM1 TICAM1 SZRD1 SBNO2 PML ISY1.RAB43 UNC93B1 PARP10 APH1A SAMD9 B4GALT5 TRAF1 BCL3 SLAMF7 ISG15 CHMP4B LAP3 GRINA IL27 SIGLEC1 MUL1 C…	8.72985e-07	#440154	0.5	0	12	3.5295		132	9.8115	-2.2245	Cluster 0	Cellular Response To Exogenous dsRNA (GO:0071360)	COLEC12 RALB DHX9 MUL1 CGAS STING1 PQBP1 IFIT1 IFIH1 MAVS IFNB1 FLOT1 ZCCHC3 RIGI IFIT1 IFIH1 IFIT3 IFIT2 IFNB1 HELZ2 TRIM25 OAS2 RSAD2 OAS3 MX1 OASL CMPK2 DHX58 OGFR RAB35 TNIP1 CMTR1 MX2 RNF19B OAS1 MAPKAPK2 DDX58 EHD1 FLOT1 CXCL11 STAT1 NFKB2 TRIP10 RALB IRF7 ICAM1 TICAM1 SZRD1 SBNO2 PML ISY1.RAB43 UNC93B1 PARP10 APH1A SAMD9 B4GALT5 TRAF1 BCL3 SLAMF7 ISG15 CHMP4B LAP3 GRINA IL27 SIGLEC1 MUL1 C…	0.0023888	#440154	0.5	0	12	1.81091
4292	10.6551	-0.981499	Cluster 10	Regulation Of PERK-mediated Unfolded Protein Response (GO:1903897)	PPP1R15B PTPN1 TMEM33 HSPA5 PPP1R15A AGR2 BOK NCK1 NCK2 PTPN1 PPP1R15B PPP1R15A HSPA5 ZC3H12A CSRNP1 NCK1 RIPK1 MAPKAPK2 ICAM1 TICAM1 AGR2 NFKBIA PFKFB3 TNFAIP3 IER3 SPSB1 NCK2 FOSL2 EHD1 TNIP1 GADD45B ZDHHC5 PIM3 NFKB2 DUSP5 SOCS3 TMBIM1 SEC61A1 RNF19B BCL3 KLF6 BOK PLAUR LAMP1 NFKB1 CHMP4B TRIM25 TRIP10 EHD4 ZFP36 TRAF1 SBNO2 RELB NFKBIZ ITPKC SLC39A7 MGAT1 MAFG ISY1.RAB43 IRAK2 NFE2L2 CEBPB SR…	0.000219014	#aec7e8	0.5	0	12	2.32976		133	8.56156	-1.27375	Cluster 0	Regulation Of Protein K63-linked Ubiquitination (GO:1900044)	DDX3X PARP10 GPS2 PTPN22 UBE2V1 NOD2 CEP63 UBE2V2 SASH1 PLAA UBE2N NOD2 UBE2N DDX3X PTPN22 PLAA CD53 EVI2B MX2 LILRB3 UBE2V1 HCLS1 GPS2 LCP1 HCK LYN CEP63 THEMIS2 NCF2 WAS FMNL1 TRIM22 JAML UBE2V2 ARHGAP30 TMEM71 MYD88 AOAH TNFRSF1B FGR LILRB2 LRRC25 RASSF5 ARHGAP25 LILRA6 PARP10 TLR2 STX11 PTPRC NCF1B APOBEC3A OAS2 MYO1F APBB1IP HLA.E ARHGAP9 TLR8 LAPTM5 CD48 PILRA LITAF ITGAX GBP2 RNF149 GPSM3 …	2.23803e-07	#440154	0.5	0	12	3.82507		133	8.56156	-1.27375	Cluster 0	Regulation Of Protein K63-linked Ubiquitination (GO:1900044)	DDX3X PARP10 GPS2 PTPN22 UBE2V1 NOD2 CEP63 UBE2V2 SASH1 PLAA UBE2N NOD2 UBE2N DDX3X PTPN22 PLAA CD53 EVI2B MX2 LILRB3 UBE2V1 HCLS1 GPS2 LCP1 HCK LYN CEP63 THEMIS2 NCF2 WAS FMNL1 TRIM22 JAML UBE2V2 ARHGAP30 TMEM71 MYD88 AOAH TNFRSF1B FGR LILRB2 LRRC25 RASSF5 ARHGAP25 LILRA6 PARP10 TLR2 STX11 PTPRC NCF1B APOBEC3A OAS2 MYO1F APBB1IP HLA.E ARHGAP9 TLR8 LAPTM5 CD48 PILRA LITAF ITGAX GBP2 RNF149 GPSM3 …	0.00848958	#440154	0.5	0	12	1.53556
4293	10.6338	-0.425042	Cluster 10	Response To Progesterone (GO:0032570)	TGFB1 YAP1 SRC TGFB3 TGFB2 WBP2 NR1H3 CAV1 UBE3A THBS1 ACOD1 TRERF1 CSN1S1 LAMP1 SRC TNIP1 MGAT1 EHD1 SPHK1 CHMP4B WDR1 MAPKAPK2 PLEKHM2 CTSZ ACTN1 GRN GRINA MYOF SBNO2 MMP14 TFE3 LASP1 SIRPA RAB35 FAM129B ARHGEF11 PFKFB3 NUCB1 TPM4 MYH9 TGFB1 NDST1 TRIP10 ZDHHC5 ARHGAP31 BCL3 MYO9B SDF4 ICAM1 OGFR CD68 PDCD1LG2 PLAUR SLC15A3 CEBPB THBS1 MMP19 TLN1 SPSB1 ZYX TMBIM1 METRNL MAN2B1 GNAI2 LRP10 TICAM…	8.17848e-05	#aec7e8	0.5	0	12	2.54366		134	7.92147	-1.62704	Cluster 0	Positive Regulation Of Rho Protein Signal Transduction (GO:0035025)	GPR17 GPR18 GPR35 F2R GPR55 GPR4 P2RY10 COL3A1 LPAR6 SYNPO2L APOA1 F2RL1 F2RL2 ARHGEF3 F2RL3 RTN4R PRAG1 GPR20 GPR65 LPAR4 F11R SLC6A2 ROBO1 LPAR1 AKAP13 GPR174 P2RY8 ARRB1 MCF2L RAC1 ADGRG1 AKAP13 WIPF1 HLA.E P2RY10 PTPRC ARHGEF3 DOCK8 PRKCH SSH2 GPR65 CYTH1 NLRC5 CD226 FYB ARRB1 AKNA STK4 GPR174 TEP1 GVINP1 MBNL1 DOCK10 ETS1 P2RY8 GPR55 CDC42SE1 RASSF2 SLC12A6 FAM65B STAT6 TLN1 PBXIP1 IPCEF1 BT…	0.000451491	#440154	0.5	0	12	2.17268		134	7.92147	-1.62704	Cluster 0	Positive Regulation Of Rho Protein Signal Transduction (GO:0035025)	GPR17 GPR18 GPR35 F2R GPR55 GPR4 P2RY10 COL3A1 LPAR6 SYNPO2L APOA1 F2RL1 F2RL2 ARHGEF3 F2RL3 RTN4R PRAG1 GPR20 GPR65 LPAR4 F11R SLC6A2 ROBO1 LPAR1 AKAP13 GPR174 P2RY8 ARRB1 MCF2L RAC1 ADGRG1 AKAP13 WIPF1 HLA.E P2RY10 PTPRC ARHGEF3 DOCK8 PRKCH SSH2 GPR65 CYTH1 NLRC5 CD226 FYB ARRB1 AKNA STK4 GPR174 TEP1 GVINP1 MBNL1 DOCK10 ETS1 P2RY8 GPR55 CDC42SE1 RASSF2 SLC12A6 FAM65B STAT6 TLN1 PBXIP1 IPCEF1 BT…	0.764397	#440154	0.5	0	5	0.558341
4294	9.3568	-1.92368	Cluster 10	Regulation Of NK T Cell Activation (GO:0051133)	HSPH1 IL23A IL23R IL12B IL12A IL12B IL23A IL12A IL23R HSPH1 NFKB1 CYP27B1 CD83 NCR2 CD80 PTGS2 LAMP3 C2ORF80 CD274 SLAMF9 TRAF1 KRT83 IDO1 ZEB2P1 CCL22 MTCYBP22 SLAMF7 RP11.377D9.1 IL4I1 CD40 RP11.397G5.2 AK9 IL10 C15ORF48 DUSP5 TRDC NFKBIA CDCA4 GBP1 GPR31 AMFR CTD.2552B11.3 RNF19B IL15RA IL1RN ADORA2A NR4A3 ZDHHC14 ZNF512B ARHGAP10 HSP90AA1 GS1.257G1.1 IFIH1 ZC3H12A RP13.401N8.3 SAMSN1 GMCL1 TN…	0.0164357	#aec7e8	0.5	0	12	1.39211		135	7.90553	-0.22627	Cluster 0	Regulation Of Programmed Necrotic Cell Death (GO:0062098)	PRKN CYLD NUPR1 CFLAR SPATA2 PELI1 OGT ITCH BIRC2 BIRC3 CFLAR CYLD STK4 PELI1 PTPRC SMCHD1 OGT APOL6 DOCK8 PARP14 RNF213 SSH2 AKAP13 ATM CYTH1 NLRC5 DOCK2 GVINP1 AKNA DDX60L SORL1 SMG1 WIPF1 FAM65B SLC12A6 BIRC3 REL LRRK2 LYST RNF149 USP15 TLR1 GBP2 TRIM22 FAM129A KDM7A TRANK1 LYN IRF1 SP100 BACH1 TMEM154 MCL1 DOCK11 NAMPT MX2 TEP1 RASSF5 SLFN5 KIAA1551 IKZF1 ETS1 SAMD9 TLR8 FYB CDC42SE1 AC013264…	2.96939e-07	#440154	0.5	0	12	3.76367		135	7.90553	-0.22627	Cluster 0	Regulation Of Programmed Necrotic Cell Death (GO:0062098)	PRKN CYLD NUPR1 CFLAR SPATA2 PELI1 OGT ITCH BIRC2 BIRC3 CFLAR CYLD STK4 PELI1 PTPRC SMCHD1 OGT APOL6 DOCK8 PARP14 RNF213 SSH2 AKAP13 ATM CYTH1 NLRC5 DOCK2 GVINP1 AKNA DDX60L SORL1 SMG1 WIPF1 FAM65B SLC12A6 BIRC3 REL LRRK2 LYST RNF149 USP15 TLR1 GBP2 TRIM22 FAM129A KDM7A TRANK1 LYN IRF1 SP100 BACH1 TMEM154 MCL1 DOCK11 NAMPT MX2 TEP1 RASSF5 SLFN5 KIAA1551 IKZF1 ETS1 SAMD9 TLR8 FYB CDC42SE1 AC013264…	0.162797	#440154	0.5	0	5	0.894177
4295	10.2564	-1.4028	Cluster 10	Regulation Of MHC Class II Biosynthetic Process (GO:0045346)	IL10 XBP1 HDAC2 RFXANK SIRT1 IL4 RFX5 RFXAP IFNG TAF7 PF4 CIITA TMEM106A JAK2 TMEM106A CD274 JAK2 IL10 TRAF1 CIITA SLAMF7 CD40 GPR132 RFX5 IRF5 LILRB1 IL10RA STX11 RNF19B LILRB2 IL27 DHX58 PSTPIP2 LYN DOCK2 PIK3AP1 MX2 TSPAN33 RFXAP FGD2 NCKAP1L ACOD1 PARP14 IL1RN PLEKHO1 MYO1G ADGRE2 LGALS9 TNFAIP8 SLAMF1 TNF LILRB4 DAPP1 NFKB1 TBXAS1 ADORA2A SIGLEC1 BCL2A1 ICAM1 FERMT3 TFEC IFIH1 NINJ1 NFKB2 SO…	3.78905e-09	#aec7e8	0.5	0	12	4.71073		136	9.67276	-1.07799	Cluster 0	Regulation Of Podosome Assembly (GO:0071801)	GSN IL5 KIF9 CSF2 LCP1 FSCN1 TNF HCK HCK PILRA TNIP1 TNFRSF1B NCF2 SLC15A3 LILRB2 PIK3R5 OSCAR LCP1 TRAF1 VASP TLR2 MAN2B1 CD274 EHD1 PLEKHO2 ITGAX NFKB2 TNF NINJ1 PRKCD SIGLEC9 ARAP1 SPI1 RNF19B PPP1R18 MYO9B LILRB3 THEMIS2 LAPTM5 LITAF GNAI2 TNFAIP2 LYN RHOG SIRPA MGAT1 EMILIN2 STX11 AMPD3 TLR8 GPR84 TYMP BCL3 TCIRG1 CTSZ C5AR1 UNC93B1 SBNO2 GRAMD1A GRN SQRDL PLAUR ADORA2A IRF5 APOBR HCLS1 CCR5…	4.70103e-10	#440154	0.5	0	12	5.1639		136	9.67276	-1.07799	Cluster 0	Regulation Of Podosome Assembly (GO:0071801)	GSN IL5 KIF9 CSF2 LCP1 FSCN1 TNF HCK HCK PILRA TNIP1 TNFRSF1B NCF2 SLC15A3 LILRB2 PIK3R5 OSCAR LCP1 TRAF1 VASP TLR2 MAN2B1 CD274 EHD1 PLEKHO2 ITGAX NFKB2 TNF NINJ1 PRKCD SIGLEC9 ARAP1 SPI1 RNF19B PPP1R18 MYO9B LILRB3 THEMIS2 LAPTM5 LITAF GNAI2 TNFAIP2 LYN RHOG SIRPA MGAT1 EMILIN2 STX11 AMPD3 TLR8 GPR84 TYMP BCL3 TCIRG1 CTSZ C5AR1 UNC93B1 SBNO2 GRAMD1A GRN SQRDL PLAUR ADORA2A IRF5 APOBR HCLS1 CCR5…	0.189843	#440154	0.5	0	5	0.860802
4296	10.5209	-0.748729	Cluster 10	Response To Sterol (GO:0036314)	TGFB1 SMAD2 PMVK INSIG1 CCL3 RORC TGFBR1 RORA CCR5 TGFBR2 CCR5 NINJ1 TNFRSF1B PIK3R5 MMP19 TNIP1 CD68 CTSZ AMPD3 SLC15A3 CCL3 ICAM1 EHD1 PILRA INSIG1 SQRDL ADORA2A LILRB2 IL10RA TRAF1 LILRB4 PLAUR MAN2B1 CCL3L3 RAB7B BCL3 FCGRT RNF19B TNF SPHK1 CD4 GPR84 ZC3H12A MSC MGAT1 GRN EMILIN2 SIGLEC1 TGFB1 CEBPB NFKB2 CCRL2 PFKFB3 GBP2 SBNO2 TOM1 PLEKHO2 CCR1 OSCAR IRAK2 CTSB RELB SLC43A2 STAB1 PSAP MYO9B…	1.06968e-11	#aec7e8	0.5	0	12	5.98537		137	9.36295	-1.99588	Cluster 0	Cellular Response To Interferon-Beta (GO:0035458)	IFITM2 PNPT1 STAT1 NDUFA13 CAMK2A PYHIN1 HTRA2 UBE2G2 OAS1 IRGM IRF1 AIM2 CDC34 TRIM6 IFI16 MNDA IFNB1 UBE2K PYDC5 IFNAR1 IFNAR2 CALM1 MX2 OAS1 OAS2 TAP1 IRF1 GBP2 HCLS1 HLA.E APOBEC3A NCF2 NCF1B IFIT3 HCK MX1 TLR8 LILRB3 TRIM22 SMAP2 LYN EVI2B CSF2RB LITAF FPR1 NCF1 IFITM2 WAS MNDA CXCR1 HLA.B GLT1D1 SELPLG FFAR2 LCP1 FPR2 WIPF1 MYO1F GPSM3 CXCR2 STAT1 ARHGAP30 THEMIS2 IFIT2 CD53 TNFRSF10C ARHGA…	6.55473e-06	#440154	0.5	0	12	3.09172		137	9.36295	-1.99588	Cluster 0	Cellular Response To Interferon-Beta (GO:0035458)	IFITM2 PNPT1 STAT1 NDUFA13 CAMK2A PYHIN1 HTRA2 UBE2G2 OAS1 IRGM IRF1 AIM2 CDC34 TRIM6 IFI16 MNDA IFNB1 UBE2K PYDC5 IFNAR1 IFNAR2 CALM1 MX2 OAS1 OAS2 TAP1 IRF1 GBP2 HCLS1 HLA.E APOBEC3A NCF2 NCF1B IFIT3 HCK MX1 TLR8 LILRB3 TRIM22 SMAP2 LYN EVI2B CSF2RB LITAF FPR1 NCF1 IFITM2 WAS MNDA CXCR1 HLA.B GLT1D1 SELPLG FFAR2 LCP1 FPR2 WIPF1 MYO1F GPSM3 CXCR2 STAT1 ARHGAP30 THEMIS2 IFIT2 CD53 TNFRSF10C ARHGA…	1.02333e-06	#440154	0.5	0	12	3.49499
4297	10.5038	-0.717949	Cluster 10	Negative Regulation Of Response To Stimulus (GO:0048585)	PTPN1 SPINK5 TLE5 LYN BRAP AMBP APLP2 SIRT1 FOXP3 COL3A1 FCGR2B APOA1 SMCR8 PDCD1 EPHA4 MCTP1 CLU THY1 RTEL1 ALOX5 ERBB3 SLIT2 RPS3 UBASH3B SH2B3 SOCS5 MAP2K5 SRMS MPIG6B GGT7 WFS1 NR1H3 NR1H2 IGFBP3 VPS13C CASK HLA-G KLF4 ADRA2A KLF7 NLRP12 KIF26A DDAH1 LPCAT3 AQP11 HHIP WDR41 FCRLB INPP5D VHL PIM3 MAPK7 MYO9B ARAP1 MGAT1 TMEM127 ELF4 OGFR GNAI2 TLN1 SBNO2 AP5B1 STAT6 MAN2B1 LRP10 VASP RAPGEF1 E…	0.177997	#aec7e8	0.5	0	5	0.874793		138	8.68765	-1.58412	Cluster 0	Cellular Response To Interleukin-12 (GO:0071349)	STAT4 SIRPA P4HB IL12B IL12A IL12RB2 TYK2 IL12RB1 PLCB1 JAK2 SIRPA IL10RA TYK2 HCK TNFRSF1B ARAP1 FMNL1 MYO9B PIK3R5 HCLS1 TCIRG1 LILRB2 CYTH1 TLR8 MAN2B1 ARRB2 GRK2 LCP1 TAP1 ITGAX GBP2 THEMIS2 LYN PILRA STAT6 PTK2B ARHGAP30 PLCB2 HLA.E MYO1G CYTH4 SPI1 HLA.A LAPTM5 LILRB3 EHBP1L1 TNIP1 AOAH EFHD2 NCF2 APOBR PRKCD ELF4 TNFAIP2 IL17RA ADAM8 FGR SBNO2 PPP1R18 TGFB1 ADCY7 WAS OSCAR OGFR TLR2 SMAP2 …	2.8881e-05	#440154	0.5	0	12	2.76969		138	8.68765	-1.58412	Cluster 0	Cellular Response To Interleukin-12 (GO:0071349)	STAT4 SIRPA P4HB IL12B IL12A IL12RB2 TYK2 IL12RB1 PLCB1 JAK2 SIRPA IL10RA TYK2 HCK TNFRSF1B ARAP1 FMNL1 MYO9B PIK3R5 HCLS1 TCIRG1 LILRB2 CYTH1 TLR8 MAN2B1 ARRB2 GRK2 LCP1 TAP1 ITGAX GBP2 THEMIS2 LYN PILRA STAT6 PTK2B ARHGAP30 PLCB2 HLA.E MYO1G CYTH4 SPI1 HLA.A LAPTM5 LILRB3 EHBP1L1 TNIP1 AOAH EFHD2 NCF2 APOBR PRKCD ELF4 TNFAIP2 IL17RA ADAM8 FGR SBNO2 PPP1R18 TGFB1 ADCY7 WAS OSCAR OGFR TLR2 SMAP2 …	0.00785601	#440154	0.5	0	12	1.5524
4298	10.7188	-1.44768	Cluster 10	Regulation Of T-helper 1 Cell Cytokine Production (GO:2000554)	IL1B IL1R1 XCL1 TBX21 IL18R1 IL1R1 IL18R1 IL1B XCL1 TBX21 XCL2 NFKB1 IL4I1 TNF NFKBIA CXCL3 PTGS2 CXCL8 IRAK2 IL1A RNPEPL1 SERPINB2 TNFAIP8 ZC3H12A KIR2DL1 RP11.74D7.1 TRAF1 GPR84 SOCS3 TNIP3 NINJ1 RUNX3 LCP2 RAB29 PLAUR TNIP1 IL12RB2 ICAM1 OLR1 GBP2 PARP15 PFKFB3 TNFRSF1B EHD1 AMPD3 NFKB2 BFSP1 ADORA2A ITGAL TRIM21 RNF19B ACSL1 CCDC159 PIK3R5 LPXN TLR2 IER3 BCL3 LILRB2 CCRL2 MMP19 SQRDL SOD2 AC0…	2.47032e-05	#aec7e8	0.5	0	12	2.80362		139	8.26801	-2.10563	Cluster 0	Cellular Response To Interleukin-15 (GO:0071350)	IL15RA IL15 STAT3 IL2RB MFAP3 IL2RG JAK3 JAK1 STAT5A PLCB1 JAK3 RASSF5 TAP1 LCP2 STAT5A GBP2 CYTH1 HLA.E NLRC5 HCLS1 IL10RA IL2RG JAK1 HLA.A TNFRSF1B WIPF1 CD53 LCP1 RASAL3 STAT3 RUNX3 IRF1 AKNA FMNL1 MYO1G PTPRC PRKCH CYTH4 PIK3R5 HLA.B PIK3CD ARHGAP45 CORO1A GPSM3 ARHGAP30 IL15RA MX2 SMAP2 IKZF1 LILRB2 TRAF1 CDC42SE1 ARHGAP25 IL2RB RAC2 ISG20 RIN3 IL16 ARHGEF1 LAPTM5 DOCK8 ADGRE5 LSP1 TMC8 WAS …	1.01408e-05	#440154	0.5	0	12	2.99696		139	8.26801	-2.10563	Cluster 0	Cellular Response To Interleukin-15 (GO:0071350)	IL15RA IL15 STAT3 IL2RB MFAP3 IL2RG JAK3 JAK1 STAT5A PLCB1 JAK3 RASSF5 TAP1 LCP2 STAT5A GBP2 CYTH1 HLA.E NLRC5 HCLS1 IL10RA IL2RG JAK1 HLA.A TNFRSF1B WIPF1 CD53 LCP1 RASAL3 STAT3 RUNX3 IRF1 AKNA FMNL1 MYO1G PTPRC PRKCH CYTH4 PIK3R5 HLA.B PIK3CD ARHGAP45 CORO1A GPSM3 ARHGAP30 IL15RA MX2 SMAP2 IKZF1 LILRB2 TRAF1 CDC42SE1 ARHGAP25 IL2RB RAC2 ISG20 RIN3 IL16 ARHGEF1 LAPTM5 DOCK8 ADGRE5 LSP1 TMC8 WAS …	0.0245486	#440154	0.5	0	12	1.30499
4299	10.8304	-0.582129	Cluster 10	Regulation Of Smooth Muscle Cell Proliferation (GO:0048660)	TGFB1 EDN1 PDGFRB IL18 EREG FOXP1 BMP4 BMP2 IL6 OGN IFNG ID2 VIP BMPR2 NDRG4 ELN TNFAIP3 TNF CX3CL1 MFN2 AKT1 CCN4 PPARGC1A HES5 ELANE TCF7L2 STAT1 XRCC5 PTGIR IGFBP5 XRCC6 SERPINF2 IGFBP3 IGF1 NR4A3 CDH13 PPARG ANG NOX1 TRIB1 PHB1 HDAC1 CTNNB1 PDGFB THBS1 PRKDC CCL5 HMOX1 APOE IL12B IL12A IL6R APOD RBPMS2 LAMP1 SPSB1 TRIP10 MAPKAPK2 PXDC1 LRP1 NUCB1 LAMB2 ARHGAP31 PDGFB PFKFB3 TNIP1 SNX9 ICAM1 I…	0.000846386	#aec7e8	0.5	0	12	2.03622		140	8.16953	-2.13817	Cluster 0	Cellular Response To Interleukin-2 (GO:0071352)	IL2RA STAT3 IL2RB IL2RG JAK3 JAK1 STAT5A JAK3 RASSF5 IL2RG HCLS1 TAP1 HLA.E RASAL3 NLRC5 CYTH1 HLA.A GBP2 LCP2 STAT5A WIPF1 AKNA CD53 CORO1A PIK3CD LCP1 RAC2 JAK1 IKZF1 CD3E IL2RB PTPRC RUNX3 FMNL1 ARHGAP45 STAT3 ARHGAP30 PRKCH HLA.B ARHGEF1 IL16 MYO1G GPSM3 TMC8 CDC42SE1 PTPN6 LSP1 ADGRE5 TMC6 CD247 DOCK8 ARHGAP25 SMAP2 RIN3 ITGAL IL10RA ZAP70 SELPLG WAS TNFRSF1B CYTIP PSD4 IL2RA IRF1 STAT6 CYTH…	0.00260723	#440154	0.5	0	12	1.79191		140	8.16953	-2.13817	Cluster 0	Cellular Response To Interleukin-2 (GO:0071352)	IL2RA STAT3 IL2RB IL2RG JAK3 JAK1 STAT5A JAK3 RASSF5 IL2RG HCLS1 TAP1 HLA.E RASAL3 NLRC5 CYTH1 HLA.A GBP2 LCP2 STAT5A WIPF1 AKNA CD53 CORO1A PIK3CD LCP1 RAC2 JAK1 IKZF1 CD3E IL2RB PTPRC RUNX3 FMNL1 ARHGAP45 STAT3 ARHGAP30 PRKCH HLA.B ARHGEF1 IL16 MYO1G GPSM3 TMC8 CDC42SE1 PTPN6 LSP1 ADGRE5 TMC6 CD247 DOCK8 ARHGAP25 SMAP2 RIN3 ITGAL IL10RA ZAP70 SELPLG WAS TNFRSF1B CYTIP PSD4 IL2RA IRF1 STAT6 CYTH…	0.0897741	#440154	0.5	0	5	1.02342
4300	10.5999	-1.11408	Cluster 10	Negative Regulation Of Receptor Signaling Pathway Via STAT (GO:1904893)	GBP7 PTPN2 PTPRT CLEC12B CAV1 SOCS3 HGS SOCS1 BCL3 VHL NF2 PPARG LEPROT SH2B3 BCL3 SOCS3 EHD1 RNF19B TNIP1 ICAM1 ZC3H12A SBNO2 TNFAIP2 LILRB2 PLAUR NINJ1 PFKFB3 NFKB2 IL1RN SOCS1 TNFRSF1B RELB SLAMF7 TICAM1 MMP19 SPHK1 IL27 TRAF1 AMPD3 SQRDL DHX58 STX11 CEBPB TRIM25 GRAMD1A PIM3 HELZ2 SPSB1 MGAT1 CD274 ADORA2A OGFR PILRA NFKB1 GPR84 SIGLEC1 ACOD1 LILRB4 MSC IL10 IER3 TYMP GRN CD68 MAPKAPK2 SLC2A6…	1.3484e-06	#aec7e8	0.5	0	12	3.43509		141	8.10319	-2.05118	Cluster 0	Cellular Response To Interleukin-4 (GO:0071353)	LEF1 IL4R XBP1 XCL1 SHPK GATA3 IL4 RUFY4 TCF7 STAT6 JAK3 JAK1 STAT5A ARHGAP45 ARHGEF1 CYTH1 STAT6 IKZF1 NLRC5 AKNA JAK3 FMNL1 ARHGAP30 HCLS1 RASSF5 TMC8 GRK2 SUN2 CSK PIK3CD TCF7 ARHGAP4 CORO1A IL4R HLA.E RASAL3 TMC6 WIPF1 RASGRP2 ATP2A3 CDC42SE1 GPSM3 WAS GMIP ETS1 HLA.B PSD4 NBEAL2 HLA.A LRCH4 SMAP2 LCP1 DENND1C PLCB2 RIN3 CCDC88B ARAP1 GRK6 DOCK8 ADCY7 ARHGAP27 DOCK2 FGD3 ADGRE5 TAP1 PTPN6 CAR…	0.173754	#440154	0.5	0	5	0.880033		141	8.10319	-2.05118	Cluster 0	Cellular Response To Interleukin-4 (GO:0071353)	LEF1 IL4R XBP1 XCL1 SHPK GATA3 IL4 RUFY4 TCF7 STAT6 JAK3 JAK1 STAT5A ARHGAP45 ARHGEF1 CYTH1 STAT6 IKZF1 NLRC5 AKNA JAK3 FMNL1 ARHGAP30 HCLS1 RASSF5 TMC8 GRK2 SUN2 CSK PIK3CD TCF7 ARHGAP4 CORO1A IL4R HLA.E RASAL3 TMC6 WIPF1 RASGRP2 ATP2A3 CDC42SE1 GPSM3 WAS GMIP ETS1 HLA.B PSD4 NBEAL2 HLA.A LRCH4 SMAP2 LCP1 DENND1C PLCB2 RIN3 CCDC88B ARAP1 GRK6 DOCK8 ADCY7 ARHGAP27 DOCK2 FGD3 ADGRE5 TAP1 PTPN6 CAR…	0.171587	#440154	0.5	0	5	0.882757
4301	10.3167	-0.777329	Cluster 10	Regulation Of I-kappaB Phosphorylation (GO:1903719)	DDRGK1 CX3CR1 SIRPA TNF PLCG2 CX3CL1 SIRPA TNF PLEKHM2 TNIP1 PFKFB3 DDRGK1 SLC15A3 OGFR ICAM1 NINJ1 TNFRSF1B MAN2B1 EHD1 AMPD3 SBNO2 PILRA ZC3H12A CTSZ GAA RNF19B LILRB2 MYO9B TNFAIP2 ARHGEF11 ABR CSF1R PIK3R5 CCR5 CD68 HCK ARAP1 GPR84 PSAP GRN SRC MGAT1 C1QC PLAUR TOM1 MMP19 BCL3 TLR2 CEBPB EMILIN2 CX3CL1 CX3CR1 FCGRT GRAMD1A NFKB2 SPHK1 TRPM2 LILRB4 OSCAR TRAF1 SIGLEC9 UNC93B1 PLEKHO2 TYMP IER3…	3.05297e-11	#aec7e8	0.5	0	12	5.75764		142	9.24773	-0.799495	Cluster 0	Cellular Response To Interleukin-6 (GO:0071354)	PID1 ST18 YAP1 RELA SELPLG SRC PTGIS SPI1 PTPRT SMAD4 PHB1 STAT3 CTR9 NFKB1 SBNO2 IL6 FER ST3GAL6 IL6ST IL6R JAK1 TDGF1 JAK2 HCK SBNO2 PIK3R5 LILRB2 TNFRSF1B TLR2 PILRA NCF2 ARAP1 LILRB3 TLR8 IL6R SPI1 BCL3 ITGAX OSCAR TNIP1 RNF19B LITAF TNFAIP2 VASP SIGLEC9 LYN ACSL1 PLEKHO2 NFKB1 MYO9B SIRPA THEMIS2 AQP9 NFKB2 C5AR1 NINJ1 PPP1R18 STX11 SLC43A2 ADGRE2 APOBR FMNL1 TYMP CSF2RB NOD2 CEBPB MGAT1 EHD…	3.67441e-10	#440154	0.5	0	12	5.21741		142	9.24773	-0.799495	Cluster 0	Cellular Response To Interleukin-6 (GO:0071354)	PID1 ST18 YAP1 RELA SELPLG SRC PTGIS SPI1 PTPRT SMAD4 PHB1 STAT3 CTR9 NFKB1 SBNO2 IL6 FER ST3GAL6 IL6ST IL6R JAK1 TDGF1 JAK2 HCK SBNO2 PIK3R5 LILRB2 TNFRSF1B TLR2 PILRA NCF2 ARAP1 LILRB3 TLR8 IL6R SPI1 BCL3 ITGAX OSCAR TNIP1 RNF19B LITAF TNFAIP2 VASP SIGLEC9 LYN ACSL1 PLEKHO2 NFKB1 MYO9B SIRPA THEMIS2 AQP9 NFKB2 C5AR1 NINJ1 PPP1R18 STX11 SLC43A2 ADGRE2 APOBR FMNL1 TYMP CSF2RB NOD2 CEBPB MGAT1 EHD…	0.3909	#440154	0.5	0	5	0.703967
4302	10.6917	-1.27312	Cluster 10	Negative Regulation Of Receptor Signaling Pathway Via JAK-STAT (GO:0046426)	GBP7 PTPN2 CAV1 OCRL PPP2R1A PPP2CA PARP14 SOCS3 HGS SOCS1 BCL3 VHL NF2 PIBF1 LEPROT SH2B3 BCL3 SOCS3 EHD1 ICAM1 TNIP1 RNF19B ZC3H12A NFKB2 SOCS1 SLAMF7 SBNO2 IL1RN PFKFB3 IL27 TRAF1 PLAUR CD274 SPHK1 TICAM1 TNFAIP2 HELZ2 DHX58 NINJ1 RELB MMP19 TRIM25 PTPN1 ACOD1 CD40 GRAMD1A PIM3 LILRB2 OASL SQRDL MSC NFKB1 OGFR TRIP10 AMPD3 SIGLEC1 MAPKAPK2 IER3 NIPAL4 SLC2A6 TNF SPSB1 ADORA2A IL10 CLCF1 SOD2 M…	1.93832e-05	#aec7e8	0.5	0	12	2.85629		143	8.22229	-1.87559	Cluster 0	Cellular Response To Interleukin-9 (GO:0071355)	STAT1 STAT3 IL9R JAK3 JAK1 STAT5A JAK3 STAT5A STAT3 TAP1 NLRC5 JAK1 CYTH1 WIPF1 STAT1 RASSF5 HCLS1 HLA.A HLA.E MYO1G LCP1 STAT6 FMNL1 IKZF1 DOCK8 ARHGAP30 GBP2 ARHGAP45 AKNA PIK3CD HLA.B DOCK2 CORO1A ARHGEF1 SMAP2 STAT5B RASAL3 LCP2 PTPRC OAS2 SUN2 RNF213 KLF13 IRF1 ELF4 NCKAP1L GRK2 ARAP1 SBNO2 LYN UNC13D PARP10 ADGRE5 TMC8 GMIP GPSM3 WAS RIN3 CSK MYO9B ETS1 PTPN6 NBEAL2 CDC42SE1 PARP14 PSD4 LAP…	0.000321955	#440154	0.5	0	12	2.2461		143	8.22229	-1.87559	Cluster 0	Cellular Response To Interleukin-9 (GO:0071355)	STAT1 STAT3 IL9R JAK3 JAK1 STAT5A JAK3 STAT5A STAT3 TAP1 NLRC5 JAK1 CYTH1 WIPF1 STAT1 RASSF5 HCLS1 HLA.A HLA.E MYO1G LCP1 STAT6 FMNL1 IKZF1 DOCK8 ARHGAP30 GBP2 ARHGAP45 AKNA PIK3CD HLA.B DOCK2 CORO1A ARHGEF1 SMAP2 STAT5B RASAL3 LCP2 PTPRC OAS2 SUN2 RNF213 KLF13 IRF1 ELF4 NCKAP1L GRK2 ARAP1 SBNO2 LYN UNC13D PARP10 ADGRE5 TMC8 GMIP GPSM3 WAS RIN3 CSK MYO9B ETS1 PTPN6 NBEAL2 CDC42SE1 PARP14 PSD4 LAP…	0.00636131	#440154	0.5	0	12	1.59823
4303	10.5014	-0.460808	Cluster 10	Negative Regulation Of Lipid Storage (GO:0010888)	CES1 CRP PTPN2 OSBPL8 PPARA ABHD5 NR1H3 NR1H2 ITGB3 TNF TREM2 TTC39B NFKBIA IL6 PPARG ABCG1 ITGAV PNPLA2 SLC15A3 CD68 LILRB4 NINJ1 CTSZ PLAUR ICAM1 SQRDL ZC3H12A ACSL1 AMPD3 MMP19 CCRL2 TNIP1 CCR5 PFKFB3 NR1H3 CEBPB EMILIN2 GPR84 FCGRT RNF19B EHD1 TNF CREG1 RAB7B ACP5 NPL BCL3 GRN SPSB1 PILRA MAN2B1 GM2A MGAT1 TOM1 IL1RN SIGLEC1 LACTB SPHK1 FTL SOD2 PSAP IER3 TMBIM1 CTSB PIK3R5 IFI30 SOCS3 MSC TN…	6.24395e-15	#aec7e8	0.5	0	12	7.60227		144	8.23474	-1.32352	Cluster 0	Cellular Response To Lectin (GO:1990858)	CREBBP LYN SRC KLRC3 SYK KLRC4 TYROBP IKBKB PAK2 PAK1 CLEC7A EP300 TRAF6 KLRD1 KLRC2 PLCG2 FYN MAP3K7 PAK3 AOAH PTPRC LYN NCF2 DOCK8 CTSS ITGAX TLR8 HCK HCLS1 WIPF1 FMNL1 THEMIS2 DOCK2 TLR2 LCP1 MYO1F ARRB2 EVI2B ARHGAP30 IL17RA ARAP1 FGR CLEC7A HLA.E SSH2 PIK3R5 AKNA MPEG1 LAPTM5 ARHGAP25 TNFRSF1B FAM65B CYTH4 CSF2RB RASSF2 CDC42SE1 PLCB2 ADGRE2 WAS LILRB3 SMAP2 GMIP CYTH1 RASSF5 SIGLEC9 TLR1 LR…	2.70049e-10	#440154	0.5	0	12	5.28428		144	8.23474	-1.32352	Cluster 0	Cellular Response To Lectin (GO:1990858)	CREBBP LYN SRC KLRC3 SYK KLRC4 TYROBP IKBKB PAK2 PAK1 CLEC7A EP300 TRAF6 KLRD1 KLRC2 PLCG2 FYN MAP3K7 PAK3 AOAH PTPRC LYN NCF2 DOCK8 CTSS ITGAX TLR8 HCK HCLS1 WIPF1 FMNL1 THEMIS2 DOCK2 TLR2 LCP1 MYO1F ARRB2 EVI2B ARHGAP30 IL17RA ARAP1 FGR CLEC7A HLA.E SSH2 PIK3R5 AKNA MPEG1 LAPTM5 ARHGAP25 TNFRSF1B FAM65B CYTH4 CSF2RB RASSF2 CDC42SE1 PLCB2 ADGRE2 WAS LILRB3 SMAP2 GMIP CYTH1 RASSF5 SIGLEC9 TLR1 LR…	0.429621	#440154	0.5	0	5	0.683457
4304	10.8278	-1.17157	Cluster 10	Negative Regulation Of Lipid Localization (GO:1905953)	NFKBIA PTPN2 IL6 NR1H3 NR1H2 ITGB3 PPARG TNF ITGAV TNF ICAM1 ZC3H12A PLAUR MMP19 IER3 TNIP1 EHD1 GPR84 IL6 CXCL3 NINJ1 AMPD3 MSC PFKFB3 LILRB4 TRAF1 CCRL2 SPHK1 NFKBIA IL1RN CCR5 IL1B SLAMF7 RNF19B IRAK2 CD68 SLC15A3 SQRDL ADORA2A SOCS3 CTSZ IL27 IL10 CD274 NFKB2 BCL3 SLC2A6 SRC NR1H3 NFKB1 RAB7B CD40 SPSB1 NIPAL4 PIM3 PTGS2 RELB TICAM1 ACOD1 CEBPB DRAM1 SERPINB2 IL15RA CCL3L3 TNFAIP2 SOD2 EMILIN…	4.66206e-11	#aec7e8	0.5	0	12	5.66571		145	8.66035	-0.9087	Cluster 0	Regulation Of Phagocytosis (GO:0050764)	TUB IL15 SFTPD SPHK1 APOA2 AZU1 MERTK TLR2 IL1B PTPRC FCGR2B OLFM4 APOA1 IFNG SPACA3 CALR GAS6 DOCK2 LETMD1 FPR2 TNF IL2RG TREM2 SIRPB1 PYCARD SNX3 CLEC7A FCER1G LYAR ADIPOQ IL15RA CAMK1D AHSG SYK SLC11A1 RAB27A CYBA HCK SYT7 FGR PLSCR1 SYT11 IL2RB PRTN3 CD47 SIRPG DYSF PLA2G5 TULP1 GATA2 TGM2 LMAN2 PIP4P2 SIRPA ITGAV RACK1 SCARB1 MBL2 HCK NCF2 TLR2 SPI1 PILRA SIGLEC9 ITGAX LILRB2 TNFRSF1B LILRB3…	3.38354e-07	#440154	0.5	0	12	3.73531		145	8.66035	-0.9087	Cluster 0	Regulation Of Phagocytosis (GO:0050764)	TUB IL15 SFTPD SPHK1 APOA2 AZU1 MERTK TLR2 IL1B PTPRC FCGR2B OLFM4 APOA1 IFNG SPACA3 CALR GAS6 DOCK2 LETMD1 FPR2 TNF IL2RG TREM2 SIRPB1 PYCARD SNX3 CLEC7A FCER1G LYAR ADIPOQ IL15RA CAMK1D AHSG SYK SLC11A1 RAB27A CYBA HCK SYT7 FGR PLSCR1 SYT11 IL2RB PRTN3 CD47 SIRPG DYSF PLA2G5 TULP1 GATA2 TGM2 LMAN2 PIP4P2 SIRPA ITGAV RACK1 SCARB1 MBL2 HCK NCF2 TLR2 SPI1 PILRA SIGLEC9 ITGAX LILRB2 TNFRSF1B LILRB3…	0.0070769	#440154	0.5	0	12	1.57508
4305	10.5676	-1.28001	Cluster 10	Regulation Of Protein Deubiquitination (GO:0090085)	ZC3H12A TNIP1 TRIM21 TANK OTUD4 TNIP1 ZC3H12A NFKB2 TRAF1 RNF19B ICAM1 EHD1 NFKB1 BCL3 TNFAIP2 NINJ1 SLAMF7 RELB TRIM21 SQRDL AMPD3 ADORA2A CD274 TNFRSF1B TNF IL1RN PLAUR LILRB2 MSC GPR84 CD40 DHX58 PIK3R5 TICAM1 PFKFB3 CCR5 GBP2 SOD2 MMP19 IRAK2 PILRA CCRL2 NFKBIE SOCS3 SLAMF1 SBNO2 OASL PIM3 IL27 GPR132 IER3 SLC15A3 HELZ2 TAP1 SOCS1 TRIM25 LITAF LILRB4 IFIH1 DUSP5 GRAMD1A SLC2A6 HCK STX11 ACOD1…	1.11068e-08	#aec7e8	0.5	0	12	4.47721		146	8.77797	-2.52856	Cluster 0	Positive Regulation Of T Cell Mediated Immunity (GO:0002711)	FZD5 XCL1 HLA-C FBXO38 HLA-A TRAF2 HLA-B HLA-G CYRIB HLA-E HLA-F RAET1E IL1B RAET1G IL23A TNFSF4 TRAF6 HLA-DRA ULBP1 ULBP3 ZP3 ULBP2 HLA-DRB3 HLA-DRB1 IL23R HFE ZBTB1 CD1E HSPD1 CD1D CD1C CD1B MALT1 CD1A STX7 FADD IL12B IL12A MAP3K7 IL12RB1 MICA MICB CD55 CD1B CD1E CD1A CCL17 CLEC10A CD1C MICB LIPA RUFY4 MMP12 WDFY4 ITGAM IL23A NFKB1 LCP1 ADCY7 FGD2 CD55 ESPNL CMTM6 ULBP2 IL12B ITGAX ZBTB1 IL10RA…	2.07875e-09	#440154	0.5	0	12	4.8411		146	8.77797	-2.52856	Cluster 0	Positive Regulation Of T Cell Mediated Immunity (GO:0002711)	FZD5 XCL1 HLA-C FBXO38 HLA-A TRAF2 HLA-B HLA-G CYRIB HLA-E HLA-F RAET1E IL1B RAET1G IL23A TNFSF4 TRAF6 HLA-DRA ULBP1 ULBP3 ZP3 ULBP2 HLA-DRB3 HLA-DRB1 IL23R HFE ZBTB1 CD1E HSPD1 CD1D CD1C CD1B MALT1 CD1A STX7 FADD IL12B IL12A MAP3K7 IL12RB1 MICA MICB CD55 CD1B CD1E CD1A CCL17 CLEC10A CD1C MICB LIPA RUFY4 MMP12 WDFY4 ITGAM IL23A NFKB1 LCP1 ADCY7 FGD2 CD55 ESPNL CMTM6 ULBP2 IL12B ITGAX ZBTB1 IL10RA…	0.289776	#440154	0.5	0	5	0.768969
4306	10.7839	-1.10935	Cluster 10	Positive Regulation Of Neuroinflammatory Response (GO:0150078)	IL33 IL1B UXT TTBK1 IL6 MMP8 NUPR1 TAFA3 TNF PLCG2 IL18 TREM2 TNF IL1B GPR84 PLAUR IL6 CXCL3 ICAM1 AMPD3 ZC3H12A PFKFB3 MMP19 CCRL2 SERPINB2 IER3 LILRB4 PTGS2 TRAF1 RAB7B IRAK2 IL10 IL1RN IL27 SOCS3 CD68 SLAMF7 SOD2 CXCL8 MSC RNF19B SLC15A3 CCR5 NINJ1 SPHK1 EHD1 SQRDL ADORA2A CCL3L3 ACOD1 TNIP1 NFKB1 NIPAL4 SLC2A6 C1QC SIGLEC1 KMO TREM2 CD274 TNIP3 IL1A FTL C1QA CXCL2 CTSZ EMILIN2 VSIG4 OASL SRC …	1.94958e-10	#aec7e8	0.5	0	12	5.35503		147	8.16734	-0.721575	Cluster 0	Cellular Response To Lipoteichoic Acid (GO:0071223)	TLR2 RELA TIRAP EHHADH MAPK14 TLR2 MAPK14 TLR8 CYP4F3 AQP9 NCF2 ACSL1 HCK FPR2 IL17RA LYN TIRAP P2RY13 TLR1 IL6R VNN2 LILRB3 FPR1 ITGAX GLT1D1 CSF2RB MXD1 MYO1F EVI2B SIGLEC9 NADK RELA CTSS CLEC4E MNDA NFAM1 LILRA6 GCA RNF149 TLR4 CLEC7A THEMIS2 LRRC25 TNFRSF10C C5AR1 C10ORF54 PROK2 ARRB2 SIGLEC5 SIRPB1 SPI1 TREM1 SMAP2 CHST15 APOBR CPPED1 FGR EHHADH CXCR2 CXCR1 ARAP1 ADGRE2 CEACAM3 PILRA PTAFR F…	1.77381e-08	#440154	0.5	0	12	4.37555		147	8.16734	-0.721575	Cluster 0	Cellular Response To Lipoteichoic Acid (GO:0071223)	TLR2 RELA TIRAP EHHADH MAPK14 TLR2 MAPK14 TLR8 CYP4F3 AQP9 NCF2 ACSL1 HCK FPR2 IL17RA LYN TIRAP P2RY13 TLR1 IL6R VNN2 LILRB3 FPR1 ITGAX GLT1D1 CSF2RB MXD1 MYO1F EVI2B SIGLEC9 NADK RELA CTSS CLEC4E MNDA NFAM1 LILRA6 GCA RNF149 TLR4 CLEC7A THEMIS2 LRRC25 TNFRSF10C C5AR1 C10ORF54 PROK2 ARRB2 SIGLEC5 SIRPB1 SPI1 TREM1 SMAP2 CHST15 APOBR CPPED1 FGR EHHADH CXCR2 CXCR1 ARAP1 ADGRE2 CEACAM3 PILRA PTAFR F…	0.101995	#440154	0.5	0	5	0.995711
4307	10.9411	-1.03813	Cluster 10	Hyaluronan Biosynthetic Process (GO:0030213)	IL1B CEMIP HYAL1 HAS2 HAS1 HAS3 HAS1 IL1B CEMIP HAS2 HAS3 HYAL1 IL6 PTGS2 CXCL3 IL1A IER3 SERPINB2 SOCS3 PTX3 DRAM1 SRC SPHK1 IRAK2 PLAUR TNF ZC3H12A CXCL8 ICAM1 PFKFB3 ADM MMP19 ATP13A3 GPR84 TRIP10 SPSB1 IL1RN SNX9 EHD1 PXDC1 LRP1 WNT5A TNIP1 IL27 DSE CLCF1 OLR1 NFKB1 ACOD1 IL1R1 RNF19B ABTB2 OSMR C1R MMP14 NIPAL4 IGFBP4 C1S MSC EFEMP2 TRAF1 SOD2 IL10 BCL3 CSF3 SLC2A6 THBS1 EMP1 FN1 PDCD1LG2 AC…	1.93832e-05	#aec7e8	0.5	0	12	2.85629		148	7.8149	-1.8865	Cluster 0	Cellular Response To Granulocyte Macrophage Colony-Stimulating Factor Stimulus (GO:0097011)	ZFP36 CSF2 NPR2 PDE1B ZFP36L2 ZFP36 ZFP36L2 PDE1B CSF2 NPR2 IFNG JUNB TSC22D3 TNFAIP3 PER1 PPP1R15A CSRNP1 PNRC1 CXCR4 FOS KLF6 DUSP1 NFKBIA PTGER4 RASAL3 GIT2 TMC8 CALCOCO1 BTG1 JUND RIN3 PIK3IP1 ARID5A LIMD2 RASSF5 KLF2 TMEM173 ARHGAP4 KCNAB2 SPOCK2 RNF166 TSPAN32 PBXIP1 NLRP1 SNRPCP4 TNFRSF25 DPP7 UBA7 SUN2 FOSB DGKZ ARHGEF1 RAC2 TBC1D10C PTPRCAP ACTBP6 CYTH1 NFKBIZ TSPYL2 AES JAK3 ACAP1 DEF6 …	0.00865028	#440154	0.5	0	12	1.53148		148	7.8149	-1.8865	Cluster 0	Cellular Response To Granulocyte Macrophage Colony-Stimulating Factor Stimulus (GO:0097011)	ZFP36 CSF2 NPR2 PDE1B ZFP36L2 ZFP36 ZFP36L2 PDE1B CSF2 NPR2 IFNG JUNB TSC22D3 TNFAIP3 PER1 PPP1R15A CSRNP1 PNRC1 CXCR4 FOS KLF6 DUSP1 NFKBIA PTGER4 RASAL3 GIT2 TMC8 CALCOCO1 BTG1 JUND RIN3 PIK3IP1 ARID5A LIMD2 RASSF5 KLF2 TMEM173 ARHGAP4 KCNAB2 SPOCK2 RNF166 TSPAN32 PBXIP1 NLRP1 SNRPCP4 TNFRSF25 DPP7 UBA7 SUN2 FOSB DGKZ ARHGEF1 RAC2 TBC1D10C PTPRCAP ACTBP6 CYTH1 NFKBIZ TSPYL2 AES JAK3 ACAP1 DEF6 …	0.980915	#440154	0.5	0	5	0.504184
4308	10.5996	-0.95369	Cluster 10	Negative Regulation Of Protein-Containing Complex Disassembly (GO:0043242)	HDAC6 RUBCN SLN IRAK3 PHF23 TMEM39A TNF UBQLN4 TNF MAPKAPK2 TNIP1 NFKB2 RUBCN RNF19B EHBP1L1 UBQLN4 PHF23 TRIP10 GRAMD1A ELL TRAF1 HDAC6 STK40 EHD1 PFKFB3 ZC3H12A LILRB2 TNFAIP2 MYO9B PLEKHM2 TMEM39A PIM3 SLN RAPGEF1 OGFR ZNF710 SBNO2 TNFRSF1B ARHGEF2 ADORA2A FHL3 TICAM1 STX11 ICAM1 WI2.1896O14.1 NFKB1 RAB35 SMTNL1 IRAK3 TRIM25 MYOZ1 AMPD3 GPR84 TOM1 CASQ1 ACSL1 IL1B BCL3 TMOD4 STAC3 RELB FBRS PI…	1.17414e-05	#aec7e8	0.5	0	12	2.96514		149	9.63891	-2.35564	Cluster 0	Regulation Of Peptidyl-Serine Phosphorylation Of STAT Protein (GO:0033139)	IFNA6 IFNA5 IFNA14 IFNA8 IFNA7 IFNA2 IFNA16 IFNA1 IFNA17 IFNA4 LIF IFNW1 IFNE IFNG IFNB1 IFNK IFNA21 IFNA10 IFNA1 IFNB1 IFNW1 IFNE MX1 LIF IFNK IFNG OAS2 OAS3 STAT1 CSF2 IFIT2 CCR7 IFIT3 CXCL10 DHX58 CXCL11 CD274 RSAD2 DUSP5 EPSTI1 USP18 SAMD9 CMPK2 MX2 IRF7 NFKB1 OASL IFIT1 TNFSF10 OAS1 IFIH1 HERC6 SAMD9L PNOC IFI35 HELZ2 SNRPCP4 PTTG4P IER3 IMPDH1P10 CD38 PI4K2B RNF19B DDX60L ZC3H12A TRIM22 ABT…	0.00134065	#440154	0.5	0	12	1.93634		149	9.63891	-2.35564	Cluster 0	Regulation Of Peptidyl-Serine Phosphorylation Of STAT Protein (GO:0033139)	IFNA6 IFNA5 IFNA14 IFNA8 IFNA7 IFNA2 IFNA16 IFNA1 IFNA17 IFNA4 LIF IFNW1 IFNE IFNG IFNB1 IFNK IFNA21 IFNA10 IFNA1 IFNB1 IFNW1 IFNE MX1 LIF IFNK IFNG OAS2 OAS3 STAT1 CSF2 IFIT2 CCR7 IFIT3 CXCL10 DHX58 CXCL11 CD274 RSAD2 DUSP5 EPSTI1 USP18 SAMD9 CMPK2 MX2 IRF7 NFKB1 OASL IFIT1 TNFSF10 OAS1 IFIH1 HERC6 SAMD9L PNOC IFI35 HELZ2 SNRPCP4 PTTG4P IER3 IMPDH1P10 CD38 PI4K2B RNF19B DDX60L ZC3H12A TRIM22 ABT…	8.2329e-07	#440154	0.5	0	12	3.54222
4309	10.8589	-1.00648	Cluster 10	Regulation Of Vascular Endothelial Growth Factor Production (GO:0010574)	TGFB1 CCR2 CCBE1 EIF2AK3 SULF2 ISL1 SULF1 IL1A IL1B SARS1 IL6 HPSE IL6ST NOX1 NODAL ATF4 FLT4 BRCA1 GATA4 HIF1A RORA PTGS2 CXCL17 C3 C5 CYP1B1 IL1B PTGS2 IL1A IL6 ZC3H12A IER3 CXCL8 IRAK2 CXCL3 NFKB1 ATP13A3 FOSL2 TNIP1 PFKFB3 RNF19B PLAUR ICAM1 SRC TNF SERPINB2 BCL3 CEBPB SOCS3 GPR84 NFKB2 SBNO2 FNDC3B MAPKAPK2 IL6ST DRAM1 EHD1 ADORA2A CYP1B1 SPSB1 AC013444.1 AMPD3 TRIM25 SOD2 NINJ1 LAMP1 ARHGAP…	1.51276e-05	#aec7e8	0.5	0	12	2.91012		150	7.93564	-1.48298	Cluster 0	Positive Regulation Of Ras Protein Signal Transduction (GO:0046579)	GPR17 GPR18 GPR55 MMD2 COL3A1 PIK3CB LPAR6 SYNPO2L APOA1 ARHGEF3 EPO RTN4R RASGRF1 PRAG1 GPR20 GPR65 P2RY8 RASGEF1A MCF2L SHOC2 NTRK1 GPR35 F2R AUTS2 IGF1 GPR4 NGF P2RY10 ALS2 FGF10 F2RL1 F2RL2 MAPRE2 F2RL3 NOTCH1 NOTCH2 STK19 LPAR4 F11R SLC6A2 ROBO1 LPAR1 RASGRP4 PIK3CG AKAP13 GPR174 RASGRP1 ARRB1 RAC1 ADGRG1 MAP4K4 WIPF1 RASSF2 AKAP13 SSH2 SLC12A6 DOCK8 PTPRC HLA.E KIAA0430 SORL1 AKNA FAM65B IQ…	0.0013683	#440154	0.5	0	12	1.93191		150	7.93564	-1.48298	Cluster 0	Positive Regulation Of Ras Protein Signal Transduction (GO:0046579)	GPR17 GPR18 GPR55 MMD2 COL3A1 PIK3CB LPAR6 SYNPO2L APOA1 ARHGEF3 EPO RTN4R RASGRF1 PRAG1 GPR20 GPR65 P2RY8 RASGEF1A MCF2L SHOC2 NTRK1 GPR35 F2R AUTS2 IGF1 GPR4 NGF P2RY10 ALS2 FGF10 F2RL1 F2RL2 MAPRE2 F2RL3 NOTCH1 NOTCH2 STK19 LPAR4 F11R SLC6A2 ROBO1 LPAR1 RASGRP4 PIK3CG AKAP13 GPR174 RASGRP1 ARRB1 RAC1 ADGRG1 MAP4K4 WIPF1 RASSF2 AKAP13 SSH2 SLC12A6 DOCK8 PTPRC HLA.E KIAA0430 SORL1 AKNA FAM65B IQ…	0.809909	#440154	0.5	0	5	0.545782
4310	10.661	-1.04539	Cluster 10	Negative Regulation Of Heterotypic Cell-Cell Adhesion (GO:0034115)	IL1RN MAP2K5 IL10 WNK1 APOA1 MYADM MAPK7 KLF4 MBL2 IL1RN BCL3 RNF19B IL27 PFKFB3 FOSL2 ICAM1 SOCS3 EHD1 IL10 SLAMF7 TNIP1 ZC3H12A TICAM1 NIPAL4 MMP19 LILRB2 KLF4 ACOD1 STX11 DHX58 PLAUR TNFAIP2 FFAR3 MAPK7 TRAF1 MAPKAPK2 SIGLEC1 ABTB2 SBNO2 AMPD3 MYADM ARHGEF11 GRAMD1A SPSB1 HELZ2 ELF4 MAN2B1 TNFRSF1B NINJ1 OGFR CSRNP1 IL10RA NFKB2 PTPN1 TNF TRIP10 CD274 PIM3 ELL SOD2 MGAT1 FCAMR GRN SPHK1 LILRB4…	3.07365e-06	#aec7e8	0.5	0	12	3.25617		151	9.86906	-2.17212	Cluster 0	Positive Regulation Of RIG-I Signaling Pathway (GO:1900246)	USP15 DHX58 TRIM15 PUM2 PUM1 ZCCHC3 OASL DDX60 USP17L2 DHX58 OASL DDX60 IFIT3 MX2 IFIT2 CMPK2 RSAD2 OAS2 HELZ2 PARP14 RNF19B IL27 SAMD9 IFIH1 SLAMF7 CASP5 DDX60L MX1 TRAF1 OAS1 TRIM25 GBP2 DDX58 USP15 EPSTI1 ACOD1 APOL6 TAP1 IL1RN IFIT1 LILRB2 IFI44 PARP12 CD274 OAS3 SOCS1 SOD2 GBP1 TNIP1 DTX3L ISG15 SIGLEC1 IRF7 CXCL11 LYN TNFAIP2 ZC3H12A RNF213 ISG20 IL10RA FFAR3 ZNFX1 NFKB2 BATF2 TLR8 ICAM1 TD…	1.40977e-09	#440154	0.5	0	12	4.92543		151	9.86906	-2.17212	Cluster 0	Positive Regulation Of RIG-I Signaling Pathway (GO:1900246)	USP15 DHX58 TRIM15 PUM2 PUM1 ZCCHC3 OASL DDX60 USP17L2 DHX58 OASL DDX60 IFIT3 MX2 IFIT2 CMPK2 RSAD2 OAS2 HELZ2 PARP14 RNF19B IL27 SAMD9 IFIH1 SLAMF7 CASP5 DDX60L MX1 TRAF1 OAS1 TRIM25 GBP2 DDX58 USP15 EPSTI1 ACOD1 APOL6 TAP1 IL1RN IFIT1 LILRB2 IFI44 PARP12 CD274 OAS3 SOCS1 SOD2 GBP1 TNIP1 DTX3L ISG15 SIGLEC1 IRF7 CXCL11 LYN TNFAIP2 ZC3H12A RNF213 ISG20 IL10RA FFAR3 ZNFX1 NFKB2 BATF2 TLR8 ICAM1 TD…	8.69763e-08	#440154	0.5	0	12	4.0303
4311	10.7283	-1.39659	Cluster 10	Positive Regulation Of T-helper 1 Cell Cytokine Production (GO:2000556)	IL1B IL1R1 XCL1 TBX21 IL18R1 IL1R1 IL18R1 IL1B XCL1 TBX21 XCL2 NFKB1 IL4I1 TNF NFKBIA CXCL3 PTGS2 CXCL8 IRAK2 IL1A RNPEPL1 SERPINB2 TNFAIP8 ZC3H12A KIR2DL1 RP11.74D7.1 TRAF1 GPR84 SOCS3 TNIP3 NINJ1 RUNX3 LCP2 RAB29 PLAUR TNIP1 IL12RB2 ICAM1 OLR1 GBP2 PARP15 PFKFB3 TNFRSF1B EHD1 AMPD3 NFKB2 BFSP1 ADORA2A ITGAL TRIM21 RNF19B ACSL1 CCDC159 PIK3R5 LPXN TLR2 IER3 BCL3 LILRB2 CCRL2 MMP19 SQRDL SOD2 AC0…	2.47032e-05	#aec7e8	0.5	0	12	2.80362		152	9.51673	-1.28015	Cluster 0	Bone Resorption (GO:0045453)	RAB3D SRC IL7 PTH GPR55 PTK2B TPP1 ZNF675 PTK2B GPR55 TPP1 IRF5 PRKCD LILRB1 STX11 LILRB2 TNFRSF1B TSPAN33 PIK3R5 TRAF1 MYO1G TNIP1 LAPTM5 HCK LYN TNFRSF14 SRC PILRA NOD2 LGALS9 NFKB2 TFEB EHD1 SLC15A3 PTPN6 MYO9B MAN2B1 STXBP2 NFKBIE FERMT3 THEMIS2 CD40 CD68 IL7 CYTH1 LCP1 OSCAR NINJ1 PIK3AP1 PLEKHO1 GPSM3 BCL3 GMIP ADGRE2 SIGLEC9 MSC HLA.A ARAP1 AMPD3 HCLS1 RNF19B TLR2 NCF2 TBXAS1 TNFAIP2 MX2 S…	1.77381e-08	#440154	0.5	0	12	4.37555		152	9.51673	-1.28015	Cluster 0	Bone Resorption (GO:0045453)	RAB3D SRC IL7 PTH GPR55 PTK2B TPP1 ZNF675 PTK2B GPR55 TPP1 IRF5 PRKCD LILRB1 STX11 LILRB2 TNFRSF1B TSPAN33 PIK3R5 TRAF1 MYO1G TNIP1 LAPTM5 HCK LYN TNFRSF14 SRC PILRA NOD2 LGALS9 NFKB2 TFEB EHD1 SLC15A3 PTPN6 MYO9B MAN2B1 STXBP2 NFKBIE FERMT3 THEMIS2 CD40 CD68 IL7 CYTH1 LCP1 OSCAR NINJ1 PIK3AP1 PLEKHO1 GPSM3 BCL3 GMIP ADGRE2 SIGLEC9 MSC HLA.A ARAP1 AMPD3 HCLS1 RNF19B TLR2 NCF2 TBXAS1 TNFAIP2 MX2 S…	0.0140773	#440154	0.5	0	12	1.42574
4312	10.6513	-1.24067	Cluster 10	Negative Regulation Of Monooxygenase Activity (GO:0032769)	CYP27B1 CAV3 GFI1 NOSIP GLA NFKB1 SNCA NFKB1 CYP27B1 GLA TRAF1 TNIP1 IL1RN SQRDL PLAUR SLAMF7 MSC AMPD3 LILRB4 EHD1 RNF19B CD274 NFKB2 NINJ1 GPR84 ADORA2A ICAM1 CCR5 ZC3H12A SLC15A3 PIK3R5 CD40 TNFRSF1B MMP19 TNF GFI1 PILRA LILRB2 LCP2 STX11 CCRL2 CD68 MAN2B1 EMILIN2 FERMT3 RELB IL27 NOSIP PSTPIP2 PIM3 IL10RA DHX58 TNFAIP8 SPHK1 TNFAIP2 GBP2 IL10 NFKBIE SOD2 MAP2K3 CTSZ SLAMF1 SLC2A6 GPR132 MMP9 …	3.58167e-10	#aec7e8	0.5	0	12	5.22296		153	8.73928	-1.74229	Cluster 0	Positive Regulation Of CD4-positive, Alpha-Beta T Cell Activation (GO:2000516)	SOCS1 NCKAP1L XCL1 CD81 TNFSF4 HLA-DRA PRKCQ LGALS9 ZBTB7B HLA-DRB3 TGFBR2 HLA-DRB1 LGALS9 NCKAP1L MAN2B1 MGAT1 LAPTM5 LCP2 TAP1 MYO9B PPP1R18 HLA.A HCLS1 GNAI2 WIPF1 TNFRSF14 ARAP1 STAT6 CD4 RHOG TCIRG1 TGFB1 GPSM3 HLA.E PLEKHO2 CYTH1 SLC15A3 TNFRSF1B PIK3R5 PTPN6 MYO1G RIN3 LCP1 IL10RA DOCK2 UNC93B1 RPS6KA1 ANXA11 FERMT3 PRKCD TNIP1 CD53 CSK TYMP GRN THEMIS2 TLN1 HLA.B ARHGAP4 SH3BP1 HCK STXBP2…	1.71725e-06	#440154	0.5	0	12	3.38258		153	8.73928	-1.74229	Cluster 0	Positive Regulation Of CD4-positive, Alpha-Beta T Cell Activation (GO:2000516)	SOCS1 NCKAP1L XCL1 CD81 TNFSF4 HLA-DRA PRKCQ LGALS9 ZBTB7B HLA-DRB3 TGFBR2 HLA-DRB1 LGALS9 NCKAP1L MAN2B1 MGAT1 LAPTM5 LCP2 TAP1 MYO9B PPP1R18 HLA.A HCLS1 GNAI2 WIPF1 TNFRSF14 ARAP1 STAT6 CD4 RHOG TCIRG1 TGFB1 GPSM3 HLA.E PLEKHO2 CYTH1 SLC15A3 TNFRSF1B PIK3R5 PTPN6 MYO1G RIN3 LCP1 IL10RA DOCK2 UNC93B1 RPS6KA1 ANXA11 FERMT3 PRKCD TNIP1 CD53 CSK TYMP GRN THEMIS2 TLN1 HLA.B ARHGAP4 SH3BP1 HCK STXBP2…	0.0034105	#440154	0.5	0	12	1.73359
4313	10.6303	-0.990465	Cluster 10	Regulation Of Cell Adhesion Molecule Production (GO:0060353)	FUT7 CXCL8 IL1B NOTCH4 NOTCH1 CAV1 CXCL8 IL1B PTGS2 CXCL3 NOTCH1 IRAK2 SBNO2 PFKFB3 PLAUR TNIP1 TLR2 GPR84 ZC3H12A EHD1 SERPINB2 ADORA2A TNFAIP2 PIK3R5 BCL3 SLC43A2 LILRB2 IL1A PPP1R18 HCAR2 TNFRSF1B SOCS3 KDM6B ACSL1 TNF GRAMD1A CEBPB IER3 HCK NFKB2 ADGRE2 AQP9 ITGAX PILRA RNF19B VASP NFKB1 GNAI2 CD93 FUT7 DENND5A OLR1 C5AR1 AMPD3 NINJ1 ARHGAP31 TREM1 SIRPA ARAP1 LILRB3 CCRL2 MYO9B SPI1 PLEKHO2 …	1.4844e-12	#aec7e8	0.5	0	12	6.41422		154	8.99591	-1.73174	Cluster 0	Positive Regulation Of CD4-positive, Alpha-Beta T Cell Differentiation (GO:0043372)	SOCS1 NCKAP1L TNFSF4 HLA-DRA KLHL25 ZBTB7B HLA-DRB1 NCKAP1L SOCS1 LCP2 ZBTB7B TNFSF4 MYO1G DOCK2 MAN2B1 TRAF1 ATP10A OR7E33P IL10RA MYO9B LGALS9 LCP1 LAPTM5 PIK3R5 MPHOSPH8 COX17P1 PLEKHO1 NFKB2 TNFRSF1B ADCY7 WIPF1 TAP1 CD4 TNIP1 IRF5 PPP1R18 CYTH1 EHD1 LILRB2 RPS27P29 FBXW5 FERMT3 KLHL25 PRKCD SLC15A3 GPSM3 STX11 HCLS1 TPT1P7 DHX58 PIK3AP1 CSK HCK RELB CD53 IKZF1 THEMIS2 TSPAN33 C10ORF142 OSCAR…	1.55066e-06	#440154	0.5	0	12	3.40474		154	8.99591	-1.73174	Cluster 0	Positive Regulation Of CD4-positive, Alpha-Beta T Cell Differentiation (GO:0043372)	SOCS1 NCKAP1L TNFSF4 HLA-DRA KLHL25 ZBTB7B HLA-DRB1 NCKAP1L SOCS1 LCP2 ZBTB7B TNFSF4 MYO1G DOCK2 MAN2B1 TRAF1 ATP10A OR7E33P IL10RA MYO9B LGALS9 LCP1 LAPTM5 PIK3R5 MPHOSPH8 COX17P1 PLEKHO1 NFKB2 TNFRSF1B ADCY7 WIPF1 TAP1 CD4 TNIP1 IRF5 PPP1R18 CYTH1 EHD1 LILRB2 RPS27P29 FBXW5 FERMT3 KLHL25 PRKCD SLC15A3 GPSM3 STX11 HCLS1 TPT1P7 DHX58 PIK3AP1 CSK HCK RELB CD53 IKZF1 THEMIS2 TSPAN33 C10ORF142 OSCAR…	0.101995	#440154	0.5	0	5	0.995711
4314	10.7222	-1.39033	Cluster 10	Positive Regulation Of T-helper 2 Cell Cytokine Production (GO:2000553)	IL4 PRKCZ IL6 DENND1B XCL1 RSAD2 NLRP3 IL6 RSAD2 NLRP3 IL1B RNF19B CMPK2 OASL IFIT3 TNF IFIT2 ZC3H12A ACOD1 DHX58 SLAMF7 PTGS2 BCL2A1 IL27 NFKB1 CCRL2 TRAF1 IL1RN IRAK2 CD274 DENND1B SOD2 LILRB2 PLAUR GPR84 ICAM1 HELZ2 PFKFB3 CXCL11 CXCL8 MTF1 IL10RA STX11 SOCS3 IL10 NR4A3 GBP1 TNIP3 NINJ1 MX2 CCR5 IFIH1 XCL1 IL4 IL1A ADORA2A LILRB4 TNFAIP2 SERPINB2 TNFAIP8 SIGLEC1 EPSTI1 CXCL3 OAS2 CASP5 GPR132 …	1.88206e-13	#aec7e8	0.5	0	12	6.86268		155	8.79222	-1.88495	Cluster 0	Positive Regulation Of CD8-positive, Alpha-Beta T Cell Activation (GO:2001187)	NCKAP1L XCL1 RUNX1 PTPN22 HLA-A LILRB4 RUNX3 HLA-E NCKAP1L RUNX3 LAPTM5 DOCK2 LCP1 MYO1G HCLS1 CD53 PIK3R5 IL10RA LGALS9 MAN2B1 PTPN6 PARVG ADCY7 LILRB4 TNFRSF1B MYO9B CYTH1 IRF5 EMILIN2 CD4 ARHGAP30 LPXN SLC15A3 PIK3AP1 RASSF5 DOCK8 LCP2 PTPN22 IKZF1 WIPF1 CD84 PLCB2 CHST11 ITGAL THEMIS2 VAV1 NLRC5 LILRB1 AOAH FMNL1 PILRA LILRB2 RUNX1 ARHGAP4 FERMT3 NRROS RIN3 HCK CYTH4 LYN OSCAR AKNA STAT5A TAP…	1.8257e-07	#440154	0.5	0	12	3.86928		155	8.79222	-1.88495	Cluster 0	Positive Regulation Of CD8-positive, Alpha-Beta T Cell Activation (GO:2001187)	NCKAP1L XCL1 RUNX1 PTPN22 HLA-A LILRB4 RUNX3 HLA-E NCKAP1L RUNX3 LAPTM5 DOCK2 LCP1 MYO1G HCLS1 CD53 PIK3R5 IL10RA LGALS9 MAN2B1 PTPN6 PARVG ADCY7 LILRB4 TNFRSF1B MYO9B CYTH1 IRF5 EMILIN2 CD4 ARHGAP30 LPXN SLC15A3 PIK3AP1 RASSF5 DOCK8 LCP2 PTPN22 IKZF1 WIPF1 CD84 PLCB2 CHST11 ITGAL THEMIS2 VAV1 NLRC5 LILRB1 AOAH FMNL1 PILRA LILRB2 RUNX1 ARHGAP4 FERMT3 NRROS RIN3 HCK CYTH4 LYN OSCAR AKNA STAT5A TAP…	0.0564699	#440154	0.5	0	5	1.12409
4315	10.4305	-0.659468	Cluster 10	Regulation Of Extrinsic Apoptotic Signaling Pathway Via Death Domain Receptors (GO:1902041)	GPX1 FGB FGG NOS3 FEM1B CFLAR TMC8 SCRT2 TMBIM1 BMP5 BCL2L1 FAIM RNF34 DDX3X GSK3B SP100 SERPINE1 TNFAIP3 PEA15 ETFA THBS1 BRCA1 FAIM2 SFRP1 ICAM1 LGALS3 HMOX1 PMAIP1 STX4 FGA RFFL TMBIM1 TNIP1 MGAT1 CTSZ EHD1 CD68 ICAM1 LAMP1 MYO9B SLC15A3 GRN NFKB2 PIK3R5 FGA FGG NINJ1 FCGRT MAP2K3 SPHK1 FGB HMOX1 USP12 MAN2B1 SQRDL MAPKAPK2 RELB ZC3H12A PLAUR AMPD3 FURIN TOM1 SRC PLEKHO2 BCL3 CEBPB RNF19B CTSB…	9.90428e-09	#aec7e8	0.5	0	12	4.50209		156	8.36279	-1.00523	Cluster 0	Regulation Of Superoxide Metabolic Process (GO:0090322)	BST1 SYK GCH1 DHFR FBLN5 BST1 SYK GCH1 NCF2 HCK LYN LILRB2 CTSS LILRB3 THEMIS2 TLR8 OSCAR ALOX5 FGR NADK SPI1 ARRB2 LRRC25 TLR2 IL17RA C10ORF54 MPEG1 APOBR LCP1 CFP STX11 NFAM1 AOAH WAS NOD2 PILRA LILRA6 NCF1B HK3 LAPTM5 AP5B1 TNFRSF1B CSF2RB MYO1F ITGAX PLBD1 TLR4 PRKCD C5AR1 ELF4 PTAFR SECTM1 HCLS1 VASP NCF4 SIRPB1 ARAP1 ARHGAP30 SIGLEC9 NCF1 MYD88 FMNL1 DOK3 EMILIN2 LILRA2 PLCB2 EVI2B DOCK2 SI…	2.09664e-10	#440154	0.5	0	12	5.33924		156	8.36279	-1.00523	Cluster 0	Regulation Of Superoxide Metabolic Process (GO:0090322)	BST1 SYK GCH1 DHFR FBLN5 BST1 SYK GCH1 NCF2 HCK LYN LILRB2 CTSS LILRB3 THEMIS2 TLR8 OSCAR ALOX5 FGR NADK SPI1 ARRB2 LRRC25 TLR2 IL17RA C10ORF54 MPEG1 APOBR LCP1 CFP STX11 NFAM1 AOAH WAS NOD2 PILRA LILRA6 NCF1B HK3 LAPTM5 AP5B1 TNFRSF1B CSF2RB MYO1F ITGAX PLBD1 TLR4 PRKCD C5AR1 ELF4 PTAFR SECTM1 HCLS1 VASP NCF4 SIRPB1 ARAP1 ARHGAP30 SIGLEC9 NCF1 MYD88 FMNL1 DOK3 EMILIN2 LILRA2 PLCB2 EVI2B DOCK2 SI…	0.279944	#440154	0.5	0	5	0.776464
4316	9.63092	2.73478	Cluster 10	Negative Regulation Of Endothelial Cell Apoptotic Process (GO:2000352)	IL11 FGB IL10 FGG PDPK1 IL13 IL4 TNIP2 TEK GAS6 RAMP2 NFE2L2 SEMA5A SERPINE1 TNFAIP3 NDNF GATA3 GATA2 ICAM1 CDH5 KDR KRIT1 PAK4 MAPK7 FGA MEN1 FGA FGB FGG NECTIN2 PLXND1 CDH5 LAMB2 SPSB1 EPAS1 SDF4 NUCB1 NDST1 PXDC1 RRBP1 ICAM1 TGFBR2 PDGFB TRIP10 NID1 SLC12A4 TEK MYO1C CHPF2 FURIN TAOK2 SEC61A1 LAMP1 AKAP2 HPX FGL1 LAMB1 ACVRL1 PVR HDLBP H6PD ECE1 TMEM63B P4HB MAPKAPK2 IGFBP4 A2M ENG TIE1 GRINA …	0.0776032	#aec7e8	0.5	0	5	1.05506		157	8.28252	-0.96016	Cluster 0	Regulation Of Superoxide Anion Generation (GO:0032928)	TGFB1 CD177 ITGB2 CRP PRKCD SYK GSTP1 FPR2 TYROBP ITGAM SOD1 CLEC7A MAPT F2RL1 HCK LILRB3 SPI1 MYO1F ARRB2 NCF2 FGR ITGAX NFAM1 SIGLEC9 APOBR LRRC25 HK3 C10ORF54 ITGAM ARAP1 THEMIS2 OSCAR FPR1 WAS FMNL1 EFHD2 PRKCD CSF2RB ALOX5 TLR8 C5AR1 IL17RA NADK ADAM8 VASP CFP LILRA6 CTSS PLCB2 TLR2 PTAFR SIRPB1 NCF1B SIGLEC5 P2RY13 CYTH4 PILRA GMIP FPR2 GPSM3 PLBD1 ADGRE5 NCF1 GLT1D1 ABTB1 CEACAM3 EVI2B SMA…	3.51903e-08	#440154	0.5	0	12	4.22679		157	8.28252	-0.96016	Cluster 0	Regulation Of Superoxide Anion Generation (GO:0032928)	TGFB1 CD177 ITGB2 CRP PRKCD SYK GSTP1 FPR2 TYROBP ITGAM SOD1 CLEC7A MAPT F2RL1 HCK LILRB3 SPI1 MYO1F ARRB2 NCF2 FGR ITGAX NFAM1 SIGLEC9 APOBR LRRC25 HK3 C10ORF54 ITGAM ARAP1 THEMIS2 OSCAR FPR1 WAS FMNL1 EFHD2 PRKCD CSF2RB ALOX5 TLR8 C5AR1 IL17RA NADK ADAM8 VASP CFP LILRA6 CTSS PLCB2 TLR2 PTAFR SIRPB1 NCF1B SIGLEC5 P2RY13 CYTH4 PILRA GMIP FPR2 GPSM3 PLBD1 ADGRE5 NCF1 GLT1D1 ABTB1 CEACAM3 EVI2B SMA…	0.0154774	#440154	0.5	0	12	1.40515
4317	10.5206	-0.854002	Cluster 10	Negative Regulation Of Endoplasmic Reticulum Unfolded Protein Response (GO:1900102)	PPP1R15B PTPN1 WFS1 HSPA5 ATF6B PPP1R15A BFAR UFL1 DDRGK1 DNAJB9 RACK1 NCK1 NCK2 PTPN1 HSPA5 PPP1R15A PPP1R15B ZC3H12A DNAJB9 DDRGK1 TICAM1 MAPKAPK2 ICAM1 SEC61A1 TNIP1 IER3 ZDHHC5 CSRNP1 WFS1 NFKB2 EHD1 LAMP1 RELB CHMP4B MAFG PIM3 SRPRA DUSP5 SLC39A7 SDF4 RIPK1 MGAT1 NCK1 RAB35 PLAUR P4HB SURF4 GADD45B GRN TNFAIP3 SPSB1 SQSTM1 MAN2B1 FBRS BCL3 GRINA TRIP10 PFKFB3 HM13 KHNYN GAA ATF6B NFKBIA GRAM…	0.0235386	#aec7e8	0.5	0	12	1.31411		158	9.16421	-1.39258	Cluster 0	Negative Regulation Of Response To External Stimulus (GO:0032102)	PTPN2 LACRT MUL1 OCRL ISL1 ATG12 FNDC4 LRFN5 SELENOS TRAFD1 OTULIN TEK EPHA4 RB1 SERPINE1 GPS2 AHR METRNL CLDN3 CXCL17 AURKB CDH5 IFI16 ALOX5 AKT1 NLRP3 BANF1 SLC39A8 CCN3 GHSR ELANE PRKCD NR1D1 CASK MFHAS1 PROC IL22RA1 CEP63 CARD16 CERS2 MAPKBP1 PRKDC GBA1 GATA3 FGF2 RORA C1QTNF3 MMP26 PCBP2 SIRPA TREX1 FFAR4 APOE TRIM65 ATG5 DUSP3 IL10 IL13 IL10RA CARD8 TNFRSF1A AJAP1 IL4 CYLD ELF4 RTN4RL1 MMRN…	0.0146757	#440154	0.5	0	12	1.4167		158	9.16421	-1.39258	Cluster 0	Negative Regulation Of Response To External Stimulus (GO:0032102)	PTPN2 LACRT MUL1 OCRL ISL1 ATG12 FNDC4 LRFN5 SELENOS TRAFD1 OTULIN TEK EPHA4 RB1 SERPINE1 GPS2 AHR METRNL CLDN3 CXCL17 AURKB CDH5 IFI16 ALOX5 AKT1 NLRP3 BANF1 SLC39A8 CCN3 GHSR ELANE PRKCD NR1D1 CASK MFHAS1 PROC IL22RA1 CEP63 CARD16 CERS2 MAPKBP1 PRKDC GBA1 GATA3 FGF2 RORA C1QTNF3 MMP26 PCBP2 SIRPA TREX1 FFAR4 APOE TRIM65 ATG5 DUSP3 IL10 IL13 IL10RA CARD8 TNFRSF1A AJAP1 IL4 CYLD ELF4 RTN4RL1 MMRN…	0.887596	#440154	0.5	0	5	0.525892
4318	10.699	-0.958597	Cluster 10	Regulation Of Extrinsic Apoptotic Signaling Pathway In Absence Of Ligand (GO:2001239)	MAP2K5 EYA1 EYA2 UNC5B EYA3 EYA4 INHBA IL1A IL1B GDNF BCL2L1 FGFR1 SNAI2 HSPA1A BCL2 PF4 HSPA1B RET CSF2 HTRA2 TNF IFI6 GATA1 PPP2R1B TERT MAPK7 MCL1 IL1B TNF IL1A ZC3H12A CXCL3 PTGS2 IER3 TNIP1 EHD1 SERPINB2 PLAUR PFKFB3 IRAK2 ADORA2A TICAM1 HELZ2 NFKB2 CXCL8 IL6 TRAF1 SRC MAPKAPK2 RNF19B SPHK1 CD274 TRIP10 NFKB1 GRAMD1A PIM3 ICAM1 SOCS3 GPR84 SBNO2 CEBPB AMPD3 MSC CCRL2 MOB3C RAB35 SNX9 SPSB1 E…	0.000927567	#aec7e8	0.5	0	12	2.01633		159	8.55751	-1.35215	Cluster 0	Negative Regulation Of Response To Cytokine Stimulus (GO:0060761)	TLE5 MAP2K5 PTPRC IRAK3 PALM3 IL36RN MAPK7 KLF4 SH2B3 SIGIRR IRAK3 MCL1 FMNL1 THEMIS2 PLCB2 AOAH CTSS MPEG1 ARAP1 NBEAL2 ELF4 FGR PTPRC ARRB2 IL17RA STX11 PLBD1 CFP GRK2 SH2B3 ADGRE5 WIPF1 LILRA1 EHBP1L1 NOD2 C10ORF54 MYO1F DOCK8 LYN DOCK2 ARHGAP30 ADCY7 NCF2 STAT6 ARHGAP45 KLF4 HCLS1 KLF13 RELT ARHGEF1 RIN3 HCK TLR8 SUN2 CYTH1 ARHGAP4 EVI2B GMIP AKNA ITGAX TLR2 WAS AP5B1 LCP1 SH3BP1 MYO9B PARVG …	0.000147438	#440154	0.5	0	12	2.41569		159	8.55751	-1.35215	Cluster 0	Negative Regulation Of Response To Cytokine Stimulus (GO:0060761)	TLE5 MAP2K5 PTPRC IRAK3 PALM3 IL36RN MAPK7 KLF4 SH2B3 SIGIRR IRAK3 MCL1 FMNL1 THEMIS2 PLCB2 AOAH CTSS MPEG1 ARAP1 NBEAL2 ELF4 FGR PTPRC ARRB2 IL17RA STX11 PLBD1 CFP GRK2 SH2B3 ADGRE5 WIPF1 LILRA1 EHBP1L1 NOD2 C10ORF54 MYO1F DOCK8 LYN DOCK2 ARHGAP30 ADCY7 NCF2 STAT6 ARHGAP45 KLF4 HCLS1 KLF13 RELT ARHGEF1 RIN3 HCK TLR8 SUN2 CYTH1 ARHGAP4 EVI2B GMIP AKNA ITGAX TLR2 WAS AP5B1 LCP1 SH3BP1 MYO9B PARVG …	0.3909	#440154	0.5	0	5	0.703967
4319	10.8219	-0.969246	Cluster 10	Regulation Of Establishment Of Endothelial Barrier (GO:1903140)	PPP1R12A ROCK1 ROCK2 ZDHHC21 TNF F11R TNFRSF1A VEGFA PROC IL1B IKBKB CDH5 CLDN5 S1PR2 S1PR3 VCL TGFBR2 IL1B CD93 FNDC3B ANO6 PLXND1 ROCK2 TLN1 PECAM1 ARHGAP31 IGF2R IRAK2 PDGFB TNF PFKFB3 CDH5 TNFRSF1A ECE1 MYH9 IL13RA1 ZC3H12A ROCK1 SRC FOSL2 NID1 VCL ATP13A3 IKBKB TMBIM1 SOD2 TNIP1 CXCL3 PTGS2 RRBP1 SOCS3 TMEM127 EPAS1 B4GALT5 ICAM1 USP12 ACVRL1 BCL3 SBNO2 TJP2 IER3 F11R LAMP1 ACSL1 SERPINB2 H6…	6.46794e-08	#aec7e8	0.5	0	12	4.09462		160	9.09908	-1.42861	Cluster 0	Negative Regulation Of Response To Biotic Stimulus (GO:0002832)	LACRT RNF26 DEFB118 PARP1 NFKBIL1 MUL1 DEFB114 CARD8 YWHAZ IRGM ZDHHC18 ITCH ATG12 PPM1B MYO1C TRAFD1 TYRO3 CEP63 CARD16 CACTIN LTF SIGIRR TRIB1 TRAF3IP1 MAPKBP1 TNFAIP3 PRKDC CGAS DTX4 LILRA2 NLRC3 AURKB ILRUN PPP6C IRAK3 IFI16 DHX58 PCBP2 C1QBP AKT1 TREX1 BANF1 TRIM21 LYAR ATG5 FMNL1 VASP ARHGAP30 ZDHHC18 NADK WAS CORO1A GRK2 GRK6 CSK ARRB2 NBEAL2 LCP1 GPSM3 ELF4 HCLS1 ARHGAP45 ADGRE5 SHKBP1 EF…	0.0084812	#440154	0.5	0	12	1.53577		160	9.09908	-1.42861	Cluster 0	Negative Regulation Of Response To Biotic Stimulus (GO:0002832)	LACRT RNF26 DEFB118 PARP1 NFKBIL1 MUL1 DEFB114 CARD8 YWHAZ IRGM ZDHHC18 ITCH ATG12 PPM1B MYO1C TRAFD1 TYRO3 CEP63 CARD16 CACTIN LTF SIGIRR TRIB1 TRAF3IP1 MAPKBP1 TNFAIP3 PRKDC CGAS DTX4 LILRA2 NLRC3 AURKB ILRUN PPP6C IRAK3 IFI16 DHX58 PCBP2 C1QBP AKT1 TREX1 BANF1 TRIM21 LYAR ATG5 FMNL1 VASP ARHGAP30 ZDHHC18 NADK WAS CORO1A GRK2 GRK6 CSK ARRB2 NBEAL2 LCP1 GPSM3 ELF4 HCLS1 ARHGAP45 ADGRE5 SHKBP1 EF…	0.0402689	#440154	0.5	0	12	1.19752
4320	10.6952	-0.507166	Cluster 10	Negative Regulation Of Nitric Oxide Metabolic Process (GO:1904406)	KHSRP PTGIS ZC3H12A ROCK2 CAV1 SIRPA GLA LAMP1 SIRPA ZC3H12A PLEKHM2 TNIP1 SPHK1 PLAUR CTSZ RAB35 MGAT1 SRC ICAM1 CHMP4B ZDHHC5 MAPKAPK2 TRIP10 GRN EHD1 IER3 PFKFB3 MMP14 ARHGEF11 SDF4 WDR1 TFE3 METRNL MAN2B1 CEBPB SBNO2 TICAM1 CD68 TPM4 ACTN1 CAV1 GLA NFKB2 GRINA SLC15A3 MMP19 NUCB1 DRAM1 SNX9 BCL3 MYO9B ABCC1 OGFR FAM129B CTSB TNS3 B4GALT5 GPR84 RAB5C TLN1 MSC LMNA LRP1 SZRD1 LRRC59 LGALS1 PXDC…	7.81735e-09	#aec7e8	0.5	0	12	4.55347		161	8.03037	-1.17612	Cluster 0	Regulation Of Stem Cell Division (GO:2000035)	ESRRB NCOA3 SFRP2 EVI2B PRDM15 SMYD5 MLLT3 PRDM15 NCOA3 ESRRB MLLT3 SMYD5 SFRP2 EVI2B USP32 FAM65B CDC42SE1 P2RY13 SMAP2 LCP1 PREX1 PIK3CD CXCR2 TNFRSF10C ZNF217 MNDA WAS PTPRC HCLS1 VNN2 WIPF1 ARHGAP30 LYN RASGRP4 FPR2 CXCR1 CD300A FPR1 DOCK8 FRAT2 PAX5 MOB3A NCF1B FFAR2 ZDHHC18 AKNA MYO1F SLC12A9 PSD4 XPO6 CD37 SIRPB1 CORO1A SELPLG BCAS3 SELL SLC12A6 GLT1D1 CSF2RB CSK NADK FMNL1 FCGR3B ICAM3 N4…	0.000661371	#440154	0.5	0	12	2.08978		161	8.03037	-1.17612	Cluster 0	Regulation Of Stem Cell Division (GO:2000035)	ESRRB NCOA3 SFRP2 EVI2B PRDM15 SMYD5 MLLT3 PRDM15 NCOA3 ESRRB MLLT3 SMYD5 SFRP2 EVI2B USP32 FAM65B CDC42SE1 P2RY13 SMAP2 LCP1 PREX1 PIK3CD CXCR2 TNFRSF10C ZNF217 MNDA WAS PTPRC HCLS1 VNN2 WIPF1 ARHGAP30 LYN RASGRP4 FPR2 CXCR1 CD300A FPR1 DOCK8 FRAT2 PAX5 MOB3A NCF1B FFAR2 ZDHHC18 AKNA MYO1F SLC12A9 PSD4 XPO6 CD37 SIRPB1 CORO1A SELPLG BCAS3 SELL SLC12A6 GLT1D1 CSF2RB CSK NADK FMNL1 FCGR3B ICAM3 N4…	0.00211128	#440154	0.5	0	12	1.83773
4321	10.5439	-0.482143	Cluster 10	Negative Regulation Of Nitrogen Compound Metabolic Process (GO:0051172)	TGFB1 EDN1 EDNRB HSP90AB1 ACMSD CLTC LILRB2 APOE AP2A1 NFKB1 LDLR LAMP1 RAB35 GRINA SBNO2 TGFB1 TNIP1 NFKB1 OGFR MYO9B MGAT1 NFKB2 GRN MAPKAPK2 VASP PSAP EHD1 TRIM25 ZDHHC5 ARHGEF11 ISY1.RAB43 LILRB2 MAN2B1 GNAI2 CTSZ WDR1 TLN1 UPF1 TMEM63B PLEKHM2 BCL3 NINJ1 PNPLA6 AP2A1 NUCB1 SIRPA ZC3H12A SLC15A3 ARAP1 APH1A TNFRSF1B FURIN FLII RAPGEF1 GAA SDF4 PLEKHO2 TFE3 ELF4 ARHGEF2 CEBPB RELB CHMP4B SRC S…	0.000134201	#aec7e8	0.5	0	12	2.43612		162	8.20456	-1.69837	Cluster 0	Negative Regulation Of Relaxation Of Muscle (GO:1901078)	TIFAB GRK2 PDE4D PDE4B NEUROG1 PDE4B GRK2 TIFAB FMNL1 PDE4D ARHGAP45 GMIP KLF13 PLCB2 ARHGAP4 ARHGAP30 CYTH1 ARRB2 MYO9B CCDC88B AKNA ARHGEF1 ARAP1 WAS PIK3R5 SUN2 NEUROG1 MYO1G EHBP1L1 SPI1 NLRC5 PARVG IL17RA THEMIS2 RELT DOCK2 MYO1F NCKAP1L AP5B1 HCLS1 CORO1A TYK2 TNFRSF1B PIK3CD ADCY7 SMAP2 LAPTM5 NBEAL2 APOBR RASGRP2 HCK RAPGEF1 STAT6 GPSM3 CSK KCNAB2 ADAM8 RASSF5 RASSF2 SH3BP1 ABCA7 WIPF1 IT…	0.00135531	#440154	0.5	0	12	1.93398		162	8.20456	-1.69837	Cluster 0	Negative Regulation Of Relaxation Of Muscle (GO:1901078)	TIFAB GRK2 PDE4D PDE4B NEUROG1 PDE4B GRK2 TIFAB FMNL1 PDE4D ARHGAP45 GMIP KLF13 PLCB2 ARHGAP4 ARHGAP30 CYTH1 ARRB2 MYO9B CCDC88B AKNA ARHGEF1 ARAP1 WAS PIK3R5 SUN2 NEUROG1 MYO1G EHBP1L1 SPI1 NLRC5 PARVG IL17RA THEMIS2 RELT DOCK2 MYO1F NCKAP1L AP5B1 HCLS1 CORO1A TYK2 TNFRSF1B PIK3CD ADCY7 SMAP2 LAPTM5 NBEAL2 APOBR RASGRP2 HCK RAPGEF1 STAT6 GPSM3 CSK KCNAB2 ADAM8 RASSF5 RASSF2 SH3BP1 ABCA7 WIPF1 IT…	0.101995	#440154	0.5	0	5	0.995711
4322	10.7558	-0.611559	Cluster 10	Positive Regulation Of Natural Killer Cell Mediated Immune Response To Tumor Cell (GO:0002857)	CRTAM PVR IL12B IL12A NECTIN2 NECTIN2 PVR IL12B IL12A CRTAM TRIP10 TNIP1 CD274 SPSB1 BIRC3 FAM129B CYP27B1 SLC4A2 SPHK1 BCAR1 ACTN4 AKT1S1 UBE2Z ABTB2 SRC IER3 LAMP1 PTPN1 ICAM1 SDF4 SLAMF7 PDGFB SEC61A1 GRAMD1A GRINA TNFRSF12A P4HB PDCD1LG2 MYO1C MGAT4B CD151 CLPTM1 AGRN EHD1 IL1RN SURF4 NACC1 CLCF1 IL27 ACTN1 IRAK1 ZDHHC5 LRRC59 SLC39A7 MMP14 NINJ1 ZC3H12A C17ORF96 TRAF1 TSPAN4 INF2 WDR1 TMEM63…	6.54887e-05	#aec7e8	0.5	0	12	2.59192		163	8.67319	-1.92415	Cluster 0	Positive Regulation Of MHC Class II Biosynthetic Process (GO:0045348)	IL4 XBP1 RFX5 RFXAP IFNG RFXANK SIRT1 CIITA TMEM106A JAK2 CIITA JAK2 RFX5 DOCK2 NCKAP1L TMEM106A MYO1G PARP14 PARVG DOCK8 IRF5 XBP1 LYN RFXAP FGD2 HCLS1 WDFY4 LCP1 LGALS9 SYK HLA.DRB1 PIK3AP1 CD274 IL10RA TAP1 CYTH1 LAPTM5 FNBP1 RASSF5 TEP1 IL4 PTPN6 NLRC5 ADCY7 ARHGAP30 APBB1IP LY75 LILRB1 MYO9B PLCB2 CD53 IRF8 PIK3CG STAT6 IFNG TRIM22 IKZF1 HLA.DMB WIPF1 ARHGAP4 RFXANK SIRT1 PTK2B INPP5D BTK MX…	1.98419e-06	#440154	0.5	0	12	3.35121		163	8.67319	-1.92415	Cluster 0	Positive Regulation Of MHC Class II Biosynthetic Process (GO:0045348)	IL4 XBP1 RFX5 RFXAP IFNG RFXANK SIRT1 CIITA TMEM106A JAK2 CIITA JAK2 RFX5 DOCK2 NCKAP1L TMEM106A MYO1G PARP14 PARVG DOCK8 IRF5 XBP1 LYN RFXAP FGD2 HCLS1 WDFY4 LCP1 LGALS9 SYK HLA.DRB1 PIK3AP1 CD274 IL10RA TAP1 CYTH1 LAPTM5 FNBP1 RASSF5 TEP1 IL4 PTPN6 NLRC5 ADCY7 ARHGAP30 APBB1IP LY75 LILRB1 MYO9B PLCB2 CD53 IRF8 PIK3CG STAT6 IFNG TRIM22 IKZF1 HLA.DMB WIPF1 ARHGAP4 RFXANK SIRT1 PTK2B INPP5D BTK MX…	0.073231	#440154	0.5	0	5	1.06765
4323	10.9619	-0.462548	Cluster 10	Negative Regulation Of Vascular Associated Smooth Muscle Cell Proliferation (GO:1904706)	CDKN1B TGFB3 IL10 MEF2C CDKN1A PTEN APLN SOD2 BMP4 CNN1 TAFA5 EFEMP2 GPER1 TPM1 PPARG PDCD4 PRKG1 CDKN1A EFEMP2 MYL9 SPSB1 SOD2 PDGFRB SAMD4A TAGLN ARHGAP31 CNN1 TPM1 LAMB2 PGM5 KANK2 TRIP10 IL10 LAMA4 ICAM1 EHD1 MYLK DRAM1 KIAA1462 PFKFB3 SOCS3 ADGRA2 TPM2 PARVA IL1RN SLAMF7 IL27 TNIP1 LRRC32 RNF19B EHD2 SVIL TNS1 PXDC1 KLF9 MMP19 MXRA8 IGFBP7 PDGFB OPTN PTX3 ACOD1 RRAS PRKG1 TIMP2 SPHK1 DDR2 TR…	0.00557303	#aec7e8	0.5	0	12	1.62695		164	8.25396	-1.72473	Cluster 0	Cell Projection Assembly (GO:0030031)	GSN CYFIP2 SCIN NCKAP1L NCKAP1 PARVG RAC3 PDGFA QRICH2 PARVB NEFH MTSS2 NCKAP1L PARVG PLCB2 PARVB CYFIP2 KCNAB2 PTK2B DOCK2 ADCY7 GRK2 MYO9B ARHGAP4 SUN2 NEFH DGKZ LAPTM5 MAN2B1 ARAP1 CSF1R HCLS1 DOCK8 USF1 CYTH1 TTC7A RPS6KA1 DENND3 GSN AKNA TRPM2 DENND4B ARHGAP45 CAMTA2 QRICH2 RAPGEF1 KLF13 LRCH4 CYTH4 SYK ARHGAP30 PTPN6 WDFY4 CDC42SE1 SH3BP1 CCDC88B IL17RA FMNL1 ANKRD13D LGALS9 ATP2A3 RIN3 MYO…	0.0319747	#440154	0.5	0	12	1.2476		164	8.25396	-1.72473	Cluster 0	Cell Projection Assembly (GO:0030031)	GSN CYFIP2 SCIN NCKAP1L NCKAP1 PARVG RAC3 PDGFA QRICH2 PARVB NEFH MTSS2 NCKAP1L PARVG PLCB2 PARVB CYFIP2 KCNAB2 PTK2B DOCK2 ADCY7 GRK2 MYO9B ARHGAP4 SUN2 NEFH DGKZ LAPTM5 MAN2B1 ARAP1 CSF1R HCLS1 DOCK8 USF1 CYTH1 TTC7A RPS6KA1 DENND3 GSN AKNA TRPM2 DENND4B ARHGAP45 CAMTA2 QRICH2 RAPGEF1 KLF13 LRCH4 CYTH4 SYK ARHGAP30 PTPN6 WDFY4 CDC42SE1 SH3BP1 CCDC88B IL17RA FMNL1 ANKRD13D LGALS9 ATP2A3 RIN3 MYO…	0.633102	#440154	0.5	0	5	0.599263
4324	10.7981	-1.23265	Cluster 10	Regulation Of Calcidiol 1-Monooxygenase Activity (GO:0060558)	IL1B GFI1 IFNG TNF NFKB1 TNF NFKB1 IL1B TRAF1 CD274 ZC3H12A CXCL3 SERPINB2 IRAK2 NFKB2 GPR84 ADORA2A ICAM1 TNIP1 RNF19B PLAUR EHD1 AMPD3 PTGS2 SLAMF7 PFKFB3 CXCL8 IER3 IL10 MMP19 GPR132 MSC SOCS3 CCRL2 IL1RN PIM3 ACOD1 NINJ1 IL1A CCL3L3 IL27 CCR5 TNFAIP8 SRC SLC2A6 SOD2 TNIP3 CCL3 GRAMD1A DUSP5 RELB TICAM1 OASL AC013444.1 TNFAIP2 SOCS1 NIPAL4 CD40 PIK3R5 DHX58 SQRDL IL15RA LCP2 TNFRSF1B NFKBIE LI…	3.70291e-12	#aec7e8	0.5	0	12	6.21573		165	9.49034	-1.09184	Cluster 0	Positive Regulation Of NIK/NF-kappaB Signaling (GO:1901224)	RHOA MMP8 EIF2AK2 SPHK1 TLR2 IL1B IL23A TRIP6 TLR9 PDCD4 CD27 TLR7 LIMS1 TRIM56 TLR4 TERF2IP TLR3 APP CD86 RELA NFAT5 DDX3X ILK TRADD NOD1 NOD2 TNF EGFR PYCARD IRAK1 NLRP3 RPS3 TRIM44 SASH1 TNFSF14 LAPTM5 PTP4A3 MYO1C NLRP12 TCIM TRAF6 PHB2 PHB1 LRRC19 RTKN2 IFI35 NR3C2 AGER C1QTNF4 EP300 IL12B CCL19 LGALS9 TNFRSF1B LILRB2 HCK TLR2 PIK3R5 TNIP1 PILRA LAPTM5 LYN ELF4 STX11 ARAP1 MYO9B NOD2 NCF2 BC…	3.51903e-08	#440154	0.5	0	12	4.22679		165	9.49034	-1.09184	Cluster 0	Positive Regulation Of NIK/NF-kappaB Signaling (GO:1901224)	RHOA MMP8 EIF2AK2 SPHK1 TLR2 IL1B IL23A TRIP6 TLR9 PDCD4 CD27 TLR7 LIMS1 TRIM56 TLR4 TERF2IP TLR3 APP CD86 RELA NFAT5 DDX3X ILK TRADD NOD1 NOD2 TNF EGFR PYCARD IRAK1 NLRP3 RPS3 TRIM44 SASH1 TNFSF14 LAPTM5 PTP4A3 MYO1C NLRP12 TCIM TRAF6 PHB2 PHB1 LRRC19 RTKN2 IFI35 NR3C2 AGER C1QTNF4 EP300 IL12B CCL19 LGALS9 TNFRSF1B LILRB2 HCK TLR2 PIK3R5 TNIP1 PILRA LAPTM5 LYN ELF4 STX11 ARAP1 MYO9B NOD2 NCF2 BC…	0.0317009	#440154	0.5	0	12	1.24946
4325	10.3472	-1.22502	Cluster 10	Negative Regulation Of Nervous System Development (GO:0051961)	NOTCH1 WNT3A CCL11 MBD1 WNT7A TNF PAX6 SORL1 ROBO2 ELAPOR2 TLR2 IL1B IL6 HOOK3 REST SLIT1 DYNLT1 B2M TLR2 IL1B TNF LILRB2 RNF19B ADGRE2 PIK3R5 HCK TLR8 PILRA NCF2 TNFRSF1B SOD2 CLEC4E TNFAIP2 GPR84 CXCL3 AQP9 LYN ADORA2A ITGAX SLC43A2 TRAF1 ZC3H12A STX11 PTGS2 CASP5 IL6 CXCL8 LITAF NINJ1 AMPD3 LILRB3 C5AR1 SIGLEC9 IRAK2 PLAUR IL10RA PFKFB3 CCR5 MX2 CTSS GBP2 NFKB1 TLR4 MXD1 TNIP1 SOCS3 SERPINB2 D…	2.3551e-12	#aec7e8	0.5	0	12	6.31399		166	8.00747	-0.478947	Cluster 0	Regulation Of Serine-Type Endopeptidase Activity (GO:1900003)	CR1 SPINK2 ANXA8L1 SEMG1 SEMG2 SEMG2 SEMG1 CYP4F8 PATE1 C3ORF36 MUC6 ANO1 SPINK2 ANXA8L1 CR1 ANXA8 ARHGEF37 SELL KIAA0125P2 TMEM154 LRRK2 KIAA0125P1 RNF149 MTND5P32 SLCO2A1 SORL1 RP11.925D8.3 VNN2 TLR8 GCA TLR1 KCNC3 SSH2 PTPRC MXD1 SMCHD1 MNDA PALM3 CFLAR FAM129A GJB5 NAMPT FPR2 GJB3 TLR6 IRAK3 AKAP13 TNS4 DDX60L DOCK8 FAM65B PLXNC1 EHBP1L1 STEAP4 LYST JAML DOCK5 IL17RA PYGL TRIM29 GAPT EHF CASP…	0.00261595	#440154	0.5	0	12	1.79119		166	8.00747	-0.478947	Cluster 0	Regulation Of Serine-Type Endopeptidase Activity (GO:1900003)	CR1 SPINK2 ANXA8L1 SEMG1 SEMG2 SEMG2 SEMG1 CYP4F8 PATE1 C3ORF36 MUC6 ANO1 SPINK2 ANXA8L1 CR1 ANXA8 ARHGEF37 SELL KIAA0125P2 TMEM154 LRRK2 KIAA0125P1 RNF149 MTND5P32 SLCO2A1 SORL1 RP11.925D8.3 VNN2 TLR8 GCA TLR1 KCNC3 SSH2 PTPRC MXD1 SMCHD1 MNDA PALM3 CFLAR FAM129A GJB5 NAMPT FPR2 GJB3 TLR6 IRAK3 AKAP13 TNS4 DDX60L DOCK8 FAM65B PLXNC1 EHBP1L1 STEAP4 LYST JAML DOCK5 IL17RA PYGL TRIM29 GAPT EHF CASP…	0.0564699	#440154	0.5	0	5	1.12409
4326	10.7587	-0.506935	Cluster 10	Positive Regulation Of Endothelial Cell Apoptotic Process (GO:2000353)	CD40 PRKCI ITGA4 CD160 THBS1 FASLG HLA-G ANO6 ECSCR RGCC GPER1 PDCD4 PLCG1 CCL2 CD40LG ANO6 RGCC TLN1 ARHGAP31 THBS1 TNIP1 PLXND1 CCL2 WDR1 MYH9 LAMP1 TGFBR2 EHD1 RAPGEF1 EHD4 USP12 CD40 PDGFB ICAM1 ISY1.RAB43 ECSCR DRAM1 AKAP2 MYO9B ATP13A3 NFKB2 MAPKAPK2 MGAT1 ABCC1 PDCD1LG2 PTPN1 MSC SQRDL ACTR3 MSN TRAPPC10 MMP19 MAN2B1 SPHK1 PLAUR TMBIM1 CTSZ TRAF1 FMNL3 ENG TBC1D2B CD93 CD274 SEPT9 ZC3H12A …	6.88229e-06	#aec7e8	0.5	0	12	3.08113		167	8.2311	-1.89039	Cluster 0	Regulation Of Sequestering Of Calcium Ion (GO:0051282)	TRDN FKBP1B RYR2 DIAPH1 ANXA6 PTK2B LIME1 UBASH3B MTLN ANXA6 PTK2B SUN2 DIAPH1 GRK2 CSK OGDH EHBP1L1 KLF13 CORO1A DENND4B CYTH1 MYO1G TLN1 ARHGAP45 ANXA11 PPP6R1 ARHGEF1 MYO18A MFN2 CCDC69 ARHGAP30 WIPF1 WDTC1 LIME1 GPSM3 TGFB1 GRK6 MAPKAPK2 NBEAL2 PACS1 FMNL1 AES PRKACA MEF2D DGKZ LSP1 TMC6 RAPGEF1 HCLS1 WAS MYO9B PTPN6 GMIP TYK2 NLRC5 LCP1 GNAI2 ARAP1 PIK3CD VASP SH3BP1 AKNA MKNK2 RAC2 MYOM2 RA…	0.104547	#440154	0.5	0	5	0.990344		167	8.2311	-1.89039	Cluster 0	Regulation Of Sequestering Of Calcium Ion (GO:0051282)	TRDN FKBP1B RYR2 DIAPH1 ANXA6 PTK2B LIME1 UBASH3B MTLN ANXA6 PTK2B SUN2 DIAPH1 GRK2 CSK OGDH EHBP1L1 KLF13 CORO1A DENND4B CYTH1 MYO1G TLN1 ARHGAP45 ANXA11 PPP6R1 ARHGEF1 MYO18A MFN2 CCDC69 ARHGAP30 WIPF1 WDTC1 LIME1 GPSM3 TGFB1 GRK6 MAPKAPK2 NBEAL2 PACS1 FMNL1 AES PRKACA MEF2D DGKZ LSP1 TMC6 RAPGEF1 HCLS1 WAS MYO9B PTPN6 GMIP TYK2 NLRC5 LCP1 GNAI2 ARAP1 PIK3CD VASP SH3BP1 AKNA MKNK2 RAC2 MYOM2 RA…	0.108463	#440154	0.5	0	5	0.98236
4327	10.8277	-1.19042	Cluster 10	Positive Regulation Of Acute Inflammatory Response (GO:0002675)	PTGER3 C2CD4A C2CD4B OSM PARK7 TNF OSMR PTGS2 IL1B IL6 CREB3L3 FFAR3 FFAR2 IL6ST PTGS2 IL1B TNF SOCS3 ZC3H12A IL6 ICAM1 RNF19B CXCL8 PLAUR PFKFB3 IL1RN BCL3 IER3 IL27 CXCL3 GPR84 FFAR3 IL10 IRAK2 ACOD1 TRAF1 SLAMF7 TNIP1 EHD1 MMP19 ADORA2A SOD2 OASL CCRL2 SERPINB2 CD274 AMPD3 NINJ1 NFKB1 HCAR2 CCL3L3 NIPAL4 TNFAIP2 DHX58 TNIP3 NFKB2 SLC2A6 CSF3 MSC LILRB2 CASP5 SQRDL TICAM1 IL1A SOCS1 HELZ2 SPHK1…	5.46265e-09	#aec7e8	0.5	0	12	4.6313		168	8.81222	-2.47761	Cluster 0	Regulation Of Saliva Secretion (GO:0046877)	PPP3CA TIFAB DCANP1 OPRK1 FGF10 NEUROG1 DCANP1 TIFAB OPRK1 FGF10 NEUROG1 PPP3CA MYOC SLC4A11 MGARP COL4A3 LCNL1 XKR7 COL8A2 CD1E CLEC10A RNASE6 CD1C NHLH1 SEH1L AJAP1 RP11.34E5.4 POU6F2 PTGDS CLEC4A PAFAH1B2 AGO4 CD207 KIAA0930 PTX4 TMEM114 SYNPO2 NDNF RBM4B ZMAT4 COL4A4 KCNE5 CTC.325H20.7 HLA.DRA CD86 LMX1B HLA.DPB1 LINC01529 RASAL1 PLK5 COMMD10 IGSF6 ARHGAP20 FGF7 TRPM2 CSF2RA DLL3 CD1A CAB39P1…	0.800441	#440154	0.5	0	5	0.548335		168	8.81222	-2.47761	Cluster 0	Regulation Of Saliva Secretion (GO:0046877)	PPP3CA TIFAB DCANP1 OPRK1 FGF10 NEUROG1 DCANP1 TIFAB OPRK1 FGF10 NEUROG1 PPP3CA MYOC SLC4A11 MGARP COL4A3 LCNL1 XKR7 COL8A2 CD1E CLEC10A RNASE6 CD1C NHLH1 SEH1L AJAP1 RP11.34E5.4 POU6F2 PTGDS CLEC4A PAFAH1B2 AGO4 CD207 KIAA0930 PTX4 TMEM114 SYNPO2 NDNF RBM4B ZMAT4 COL4A4 KCNE5 CTC.325H20.7 HLA.DRA CD86 LMX1B HLA.DPB1 LINC01529 RASAL1 PLK5 COMMD10 IGSF6 ARHGAP20 FGF7 TRPM2 CSF2RA DLL3 CD1A CAB39P1…	0.97954	#440154	0.5	0	5	0.504489
4328	9.89059	-1.61695	Cluster 10	Positive Regulation Of Activated T Cell Proliferation (GO:0042104)	IGFBP2 HHLA2 IL23R HMGB1 IGF1 IGF2 IL18 IL2 PPP3CA PYCARD TMIGD2 IL23A FADD TNFSF9 IL12B RPS3 IL12RB1 CD24 ICOSLG IL23A IL12B IL12RB1 ICOSLG PYCARD TMIGD2 IL23R CD40 IL2 TNFSF9 NFKBIA TRAF1 IL10 IL18 IL4I1 NFKB1 GPR132 SLAMF7 NINJ1 PIM2 IL3 P2RX4 SLAMF1 CD80 VAMP8 HLA.DRB1 PRR13 TNFAIP8 IRF5 DUSP2 RILPL2 SOCS1 TNF BST2 GRAMD1A RPL37AP1 IL27 CD274 HMGB1 IGF1 NEURL3 MB21D1 RPS3 PSMB10 ADORA2A NFKBI…	2.04052e-05	#aec7e8	0.5	0	12	2.84513		169	9.85157	-2.17362	Cluster 0	Regulation Of Ribonuclease Activity (GO:0060700)	OAS2 OAS3 PDE3A OAS1 OASL OAS2 OAS1 OAS3 MX1 IFIT3 IFIT2 HELZ2 CMPK2 MX2 RSAD2 OASL DHX58 IFIT1 STAT1 IRF7 IFIH1 IFI44 EPSTI1 SAMD9 CXCL11 PARP10 IFI35 TAP1 TRIM25 PARP12 ISG15 IFI44L TRIM22 SIGLEC1 PARP14 DDX58 IFI6 CXCL10 USP18 DTX3L IFNB1 SLAMF7 TRAF1 HERC6 ISG20 RNF19B DDX60L TNFSF10 LAP3 XAF1 DDX60 LILRB2 PML ZNFX1 APOBEC3A SAMD9L STAT2 LGALS9 LY6E TNIP1 GBP1 GBP4 IL27 CD274 PARP9 NFKB2 CD40…	1.05519e-08	#440154	0.5	0	12	4.48833		169	9.85157	-2.17362	Cluster 0	Regulation Of Ribonuclease Activity (GO:0060700)	OAS2 OAS3 PDE3A OAS1 OASL OAS2 OAS1 OAS3 MX1 IFIT3 IFIT2 HELZ2 CMPK2 MX2 RSAD2 OASL DHX58 IFIT1 STAT1 IRF7 IFIH1 IFI44 EPSTI1 SAMD9 CXCL11 PARP10 IFI35 TAP1 TRIM25 PARP12 ISG15 IFI44L TRIM22 SIGLEC1 PARP14 DDX58 IFI6 CXCL10 USP18 DTX3L IFNB1 SLAMF7 TRAF1 HERC6 ISG20 RNF19B DDX60L TNFSF10 LAP3 XAF1 DDX60 LILRB2 PML ZNFX1 APOBEC3A SAMD9L STAT2 LGALS9 LY6E TNIP1 GBP1 GBP4 IL27 CD274 PARP9 NFKB2 CD40…	3.0399e-10	#440154	0.5	0	12	5.25857
4329	10.4215	-0.381525	Cluster 10	Positive Regulation Of Protein Localization To Cell Surface (GO:2000010)	MAP1A RIC3 HSP90AB1 GPD1L SNX33 TNF STX4 TYROBP STX3 TMEM35A RANGRF TM9SF4 STX4 SIRPA PLEKHM2 CHMP4B GRN TNF TYROBP NINJ1 CTSZ ICAM1 SRC MMP19 SPHK1 TOM1 IER3 PILRA RNASE1 SLC15A3 ARHGEF11 GRINA PFKFB3 CD68 EHD1 AMPD3 LAMP1 PSAP GPR84 TNIP1 ABR GAA FOLR2 FCGRT TRIP10 RNF19B C1QA PLAUR RAB7B BCL3 ARL8A PLD3 MAPKAPK2 TM9SF4 METRNL SIGLEC1 LILRB2 OGFR TNFRSF1B SLC2A6 OSCAR MGAT1 STX3 WI2.1896O14.1 G…	8.60572e-11	#aec7e8	0.5	0	12	5.53261		170	7.88291	-0.260831	Cluster 0	Regulation Of Retrograde Transport, Endosome To Golgi (GO:1905279)	PRKN USP7 EIPR1 LRRK2 ATP9A USP7 LRRK2 ATP9A SMCHD1 PPP3R1 SORL1 IGF2R LYST EPB41 SSH2 CR1 USP32 PLXNC1 OGFRL1 WDFY3 KIAA0430 MXD1 YWHAG FAM168A DDX17 TLR1 SPATA20P1 MNDA KDM7A VNN2 DYNLL2 PTPRC RASSF2 WNK1 NAMPT TLR8 TRIP12 MEGF9 PICALM FGL2 KIAA1551 MARCH8 FAM129A MKRN1 TMEM154 ARHGAP26 RNF149 NIN TRANK1 IQSEC1 PREX1 KIAA1109 CHST15 TLR4 ACTR2 SNCA MBNL3 MCL1 WDR26 TCP11L2 GLT1D1 IDS PCNX1 DCAF…	1.71725e-06	#440154	0.5	0	12	3.38258		170	7.88291	-0.260831	Cluster 0	Regulation Of Retrograde Transport, Endosome To Golgi (GO:1905279)	PRKN USP7 EIPR1 LRRK2 ATP9A USP7 LRRK2 ATP9A SMCHD1 PPP3R1 SORL1 IGF2R LYST EPB41 SSH2 CR1 USP32 PLXNC1 OGFRL1 WDFY3 KIAA0430 MXD1 YWHAG FAM168A DDX17 TLR1 SPATA20P1 MNDA KDM7A VNN2 DYNLL2 PTPRC RASSF2 WNK1 NAMPT TLR8 TRIP12 MEGF9 PICALM FGL2 KIAA1551 MARCH8 FAM129A MKRN1 TMEM154 ARHGAP26 RNF149 NIN TRANK1 IQSEC1 PREX1 KIAA1109 CHST15 TLR4 ACTR2 SNCA MBNL3 MCL1 WDR26 TCP11L2 GLT1D1 IDS PCNX1 DCAF…	0.416713	#440154	0.5	0	5	0.690081
4330	10.8218	-0.473793	Cluster 10	Regulation Of Calcium Ion Import (GO:0090279)	PDGFRB FCRL3 EGF SPHK2 CTNNB1 STC1 PDGFB SLC30A1 PKD2 PLN CXCL12 LGALS3 SLN SEMG1 WNK3 EPPIN CCL3 CCL2 TRIM27 PLPP4 TRIP10 PDGFB CCL2 SPHK1 ARHGAP31 MMP14 ENG PDE4DIP WI2.1896O14.1 PLAUR PDGFRB MMP19 MSC SPSB1 LAMP1 CTSL RHOQ IER3 JPH2 LAMB2 LHFPL2 CSF1 SVIL CTSB TSPAN4 TNS3 TPM2 SAMD4A DRAM1 CTSZ SYNPO ICAM1 LGALS3 TNS1 GPR84 FYCO1 MYOM1 AMPD3 AC013461.1 PXDC1 HSPB6 LRP1 CCL3 SMYD1 LDB3 PFKFB3 L…	5.28652e-06	#aec7e8	0.5	0	12	3.13842		171	9.15366	-1.29367	Cluster 0	Regulation Of Response To External Stimulus (GO:0032101)	PDGFRA AREL1 IL1R1 WNT5A CMA1 APLP2 SHPK CYRIB FOXP1 LACC1 TNFSF4 AGTR1 GGT3P LETMD1 RELA TNC PARK7 NOD2 LRP8 HERC5 EFNB2 NLRP9 NLRP7 ADGRA2 NLRP8 NLRP5 ALOX5 NLRP6 NLRP4 GNAT1 NLRP1 NLRP2 N4BP1 F2R TIRAP TRAF3 NR1D2 SELE CAMKMT MYD88 STK24 NMT2 FBXL2 CARD16 BIRC2 PTGES BIRC3 NMT1 AKNA SPAAR GATA6 AGER SEMA7A GGT1 CCR2 ANXA1 XCL1 CAV1 NRG1 IRF1 BST1 CYLD FCGR2B BCL6 MGLL NFE2L2 GUCY2D GUCY2F DAGL…	0.000297918	#440154	0.5	0	12	2.26295		171	9.15366	-1.29367	Cluster 0	Regulation Of Response To External Stimulus (GO:0032101)	PDGFRA AREL1 IL1R1 WNT5A CMA1 APLP2 SHPK CYRIB FOXP1 LACC1 TNFSF4 AGTR1 GGT3P LETMD1 RELA TNC PARK7 NOD2 LRP8 HERC5 EFNB2 NLRP9 NLRP7 ADGRA2 NLRP8 NLRP5 ALOX5 NLRP6 NLRP4 GNAT1 NLRP1 NLRP2 N4BP1 F2R TIRAP TRAF3 NR1D2 SELE CAMKMT MYD88 STK24 NMT2 FBXL2 CARD16 BIRC2 PTGES BIRC3 NMT1 AKNA SPAAR GATA6 AGER SEMA7A GGT1 CCR2 ANXA1 XCL1 CAV1 NRG1 IRF1 BST1 CYLD FCGR2B BCL6 MGLL NFE2L2 GUCY2D GUCY2F DAGL…	0.210545	#440154	0.5	0	5	0.838327
4331	10.879	-1.1608	Cluster 10	Regulation Of Type B Pancreatic Cell Proliferation (GO:0061469)	NR4A3 NUPR1 PTPRN NR4A1 SGPP2 NR4A3 SGPP2 NR4A1 NUPR1 PTPRN BTBD19 RBM47 KCNJ6 HLA.V MROH7 ZC3H12A ZNF585B BORCS8 ICAM1 ATF3 SOCS3 TRAF1 BTG2 REL EGR3 GPX3 FNIP2 MMP19 CHGB IL10 CD83 GCH1 SOD2 PFKFB3 CPE CSRNP1 TNF SCG5 GADD45B PIM3 ABCC8 FOSL2 NFKB1 EGR1 SUSD6 SLAMF7 IL21 RP11.216M21.1 KDM6B EGR2 GCG SLC30A8 NFKB2 SCGN RP11.814E24.1 KCNK3 GAD2 KIAA1324 SSR4 BCL2A1 NEURL3 ELL2 RNF19B ADAP1 TTR PA…	0.197902	#aec7e8	0.5	0	5	0.851775		172	8.2516	-1.7829	Cluster 0	Positive Regulation Of NK T Cell Proliferation (GO:0051142)	IL23A IL18 RASAL3 TYK2 JAK2 TYK2 RASAL3 ARHGAP45 FMNL1 ARHGAP4 CYTH1 ARHGAP30 ARHGEF1 PLCB2 HCLS1 NLRC5 CCDC88B SH3BP1 NBEAL2 THEMIS2 TCIRG1 AKNA GRK2 MYO1G CORO1A WIPF1 TMC6 WAS HLA.E ADCY7 ARAP1 RASSF5 GMIP GPSM3 STAT6 DOCK2 PTPN6 ARHGAP27 PIK3CD HLA.A RIN3 LAPTM5 TMC8 JAK2 IL10RA ADAM8 LCP1 SMAP2 HLA.B DEF6 HCK CSK FGR PARVG ARRB2 SIPA1 DOCK8 TGFB1 SUN2 CD37 UNC13D LYN MYO9B LSP1 ADGRE5 STXBP2…	0.00262197	#440154	0.5	0	12	1.79069		172	8.2516	-1.7829	Cluster 0	Positive Regulation Of NK T Cell Proliferation (GO:0051142)	IL23A IL18 RASAL3 TYK2 JAK2 TYK2 RASAL3 ARHGAP45 FMNL1 ARHGAP4 CYTH1 ARHGAP30 ARHGEF1 PLCB2 HCLS1 NLRC5 CCDC88B SH3BP1 NBEAL2 THEMIS2 TCIRG1 AKNA GRK2 MYO1G CORO1A WIPF1 TMC6 WAS HLA.E ADCY7 ARAP1 RASSF5 GMIP GPSM3 STAT6 DOCK2 PTPN6 ARHGAP27 PIK3CD HLA.A RIN3 LAPTM5 TMC8 JAK2 IL10RA ADAM8 LCP1 SMAP2 HLA.B DEF6 HCK CSK FGR PARVG ARRB2 SIPA1 DOCK8 TGFB1 SUN2 CD37 UNC13D LYN MYO9B LSP1 ADGRE5 STXBP2…	0.115168	#440154	0.5	0	5	0.969334
4332	10.592	-0.639607	Cluster 10	Positive Regulation Of Nitrogen Compound Metabolic Process (GO:0051173)	TGFB1 MAP2K5 EGF WFS1 NR1H3 NR1H2 WNT7A INHBA NFKB1 KLF4 KLF2 NFKBIA SLCO1C1 PAX8 PLA2G10 IFNG EIF4G1 AGTR1 TMEM106A MTPN APP HPN CSF1 UHRF1 CHRNA7 PDGFB TNF GBA1 GATA3 INS MAPK8 AKT1 MAPK7 MAPKAPK2 TNIP1 MGAT1 OGFR GRINA EHD1 SBNO2 LAMP1 BCL3 RAB35 GRN TICAM1 SDF4 MAN2B1 ZC3H12A PFKFB3 NFKB2 PLEKHM2 GAA MYO9B PIM3 CHMP4B NUCB1 AKT1 CEBPB RAB5C TMEM127 TGFB1 IER3 SRC PDGFB ICAM1 ABCD1 FURIN NINJ1…	0.00110901	#aec7e8	0.5	0	12	1.97753		173	8.07064	-0.502744	Cluster 0	Positive Regulation Of NLRP3 Inflammasome Complex Assembly (GO:1900227)	DDX3X NEK7 PTPN22 PPP2CA MYD88 MAVS DHX33 DEPDC1B MAPK8 STMP1 USP50 PRKD1 PLCG2 CD36 TLR6 MARK4 GBP5 TLR4 TLR4 TLR6 TLR8 TLR1 LRRK2 NCF2 SMCHD1 PTPRC FAM129A SSH2 CTSS VNN2 DOCK8 LYN NAMPT RNF149 FGL2 MCL1 MNDA IGF2R FPR2 PLXNC1 LYST LCP1 BACH1 DOCK2 MXD1 CSF2RB EVI2B FAM65B TLR2 ACSL1 CR1 CLEC7A WIPF1 TMEM154 RASSF2 DOCK11 IL17RA THEMIS2 AOAH DDX60L P2RY13 SLC12A6 GBP5 TNFRSF10C OGFRL1 GLT1D1 KI…	2.09664e-10	#440154	0.5	0	12	5.33924		173	8.07064	-0.502744	Cluster 0	Positive Regulation Of NLRP3 Inflammasome Complex Assembly (GO:1900227)	DDX3X NEK7 PTPN22 PPP2CA MYD88 MAVS DHX33 DEPDC1B MAPK8 STMP1 USP50 PRKD1 PLCG2 CD36 TLR6 MARK4 GBP5 TLR4 TLR4 TLR6 TLR8 TLR1 LRRK2 NCF2 SMCHD1 PTPRC FAM129A SSH2 CTSS VNN2 DOCK8 LYN NAMPT RNF149 FGL2 MCL1 MNDA IGF2R FPR2 PLXNC1 LYST LCP1 BACH1 DOCK2 MXD1 CSF2RB EVI2B FAM65B TLR2 ACSL1 CR1 CLEC7A WIPF1 TMEM154 RASSF2 DOCK11 IL17RA THEMIS2 AOAH DDX60L P2RY13 SLC12A6 GBP5 TNFRSF10C OGFRL1 GLT1D1 KI…	0.00122408	#440154	0.5	0	12	1.95609
4333	10.4871	-1.24713	Cluster 10	Regulation Of Receptor Signaling Pathway Via JAK-STAT (GO:0046425)	GBP7 PTPN2 EGF IL10 MST1 IL10RB CAV1 IL10RA CSHL1 TYK2 GH1 GH2 PTPRC IL6 CENPJ LEP BCL3 NF2 GPI CRLF3 CALM1 DOT1L PRL TNF MST1L SOCS3 IFNL1 GHR SOCS1 ERBB4 TP53INP2 CYP1B1 HES1 SH2B3 HES5 F2R F2 HGS KIT OCIAD2 OCIAD1 LEPROT IL7R NOTCH1 IL26 CAMK2A CSH2 CSH1 EP300 CCL5 VHL JAK3 JAK2 IL10RA BCL3 RNF19B TNIP1 TRAF1 EHD1 TNFRSF1B LILRB2 ZC3H12A PIK3R5 ICAM1 TNFAIP2 SOCS3 PFKFB3 NFKB2 NINJ1 ADORA2A SL…	0.000772516	#aec7e8	0.5	0	12	2.05605		174	9.09557	-1.47673	Cluster 0	Regulation Of Response To Biotic Stimulus (GO:0002831)	DAPK1 ERAP1 ELMOD2 TIRAP TRAF3 FOXP1 FGR IRF1 FCGR2B XIAP BIRC2 NFE2L2 BIRC3 PTPN22 GATA6 CGAS CX3CL1 TREM2 LRP8 ZMPSTE24 SAMHD1 HERC5 RNF135 CASP8 TRIM5 TKFC DHX58 CD36 APPL1 CD55 N4BP1 NCF2 HCK PIK3R5 CTSS LYN TNFRSF1B PILRA LILRB2 ITGAX IRF1 THEMIS2 LAPTM5 TLR8 TLR2 SLC15A3 IL10RA NCKAP1L GBP2 ARAP1 HCLS1 TAP1 LITAF MX2 SAMHD1 NOD2 CYBB LCP1 CYTH4 PIK3AP1 DOCK2 RNF19B ARHGAP30 PARP14 STX11 LIL…	3.67441e-10	#440154	0.5	0	12	5.21741		174	9.09557	-1.47673	Cluster 0	Regulation Of Response To Biotic Stimulus (GO:0002831)	DAPK1 ERAP1 ELMOD2 TIRAP TRAF3 FOXP1 FGR IRF1 FCGR2B XIAP BIRC2 NFE2L2 BIRC3 PTPN22 GATA6 CGAS CX3CL1 TREM2 LRP8 ZMPSTE24 SAMHD1 HERC5 RNF135 CASP8 TRIM5 TKFC DHX58 CD36 APPL1 CD55 N4BP1 NCF2 HCK PIK3R5 CTSS LYN TNFRSF1B PILRA LILRB2 ITGAX IRF1 THEMIS2 LAPTM5 TLR8 TLR2 SLC15A3 IL10RA NCKAP1L GBP2 ARAP1 HCLS1 TAP1 LITAF MX2 SAMHD1 NOD2 CYBB LCP1 CYTH4 PIK3AP1 DOCK2 RNF19B ARHGAP30 PARP14 STX11 LIL…	0.0564699	#440154	0.5	0	5	1.12409
4334	10.1437	-1.25205	Cluster 10	Negative Regulation Of Cytokine Production Involved In Immune Response (GO:0002719)	TGFB1 TGFB3 TGFB2 IL10 XCL1 HFE LILRB1 APOA2 TNF LILRB4 SMAD7 FOXP3 HLA-F IRAK3 JAK3 CUEDC2 LILRB2 TNFRSF1B NINJ1 LILRB4 TRAF1 LILRB1 PIK3R5 PILRA TNIP1 BCL3 EHD1 NFKB2 IL10RA OSCAR CCR5 ICAM1 SLC15A3 RNF19B HCK IL10 TNFAIP2 TNF GPR84 ZC3H12A SLAMF7 AMPD3 PLAUR SIGLEC1 MMP19 ADORA2A DHX58 RELB IL1RN PFKFB3 GPR132 CD4 MSC CD68 TYMP MAN2B1 ADGRE2 EMILIN2 GRAMD1A IL27 SLC43A2 STX11 CD274 SBNO2 SIGLE…	9.70561e-08	#aec7e8	0.5	0	12	4.00649		175	9.2877	-1.28801	Cluster 0	Regulation Of Regulatory T Cell Differentiation (GO:0045589)	CR1 LAG3 FANCA LILRB2 SOX12 PSG4 LILRB4 HLA-G FOXO3 VSIR FOXP3 IL4I1 IRF1 DUSP10 MDK SOCS1 KAT2A BCL6 KAT5 TNFSF4 CTLA4 CD46 LILRB2 TNFRSF1B GBP2 HCK IRF1 SBNO2 LILRB3 BCL3 PILRA TLR8 RNF19B TAP1 LITAF NCF2 PIK3R5 LYN TNIP1 LCP2 OSCAR NINJ1 THEMIS2 NFKB2 STX11 ARAP1 ITGAX TNFAIP2 TYMP ADGRE2 TRIM25 MX2 TLR2 IL10RA NOD2 RELB HCLS1 OGFR RASSF5 SMAP2 FMNL1 SIGLEC9 ARRB2 SOCS1 TRAF1 EHD1 AP5B1 SPI1 D…	1.09504e-05	#440154	0.5	0	12	2.98029		175	9.2877	-1.28801	Cluster 0	Regulation Of Regulatory T Cell Differentiation (GO:0045589)	CR1 LAG3 FANCA LILRB2 SOX12 PSG4 LILRB4 HLA-G FOXO3 VSIR FOXP3 IL4I1 IRF1 DUSP10 MDK SOCS1 KAT2A BCL6 KAT5 TNFSF4 CTLA4 CD46 LILRB2 TNFRSF1B GBP2 HCK IRF1 SBNO2 LILRB3 BCL3 PILRA TLR8 RNF19B TAP1 LITAF NCF2 PIK3R5 LYN TNIP1 LCP2 OSCAR NINJ1 THEMIS2 NFKB2 STX11 ARAP1 ITGAX TNFAIP2 TYMP ADGRE2 TRIM25 MX2 TLR2 IL10RA NOD2 RELB HCLS1 OGFR RASSF5 SMAP2 FMNL1 SIGLEC9 ARRB2 SOCS1 TRAF1 EHD1 AP5B1 SPI1 D…	0.171587	#440154	0.5	0	5	0.882757
4335	10.8362	-1.18765	Cluster 10	Negative Regulation Of Vitamin Metabolic Process (GO:0046137)	PRMT3 GFI1 SNAI2 SNAI1 NFKB1 NFKB1 SNAI1 GFI1 SNAI2 PRMT3 TRAF1 ZC3H12A NFKB2 DUSP5 TNIP1 RNF19B TNF IL1B CD274 MSC EHD1 IRAK2 BCL2A1 ICAM1 TICAM1 PLAUR SPSB1 SLAMF7 PIM3 RELB PTPN1 SPHK1 PTGS2 CD44 IER3 CLCF1 PFKFB3 MAPKAPK2 SOCS3 IL1RN SLC43A3 TNFAIP8 ADORA2A DUSP2 SLAMF1 IL27 ACOD1 GPR84 ZNFX1 IL15RA GPR132 BCL3 NINJ1 AMPD3 MMP19 TNFSF9 LCP2 CD40 IL1A DHX58 ATP13A3 IL10 IL6 FOSL2 SOCS1 CCRL2 T…	8.90947e-06	#aec7e8	0.5	0	12	3.02507		176	9.601	-1.27051	Cluster 0	Regulation Of Receptor Signaling Pathway Via STAT (GO:1904892)	TGFB1 DOT1L EGF PTPRT TSLP MST1 MST1L PTPRC IL6 TP53INP2 MGAT5 PPARG HES1 JAK3 CRLF2 IL7R JAK2 IL10RA LILRB2 TNIP1 PIK3R5 TNFRSF1B BCL3 EHD1 CYTH1 SBNO2 RNF19B TRAF1 ZC3H12A HCK NFKB2 OGFR MYO9B LCP2 STX11 ARAP1 NLRC5 TGFB1 GBP2 PILRA GRAMD1A DHX58 SUN2 TNFAIP2 ADORA2A TLR8 ACSL1 NFKB1 PTPRJ FMNL1 MLLT6 NCF2 PTPRC PFKFB3 CD4 TLR2 STAT6 WIPF1 LITAF RASSF5 AMPD3 ADGRE2 HELZ2 RAPGEF1 NINJ1 STK40 LIL…	3.38354e-07	#440154	0.5	0	12	3.73531		176	9.601	-1.27051	Cluster 0	Regulation Of Receptor Signaling Pathway Via STAT (GO:1904892)	TGFB1 DOT1L EGF PTPRT TSLP MST1 MST1L PTPRC IL6 TP53INP2 MGAT5 PPARG HES1 JAK3 CRLF2 IL7R JAK2 IL10RA LILRB2 TNIP1 PIK3R5 TNFRSF1B BCL3 EHD1 CYTH1 SBNO2 RNF19B TRAF1 ZC3H12A HCK NFKB2 OGFR MYO9B LCP2 STX11 ARAP1 NLRC5 TGFB1 GBP2 PILRA GRAMD1A DHX58 SUN2 TNFAIP2 ADORA2A TLR8 ACSL1 NFKB1 PTPRJ FMNL1 MLLT6 NCF2 PTPRC PFKFB3 CD4 TLR2 STAT6 WIPF1 LITAF RASSF5 AMPD3 ADGRE2 HELZ2 RAPGEF1 NINJ1 STK40 LIL…	0.108463	#440154	0.5	0	5	0.98236
4336	9.94705	-0.731641	Cluster 10	Regulation Of Extrinsic Apoptotic Signaling Pathway (GO:2001236)	TNFRSF12A CAV1 CFLAR TMC8 TGFBR1 AGT PML IL4 BMP4 CYLD AGTR2 ITGA6 PHIP ZMYND11 TLR6 TLR4 RELA NOL3 SP100 PARK7 TNF BCL2L14 PYCARD PAK2 BCL2L12 GPER1 FADD RIPK1 STX4 WWOX TCF7L2 FEM1B G0S2 SIAH2 TRAF1 IGF1 TRAF2 LTBR FGFR1 LTB PSME3 BIRC6 SRC HTT AKR1B1 GSTP1 PELI3 BCL10 ETFA THBS1 DEDD2 SH3RF1 LGALS3 HYAL2 TNFSF12 ITGAV TNFSF10 DEPTOR BID MEN1 TNIP1 TRIM25 EHD1 MGAT1 SBNO2 BCL3 NFKB2 OGFR GRN RE…	4.32004e-09	#aec7e8	0.5	0	12	4.68226		177	8.21824	-0.639277	Cluster 0	Regulation Of Reactive Oxygen Species Biosynthetic Process (GO:1903426)	MMP8 PPARA SPHK2 RAB27A CYBA GRIN1 PIKFYVE ADGRB1 SLC25A33 TLR6 TLR4 PAGE4 UCP1 PARK7 SLC5A3 INS HSP90B2P ALOX5 CCN6 PLCG2 CD36 ABCD1 ABCD2 SLC18A2 COA8 SNCA NCF2 TLR4 TLR8 CTSS IL17RA TLR6 TLR1 ALOX5 HCK ACSL1 LYN THEMIS2 NLRC4 ARAP1 PLXNC1 SORL1 DOCK8 TLR2 CYBB RNF149 AOAH LRRK2 VNN2 MYO1F DOCK2 RASSF2 CR1 ITGAX MNDA HK3 GLT1D1 LILRB3 FPR2 SSH2 CSF2RB NFAM1 ARRB2 HCLS1 CLEC7A SIGLEC9 FGR LYST G…	2.09221e-07	#440154	0.5	0	12	3.8397		177	8.21824	-0.639277	Cluster 0	Regulation Of Reactive Oxygen Species Biosynthetic Process (GO:1903426)	MMP8 PPARA SPHK2 RAB27A CYBA GRIN1 PIKFYVE ADGRB1 SLC25A33 TLR6 TLR4 PAGE4 UCP1 PARK7 SLC5A3 INS HSP90B2P ALOX5 CCN6 PLCG2 CD36 ABCD1 ABCD2 SLC18A2 COA8 SNCA NCF2 TLR4 TLR8 CTSS IL17RA TLR6 TLR1 ALOX5 HCK ACSL1 LYN THEMIS2 NLRC4 ARAP1 PLXNC1 SORL1 DOCK8 TLR2 CYBB RNF149 AOAH LRRK2 VNN2 MYO1F DOCK2 RASSF2 CR1 ITGAX MNDA HK3 GLT1D1 LILRB3 FPR2 SSH2 CSF2RB NFAM1 ARRB2 HCLS1 CLEC7A SIGLEC9 FGR LYST G…	0.115168	#440154	0.5	0	5	0.969334
4337	10.5352	-0.37355	Cluster 10	Regulation Of Carbohydrate Catabolic Process (GO:0043470)	SCARB2 ZBTB7A TIGAR PGAM1 PRKAG2 PPP1R3B PRKAG1 SLC2A6 HIF1A JMJD8 GCK EIF6 EP300 OGT HIF1A ZDHHC5 SLC2A6 RAB35 MAPKAPK2 PRKAG2 LAMP1 TNIP1 FLII SBNO2 PLEKHM2 TFE3 TRIP10 TMEM127 WDR1 EHD1 GRN TICAM1 GRINA MGAT1 NFKB2 TRIM25 GNS SEC61A1 PLAUR PNPLA6 PI4K2A SZRD1 MYO9B PVR ATP13A3 FOSL2 FURIN IER3 SCARB2 BCL3 RELB PPP1R3B OGFR SPSB1 PSAP ISY1.RAB43 GAA SRXN1 PTPN1 FAM129B CEBPB PIM3 AKT1S1 CTSZ LR…	0.00121712	#aec7e8	0.5	0	12	1.95733		178	8.37377	-1.90622	Cluster 0	Positive Regulation Of NK T Cell Activation (GO:0051135)	IL23A IL23R IL12B IL12A IL18 RASAL3 TYK2 JAK2 RASAL3 TYK2 IL23A FMNL1 CYTH1 ARHGAP45 IL12B MYO1G ARHGAP4 HCLS1 ARHGAP30 IL10RA NLRC5 TCIRG1 PLCB2 ARHGEF1 HLA.E CCDC88B RASSF5 THEMIS2 RIN3 SH3BP1 TMC6 CYTH4 AKNA ADCY7 LYN CORO1A PTPN6 HCK LCP1 JAK2 GPSM3 STAT6 WIPF1 TAP1 WAS PIK3R5 DOCK2 LGALS9 LSP1 ADAM8 PARVG HLA.A LAPTM5 UNC13D NBEAL2 GMIP GRK2 NFKB1 PIK3CD ARAP1 DEF6 DOCK8 CD53 ARRB2 HLA.B TNF…	0.000321955	#440154	0.5	0	12	2.2461		178	8.37377	-1.90622	Cluster 0	Positive Regulation Of NK T Cell Activation (GO:0051135)	IL23A IL23R IL12B IL12A IL18 RASAL3 TYK2 JAK2 RASAL3 TYK2 IL23A FMNL1 CYTH1 ARHGAP45 IL12B MYO1G ARHGAP4 HCLS1 ARHGAP30 IL10RA NLRC5 TCIRG1 PLCB2 ARHGEF1 HLA.E CCDC88B RASSF5 THEMIS2 RIN3 SH3BP1 TMC6 CYTH4 AKNA ADCY7 LYN CORO1A PTPN6 HCK LCP1 JAK2 GPSM3 STAT6 WIPF1 TAP1 WAS PIK3R5 DOCK2 LGALS9 LSP1 ADAM8 PARVG HLA.A LAPTM5 UNC13D NBEAL2 GMIP GRK2 NFKB1 PIK3CD ARAP1 DEF6 DOCK8 CD53 ARRB2 HLA.B TNF…	0.101995	#440154	0.5	0	5	0.995711
4338	10.7634	-0.534703	Cluster 10	Positive Regulation Of Epithelial Cell Apoptotic Process (GO:1904037)	GSN PIAS4 CD40 PRKCI PLA2G1B ITGA4 CD160 THBS1 FASLG HLA-G USP17L24 ANO6 ECSCR SFRP4 RGCC IL6 GPER1 CARM1 PDCD4 PLCG1 CCL2 PLA2R1 CD40LG ARHGAP31 ANO6 LAMP1 TNIP1 TLN1 PLXND1 MAPKAPK2 EHD4 WDR1 SPSB1 MGAT1 TRIP10 TMBIM1 MYH9 EHD1 CCL2 GSN ICAM1 ZC3H12A RAPGEF1 NFKB2 PDGFB ENG SPHK1 THBS1 MSC TGFBR2 DRAM1 MMP14 NUCB1 AKAP2 ZDHHC5 PFKFB3 PLEKHM2 MAN2B1 ABCC1 RAB35 MYO1C SBNO2 ISY1.RAB43 MYO9B USP12…	0.000108024	#aec7e8	0.5	0	12	2.48324		179	8.73504	-1.11907	Cluster 0	Cellular Response To Mechanical Stimulus (GO:0071260)	MAP2K4 CASP8AP2 TMEM150C MAP3K1 MAP3K2 BAD GADD45A CRADD TNFSF14 TNFRSF10B TNFRSF10A NFKB1 TNFRSF1A IL1B MYD88 IRF1 LTBR FAS TLR8 TLR7 MAP3K14 TLR5 TLR4 KCNK4 TLR3 CD40 PIEZO1 PTGER4 BCL10 F11R SLC9A1 AQP1 CNN2 CASP8 MAPK8 CHEK1 CASP5 TNFRSF8 CASP2 PDE2A MAPK3 BNIP3 HABP4 PIEZO2 FADD SOX9 BAK1 CASP1 HCK NCF2 TLR8 LYN VASP LILRB3 LITAF TLR2 TAP1 TNFRSF1B NOD2 PRKCD LILRB2 ARAP1 THEMIS2 CTSS ITGAX …	2.09221e-07	#440154	0.5	0	12	3.8397		179	8.73504	-1.11907	Cluster 0	Cellular Response To Mechanical Stimulus (GO:0071260)	MAP2K4 CASP8AP2 TMEM150C MAP3K1 MAP3K2 BAD GADD45A CRADD TNFSF14 TNFRSF10B TNFRSF10A NFKB1 TNFRSF1A IL1B MYD88 IRF1 LTBR FAS TLR8 TLR7 MAP3K14 TLR5 TLR4 KCNK4 TLR3 CD40 PIEZO1 PTGER4 BCL10 F11R SLC9A1 AQP1 CNN2 CASP8 MAPK8 CHEK1 CASP5 TNFRSF8 CASP2 PDE2A MAPK3 BNIP3 HABP4 PIEZO2 FADD SOX9 BAK1 CASP1 HCK NCF2 TLR8 LYN VASP LILRB3 LITAF TLR2 TAP1 TNFRSF1B NOD2 PRKCD LILRB2 ARAP1 THEMIS2 CTSS ITGAX …	0.000534985	#440154	0.5	0	12	2.13583
4339	10.5871	-0.877631	Cluster 10	Negative Regulation Of Extrinsic Apoptotic Signaling Pathway (GO:2001237)	GPX1 CFLAR TGFBR1 TMBIM1 IL1A BMP5 IL1B IL4 BMP4 HSPA1A BCL2 ARHGEF2 ITGA6 PHIP ZMYND11 PF4 FAIM HSPA1B RELA RNF34 DDX3X GSK3B NOL3 CSF2 SERPINE1 TNFAIP3 PEA15 PARK7 BRCA1 TNF IFI6 TERT AKT1 RIPK1 FGA MCL1 RFFL FGB MAP2K5 TCF7L2 EYA1 EYA2 FGG NOS3 UNC5B EYA3 EYA4 SIAH2 IGF1 SCRT2 GDNF BCL2L1 SNAI2 PSME3 BIRC6 SRC HTT AKR1B1 GSTP1 PELI3 THBS1 FAIM2 ICAM1 GATA1 SH3RF1 LGALS3 HMOX1 ITGAV MAPK7 MEN1 …	3.13195e-05	#aec7e8	0.5	0	12	2.75209		180	8.68979	-0.677541	Cluster 0	Negative Regulation Of Programmed Necrotic Cell Death (GO:0062099)	CASP8 SLC25A4 NUPR1 FZD9 PELI1 ARHGEF2 YBX3 RIPK1 BIRC2 BIRC3 ARHGEF2 YBX3 EHBP1L1 PELI1 RIPK1 FAM129A MAPKAPK2 CYTH1 TNIP1 ACSL1 SBNO2 RNF19B CFLAR ARAP1 NCF2 KLF13 LYN MCL1 IL10RA PIK3R5 PPTC7 TRIM25 BCL3 STK40 LITAF HCK NFKB2 TLR8 SSH2 GBP2 FBRS ELF4 FMNL1 ELL TLR2 TNFAIP2 STX11 THEMIS2 TNFRSF1B ZC3H12A WDTC1 MYO9B CASP8 KDM6B MAP2K3 RNF149 LILRB2 IGF2R EHD1 IRF1 STAT6 SMAP2 AP5B1 ADGRE2 RAPGE…	2.96993e-08	#440154	0.5	0	12	4.26363		180	8.68979	-0.677541	Cluster 0	Negative Regulation Of Programmed Necrotic Cell Death (GO:0062099)	CASP8 SLC25A4 NUPR1 FZD9 PELI1 ARHGEF2 YBX3 RIPK1 BIRC2 BIRC3 ARHGEF2 YBX3 EHBP1L1 PELI1 RIPK1 FAM129A MAPKAPK2 CYTH1 TNIP1 ACSL1 SBNO2 RNF19B CFLAR ARAP1 NCF2 KLF13 LYN MCL1 IL10RA PIK3R5 PPTC7 TRIM25 BCL3 STK40 LITAF HCK NFKB2 TLR8 SSH2 GBP2 FBRS ELF4 FMNL1 ELL TLR2 TNFAIP2 STX11 THEMIS2 TNFRSF1B ZC3H12A WDTC1 MYO9B CASP8 KDM6B MAP2K3 RNF149 LILRB2 IGF2R EHD1 IRF1 STAT6 SMAP2 AP5B1 ADGRE2 RAPGE…	0.0267836	#440154	0.5	0	12	1.28607
4340	10.7893	-0.584837	Cluster 10	Regulation Of Response To Wounding (GO:1903034)	CADM4 IL10 STK24 TNFRSF12A PLAU SRSF6 VIL1 TNFRSF12A PLAU STK24 VIL1 SPSB1 RHOC IER3 TRIP10 NECTIN2 CHMP4B PHLDA2 S100A16 SRC IL10 SPHK1 PLCB3 LMNA ICAM1 GNA11 TJP2 PLAUR MGAT4B FAM129B TMBIM1 LGALS3BP EHD1 INF2 PVR SDC4 CLCF1 NT5E NIPAL4 FOSL1 IL27 IL1RN PLEK2 SLC39A7 LAMP1 TNIP1 CAPN2 PXDC1 ANPEP ABTB2 EPHA2 ITGA2 TAX1BP3 BCAR1 ACTN4 CD151 SERINC2 TMEM63B SLCO4A1 RRBP1 ACTN1 MISP C19ORF33 MMP14…	3.07365e-06	#aec7e8	0.5	0	12	3.25617		181	9.73701	-1.23672	Cluster 0	Cellular Response To Muramyl Dipeptide (GO:0071225)	TRIM41 VIM PTPN22 NOD1 RIPK2 NOD2 LDOC1 CHMP5 NOD2 RIPK2 NOD1 LILRB2 PILRA RNF19B HCK STX11 PTPN22 TNFRSF1B LILRB3 OSCAR DHX58 IL10RA TLR2 NCF2 VIM THEMIS2 TNIP1 NINJ1 ZC3H12A TNFAIP2 BCL3 PLAUR LILRB1 PIK3R5 LYN LAPTM5 TYMP SLAMF7 MX2 EHD1 SLC43A2 TRAF1 AOAH ADGRE2 ITGAX AP5B1 GBP2 LILRB4 CD274 PPP1R18 IL1RN C5AR1 ELF4 ICAM1 HELZ2 FGR OASL CTSS EMILIN2 GPR132 TLR8 PFKFB3 IRF5 SIGLEC9 NFKB2 AMPD3…	3.53613e-13	#440154	0.5	0	12	6.72574		181	9.73701	-1.23672	Cluster 0	Cellular Response To Muramyl Dipeptide (GO:0071225)	TRIM41 VIM PTPN22 NOD1 RIPK2 NOD2 LDOC1 CHMP5 NOD2 RIPK2 NOD1 LILRB2 PILRA RNF19B HCK STX11 PTPN22 TNFRSF1B LILRB3 OSCAR DHX58 IL10RA TLR2 NCF2 VIM THEMIS2 TNIP1 NINJ1 ZC3H12A TNFAIP2 BCL3 PLAUR LILRB1 PIK3R5 LYN LAPTM5 TYMP SLAMF7 MX2 EHD1 SLC43A2 TRAF1 AOAH ADGRE2 ITGAX AP5B1 GBP2 LILRB4 CD274 PPP1R18 IL1RN C5AR1 ELF4 ICAM1 HELZ2 FGR OASL CTSS EMILIN2 GPR132 TLR8 PFKFB3 IRF5 SIGLEC9 NFKB2 AMPD3…	0.378022	#440154	0.5	0	5	0.711241
4341	10.9419	-0.459597	Cluster 10	Regulation Of Vascular Associated Smooth Muscle Cell Proliferation (GO:1904705)	ADIPOQ MEF2D TGFB3 IL10 JUN MEF2C IGFBP5 MMP2 HTR1B FOXJ2 IGF1 MMP9 APLN ERN1 SOD2 NR4A3 BMP4 TAFA5 PPARG PDCD4 DNMT1 BMPR1A CDKN1B CDKN1A PDGFB PTEN FGF2 CNN1 P2RY6 GJA1 FGF9 EFEMP2 GPER1 MFN2 TPM1 LDLRAP1 PRKG1 MAPKAPK2 EFEMP2 ARHGAP31 ENG SPSB1 MYL9 PFKFB3 PDGFB LRP1 TIMP2 PDGFRB TRIP10 PLXND1 LAMB2 LAMP1 PLEKHM2 TNS1 ADGRA2 EHD2 PXDC1 TNIP1 EHD1 CDKN1A MMP14 ICAM1 KANK2 RRAS EPAS1 LRRC32 LAMA…	0.0186197	#aec7e8	0.5	0	12	1.36501		182	8.43618	-1.51782	Cluster 0	Regulation Of Muscle Organ Development (GO:0048634)	TGFB1 MTPN TIFAB SFMBT1 DCANP1 NEUROG1 TGFB1 TIFAB MTPN DCANP1 MYO9B GNAI2 PPP1R18 GMIP GRK2 TLN1 SH3BP1 PLCB2 ELF4 FMNL1 SPI1 WIPF1 ARHGAP45 ARAP1 MAN2B1 CSK NCKAP1L STXBP2 NEUROG1 VASP IL17RA ARHGAP30 ARRB2 EHBP1L1 WAS ARHGAP4 PIK3R5 PPP6R1 PRKCD RAPGEF1 HCK RIN3 COTL1 EFHD2 GPSM3 LAPTM5 KLF13 TYK2 ADCY7 SAMHD1 RELT TNFRSF1B APOBR THEMIS2 TCIRG1 RHOG NRROS FERMT3 ZYX RPS6KA1 MGAT1 CYTH1 SMAP2 P…	0.00135531	#440154	0.5	0	12	1.93398		182	8.43618	-1.51782	Cluster 0	Regulation Of Muscle Organ Development (GO:0048634)	TGFB1 MTPN TIFAB SFMBT1 DCANP1 NEUROG1 TGFB1 TIFAB MTPN DCANP1 MYO9B GNAI2 PPP1R18 GMIP GRK2 TLN1 SH3BP1 PLCB2 ELF4 FMNL1 SPI1 WIPF1 ARHGAP45 ARAP1 MAN2B1 CSK NCKAP1L STXBP2 NEUROG1 VASP IL17RA ARHGAP30 ARRB2 EHBP1L1 WAS ARHGAP4 PIK3R5 PPP6R1 PRKCD RAPGEF1 HCK RIN3 COTL1 EFHD2 GPSM3 LAPTM5 KLF13 TYK2 ADCY7 SAMHD1 RELT TNFRSF1B APOBR THEMIS2 TCIRG1 RHOG NRROS FERMT3 ZYX RPS6KA1 MGAT1 CYTH1 SMAP2 P…	0.00636131	#440154	0.5	0	12	1.59823
4342	10.4993	-0.964166	Cluster 10	Negative Regulation Of Transmembrane Transport (GO:0034763)	RSC1A1 IL1B IRS2 INPP5K ARL6IP5 AKT2 PRKCB THBS1 OAZ3 CTTNBP2NL INPP5K IRS2 THBS1 STX11 RSC1A1 ARL6IP5 PRKCB IL1B TLN1 FOSL2 AKT2 OAZ3 EHD1 KDM6B SIRPA NLRP3 IRAK2 IL10RA TMEM127 ELF4 PIK3R5 ZC3H12A NFKB1 PPP1R18 CAMTA2 DENND5A MYO9B CSRNP1 FBRS TNFRSF1B PFKFB3 LILRB2 RASA3 TLR2 CXCL8 SLC43A2 PTGS2 ACSL1 PLEKHM2 RNF19B TGFB1 SBNO2 RASSF5 TLR4 IL1A FMNL1 CTTNBP2NL NFKBIZ ELL WDTC1 PPP1R15A TNIP1 N…	0.000842846	#aec7e8	0.5	0	12	2.03713		183	7.85628	-0.246943	Cluster 0	Regulation Of Morphogenesis Of A Branching Structure (GO:0060688)	RTN4 GDNF LRRK2 SIX2 FGFR2 RTN4 SIX2 GDNF FGFR2 LRRK2 KCTD16 WDFY3 SMCHD1 RP11.768G7.1 LCMT2 SEMA6C KIF1B FRY SPATA20P1 LYST APLP1 MEGF9 SORL1 ZBTB46 KIAA1109 OGFRL1 CDK5R1 CR1 BOD1L1 LINC00634 IGF2R TMEM154 AK5 SYNE1 PPP3R1 ARHGAP26 VNN2 PLXNC1 TLR1 LHFPL4 SNCA MXD1 ZBTB18 MTURN ARHGAP21 SSH2 QKI RNF11 MNDA DKK3 MAP1A NCAM1 MTND5P24 GNAO1 LPAR1 KCNMA1 SECISBP2L SEPT3 GCA FAM168A BACE1 DCLK1 FAM1…	0.00261595	#440154	0.5	0	12	1.79119		183	7.85628	-0.246943	Cluster 0	Regulation Of Morphogenesis Of A Branching Structure (GO:0060688)	RTN4 GDNF LRRK2 SIX2 FGFR2 RTN4 SIX2 GDNF FGFR2 LRRK2 KCTD16 WDFY3 SMCHD1 RP11.768G7.1 LCMT2 SEMA6C KIF1B FRY SPATA20P1 LYST APLP1 MEGF9 SORL1 ZBTB46 KIAA1109 OGFRL1 CDK5R1 CR1 BOD1L1 LINC00634 IGF2R TMEM154 AK5 SYNE1 PPP3R1 ARHGAP26 VNN2 PLXNC1 TLR1 LHFPL4 SNCA MXD1 ZBTB18 MTURN ARHGAP21 SSH2 QKI RNF11 MNDA DKK3 MAP1A NCAM1 MTND5P24 GNAO1 LPAR1 KCNMA1 SECISBP2L SEPT3 GCA FAM168A BACE1 DCLK1 FAM1…	0.171587	#440154	0.5	0	5	0.882757
4343	10.7501	-0.610984	Cluster 10	Regulation Of Endothelial Cell Apoptotic Process (GO:2000351)	IL11 FGB IL10 PRKCI FGG ITGA4 ANGPT1 PDPK1 CD160 IL13 HLA-G ANO6 IL4 RGCC TNIP2 TEK PDCD4 CD40LG GAS6 RAMP2 NFE2L2 CD40 SEMA5A SERPINE1 TNFAIP3 NDNF THBS1 TNF FASLG GATA3 GATA2 ICAM1 ECSCR CDH5 GPER1 KDR KRIT1 PLCG1 CCL2 PAK4 MAPK7 FGA MEN1 ICAM1 PLXND1 TNIP1 SPSB1 PDGFB EHD1 ARHGAP31 LAMP1 TRIP10 ZC3H12A SPHK1 MAPKAPK2 TGFBR2 AKAP2 NECTIN2 IER3 SOCS3 MMP19 MGAT1 PFKFB3 NFKB2 DRAM1 PXDC1 CDH5 TRA…	0.033409	#aec7e8	0.5	0	12	1.23807		184	8.75088	-1.71402	Cluster 0	Regulation Of Monocyte Differentiation (GO:0045655)	APCS IL34 CD74 CSF1 CTNNBIP1 ZFP36L1 FOXP1 FES CD4 CDK6 DCSTAMP MYC IRF7 HOXA7 HLA-DRB1 LGALS9 LAPTM5 MGAT1 MAN2B1 CD4 CD74 FES HLA.DRB1 SLC15A3 CSF1 IRF7 LSP1 TCIRG1 IRF5 FERMT3 PTPN6 NCKAP1L RIN3 CYTH4 CYBA GRN CD68 RPS6KA1 EMILIN2 PLEKHO2 TNFRSF14 RAC2 FCGRT PARP10 HCLS1 CD53 ARHGAP4 CTSZ HLA.A SPI1 PIK3AP1 NRROS MYO9B TYMP OSCAR PIK3R5 PARVG UNC93B1 TNFRSF1B UBA7 GNAI2 STAT6 GM2A SIPA1 CAPG T…	0.000674293	#440154	0.5	0	12	2.08558		184	8.75088	-1.71402	Cluster 0	Regulation Of Monocyte Differentiation (GO:0045655)	APCS IL34 CD74 CSF1 CTNNBIP1 ZFP36L1 FOXP1 FES CD4 CDK6 DCSTAMP MYC IRF7 HOXA7 HLA-DRB1 LGALS9 LAPTM5 MGAT1 MAN2B1 CD4 CD74 FES HLA.DRB1 SLC15A3 CSF1 IRF7 LSP1 TCIRG1 IRF5 FERMT3 PTPN6 NCKAP1L RIN3 CYTH4 CYBA GRN CD68 RPS6KA1 EMILIN2 PLEKHO2 TNFRSF14 RAC2 FCGRT PARP10 HCLS1 CD53 ARHGAP4 CTSZ HLA.A SPI1 PIK3AP1 NRROS MYO9B TYMP OSCAR PIK3R5 PARVG UNC93B1 TNFRSF1B UBA7 GNAI2 STAT6 GM2A SIPA1 CAPG T…	0.0564699	#440154	0.5	0	5	1.12409
4344	10.974	-0.407962	Cluster 10	Regulation Of Vascular Associated Smooth Muscle Cell Migration (GO:1904752)	DOCK7 NR4A3 ADIPOQ BMP4 DOCK5 DOCK4 MEF2C FGF9 IGFBP5 TPM1 PDGFB PRKG1 DOCK4 PDGFB PRKG1 LAMA4 TPM1 NR4A3 TNS1 MEF2C FZD4 EPAS1 FHL1 SAMD4A KIAA1462 ARHGAP31 IGFBP5 DDR2 PHLDB1 PFKFB3 CRIM1 LRP1 SVIL EHD2 SASH1 DOCK7 GSN PARVA AC013461.1 SORBS1 PALMD TLN2 WDFY3 MYL9 KANK2 ANO6 FNDC3B PDE4DIP SYNPO LAMB2 RHOQ BMPR2 LRRC32 SPTBN1 HSPB6 VWF TPM2 GPD1 MRAS MCAM PTPRM ADIPOQ BMP4 LAMC1 KIF13A PDGFRB A…	0.126928	#aec7e8	0.5	0	5	0.948222		185	9.33176	-1.4743	Cluster 0	Regulation Of Monocyte Chemotactic Protein-1 Production (GO:0071637)	IL1B C1QTNF3 CD84 CLEC7A SYK OAS3 GSTP1 TWIST1 OAS1 LGALS9 APOD LGALS9 OAS1 MX2 OAS2 HCK TLR2 NCF2 LILRB2 LAPTM5 LYN CTSS CCR1 SLC15A3 PILRA PIK3R5 TNFRSF1B ITGAX THEMIS2 MX1 OAS3 PLEKHO2 SIGLEC9 TYMP CMPK2 OSCAR SPI1 PIK3AP1 SYK NOD2 CYBB TLR8 PRKCD CLEC7A EMILIN2 ADGRE2 MAN2B1 NCKAP1L LILRB3 SIGLEC1 LILRB1 STX11 CYTH4 IFIT3 ARAP1 HCLS1 MPEG1 C5AR1 TAP1 UNC93B1 TCIRG1 PARP10 AOAH CD68 IL10RA APO…	6.41738e-10	#440154	0.5	0	12	5.09632		185	9.33176	-1.4743	Cluster 0	Regulation Of Monocyte Chemotactic Protein-1 Production (GO:0071637)	IL1B C1QTNF3 CD84 CLEC7A SYK OAS3 GSTP1 TWIST1 OAS1 LGALS9 APOD LGALS9 OAS1 MX2 OAS2 HCK TLR2 NCF2 LILRB2 LAPTM5 LYN CTSS CCR1 SLC15A3 PILRA PIK3R5 TNFRSF1B ITGAX THEMIS2 MX1 OAS3 PLEKHO2 SIGLEC9 TYMP CMPK2 OSCAR SPI1 PIK3AP1 SYK NOD2 CYBB TLR8 PRKCD CLEC7A EMILIN2 ADGRE2 MAN2B1 NCKAP1L LILRB3 SIGLEC1 LILRB1 STX11 CYTH4 IFIT3 ARAP1 HCLS1 MPEG1 C5AR1 TAP1 UNC93B1 TCIRG1 PARP10 AOAH CD68 IL10RA APO…	0.0127778	#440154	0.5	0	12	1.44677
4345	10.7975	-1.08912	Cluster 10	Regulation Of Endothelial Cell Development (GO:1901550)	IL1B PPP1R12A ROCK1 ROCK2 ZDHHC21 TNF TNFRSF1A VCL IL1B TNF ROCK1 CXCL3 ROCK2 SERPINB2 PTGS2 IRAK2 SOD2 PPP1R12A VCL PLAUR ATP13A3 CXCL8 IER3 USP12 SOCS3 ZC3H12A PFKFB3 EHD1 GPR84 RNF19B ICAM1 AMPD3 BACH1 NFKB1 DSE TLN1 MMP19 TNIP1 TRAF1 SRC TLR2 IL1A DENND5A FNDC3B TNFRSF1A ANO6 LILRB2 ADORA2A ACSL1 ARHGAP31 CCRL2 IL1RN ZDHHC21 DDX60L IGF2R STX11 SPHK1 DRAM1 TNFAIP2 IL6 B4GALT5 TLR4 LACTB FOSL2 …	6.83856e-14	#aec7e8	0.5	0	12	7.08252		186	7.895	-2.00592	Cluster 0	Negative Regulation Of p38MAPK Cascade (GO:1903753)	DLG1 DUSP10 DUSP1 PTPN22 EZR TREM2 DUSP10 PTPN22 EZR DUSP1 KLF6 STK17B NFKBIA RGS1 TREM2 DLG1 TNFAIP3 PPP1R15A TSC22D3 CD69 FOS TOB1 CXCR4 CAPG CD84 LPXN NFKBIZ BTG1 PTGER4 ZFP36 SYTL3 AMFR ACP5 LAPTM5 RHOH IL4I1 TIPARP CYTIP GM2A ELF1 IFI30 SUSD6 KLRB1 DAZAP2 CLK1 NR3C1 PRDM1 MPZL3 ACTR3 SAMSN1 AIM1 SQRDL CD53 DOCK10 NCKAP1L IL2RG ANXA1 CTSZ OSBPL3 RAB7B CSRNP1 RGCC SLC15A3 CCR6 RNF19A CTSD IL7R…	2.96993e-08	#440154	0.5	0	12	4.26363		186	7.895	-2.00592	Cluster 0	Negative Regulation Of p38MAPK Cascade (GO:1903753)	DLG1 DUSP10 DUSP1 PTPN22 EZR TREM2 DUSP10 PTPN22 EZR DUSP1 KLF6 STK17B NFKBIA RGS1 TREM2 DLG1 TNFAIP3 PPP1R15A TSC22D3 CD69 FOS TOB1 CXCR4 CAPG CD84 LPXN NFKBIZ BTG1 PTGER4 ZFP36 SYTL3 AMFR ACP5 LAPTM5 RHOH IL4I1 TIPARP CYTIP GM2A ELF1 IFI30 SUSD6 KLRB1 DAZAP2 CLK1 NR3C1 PRDM1 MPZL3 ACTR3 SAMSN1 AIM1 SQRDL CD53 DOCK10 NCKAP1L IL2RG ANXA1 CTSZ OSBPL3 RAB7B CSRNP1 RGCC SLC15A3 CCR6 RNF19A CTSD IL7R…	0.257333	#440154	0.5	0	5	0.794752
4346	10.6854	-0.529278	Cluster 10	Negative Regulation Of Nitric Oxide Biosynthetic Process (GO:0045019)	KHSRP PTGIS ZC3H12A ROCK2 CAV1 SIRPA GLA LAMP1 SIRPA ZC3H12A PLEKHM2 TNIP1 SPHK1 PLAUR CTSZ RAB35 MGAT1 SRC ICAM1 CHMP4B ZDHHC5 MAPKAPK2 TRIP10 GRN EHD1 IER3 PFKFB3 MMP14 ARHGEF11 SDF4 WDR1 TFE3 METRNL MAN2B1 CEBPB SBNO2 TICAM1 CD68 TPM4 ACTN1 CAV1 GLA NFKB2 GRINA SLC15A3 MMP19 NUCB1 DRAM1 SNX9 BCL3 MYO9B ABCC1 OGFR FAM129B CTSB TNS3 B4GALT5 GPR84 RAB5C TLN1 MSC LMNA LRP1 SZRD1 LRRC59 LGALS1 PXDC…	7.81735e-09	#aec7e8	0.5	0	12	4.55347		187	8.76095	-1.69138	Cluster 0	Positive Regulation Of Activation Of Janus Kinase Activity (GO:0010536)	IL23A IL23R CCL5 IL12B IL6R GH1 IL23A IL12B CCL5 IL6R GH1 NFKB1 IL23R TLR8 LGR6 RNF19B NAIF1 TNFRSF1B RASSF5 PILRA IL10RA GBP2 RP11.613M10.9 PIK3R5 ADORA2A CST7 HCK NCF2 TRAF1 SIRPB1 LILRB2 CYTH4 HLA.E LYN LITAF SELPLG HCLS1 LCP2 SLC43A2 SAMSN1 CD53 JAML PTGS2 TLR6 APOBR CD274 CD8A IL2RG NINJ1 TNFAIP2 SMAP2 AQP9 LSP1 IL7R B2M PPP1R18 TRAC TLR2 LILRB3 PTPRC CCR5 PTAFR TNIP1 L34079.2 SLAMF7 ITGAX T…	9.62495e-08	#440154	0.5	0	12	4.0083		187	8.76095	-1.69138	Cluster 0	Positive Regulation Of Activation Of Janus Kinase Activity (GO:0010536)	IL23A IL23R CCL5 IL12B IL6R GH1 IL23A IL12B CCL5 IL6R GH1 NFKB1 IL23R TLR8 LGR6 RNF19B NAIF1 TNFRSF1B RASSF5 PILRA IL10RA GBP2 RP11.613M10.9 PIK3R5 ADORA2A CST7 HCK NCF2 TRAF1 SIRPB1 LILRB2 CYTH4 HLA.E LYN LITAF SELPLG HCLS1 LCP2 SLC43A2 SAMSN1 CD53 JAML PTGS2 TLR6 APOBR CD274 CD8A IL2RG NINJ1 TNFAIP2 SMAP2 AQP9 LSP1 IL7R B2M PPP1R18 TRAC TLR2 LILRB3 PTPRC CCR5 PTAFR TNIP1 L34079.2 SLAMF7 ITGAX T…	0.000939529	#440154	0.5	0	12	2.01354
4347	10.1596	-0.701734	Cluster 10	Regulation Of Apoptotic Signaling Pathway (GO:2001233)	DAPK2 CSNK2A2 CSNK2A1 BDNF CRADD TRAF1 QARS1 TGFBR1 DAB2IP TPD52L1 MAPK8IP2 TMBIM1 NR4A2 CYLD PPIA TRAF7 FAS BCL2 TMBIM6 TRIM39 GRINA RB1 MAZ SGMS1 CX3CR1 ETFA TNF FAIM2 GATA4 CTSV CX3CL1 CTSS STYXL1 ING5 BCL2L14 PYCARD BCL2L12 PTPMT1 CTSL CTSK NKX3-1 IFNB1 CTSH RPS3 DEPTOR GRINA PLEKHM2 TNIP1 GRN MGAT1 CTSZ OGFR SLC15A3 MAN2B1 LAMP1 NFKB2 EHD1 CHMP4B NINJ1 TRAF1 PSAP CD68 SQRDL MAPKAPK2 SIRPA RA…	1.14708e-05	#aec7e8	0.5	0	12	2.9702		188	8.16265	-0.838475	Cluster 0	Complement Receptor Mediated Signaling Pathway (GO:0002430)	CR1 GPLD1 GPR32P1 C5AR1 GPR33 C5AR2 FPR2 FPR1 GPR32 FPR3 CMKLR1 C5AR1 NCF2 FPR2 HCK LILRB3 TLR8 ITGAX TLR2 LRRC25 SIGLEC9 NFAM1 LILRA6 FPR1 PTAFR SPI1 CSF2RB MYO1F PILRA ARRB2 CTSS CCR1 TNFRSF10C P2RY13 VNN2 CLEC7A APOBR CXCR2 CEACAM3 THEMIS2 SLC11A1 GLT1D1 PLEKHO2 LYN AQP9 CXCR1 CLEC4E SIGLEC5 IL17RA RASGRP4 ADGRE2 SIRPB1 CYTH4 LILRA2 FGR NCF1B SIRPB2 TLR4 EVI2B FFAR2 MXD1 OSCAR NPL MNDA C10ORF5…	1.05519e-08	#440154	0.5	0	12	4.48833		188	8.16265	-0.838475	Cluster 0	Complement Receptor Mediated Signaling Pathway (GO:0002430)	CR1 GPLD1 GPR32P1 C5AR1 GPR33 C5AR2 FPR2 FPR1 GPR32 FPR3 CMKLR1 C5AR1 NCF2 FPR2 HCK LILRB3 TLR8 ITGAX TLR2 LRRC25 SIGLEC9 NFAM1 LILRA6 FPR1 PTAFR SPI1 CSF2RB MYO1F PILRA ARRB2 CTSS CCR1 TNFRSF10C P2RY13 VNN2 CLEC7A APOBR CXCR2 CEACAM3 THEMIS2 SLC11A1 GLT1D1 PLEKHO2 LYN AQP9 CXCR1 CLEC4E SIGLEC5 IL17RA RASGRP4 ADGRE2 SIRPB1 CYTH4 LILRA2 FGR NCF1B SIRPB2 TLR4 EVI2B FFAR2 MXD1 OSCAR NPL MNDA C10ORF5…	0.00303592	#440154	0.5	0	12	1.75885
4348	10.9018	-1.17961	Cluster 10	Regulation Of Astrocyte Differentiation (GO:0048710)	NOTCH1 BMP2 IL6 NOG SERPINE2 ID2 CLCF1 F2 HES1 EPHA4 HES5 IL6 CLCF1 BMP2 HES5 HES1 SERPINE2 ID2 EPHA4 IL27 ICAM1 NOG ZC3H12A PXDC1 IER3 TNF PTGS2 IL10 ACOD1 CSF3 NOTCH1 SPSB1 SOCS3 PTX3 ABTB2 F2 OASL RNF19B SPHK1 TRAF1 NIPAL4 IL1RN CCL3L3 PFKFB3 SLAMF7 DRAM1 PLAUR SOD2 IL1B MMP19 CXCL2 TMEM2 AMBP JUN SERPINB2 C2 NINJ1 CXCL3 ATF3 CD274 SRC IRAK2 ADORA2A SOX2 TNIP3 PROC RND1 EHD1 FFAR3 SOX9 DHX58 M…	0.000289208	#aec7e8	0.5	0	12	2.26939		189	7.89229	-0.293901	Cluster 0	Constitutive Heterochromatin Formation (GO:0140719)	CENPV HELLS SMCHD1 SIRT6 SIRT2 EZH1 EZH2 INSL6 EZH2 EZH1 CENPV INSL6 HELLS SIRT6 SIRT2 SMCHD1 MMS22L ZNF519 EPB41 LRRK2 XRCC2 CROCCP2 GINS4 KIAA1551 MCM6 MEFV SSH2 ANKRD44 SLC25A37 ZNF221 FAM65B RPL17P37 KLF12 ZNF551 PHIP TMEM154 PTPRC LUC7L HELB CHD7 SAA3P SPATA20P1 LYST AL365202.1 ATAD5 ZCCHC11 MKRN1 USP15 ZNF471 TIMELESS SPC24 DOCK8 SYNE2 CHD1 NLRP12 TIGD1 H3F3A EFCAB3 RP1.76C18.1 MTND5P24 HSP…	0.0196235	#440154	0.5	0	12	1.35361		189	7.89229	-0.293901	Cluster 0	Constitutive Heterochromatin Formation (GO:0140719)	CENPV HELLS SMCHD1 SIRT6 SIRT2 EZH1 EZH2 INSL6 EZH2 EZH1 CENPV INSL6 HELLS SIRT6 SIRT2 SMCHD1 MMS22L ZNF519 EPB41 LRRK2 XRCC2 CROCCP2 GINS4 KIAA1551 MCM6 MEFV SSH2 ANKRD44 SLC25A37 ZNF221 FAM65B RPL17P37 KLF12 ZNF551 PHIP TMEM154 PTPRC LUC7L HELB CHD7 SAA3P SPATA20P1 LYST AL365202.1 ATAD5 ZCCHC11 MKRN1 USP15 ZNF471 TIMELESS SPC24 DOCK8 SYNE2 CHD1 NLRP12 TIGD1 H3F3A EFCAB3 RP1.76C18.1 MTND5P24 HSP…	0.0449999	#440154	0.5	0	12	1.17339
4349	10.6646	-1.18718	Cluster 10	Regulation Of Vascular Associated Smooth Muscle Cell Apoptotic Process (GO:1905459)	MFN2 PPARG E2F3 PDCD4 IGF1 SOD2 SOD2 IGF1 PPARG E2F3 MFN2 ACSL1 RNF19B PDCD4 TNIP1 TNFAIP2 ZC3H12A PFKFB3 TRIP10 MAPKAPK2 CCRL2 USP12 NFKB2 ICAM1 FEM1A SPSB1 IL1RN IRAK2 N4BP1 NFKB1 EHD1 AMPD3 APOL6 G0S2 SLAMF7 SOCS3 MMP19 TRAF1 BCL3 TRIM25 FAM129A NINJ1 CEBPB WI2.1896O14.1 ACOD1 STK40 CD274 TTL IL27 RETSAT TICAM1 PDE4DIP GPR84 SQRDL IBA57 MOB3C SBNO2 CFLAR MFN1 ATF6 RHOQ LILRB2 PTGS2 ADORA2A AQP…	2.35942e-07	#aec7e8	0.5	0	12	3.8136		190	8.32086	-1.74318	Cluster 0	Regulation Of miRNA Metabolic Process (GO:2000628)	TGFB1 SMAD3 RELA DDX5 RC3H1 RC3H2 HRAS NFKB1 NFKB1 TGFB1 SMAD3 ELF4 NFKB2 CYTH1 MYO9B RC3H2 PPP1R18 TLN1 FMNL1 PIK3R5 SBNO2 RELA MYH9 TRAPPC10 TNIP1 EHBP1L1 MSN STAT6 TRIM25 ARHGEF1 NLRC5 RELB MAPKAPK2 FBRS VASP RASA3 KLF13 RC3H1 RASSF5 KDM2A TNFRSF1B KDM6B GMIP GNAI2 RAPGEF1 ARAP1 ARHGEF2 ZC3H12A ARHGAP45 MCL1 EHD1 ARHGAP30 AKNA SUN2 MYO1G ISY1.RAB43 WIPF1 CHPF2 RIN3 HRAS ABCC1 PACS1 CDC42SE1 IL…	0.000451491	#440154	0.5	0	12	2.17268		190	8.32086	-1.74318	Cluster 0	Regulation Of miRNA Metabolic Process (GO:2000628)	TGFB1 SMAD3 RELA DDX5 RC3H1 RC3H2 HRAS NFKB1 NFKB1 TGFB1 SMAD3 ELF4 NFKB2 CYTH1 MYO9B RC3H2 PPP1R18 TLN1 FMNL1 PIK3R5 SBNO2 RELA MYH9 TRAPPC10 TNIP1 EHBP1L1 MSN STAT6 TRIM25 ARHGEF1 NLRC5 RELB MAPKAPK2 FBRS VASP RASA3 KLF13 RC3H1 RASSF5 KDM2A TNFRSF1B KDM6B GMIP GNAI2 RAPGEF1 ARAP1 ARHGEF2 ZC3H12A ARHGAP45 MCL1 EHD1 ARHGAP30 AKNA SUN2 MYO1G ISY1.RAB43 WIPF1 CHPF2 RIN3 HRAS ABCC1 PACS1 CDC42SE1 IL…	0.084022	#440154	0.5	0	5	1.0378
4350	10.7512	-1.00435	Cluster 10	Positive Regulation Of Nitric-Oxide Synthase Activity (GO:0051000)	GCH1 S100A1 NPR3 NUS1P3 TNF HTR2B TERF2 HIF1A INS DHFR NOS1AP PIK3CB TERT AKT1 APOE SCARB1 FCER2 SCARB1 TNIP1 TNF PLEKHM2 GRINA LAMP1 NFKB2 MAPKAPK2 TRAF1 GCH1 MSC PFKFB3 SRC AKT1 ICAM1 APOE ZC3H12A PIM3 DOT1L TICAM1 ABCD1 TNFSF9 GRAMD1A CHMP4B TRIP10 GAA ARHGEF11 RNF19B CD40 OGFR CTSZ PIK3CB NAGLU SPHK1 IER3 C17ORF96 MYO9B EHD1 ABTB2 NOP9 TRIM25 RAB35 MAN2B1 SLAMF7 CH507.9B2.1 MAFG USF2 MMP19 NF…	4.13639e-05	#aec7e8	0.5	0	12	2.69169		191	8.48072	-1.35504	Cluster 0	Positive Regulation Of Adaptive Immune Response Based On Somatic Recombination Of Immune Receptors Built From Immunoglobulin Superfamily Domains (GO:0002824)	CCR2 SLC11A1 IL23R ZBTB1 TYK2 IL1B CLEC7A IL23A NLRP10 CLEC6A IL12B PRKCQ IL12RB1 JAK2 TLR8 HCK NCF2 TLR2 LYN THEMIS2 CTSS ITGAX LILRB2 AOAH FMNL1 CLEC7A PIK3R5 TNFRSF1B LILRB3 FGR HCLS1 ARRB2 PTAFR MYO1F SLC11A1 PILRA ARHGAP30 IL10RA NOD2 CYTH4 MPEG1 LCP1 CSF2RB ADGRE2 STX11 SIGLEC9 IL17RA HLA.E EVI2B APOBR C5AR1 ADAM8 RASSF5 PLCB2 LAPTM5 ARAP1 WIPF1 SMAP2 NFAM1 DOCK8 IL6R LILRA6 WAS CFP LILRA1 …	3.69082e-09	#440154	0.5	0	12	4.71644		191	8.48072	-1.35504	Cluster 0	Positive Regulation Of Adaptive Immune Response Based On Somatic Recombination Of Immune Receptors Built From Immunoglobulin Superfamily Domains (GO:0002824)	CCR2 SLC11A1 IL23R ZBTB1 TYK2 IL1B CLEC7A IL23A NLRP10 CLEC6A IL12B PRKCQ IL12RB1 JAK2 TLR8 HCK NCF2 TLR2 LYN THEMIS2 CTSS ITGAX LILRB2 AOAH FMNL1 CLEC7A PIK3R5 TNFRSF1B LILRB3 FGR HCLS1 ARRB2 PTAFR MYO1F SLC11A1 PILRA ARHGAP30 IL10RA NOD2 CYTH4 MPEG1 LCP1 CSF2RB ADGRE2 STX11 SIGLEC9 IL17RA HLA.E EVI2B APOBR C5AR1 ADAM8 RASSF5 PLCB2 LAPTM5 ARAP1 WIPF1 SMAP2 NFAM1 DOCK8 IL6R LILRA6 WAS CFP LILRA1 …	0.122109	#440154	0.5	0	5	0.956626
4351	9.70121	-0.567975	Cluster 10	Negative Regulation Of Cysteine-Type Endopeptidase Activity (GO:2000117)	GPX1 CARD8 MT3 DHCR24 VEGFA PAX2 DPEP1 GAS6 NAIP RAF1 DDX3X TNF IFI6 CSN2 AQP1 DNAJB6 IFI16 LAMP3 MAGEA3 SNCA FNIP1 USP47 MAP2K5 IGBP1 CAST CDKN2D CSNK2A1 PCID2 SIAH2 HGF KLF4 XIAP CARD18 AVP CARD16 LTF LAMTOR5 CD44 FABP1 SRC ARL6IP1 THBS1 TRIAP1 CST7 SH3RF1 CST5 CST4 CST3 CST2 CST1 RPS6KA1 RPS6KA3 SFN TMBIM1 SQRDL GRN MGAT1 CST3 TNIP1 IFNGR2 EHD1 TMEM127 MVP BCL3 STX11 FOSL2 TLR2 TAP1 ELF4 HCK R…	6.1569e-09	#aec7e8	0.5	0	12	4.60532		192	7.90543	-0.268623	Cluster 0	Positive Regulation Of Adipose Tissue Development (GO:1904179)	NCOA2 NCOA1 PPARG SORL1 SIRT1 PRKAA1 TRPM4 NCOA1 SORL1 NCOA2 SSH2 PRKAA1 SMCHD1 PPARG LRRK2 PTPRC DOCK8 SIRT1 FAM65B IGF2R TMEM154 CR1 LYST ATM MXD1 FAM129A KIAA1551 KDM7A CFLAR AKAP13 ARHGAP26 SLC12A6 TLR1 MARCH8 RNF149 EPB41 TCP11L2 PCNX1 TRANK1 RNF213 UTRN STK4 TLR6 STEAP4 TLR8 PLXNC1 TRPM4 FYB MKRN1 NAMPT FGL2 DOCK11 VNN2 SLC25A37 TLR4 GVINP1 TTL MAP3K2 PTPRJ WDR26 TEP1 USP15 OGFRL1 KIAA0430 …	1.39246e-06	#440154	0.5	0	12	3.42811		192	7.90543	-0.268623	Cluster 0	Positive Regulation Of Adipose Tissue Development (GO:1904179)	NCOA2 NCOA1 PPARG SORL1 SIRT1 PRKAA1 TRPM4 NCOA1 SORL1 NCOA2 SSH2 PRKAA1 SMCHD1 PPARG LRRK2 PTPRC DOCK8 SIRT1 FAM65B IGF2R TMEM154 CR1 LYST ATM MXD1 FAM129A KIAA1551 KDM7A CFLAR AKAP13 ARHGAP26 SLC12A6 TLR1 MARCH8 RNF149 EPB41 TCP11L2 PCNX1 TRANK1 RNF213 UTRN STK4 TLR6 STEAP4 TLR8 PLXNC1 TRPM4 FYB MKRN1 NAMPT FGL2 DOCK11 VNN2 SLC25A37 TLR4 GVINP1 TTL MAP3K2 PTPRJ WDR26 TEP1 USP15 OGFRL1 KIAA0430 …	0.0897741	#440154	0.5	0	5	1.02342
4352	10.7748	-1.26154	Cluster 10	Intracellular Oxygen Homeostasis (GO:0032364)	EGLN1 WNT7B HIF1A CIAO3 SOD2 SOD2 HIF1A EGLN1 WNT7B TNFAIP2 RNF19B PFKFB3 HMGN5 TNIP1 PTGS2 AMPD3 ZC3H12A ICAM1 CD274 IL1RN IRAK2 DENND5A SOCS3 SLAMF7 ACOD1 FOSL2 IL27 ACSL1 MLNR PLAUR IER3 NAMPT CCRL2 AQP9 NIPAL4 BCL3 B4GALT5 IL10 LACTB ADGRE2 OASL MMP19 CXCL8 NINJ1 HELZ2 EHD1 TNF LILRB2 NFKB1 GPR84 TRAF1 NFKB2 SPHK1 SBNO2 OGFRL1 DDX60L CEBPB GBP1 TLR4 ATP13A3 BACH1 SPSB1 IL6 ABTB2 SQRDL GBP2 IL…	3.9298e-08	#aec7e8	0.5	0	12	4.20282		193	9.12396	-2.02086	Cluster 0	Positive Regulation Of Alpha-Beta T Cell Activation (GO:0046635)	SYK IL23R EBI3 IHH HLA-A HLA-E NKAP GLI3 HSPH1 PNP SHH IL23A TNFSF4 HLA-DRA IL12B IL12A HLA-DRB3 CD55 HLA-DRB1 IL12B IL23A EBI3 TNFSF4 NFKB1 PNP CD80 CD40 CD83 TRAF1 IL12A SYK CCL22 CD55 IL23R PIK3AP1 SHH CD274 TNIP1 TNFSF9 LAMP3 IRF5 ADORA2A IL4I1 IHH LILRB1 NFKB2 BTK NKAP TSPAN33 RNF19B SLAMF7 LYN CYTIP PSTPIP2 SLC43A2 MYO1G MAP3K8 SAMSN1 DAPP1 MSC NFKBIE ZC3H12A PTGS2 GPR132 HPSE STX11 NFKBIA …	5.2921e-12	#440154	0.5	0	12	6.13819		193	9.12396	-2.02086	Cluster 0	Positive Regulation Of Alpha-Beta T Cell Activation (GO:0046635)	SYK IL23R EBI3 IHH HLA-A HLA-E NKAP GLI3 HSPH1 PNP SHH IL23A TNFSF4 HLA-DRA IL12B IL12A HLA-DRB3 CD55 HLA-DRB1 IL12B IL23A EBI3 TNFSF4 NFKB1 PNP CD80 CD40 CD83 TRAF1 IL12A SYK CCL22 CD55 IL23R PIK3AP1 SHH CD274 TNIP1 TNFSF9 LAMP3 IRF5 ADORA2A IL4I1 IHH LILRB1 NFKB2 BTK NKAP TSPAN33 RNF19B SLAMF7 LYN CYTIP PSTPIP2 SLC43A2 MYO1G MAP3K8 SAMSN1 DAPP1 MSC NFKBIE ZC3H12A PTGS2 GPR132 HPSE STX11 NFKBIA …	0.0296902	#440154	0.5	0	12	1.26369
4353	10.7372	-1.32575	Cluster 10	Negative Regulation Of Tyrosine Phosphorylation Of STAT Protein (GO:0042532)	SOCS3 PTPN2 SOCS1 OCRL PIBF1 PPP2R1A SH2B3 PPP2CA PARP14 SOCS3 SOCS1 SLAMF7 ICAM1 TRAF1 RNF19B IL27 IL1RN CD274 EHD1 ACOD1 ZC3H12A DHX58 TNIP1 CD40 PFKFB3 NFKB2 OASL PARP14 MMP19 TNF IL10 BCL3 PLAUR AMPD3 LILRB2 SIGLEC1 NIPAL4 HELZ2 NFKB1 TNFAIP2 SOD2 MSC PTPN1 NINJ1 LILRB4 SLC2A6 SLAMF1 ADORA2A CCR5 CCRL2 IFIT3 RELB GPR84 PTGS2 IFIH1 GPR132 TICAM1 FFAR3 PIM3 NEURL3 CMPK2 SPHK1 GRAMD1A TNFRSF1B D…	3.9298e-08	#aec7e8	0.5	0	12	4.20282		194	8.14386	-0.683633	Cluster 0	Negative Regulation Of Peptidyl-Serine Phosphorylation (GO:0033137)	DMTN NLRP2B PAQR3 GADD45A PDE4D PTEN SMAD7 DKK1 PPM1F CNKSR3 RASSF2 MLXIPL GPD1L INPP5K DMD INPP5J RACK1 NCK1 NCK2 GPD1L INPP5K WDTC1 DMTN PPM1F FOXO4 R3HDM4 YPEL3 ABTB1 STK40 RASSF2 DYSF PDE4D C10ORF54 MAP3K3 RXRA NCOA4 TMEM127 FAM129A FKBP8 SSH2 EHBP1L1 TNFRSF10C ITM2B NCK2 MYO1F SMAD7 KLF13 SUN2 PRKACA NFAM1 IQSEC1 FMNL1 DMD ZDHHC18 WBP2 BCL6 CTDSP1 PPP1R12B ZER1 ARAP1 LRP10 TECPR2 SVIL GADD45…	0.00185517	#440154	0.5	0	12	1.86581		194	8.14386	-0.683633	Cluster 0	Negative Regulation Of Peptidyl-Serine Phosphorylation (GO:0033137)	DMTN NLRP2B PAQR3 GADD45A PDE4D PTEN SMAD7 DKK1 PPM1F CNKSR3 RASSF2 MLXIPL GPD1L INPP5K DMD INPP5J RACK1 NCK1 NCK2 GPD1L INPP5K WDTC1 DMTN PPM1F FOXO4 R3HDM4 YPEL3 ABTB1 STK40 RASSF2 DYSF PDE4D C10ORF54 MAP3K3 RXRA NCOA4 TMEM127 FAM129A FKBP8 SSH2 EHBP1L1 TNFRSF10C ITM2B NCK2 MYO1F SMAD7 KLF13 SUN2 PRKACA NFAM1 IQSEC1 FMNL1 DMD ZDHHC18 WBP2 BCL6 CTDSP1 PPP1R12B ZER1 ARAP1 LRP10 TECPR2 SVIL GADD45…	0.0186763	#440154	0.5	0	12	1.36436
4354	10.8938	-1.21412	Cluster 10	Negative Regulation Of Oxidative Stress-Induced Neuron Death (GO:1903204)	PRKN IL10 PINK1 NONO PARK7 FBXO7 RACK1 HIF1A HIF1A RACK1 IL10 FBXO7 NONO PARK7 IL27 PINK1 POLDIP2 IL1RN NIPAL4 ACOD1 SLAMF7 GRAMD1A ICAM1 TNIP1 CCT7 CD274 PTPN1 RP11.119J18.1 TRIP10 FFAR3 TNF RNF19B ADIPOR1 TRAF1 DCAF12 CFAP99 MMP19 CLCF1 PLAUR NME2 EHD1 XRCC6 PFKFB3 USP12 OASL DHX58 TNIP3 MRPL37 CD40 SNRPB SOCS3 CAPN3 AC027682.1 MSC ABTB2 SPHK1 FCAMR PPP1R2 IL15RA PTX3 LAP3 SMS GAPDH PRMT5 YBX1 …	0.00646719	#aec7e8	0.5	0	12	1.59464		195	9.7155	-1.35452	Cluster 0	Positive Regulation Of Alpha-Beta T Cell Differentiation (GO:0046638)	NCKAP1L RUNX1 IHH LILRB4 RUNX3 TGFBR2 NKAP GLI3 PNP SOCS1 SHH TNFSF4 ZBTB7B NCKAP1L LCP2 MAN2B1 LILRB4 TNFRSF1B SLC15A3 LGALS9 RUNX3 PIK3R5 IL10RA TNIP1 TRAF1 LILRB2 SOCS1 MYO9B MYO1G CD4 EMILIN2 LAPTM5 BCL3 CD68 RELB PILRA EHD1 NFKB2 CTSZ ELF4 NINJ1 CCR5 LILRB1 IRF5 DOCK2 PPP1R18 OSCAR MGAT1 RNF19B ZC3H12A SQRDL HCK PLEKHO1 SIGLEC1 TAP1 ADCY7 AMPD3 PLEKHO2 NFKB1 FERMT3 ICAM1 TYMP SLAMF7 STX11 GR…	3.67441e-10	#440154	0.5	0	12	5.21741		195	9.7155	-1.35452	Cluster 0	Positive Regulation Of Alpha-Beta T Cell Differentiation (GO:0046638)	NCKAP1L RUNX1 IHH LILRB4 RUNX3 TGFBR2 NKAP GLI3 PNP SOCS1 SHH TNFSF4 ZBTB7B NCKAP1L LCP2 MAN2B1 LILRB4 TNFRSF1B SLC15A3 LGALS9 RUNX3 PIK3R5 IL10RA TNIP1 TRAF1 LILRB2 SOCS1 MYO9B MYO1G CD4 EMILIN2 LAPTM5 BCL3 CD68 RELB PILRA EHD1 NFKB2 CTSZ ELF4 NINJ1 CCR5 LILRB1 IRF5 DOCK2 PPP1R18 OSCAR MGAT1 RNF19B ZC3H12A SQRDL HCK PLEKHO1 SIGLEC1 TAP1 ADCY7 AMPD3 PLEKHO2 NFKB1 FERMT3 ICAM1 TYMP SLAMF7 STX11 GR…	0.101995	#440154	0.5	0	5	0.995711
4355	10.4089	-0.34804	Cluster 10	Regulation Of Reactive Oxygen Species Metabolic Process (GO:2000377)	PDGFRB SPHK2 SIRT5 MT3 ACOD1 SORD SIRT2 AGT COQ7 TGFBR2 RNF41 MAPK14 PAX2 BST1 PINK1 PIKFYVE AGTR1 SLC25A33 TP53 TFAP2A ARF4 PRKN NOXO1 UCP1 BRCA1 PARL ALOX5 CCN6 ROMO1 CYP1B1 RIPK1 SNCA CBR1 GADD45A DCXR AKR1C1 AKR1C3 F2 DHRS4 ACE2 EIF6 STK17A NOXA1 PLIN5 GRB2 PID1 CDKN1A PDGFB THBS1 FOXM1 ZC3H12A MPV17 RAC1 RAC2 BCO2 PDK3 TMBIM1 MGAT1 RAB5C TOM1 TNIP1 GRINA BCL3 GRN NUCB1 NINJ1 OGFR TNFRSF1A TI…	6.1569e-09	#aec7e8	0.5	0	12	4.60532		196	8.58808	-1.84546	Cluster 0	Positive Regulation Of Alpha-Beta T Cell Proliferation (GO:0046641)	SYK XCL1 CD81 EBI3 PTPN22 HLA-A IL18 RASAL3 TYK2 TGFBR2 HLA-E IL23A TNFSF4 IL12B LGALS9 CD55 JAK2 LGALS9 LAPTM5 HCLS1 PTPN6 CYTH1 LCP1 HLA.A STAT6 TYK2 MYO1G THEMIS2 TCIRG1 ARHGAP30 CD53 ARAP1 WIPF1 HLA.E FMNL1 LYN MYO9B RIN3 RASAL3 DOCK2 NCKAP1L HCK TAP1 TNFRSF14 GPSM3 LSP1 ARHGAP45 ARHGAP4 SH3BP1 WAS PLCB2 CSK SYK HLA.B STXBP2 RHOG PRKCD TGFB1 PARVG TNFRSF1B PPP1R18 NLRC5 GRK2 CORO1A GMIP RPS6K…	0.000100324	#440154	0.5	0	12	2.4993		196	8.58808	-1.84546	Cluster 0	Positive Regulation Of Alpha-Beta T Cell Proliferation (GO:0046641)	SYK XCL1 CD81 EBI3 PTPN22 HLA-A IL18 RASAL3 TYK2 TGFBR2 HLA-E IL23A TNFSF4 IL12B LGALS9 CD55 JAK2 LGALS9 LAPTM5 HCLS1 PTPN6 CYTH1 LCP1 HLA.A STAT6 TYK2 MYO1G THEMIS2 TCIRG1 ARHGAP30 CD53 ARAP1 WIPF1 HLA.E FMNL1 LYN MYO9B RIN3 RASAL3 DOCK2 NCKAP1L HCK TAP1 TNFRSF14 GPSM3 LSP1 ARHGAP45 ARHGAP4 SH3BP1 WAS PLCB2 CSK SYK HLA.B STXBP2 RHOG PRKCD TGFB1 PARVG TNFRSF1B PPP1R18 NLRC5 GRK2 CORO1A GMIP RPS6K…	0.108463	#440154	0.5	0	5	0.98236
4356	10.5468	-0.738982	Cluster 10	Regulation Of Response To Cytokine Stimulus (GO:0060759)	TLE5 MAP2K5 DHX9 WNT5A KLF4 PARP9 IFIH1 MAVS IRAK2 LRRC70 IRAK1 TAF9 MAPK7 CD24 SH2B3 RIGI SH2B3 TRIM25 ELF4 MAPKAPK2 IRAK2 HELZ2 IFIH1 FOSL2 IRAK1 ZDHHC5 RAB35 TNIP1 SBNO2 ZC3H12A RNF19B NFKB2 TICAM1 MYO9B PLAUR STX11 MAPK7 FLII MGAT1 AP5B1 TNFAIP2 BCL3 KLF4 WDR1 OGFR NFKB1 MAN2B1 EHD1 SZRD1 RAPGEF1 PTPN1 SRC B4GALT5 ABCC1 LILRB2 PIM3 MCL1 TRAPPC10 EHBP1L1 ISY1.RAB43 RELB TMEM127 VASP GRN MAFG T…	0.000640579	#aec7e8	0.5	0	12	2.09671		197	8.22762	-1.18397	Cluster 0	Regulation Of Mast Cell Activation Involved In Immune Response (GO:0033006)	C12ORF4 LYN UNC13D FES FER CD300A STXBP2 SPHK2 ENPP3 UNC13D STXBP2 WAS MYO1F FMNL1 C10ORF54 GPSM3 LYN SPI1 HCK THEMIS2 ADAM8 NFAM1 ARRB2 LRRC25 LILRB3 CFP PLCB2 APOBR ARAP1 NCF1B FGR ADGRE5 CSF2RB NCF2 NCF1 ABTB1 ARHGAP45 ARHGAP30 ITGAX PTPN6 RIN3 HCLS1 FES NCF4 GMIP FPR1 TCIRG1 CYTH4 CORO1A IL17RA HLA.E ARHGAP27 VASP DOK3 ALOX5 NADK EFHD2 NBEAL2 RASGRP4 LAPTM5 OSCAR ICAM3 LSP1 SMAP2 GRK2 LILRA2 …	4.33526e-05	#440154	0.5	0	12	2.68149		197	8.22762	-1.18397	Cluster 0	Regulation Of Mast Cell Activation Involved In Immune Response (GO:0033006)	C12ORF4 LYN UNC13D FES FER CD300A STXBP2 SPHK2 ENPP3 UNC13D STXBP2 WAS MYO1F FMNL1 C10ORF54 GPSM3 LYN SPI1 HCK THEMIS2 ADAM8 NFAM1 ARRB2 LRRC25 LILRB3 CFP PLCB2 APOBR ARAP1 NCF1B FGR ADGRE5 CSF2RB NCF2 NCF1 ABTB1 ARHGAP45 ARHGAP30 ITGAX PTPN6 RIN3 HCLS1 FES NCF4 GMIP FPR1 TCIRG1 CYTH4 CORO1A IL17RA HLA.E ARHGAP27 VASP DOK3 ALOX5 NADK EFHD2 NBEAL2 RASGRP4 LAPTM5 OSCAR ICAM3 LSP1 SMAP2 GRK2 LILRA2 …	0.0606988	#440154	0.5	0	5	1.10841
4357	10.1792	-0.727848	Cluster 10	Negative Regulation Of Cysteine-Type Endopeptidase Activity Involved In Apoptotic Process (GO:0043154)	GPX1 PIH1D1 DHCR24 MMP9 VEGFA PAX2 DPEP1 GAS6 NAIP RAF1 RNF34 DDX3X NOL3 PARK7 TNF IFI6 CAAP1 AQP1 PAK2 BCL2L12 DNAJB6 LAMP3 MAGEA3 SNCA FNIP1 RFFL USP47 MAP2K5 IGBP1 CDKN2D CSNK2A1 SIAH2 HGF PLAUR KLF4 XIAP AVP CARD16 LAMTOR5 CD44 FABP1 SRC ARL6IP1 THBS1 TRIAP1 SH3RF1 RPS6KA1 RPS6KA3 SFN TNIP1 PLAUR SQRDL CTSZ CD68 GRN RNF19B ICAM1 SRC NINJ1 BCL3 EHD1 SLC15A3 TMBIM1 ZC3H12A MGAT1 LILRB2 PILRA IF…	5.40956e-14	#aec7e8	0.5	0	12	7.13342		198	9.78644	-2.15145	Cluster 0	Cytosolic Pattern Recognition Receptor Signaling Pathway (GO:0002753)	PHB2 PHB1 CLPB TIFA TNFAIP3 CGAS STING1 ITCH IPO5 IFIH1 RNF135 CYLD MAVS TBK1 OAS3 DHX58 TRAF6 IRF3 TRIM25 IRF7 MAP3K7 MAP2K6 RIGI TRIM25 OAS2 HELZ2 DHX58 OAS3 MX1 IFIH1 MX2 IRF7 NFKB2 TAP1 OAS1 IFIT3 TNIP1 CMPK2 TRAF1 IFIT2 RNF19B PARP10 ELF4 SBNO2 STAT1 ADAR SAMD9 PARP14 EHD1 RELB OGFR RSAD2 PARP12 OASL MYO1G CMTR1 ZNFX1 CYTH1 IL10RA PML EPSTI1 NLRC5 LILRB2 ZC3H12A NFKB1 LYN DTX3L SLAMF7 BCL3 U…	0.000321955	#440154	0.5	0	12	2.2461		198	9.78644	-2.15145	Cluster 0	Cytosolic Pattern Recognition Receptor Signaling Pathway (GO:0002753)	PHB2 PHB1 CLPB TIFA TNFAIP3 CGAS STING1 ITCH IPO5 IFIH1 RNF135 CYLD MAVS TBK1 OAS3 DHX58 TRAF6 IRF3 TRIM25 IRF7 MAP3K7 MAP2K6 RIGI TRIM25 OAS2 HELZ2 DHX58 OAS3 MX1 IFIH1 MX2 IRF7 NFKB2 TAP1 OAS1 IFIT3 TNIP1 CMPK2 TRAF1 IFIT2 RNF19B PARP10 ELF4 SBNO2 STAT1 ADAR SAMD9 PARP14 EHD1 RELB OGFR RSAD2 PARP12 OASL MYO1G CMTR1 ZNFX1 CYTH1 IL10RA PML EPSTI1 NLRC5 LILRB2 ZC3H12A NFKB1 LYN DTX3L SLAMF7 BCL3 U…	4.47435e-06	#440154	0.5	0	12	3.17463
4358	10.6092	-1.20291	Cluster 10	Regulation Of Tyrosine Phosphorylation Of STAT Protein (GO:0042509)	LYN PTPN2 IL15 OCRL LIF OSM PPP2R1A CSHL1 IL18 TNFRSF1A IL3 VEGFA GH1 IL2 CRLF1 IL4 GH2 CNOT7 IL6 IL23A IFNG IL31RA CLCF1 NF2 IL6ST EPO CD40 CNTF CSF2 TNF SOCS3 IFNL1 GHR SOCS1 ERBB4 TNFRSF18 HES1 SH2B3 HES5 TNFSF18 TSLP IGF1 PTK6 PPP2CA PARP14 PARP9 IL22RA2 KIT HCLS1 FGFR3 CSF1R IL20 IL21 IFNA2 FLT3 CTF1 IL23R CSH2 CSH1 CCL5 IL12B PIBF1 IL12A IL6R JAK2 CD274 RNF19B ICAM1 TRAF1 TNIP1 ZC3H12A SLAM…	0.000587933	#aec7e8	0.5	0	12	2.11534		199	10.0533	-1.21933	Cluster 0	Regulation Of Mast Cell Activation (GO:0033003)	LYN MILR1 CD84 PLSCR1 TSLP CD300LF HAVCR1 CRLF2 NECTIN2 LILRB2 LILRB4 RNF19B PILRA NINJ1 SLC15A3 IL1RN SLAMF7 PLAUR CD68 EMILIN2 LYN HCK TNFRSF1B ICAM1 TNFAIP2 SIGLEC1 ADGRE2 OSCAR CCR5 GPR84 PLSCR1 FCER1G PIK3R5 CD84 SQRDL IL27 DHX58 NCF2 AMPD3 TLR2 BCL3 IL10 TNIP1 CCRL2 CRLF2 SIGLEC9 EHD1 MMP19 LILRB1 IL10RA CTSZ NPL CD274 LACTB TBXAS1 MAN2B1 SLC43A2 ZC3H12A CTSS STX11 TRAF1 CCR1 PIK3AP1 TLR8 C…	1.01124e-13	#440154	0.5	0	12	6.99757		199	10.0533	-1.21933	Cluster 0	Regulation Of Mast Cell Activation (GO:0033003)	LYN MILR1 CD84 PLSCR1 TSLP CD300LF HAVCR1 CRLF2 NECTIN2 LILRB2 LILRB4 RNF19B PILRA NINJ1 SLC15A3 IL1RN SLAMF7 PLAUR CD68 EMILIN2 LYN HCK TNFRSF1B ICAM1 TNFAIP2 SIGLEC1 ADGRE2 OSCAR CCR5 GPR84 PLSCR1 FCER1G PIK3R5 CD84 SQRDL IL27 DHX58 NCF2 AMPD3 TLR2 BCL3 IL10 TNIP1 CCRL2 CRLF2 SIGLEC9 EHD1 MMP19 LILRB1 IL10RA CTSZ NPL CD274 LACTB TBXAS1 MAN2B1 SLC43A2 ZC3H12A CTSS STX11 TRAF1 CCR1 PIK3AP1 TLR8 C…	0.180605	#440154	0.5	0	5	0.871635
4359	10.6491	-0.996909	Cluster 10	Negative Regulation Of Extrinsic Apoptotic Signaling Pathway In Absence Of Ligand (GO:2001240)	MAP2K5 EYA1 EYA2 UNC5B CSF2 EYA3 EYA4 TNF IFI6 GATA1 IL1A IL1B TERT GDNF BCL2L1 SNAI2 HSPA1A BCL2 PF4 MAPK7 MCL1 HSPA1B IL1B TNF IL1A ZC3H12A CXCL3 EHD1 TNIP1 PTGS2 IRAK2 IER3 SERPINB2 PLAUR PFKFB3 TICAM1 NFKB2 HELZ2 ADORA2A TRAF1 RNF19B NFKB1 STX11 SRC MAPKAPK2 CXCL8 GPR84 MOB3C SBNO2 CD274 AMPD3 SOCS3 PIM3 ICAM1 SPHK1 BCL3 CEBPB ELL IER5 FOSL2 MAP2K3 IL6 NLRP3 GRAMD1A TRIM25 MSC CCRL2 AC013444.…	3.07365e-06	#aec7e8	0.5	0	12	3.25617		200	8.89049	-1.31259	Cluster 0	Regulation Of Macrophage Cytokine Production (GO:0010935)	TGFB1 TGFB3 TGFB2 WNT5A LILRB1 LAPTM5 SIRT1 HLA-G GPRC5B IRAK3 PLCG2 SEMA7A CUEDC2 MYO9B LAPTM5 TGFB1 HCK ARAP1 GNAI2 THEMIS2 PLEKHO2 SIRPA PPP1R18 LYN LILRB1 TNFRSF1B VASP TLN1 FMNL1 SPI1 LILRB2 PIK3R5 MYO1G FGR EHBP1L1 TLR2 NOD2 NCF2 TFEB TCIRG1 WAS IRAK3 GMIP MAN2B1 DOCK2 KLF13 ELF4 ARRB2 PTPN6 OSCAR RAPGEF1 ITGAX NCF1 SIGLEC9 PTK2B CYTH1 TNIP1 PLCB2 DOK3 PILRA ARHGEF2 SLC15A3 ARHGAP30 RIN3 LI…	1.05519e-08	#440154	0.5	0	12	4.48833		200	8.89049	-1.31259	Cluster 0	Regulation Of Macrophage Cytokine Production (GO:0010935)	TGFB1 TGFB3 TGFB2 WNT5A LILRB1 LAPTM5 SIRT1 HLA-G GPRC5B IRAK3 PLCG2 SEMA7A CUEDC2 MYO9B LAPTM5 TGFB1 HCK ARAP1 GNAI2 THEMIS2 PLEKHO2 SIRPA PPP1R18 LYN LILRB1 TNFRSF1B VASP TLN1 FMNL1 SPI1 LILRB2 PIK3R5 MYO1G FGR EHBP1L1 TLR2 NOD2 NCF2 TFEB TCIRG1 WAS IRAK3 GMIP MAN2B1 DOCK2 KLF13 ELF4 ARRB2 PTPN6 OSCAR RAPGEF1 ITGAX NCF1 SIGLEC9 PTK2B CYTH1 TNIP1 PLCB2 DOK3 PILRA ARHGEF2 SLC15A3 ARHGAP30 RIN3 LI…	0.0154774	#440154	0.5	0	12	1.40515
4360	10.5759	-0.375029	Cluster 10	Positive Regulation Of Proteolysis (GO:0045862)	FBXW11 IST1 BAD RHBDD1 TNIP1 TNFRSF1B IL1B MAPK12 PINK1 IFNG ADAM9 OGT CYFIP2 SNX33 NLRC4 TNF CTSV NKD2 TANK CTSS CASP8 CTSL CTSK PERP ATP5IF1 CAPN3 PACSIN3 FADD CTSH SNX9 BTRC CTSC GPLD1 CCBE1 PLK1 NRDC ADRA2A ANGPTL8 RCAN3 ASTL ASPH STUB1 TRIM32 TNP2 FGFR4 TNP1 AURKAIP1 FURIN NDUFA13 HDAC2 GBA1 CLN6 PRSS22 ZC3H12A BAG2 APOE BAK1 SH3D19 TBC1D10A MGAT1 TNIP1 LAMP1 GRN MAPKAPK2 OGFR CTSZ TMBIM1 TR…	0.000250055	#aec7e8	0.5	0	12	2.30098		201	8.14012	-0.867079	Cluster 0	Defense Response To Fungus (GO:0050832)	DEFB119 CARD9 FAM3A RARRES2 RNASE7 DEFA4 NRG1 DEFB114 DEFB135 DEFB106A CLEC4C CLEC4D CLEC4E NLRP10 CLEC6A CLEC4A LTF S100A9 GAPDH S100A8 DEFB4A CX3CR1 CLEC7A RNASE8 IGF2BP1 IL36RN PLCG2 S100A12 GPR15LG S100A8 S100A9 S100A12 PLBD1 HK3 NLRC4 CLEC4D HCK TLR8 LILRB3 ADGRG3 NCF2 FGR SIGLEC5 P2RY13 FPR1 FPR2 IL17RA SIRPB1 GCA ALOX5 CLEC4E ITGAM LILRA6 MNDA THEMIS2 NFAM1 CFP GLT1D1 TLR2 OSCAR VNN2 ARRB2…	0.00046289	#440154	0.5	0	12	2.16726		201	8.14012	-0.867079	Cluster 0	Defense Response To Fungus (GO:0050832)	DEFB119 CARD9 FAM3A RARRES2 RNASE7 DEFA4 NRG1 DEFB114 DEFB135 DEFB106A CLEC4C CLEC4D CLEC4E NLRP10 CLEC6A CLEC4A LTF S100A9 GAPDH S100A8 DEFB4A CX3CR1 CLEC7A RNASE8 IGF2BP1 IL36RN PLCG2 S100A12 GPR15LG S100A8 S100A9 S100A12 PLBD1 HK3 NLRC4 CLEC4D HCK TLR8 LILRB3 ADGRG3 NCF2 FGR SIGLEC5 P2RY13 FPR1 FPR2 IL17RA SIRPB1 GCA ALOX5 CLEC4E ITGAM LILRA6 MNDA THEMIS2 NFAM1 CFP GLT1D1 TLR2 OSCAR VNN2 ARRB2…	0.378022	#440154	0.5	0	5	0.711241
4361	10.1917	1.82472	Cluster 10	Adenylate Cyclase-Activating Adrenergic Receptor Signaling Pathway (GO:0071880)	ADRB1 ADRB2 ADRA1D ADRB3 ADRA2C ADRA1B ADRA2B ADRA2A AKAP13 RAPGEF2 DRD1 DRD2 DRD3 GPR101 DRD5 ADRA1D RAPGEF2 ADRB1 ADRB3 DRD1 AKAP13 ADRB2 DRD3 ADRA2A ADRA2B ADRA1B DRD5 AC073135.3 DRD2 KLF15 CFLAR PFKFB3 KIAA1456 C1QL2 GPR31 LIPI CDH23 ADRA2C TNS1 SOD2 LOXHD1 SOCS3 SPSB1 HIVEP2 KRT40 KMO SHF AMPD3 UGT3A2 FNIP2 ABR ARHGAP26 ABTB2 MAPKBP1 IL1RN ARHGAP31 RP1.59B16.1 SLAMF7 SORBS1 VPS13D ICAM1 FOSL…	0.322847	#aec7e8	0.5	0	5	0.745501		202	8.7103	-1.07974	Cluster 0	Defense Response To Protozoan (GO:0042832)	BATF2 GBP7 GBP6 CD40 SLC11A1 NKG7 DEFA1 LYST MYD88 CLEC7A IRF4 GBP1 PF4 GBP2 GBP4 GBP2 LILRB2 HCK NCF2 LYN TAP1 TLR8 THEMIS2 STX11 LILRB3 NOD2 IRF1 MX2 TNFRSF1B TLR2 LITAF HCLS1 PILRA CTSS HLA.E ITGAX ADGRE2 GBP4 AOAH IL10RA WIPF1 RNF19B LCP1 LILRA6 PARP14 CLEC7A CSF2RB CD53 GBP1 PIK3R5 NCF1B FGR LCP2 MYD88 APOBEC3A LAPTM5 AQP9 PTAFR OSCAR ARRB2 NCF1 SIGLEC9 TNFAIP2 RASSF5 CYTH4 GPSM3 FMNL1 HLA.A…	2.11804e-11	#440154	0.5	0	12	5.83703		202	8.7103	-1.07974	Cluster 0	Defense Response To Protozoan (GO:0042832)	BATF2 GBP7 GBP6 CD40 SLC11A1 NKG7 DEFA1 LYST MYD88 CLEC7A IRF4 GBP1 PF4 GBP2 GBP4 GBP2 LILRB2 HCK NCF2 LYN TAP1 TLR8 THEMIS2 STX11 LILRB3 NOD2 IRF1 MX2 TNFRSF1B TLR2 LITAF HCLS1 PILRA CTSS HLA.E ITGAX ADGRE2 GBP4 AOAH IL10RA WIPF1 RNF19B LCP1 LILRA6 PARP14 CLEC7A CSF2RB CD53 GBP1 PIK3R5 NCF1B FGR LCP2 MYD88 APOBEC3A LAPTM5 AQP9 PTAFR OSCAR ARRB2 NCF1 SIGLEC9 TNFAIP2 RASSF5 CYTH4 GPSM3 FMNL1 HLA.A…	4.47435e-06	#440154	0.5	0	12	3.17463
													203	9.78702	-2.22284	Cluster 0	Defense Response To Symbiont (GO:0140546)	RAB2B GBP7 GARIN5A MX1 RSAD2 MX2 ACOD1 SLFN13 IFI44L ZNFX1 CNOT7 SLFN11 IFI27 CD207 TBKBP1 RNF185 RELA IFITM2 IFITM3 IFITM1 IFI6 TANK IFNL1 PYCARD NLRP9 IFNL3 EXOSC5 IFNL2 IFI16 NLRP6 NLRP1 EXOSC4 GBP2 MICA IFNL4 GBP5 AZI2 APOBEC3D AICDA APOBEC3F APOBEC3G APOBEC3H DDX56 BNIP3L TRAF3 ISG15 MOV10 ISG20 MYD88 MAVS PLSCR1 NT5C3A PDE12 BCL2L1 NDUFAF4 MAP3K14 APOBEC3A ZCCHC3 APOBEC3B RIGI APOBEC3C IFNA…	3.44788e-06	#440154	0.5	0	12	3.23122		203	9.78702	-2.22284	Cluster 0	Defense Response To Symbiont (GO:0140546)	RAB2B GBP7 GARIN5A MX1 RSAD2 MX2 ACOD1 SLFN13 IFI44L ZNFX1 CNOT7 SLFN11 IFI27 CD207 TBKBP1 RNF185 RELA IFITM2 IFITM3 IFITM1 IFI6 TANK IFNL1 PYCARD NLRP9 IFNL3 EXOSC5 IFNL2 IFI16 NLRP6 NLRP1 EXOSC4 GBP2 MICA IFNL4 GBP5 AZI2 APOBEC3D AICDA APOBEC3F APOBEC3G APOBEC3H DDX56 BNIP3L TRAF3 ISG15 MOV10 ISG20 MYD88 MAVS PLSCR1 NT5C3A PDE12 BCL2L1 NDUFAF4 MAP3K14 APOBEC3A ZCCHC3 APOBEC3B RIGI APOBEC3C IFNA…	4.04607e-05	#440154	0.5	0	12	2.69648
													204	8.55589	-1.10131	Cluster 0	Defense Response To Tumor Cell (GO:0002357)	PLK5 RELA SPI1 DAPK1 PRDX2 LAPTM5 PRF1 TNFRSF10B DLEC1 KLF4 CASC2 RBMS3 SPI1 LAPTM5 ARRB2 NFAM1 ARAP1 THEMIS2 FMNL1 HCK FGR MYO1F WAS APOBR EFHD2 C5AR1 LRRC25 OSCAR C10ORF54 LILRB3 ADAM8 TNFRSF1B ITGAX PLEKHO2 TCIRG1 PIK3R5 PILRA PLCB2 RIN3 CFP GPSM3 SIGLEC9 GMIP LILRB2 VASP HK3 ADGRE5 NCF2 AOAH PRKCD CYTH4 PTAFR ARHGAP30 GLIPR2 CD300LB AP5B1 NCF1 NADK NOD2 NCF1B LSP1 HLA.B MAN2B1 CORO1A PTPN6 RH…	3.83023e-07	#440154	0.5	0	12	3.70839		204	8.55589	-1.10131	Cluster 0	Defense Response To Tumor Cell (GO:0002357)	PLK5 RELA SPI1 DAPK1 PRDX2 LAPTM5 PRF1 TNFRSF10B DLEC1 KLF4 CASC2 RBMS3 SPI1 LAPTM5 ARRB2 NFAM1 ARAP1 THEMIS2 FMNL1 HCK FGR MYO1F WAS APOBR EFHD2 C5AR1 LRRC25 OSCAR C10ORF54 LILRB3 ADAM8 TNFRSF1B ITGAX PLEKHO2 TCIRG1 PIK3R5 PILRA PLCB2 RIN3 CFP GPSM3 SIGLEC9 GMIP LILRB2 VASP HK3 ADGRE5 NCF2 AOAH PRKCD CYTH4 PTAFR ARHGAP30 GLIPR2 CD300LB AP5B1 NCF1 NADK NOD2 NCF1B LSP1 HLA.B MAN2B1 CORO1A PTPN6 RH…	0.0185986	#440154	0.5	0	12	1.36526
													205	9.78302	-2.21546	Cluster 0	Defense Response To Virus (GO:0051607)	RAB2B GBP7 GARIN5A MX1 RSAD2 MX2 ATAD3A ACOD1 MID2 PML UBE2W CXCL10 SLFN13 IFI44L ZNFX1 CNOT7 SLFN11 IFI27 CD207 TBKBP1 TRIM15 RNF185 TRIM11 UBE2N TRIM13 AKAP1 RELA IFITM2 IFITM3 CLPB IFITM1 TNF IFI6 TANK IFNL1 PYCARD NLRP9 IFNL3 EXOSC5 IFNL2 IFI16 NLRP6 NLRP1 EXOSC4 GBP2 MORC3 MICA IFNL4 GBP5 AZI2 APOBEC3D AICDA APOBEC3F APOBEC3G APOBEC3H USP44 DDX56 BNIP3L NMBR TRAF3 ISG15 MOV10 ISG20 MYD88 MAV…	1.95446e-06	#440154	0.5	0	12	3.35449		205	9.78302	-2.21546	Cluster 0	Defense Response To Virus (GO:0051607)	RAB2B GBP7 GARIN5A MX1 RSAD2 MX2 ATAD3A ACOD1 MID2 PML UBE2W CXCL10 SLFN13 IFI44L ZNFX1 CNOT7 SLFN11 IFI27 CD207 TBKBP1 TRIM15 RNF185 TRIM11 UBE2N TRIM13 AKAP1 RELA IFITM2 IFITM3 CLPB IFITM1 TNF IFI6 TANK IFNL1 PYCARD NLRP9 IFNL3 EXOSC5 IFNL2 IFI16 NLRP6 NLRP1 EXOSC4 GBP2 MORC3 MICA IFNL4 GBP5 AZI2 APOBEC3D AICDA APOBEC3F APOBEC3G APOBEC3H USP44 DDX56 BNIP3L NMBR TRAF3 ISG15 MOV10 ISG20 MYD88 MAV…	4.81146e-06	#440154	0.5	0	12	3.15886
													206	8.91748	-0.54374	Cluster 0	Positive Regulation Of Amyloid Precursor Protein Catabolic Process (GO:1902993)	LYN RELA GSK3A IFNGR1 ROCK2 CHRNA7 SLC2A13 PSG1 CLU TNF AGER RANBP9 PICALM EFNA1 EFNA3 LRRTM3 IFNG CASP3 ABCG1 GSAP EPHA4 PICALM LYN IFNGR1 NCF2 SIRPA TLR8 HCK TLR2 OGFRL1 RNF19B CTSS TLR4 CHST15 N4BP1 SLC43A2 ITGAX GSAP TMEM127 PILRA AQP9 KDM7A SUSD6 ABCG1 LILRB2 ITM2B ACSL1 DENND5A STX11 ARAP1 PIK3R5 CSF2RB STK40 NAMPT CYBB LILRB3 RASSF2 TNFAIP2 LITAF CCR1 MXD1 TNFRSF1B RNF149 IGF2R PSAP ATP6V1…	5.9434e-15	#440154	0.5	0	12	7.61298		206	8.91748	-0.54374	Cluster 0	Positive Regulation Of Amyloid Precursor Protein Catabolic Process (GO:1902993)	LYN RELA GSK3A IFNGR1 ROCK2 CHRNA7 SLC2A13 PSG1 CLU TNF AGER RANBP9 PICALM EFNA1 EFNA3 LRRTM3 IFNG CASP3 ABCG1 GSAP EPHA4 PICALM LYN IFNGR1 NCF2 SIRPA TLR8 HCK TLR2 OGFRL1 RNF19B CTSS TLR4 CHST15 N4BP1 SLC43A2 ITGAX GSAP TMEM127 PILRA AQP9 KDM7A SUSD6 ABCG1 LILRB2 ITM2B ACSL1 DENND5A STX11 ARAP1 PIK3R5 CSF2RB STK40 NAMPT CYBB LILRB3 RASSF2 TNFAIP2 LITAF CCR1 MXD1 TNFRSF1B RNF149 IGF2R PSAP ATP6V1…	0.3909	#440154	0.5	0	5	0.703967
													207	8.89391	-1.35312	Cluster 0	Regulation Of Macrophage Apoptotic Process (GO:2000109)	MEF2C SELENOS NOD2 IRF7 SIRT1 NOD2 IRF7 MX2 LYN LILRB2 HCK THEMIS2 LILRB3 NCF2 TNFRSF1B TLR2 FMNL1 MEF2C NCF1 STX11 OAS2 NCF1B SIRT1 SMAP2 PIK3R5 FGR MYO1G WAS PILRA RNF19B OSCAR TLR8 ITGAX OAS1 GMIP NCF1C HLA.B ADAM8 LAPTM5 SPI1 CSF2RB TAP1 TRIM25 ARRB2 ELL MPEG1 PTK2B IL10RA PRKCD CYTH1 LILRA6 CFP ALOX5 CYTH4 LITAF AP5B1 NFAM1 C10ORF54 APOBR LGALS9 DOK3 LCP1 GPSM3 ARHGAP30 LILRB1 HCLS1 LRRC25 A…	3.38354e-07	#440154	0.5	0	12	3.73531		207	8.89391	-1.35312	Cluster 0	Regulation Of Macrophage Apoptotic Process (GO:2000109)	MEF2C SELENOS NOD2 IRF7 SIRT1 NOD2 IRF7 MX2 LYN LILRB2 HCK THEMIS2 LILRB3 NCF2 TNFRSF1B TLR2 FMNL1 MEF2C NCF1 STX11 OAS2 NCF1B SIRT1 SMAP2 PIK3R5 FGR MYO1G WAS PILRA RNF19B OSCAR TLR8 ITGAX OAS1 GMIP NCF1C HLA.B ADAM8 LAPTM5 SPI1 CSF2RB TAP1 TRIM25 ARRB2 ELL MPEG1 PTK2B IL10RA PRKCD CYTH1 LILRA6 CFP ALOX5 CYTH4 LITAF AP5B1 NFAM1 C10ORF54 APOBR LGALS9 DOK3 LCP1 GPSM3 ARHGAP30 LILRB1 HCLS1 LRRC25 A…	0.180605	#440154	0.5	0	5	0.871635
													208	8.48239	-1.24621	Cluster 0	Regulation Of Mast Cell Degranulation (GO:0043304)	LYN UNC13D CD84 CD300A SYK STXBP2 SPHK2 GAB2 C12ORF4 FGR IL4 FES FER LGALS9 HCK FGR THEMIS2 SPI1 FMNL1 WAS LYN MYO1F ARRB2 PLCB2 NCF2 ARAP1 LAPTM5 ITGAX LRRC25 APOBR GPSM3 C10ORF54 LILRB3 STXBP2 NFAM1 ARHGAP30 ADAM8 HCLS1 CYTH4 LGALS9 IL17RA PTPN6 CTSS OSCAR CFP TCIRG1 GMIP RIN3 ALOX5 CSF2RB UNC13D NCF1B SYK ADGRE5 HK3 HLA.E AOAH PARVG DOK3 LSP1 PILRA SIGLEC9 EFHD2 ARHGAP45 NCF1 NCF4 TNFRSF1B PTA…	8.72985e-07	#440154	0.5	0	12	3.5295		208	8.48239	-1.24621	Cluster 0	Regulation Of Mast Cell Degranulation (GO:0043304)	LYN UNC13D CD84 CD300A SYK STXBP2 SPHK2 GAB2 C12ORF4 FGR IL4 FES FER LGALS9 HCK FGR THEMIS2 SPI1 FMNL1 WAS LYN MYO1F ARRB2 PLCB2 NCF2 ARAP1 LAPTM5 ITGAX LRRC25 APOBR GPSM3 C10ORF54 LILRB3 STXBP2 NFAM1 ARHGAP30 ADAM8 HCLS1 CYTH4 LGALS9 IL17RA PTPN6 CTSS OSCAR CFP TCIRG1 GMIP RIN3 ALOX5 CSF2RB UNC13D NCF1B SYK ADGRE5 HK3 HLA.E AOAH PARVG DOK3 LSP1 PILRA SIGLEC9 EFHD2 ARHGAP45 NCF1 NCF4 TNFRSF1B PTA…	0.0524462	#440154	0.5	0	5	1.14014
													209	9.10953	-0.999424	Cluster 0	Negative Regulation Of Peptidyl-Tyrosine Phosphorylation (GO:0050732)	PTPN2 SRCIN1 DMTN PRKCD CD300A SEMA4D CAV1 OCRL PPP2R1A PTK6 LILRB4 PPP2CA PARP14 PTPRC SFRP2 PRKCZ SH3BP5L NF2 PTPN6 MVP THY1 SAMSN1 SFRP1 SOCS3 SOCS1 HYAL2 NTF3 SH3BP5 PIBF1 SH2B3 SIRPA HCK LILRB2 GNAI2 ARAP1 MYO9B SBNO2 TNFRSF1B VASP MGAT1 NCF2 TNIP1 LILRB3 PRKCD PPP1R18 EFHD2 PILRA THEMIS2 EHD1 BCL3 PIK3R5 OGFR OSCAR ITGAX TCIRG1 LITAF PLEKHO2 PLEKHM2 TLR2 TLR8 RNF19B TMEM127 FMNL1 ARRB2 LYN …	1.08819e-06	#440154	0.5	0	12	3.48165		209	9.10953	-0.999424	Cluster 0	Negative Regulation Of Peptidyl-Tyrosine Phosphorylation (GO:0050732)	PTPN2 SRCIN1 DMTN PRKCD CD300A SEMA4D CAV1 OCRL PPP2R1A PTK6 LILRB4 PPP2CA PARP14 PTPRC SFRP2 PRKCZ SH3BP5L NF2 PTPN6 MVP THY1 SAMSN1 SFRP1 SOCS3 SOCS1 HYAL2 NTF3 SH3BP5 PIBF1 SH2B3 SIRPA HCK LILRB2 GNAI2 ARAP1 MYO9B SBNO2 TNFRSF1B VASP MGAT1 NCF2 TNIP1 LILRB3 PRKCD PPP1R18 EFHD2 PILRA THEMIS2 EHD1 BCL3 PIK3R5 OGFR OSCAR ITGAX TCIRG1 LITAF PLEKHO2 PLEKHM2 TLR2 TLR8 RNF19B TMEM127 FMNL1 ARRB2 LYN …	0.0697839	#440154	0.5	0	5	1.07812
													210	8.21967	-0.844092	Cluster 0	Negative Regulation Of Phagocytosis (GO:0050765)	CD300A DYSF HMGB1 TLR2 FCGR2B PLSCR1 SNX3 PIP4P2 SYT11 SIRPA PRTN3 CD300LF RACK1 CD47 APPL1 HCK TLR2 NCF2 SPI1 LILRB3 TLR8 ITGAX THEMIS2 SIGLEC9 PILRA LYN MYO1F ARRB2 FGR OSCAR SIRPA NFAM1 LRRC25 APOBR C5AR1 CSF2RB CTSS PTAFR ALOX5 LILRB2 FPR1 LILRA6 C10ORF54 NCF1B FPR2 IL17RA SIGLEC5 CCR1 HK3 NLRC4 NCF4 P2RY13 EVI2B NOD2 GLT1D1 ARAP1 SIRPB2 SIRPB1 WAS DYSF RASSF2 CLEC7A CYTH4 AOAH HRH2 AQP9 ADAM…	8.15529e-10	#440154	0.5	0	12	5.04428		210	8.21967	-0.844092	Cluster 0	Negative Regulation Of Phagocytosis (GO:0050765)	CD300A DYSF HMGB1 TLR2 FCGR2B PLSCR1 SNX3 PIP4P2 SYT11 SIRPA PRTN3 CD300LF RACK1 CD47 APPL1 HCK TLR2 NCF2 SPI1 LILRB3 TLR8 ITGAX THEMIS2 SIGLEC9 PILRA LYN MYO1F ARRB2 FGR OSCAR SIRPA NFAM1 LRRC25 APOBR C5AR1 CSF2RB CTSS PTAFR ALOX5 LILRB2 FPR1 LILRA6 C10ORF54 NCF1B FPR2 IL17RA SIGLEC5 CCR1 HK3 NLRC4 NCF4 P2RY13 EVI2B NOD2 GLT1D1 ARAP1 SIRPB2 SIRPB1 WAS DYSF RASSF2 CLEC7A CYTH4 AOAH HRH2 AQP9 ADAM…	0.0154774	#440154	0.5	0	12	1.40515
													211	8.06005	-2.12769	Cluster 0	Negative Regulation Of Phosphatidylinositol 3-Kinase Signaling (GO:0014067)	PIK3IP1 PTEN STAMBP TWIST1 TSC2 NOP53 NLRC3 TREM2 SLC9A3R1 PIK3IP1 NLRC3 ARHGEF1 TMC8 ARHGAP45 SUN2 ZAP70 TMC6 ARHGAP4 AKNA NLRC5 EVL SLC9A3R1 RASAL3 CYTH1 TBC1D10C LRCH4 RASGRP2 FAM102A MLLT6 EML3 CDC42SE1 TSC2 CD247 IL16 RASA3 RNF166 FGD3 HLA.E CD6 IKZF1 PLCB2 ADCY7 ARHGAP30 CYTH4 FMNL1 DENND1C PBXIP1 PIK3CD IL10RA GRK2 LIMD2 CORO7 ETS1 TNFRSF14 PSD4 RASSF5 TCIRG1 CCDC88C CD3E TCF7 WIPF1 CORO1A…	0.0189995	#440154	0.5	0	12	1.36063		211	8.06005	-2.12769	Cluster 0	Negative Regulation Of Phosphatidylinositol 3-Kinase Signaling (GO:0014067)	PIK3IP1 PTEN STAMBP TWIST1 TSC2 NOP53 NLRC3 TREM2 SLC9A3R1 PIK3IP1 NLRC3 ARHGEF1 TMC8 ARHGAP45 SUN2 ZAP70 TMC6 ARHGAP4 AKNA NLRC5 EVL SLC9A3R1 RASAL3 CYTH1 TBC1D10C LRCH4 RASGRP2 FAM102A MLLT6 EML3 CDC42SE1 TSC2 CD247 IL16 RASA3 RNF166 FGD3 HLA.E CD6 IKZF1 PLCB2 ADCY7 ARHGAP30 CYTH4 FMNL1 DENND1C PBXIP1 PIK3CD IL10RA GRK2 LIMD2 CORO7 ETS1 TNFRSF14 PSD4 RASSF5 TCIRG1 CCDC88C CD3E TCF7 WIPF1 CORO1A…	0.542494	#440154	0.5	0	5	0.632803
													212	8.53469	-1.65235	Cluster 0	Positive Regulation Of T Cell Migration (GO:2000406)	CCR2 RHOA CCL21 CCL20 XCL1 WNT5A ADAM10 OXSR1 CXCL10 CXCL12 CXCL13 ADAM17 WNK1 S100A7 XCL2 APP DOCK8 AIF1 PYCARD SPN TMEM102 STK39 CCL5 ABL2 TNFRSF14 MYO9B HCLS1 LCP1 DOCK2 WIPF1 ARAP1 NCKAP1L STAT6 DOCK8 TLN1 PPP1R18 LAPTM5 ELF4 ARHGAP30 MGAT1 CD53 GNAI2 TNFRSF14 AOAH EHBP1L1 CTSS HCK VASP KLF13 TAP1 PTPN6 THEMIS2 IL17RA NCF2 MAN2B1 LGALS9 HLA.A MPEG1 PLCB2 GBP2 GRK2 TNFRSF1B MSN RPS6KA1 TMEM127…	4.1347e-08	#440154	0.5	0	12	4.19178		212	8.53469	-1.65235	Cluster 0	Positive Regulation Of T Cell Migration (GO:2000406)	CCR2 RHOA CCL21 CCL20 XCL1 WNT5A ADAM10 OXSR1 CXCL10 CXCL12 CXCL13 ADAM17 WNK1 S100A7 XCL2 APP DOCK8 AIF1 PYCARD SPN TMEM102 STK39 CCL5 ABL2 TNFRSF14 MYO9B HCLS1 LCP1 DOCK2 WIPF1 ARAP1 NCKAP1L STAT6 DOCK8 TLN1 PPP1R18 LAPTM5 ELF4 ARHGAP30 MGAT1 CD53 GNAI2 TNFRSF14 AOAH EHBP1L1 CTSS HCK VASP KLF13 TAP1 PTPN6 THEMIS2 IL17RA NCF2 MAN2B1 LGALS9 HLA.A MPEG1 PLCB2 GBP2 GRK2 TNFRSF1B MSN RPS6KA1 TMEM127…	0.00870252	#440154	0.5	0	12	1.53018
													213	10.0121	-1.29517	Cluster 0	Negative Regulation Of Production Of Molecular Mediator Of Immune Response (GO:0002701)	CR1 FCRL3 IL10 FCGR2B LILRB1 APOA2 TNF CD22 LILRB1 LILRB2 FCGR2B TRAF1 TNF TNFRSF1B TNIP1 CD40 HCK EHD1 PIK3AP1 RNF19B SLAMF7 LYN IL10 PILRA NFKB2 PIK3R5 ICAM1 IL10RA MX2 AMPD3 GPR132 LILRB4 SLC15A3 ADORA2A ADGRE2 NINJ1 LAPTM5 CCR5 GPR84 NCF2 IL1RN OSCAR TLR8 DHX58 CD274 NOD2 IL27 NFKBIE BCL3 ZC3H12A SIGLEC1 TNFAIP2 IRF5 TLR2 MSC STX11 SLAMF1 LILRB3 SIGLEC9 MMP19 SOD2 CYTH1 SLC2A6 THEMIS2 VAV1 IT…	1.17644e-11	#440154	0.5	0	12	5.96472		213	10.0121	-1.29517	Cluster 0	Negative Regulation Of Production Of Molecular Mediator Of Immune Response (GO:0002701)	CR1 FCRL3 IL10 FCGR2B LILRB1 APOA2 TNF CD22 LILRB1 LILRB2 FCGR2B TRAF1 TNF TNFRSF1B TNIP1 CD40 HCK EHD1 PIK3AP1 RNF19B SLAMF7 LYN IL10 PILRA NFKB2 PIK3R5 ICAM1 IL10RA MX2 AMPD3 GPR132 LILRB4 SLC15A3 ADORA2A ADGRE2 NINJ1 LAPTM5 CCR5 GPR84 NCF2 IL1RN OSCAR TLR8 DHX58 CD274 NOD2 IL27 NFKBIE BCL3 ZC3H12A SIGLEC1 TNFAIP2 IRF5 TLR2 MSC STX11 SLAMF1 LILRB3 SIGLEC9 MMP19 SOD2 CYTH1 SLC2A6 THEMIS2 VAV1 IT…	0.403802	#440154	0.5	0	5	0.696916
													214	8.96367	-1.86578	Cluster 0	Positive Regulation Of T Cell Proliferation (GO:0042102)	CCR2 ANXA1 IL15 CD70 LILRB2 PDCD1LG2 IL18 VCAM1 TYK2 IL2 IL1B IL4 PTPRC TMIGD2 IL6 IL23A CD6 CD209 TNFSF4 LEP CD28 TNFSF9 IL6ST CD24 CD86 EBI3 CD80 HMGB1 SLC7A1 CD3E PPP3CA PNP PYCARD FADD RPS3 IL12RB1 IGFBP2 SYK NCKAP1L IGF1 IGF2 CCDC88B CD40LG ZP4 CD46 ZP3 CLECL1P CD276 CD274 IL21 TNFRSF13C HHLA2 IL23R TFRC AIF1 CD1D HLA-DMB CCL5 HLA-DPA1 IL12B CCL19 NCK1 NCK2 JAK2 ICOSLG IL10RA TNFRSF1B LILRB2…	4.1347e-08	#440154	0.5	0	12	4.19178		214	8.96367	-1.86578	Cluster 0	Positive Regulation Of T Cell Proliferation (GO:0042102)	CCR2 ANXA1 IL15 CD70 LILRB2 PDCD1LG2 IL18 VCAM1 TYK2 IL2 IL1B IL4 PTPRC TMIGD2 IL6 IL23A CD6 CD209 TNFSF4 LEP CD28 TNFSF9 IL6ST CD24 CD86 EBI3 CD80 HMGB1 SLC7A1 CD3E PPP3CA PNP PYCARD FADD RPS3 IL12RB1 IGFBP2 SYK NCKAP1L IGF1 IGF2 CCDC88B CD40LG ZP4 CD46 ZP3 CLECL1P CD276 CD274 IL21 TNFRSF13C HHLA2 IL23R TFRC AIF1 CD1D HLA-DMB CCL5 HLA-DPA1 IL12B CCL19 NCK1 NCK2 JAK2 ICOSLG IL10RA TNFRSF1B LILRB2…	0.00870252	#440154	0.5	0	12	1.53018
													215	8.17186	-2.13272	Cluster 0	Positive Regulation Of T Cell Receptor Signaling Pathway (GO:0050862)	CARD11 RELA CD81 LCK TESPA1 TRAT1 KCNN4 PRKD2 RPS3 CD226 RAB29 IKBKG NECTIN2 CARD11 CSK CYTH1 ARHGAP45 ARHGEF1 TMC6 HLA.A GPSM3 RUNX3 HLA.E LAPTM5 RASAL3 TGFB1 IKBKG CORO1A HCLS1 DENND1C RAC2 NLRC5 TNFRSF14 WIPF1 MYO1G LIMD2 SH3BP1 ARPC1B PPP1R18 SUN2 PRKD2 CD3E ARHGAP4 RASSF5 TMC8 NFKB2 OGFR EML3 ARHGAP30 GRK6 IKZF1 GMIP GRK2 TBC1D10C IL10RA TAP1 ITGAL HLA.B FMNL1 ABHD17A PTPN6 AKNA IL4R GLTSCR2…	0.198744	#440154	0.5	0	5	0.850853		215	8.17186	-2.13272	Cluster 0	Positive Regulation Of T Cell Receptor Signaling Pathway (GO:0050862)	CARD11 RELA CD81 LCK TESPA1 TRAT1 KCNN4 PRKD2 RPS3 CD226 RAB29 IKBKG NECTIN2 CARD11 CSK CYTH1 ARHGAP45 ARHGEF1 TMC6 HLA.A GPSM3 RUNX3 HLA.E LAPTM5 RASAL3 TGFB1 IKBKG CORO1A HCLS1 DENND1C RAC2 NLRC5 TNFRSF14 WIPF1 MYO1G LIMD2 SH3BP1 ARPC1B PPP1R18 SUN2 PRKD2 CD3E ARHGAP4 RASSF5 TMC8 NFKB2 OGFR EML3 ARHGAP30 GRK6 IKZF1 GMIP GRK2 TBC1D10C IL10RA TAP1 ITGAL HLA.B FMNL1 ABHD17A PTPN6 AKNA IL4R GLTSCR2…	0.0070769	#440154	0.5	0	12	1.57508
													216	9.42839	-0.97588	Cluster 0	Regulation Of Nucleotide-Binding Oligomerization Domain Containing 2 Signaling Pathway (GO:0070432)	ZNRF4 SLC15A3 HSPA1A PTPN22 SLC15A4 HSPA1B HSPA1A HSPA1B SLC15A3 SLC15A4 PTPN22 LAPTM5 PLEKHO2 PILRA PIK3R5 C5AR1 HCK NCF2 TNFRSF1B ITGAX CCR1 SIGLEC9 OSCAR ZNRF4 SPI1 IFI30 IRF5 MAN2B1 LYN CTSZ LCP1 TLR2 CD68 TYROBP PTAFR THEMIS2 ARAP1 NPL TCIRG1 HCLS1 PIK3AP1 CD53 CTSS MYO9B LILRB2 LITAF FGR PLEKHO1 LILRB3 PTPN6 LGALS9 CYBB LILRB4 MGAT1 VAV1 CYTH4 TYMP NOD2 ADAM8 EMILIN2 LILRB1 SLC11A1 LSP1 NCK…	1.78729e-12	#440154	0.5	0	12	6.3739		216	9.42839	-0.97588	Cluster 0	Regulation Of Nucleotide-Binding Oligomerization Domain Containing 2 Signaling Pathway (GO:0070432)	ZNRF4 SLC15A3 HSPA1A PTPN22 SLC15A4 HSPA1B HSPA1A HSPA1B SLC15A3 SLC15A4 PTPN22 LAPTM5 PLEKHO2 PILRA PIK3R5 C5AR1 HCK NCF2 TNFRSF1B ITGAX CCR1 SIGLEC9 OSCAR ZNRF4 SPI1 IFI30 IRF5 MAN2B1 LYN CTSZ LCP1 TLR2 CD68 TYROBP PTAFR THEMIS2 ARAP1 NPL TCIRG1 HCLS1 PIK3AP1 CD53 CTSS MYO9B LILRB2 LITAF FGR PLEKHO1 LILRB3 PTPN6 LGALS9 CYBB LILRB4 MGAT1 VAV1 CYTH4 TYMP NOD2 ADAM8 EMILIN2 LILRB1 SLC11A1 LSP1 NCK…	0.257333	#440154	0.5	0	5	0.794752
													217	8.44445	-1.76009	Cluster 0	Cellular Response To Prostaglandin E Stimulus (GO:0071380)	GNG2 GNB1 PTGER2 TNFSF4 PTGER4 SFRP1 PTGER2 PTGER4 GNB1 TNFSF4 GNG2 SFRP1 RASA3 GNAI2 TNFAIP3 PPP1R18 WIPF1 IL10RA SNN CLIP2 TLN1 MYO9B SUN2 TTYH3 WDR1 ATXN7L3 CXCR4 TGFB1 RASAL3 CAPZB MYO1G ZMIZ1 JUNB PIK3IP1 NDFIP1 PPP1R15A MSN STX11 SEPT9 TSC22D3 MCL1 PBXIP1 ZYX COTL1 CYTH1 KLF13 CD53 ZFP36 APP ACTR2 WDR82 MYH9 RASSF5 PBX2 SYNGAP1 TPM4 PPP1R9B KCNAB2 ANXA6 NLRP1 RIN3 RAPGEF1 FMNL1 MAX BTG1 ARL…	8.72985e-07	#440154	0.5	0	12	3.5295		217	8.44445	-1.76009	Cluster 0	Cellular Response To Prostaglandin E Stimulus (GO:0071380)	GNG2 GNB1 PTGER2 TNFSF4 PTGER4 SFRP1 PTGER2 PTGER4 GNB1 TNFSF4 GNG2 SFRP1 RASA3 GNAI2 TNFAIP3 PPP1R18 WIPF1 IL10RA SNN CLIP2 TLN1 MYO9B SUN2 TTYH3 WDR1 ATXN7L3 CXCR4 TGFB1 RASAL3 CAPZB MYO1G ZMIZ1 JUNB PIK3IP1 NDFIP1 PPP1R15A MSN STX11 SEPT9 TSC22D3 MCL1 PBXIP1 ZYX COTL1 CYTH1 KLF13 CD53 ZFP36 APP ACTR2 WDR82 MYH9 RASSF5 PBX2 SYNGAP1 TPM4 PPP1R9B KCNAB2 ANXA6 NLRP1 RIN3 RAPGEF1 FMNL1 MAX BTG1 ARL…	0.095765	#440154	0.5	0	5	1.0094
													218	8.14733	-0.984104	Cluster 0	Regulation Of Nucleocytoplasmic Transport (GO:0046822)	TGFB1 KHDRBS1 GSK3B NUP214 MX2 TMEM53 SIRT7 PTPN14 UHMK1 RBM4 BMP4 FRAT1 FRAT2 TPR IFI27 NEDD4 VASP XPO6 FRAT1 ZDHHC18 NADK FRAT2 TNFRSF10C CXCR1 FPR1 NBEAL2 MYO1F ADGRE5 SMAP2 NFAM1 CEACAM3 TRIM25 ELF4 FMNL1 CXCR2 ADAM8 LILRB3 R3HDM4 PBX2 TGFB1 ARAP1 C10ORF54 CSF2RB MX2 WAS ABTB1 MMP25 GLT1D1 NCF1B P2RY13 FPR2 ABCA7 EFHD2 NCF2 NCF1 CFP SPI1 GMIP GRK6 PPP1R18 FAM157A IL17RA HCK RASGRP4 SP1 SECTM1…	0.0064878	#440154	0.5	0	12	1.59395		218	8.14733	-0.984104	Cluster 0	Regulation Of Nucleocytoplasmic Transport (GO:0046822)	TGFB1 KHDRBS1 GSK3B NUP214 MX2 TMEM53 SIRT7 PTPN14 UHMK1 RBM4 BMP4 FRAT1 FRAT2 TPR IFI27 NEDD4 VASP XPO6 FRAT1 ZDHHC18 NADK FRAT2 TNFRSF10C CXCR1 FPR1 NBEAL2 MYO1F ADGRE5 SMAP2 NFAM1 CEACAM3 TRIM25 ELF4 FMNL1 CXCR2 ADAM8 LILRB3 R3HDM4 PBX2 TGFB1 ARAP1 C10ORF54 CSF2RB MX2 WAS ABTB1 MMP25 GLT1D1 NCF1B P2RY13 FPR2 ABCA7 EFHD2 NCF2 NCF1 CFP SPI1 GMIP GRK6 PPP1R18 FAM157A IL17RA HCK RASGRP4 SP1 SECTM1…	0.108463	#440154	0.5	0	5	0.98236
													219	9.8383	-2.18743	Cluster 0	Regulation Of Nuclease Activity (GO:0032069)	OAS2 OAS3 PDE3A OAS1 NEIL1 OASL OAS2 OAS1 OAS3 MX1 IFIT3 IFIT2 MX2 HELZ2 CMPK2 RSAD2 OASL DHX58 IFIT1 STAT1 IRF7 IFIH1 IFI44 EPSTI1 PARP10 CXCL11 IFI35 SAMD9 TAP1 TRIM22 IFI44L PARP12 TRIM25 ISG15 PARP14 SIGLEC1 IFI6 CXCL10 DTX3L DDX58 USP18 ISG20 ZNFX1 XAF1 TRAF1 IFNB1 SLAMF7 TNFSF10 PML HERC6 DDX60L RNF19B STAT2 DDX60 GBP4 APOBEC3A LILRB2 LAP3 SAMD9L LGALS9 PARP9 LY6E GBP1 IL27 TNIP1 CD274 NFKB…	3.51903e-08	#440154	0.5	0	12	4.22679		219	9.8383	-2.18743	Cluster 0	Regulation Of Nuclease Activity (GO:0032069)	OAS2 OAS3 PDE3A OAS1 NEIL1 OASL OAS2 OAS1 OAS3 MX1 IFIT3 IFIT2 MX2 HELZ2 CMPK2 RSAD2 OASL DHX58 IFIT1 STAT1 IRF7 IFIH1 IFI44 EPSTI1 PARP10 CXCL11 IFI35 SAMD9 TAP1 TRIM22 IFI44L PARP12 TRIM25 ISG15 PARP14 SIGLEC1 IFI6 CXCL10 DTX3L DDX58 USP18 ISG20 ZNFX1 XAF1 TRAF1 IFNB1 SLAMF7 TNFSF10 PML HERC6 DDX60L RNF19B STAT2 DDX60 GBP4 APOBEC3A LILRB2 LAP3 SAMD9L LGALS9 PARP9 LY6E GBP1 IL27 TNIP1 CD274 NFKB…	3.0399e-10	#440154	0.5	0	12	5.25857
													220	9.33048	-1.5878	Cluster 0	Positive Regulation Of T-helper 1 Type Immune Response (GO:0002827)	IL1B IL1R1 IL23A SLC11A1 IL23R NLRP10 XCL1 TBX21 IL12B IL18 IL12RB1 IL18R1 IL23A NFKB1 IL12RB1 IL1B TNFRSF1B PILRA SLC43A2 SLC11A1 IL18R1 NFKBIA LILRB2 PTGS2 NINJ1 IL12B PIK3R5 HCK IL4I1 ADGRE2 TLR2 ITGAX LCP2 TNFAIP8 HLA.E OSCAR IL10RA FGR VAV1 LILRA6 RNF19B IRAK2 C5AR1 PLAUR TRAF1 GBP2 THEMIS2 GPR84 SIGLEC9 ZC3H12A TNIP1 LILRB1 RASSF5 AQP9 TNFAIP2 APOBR LILRB3 CXCL8 ADORA2A CXCL3 TLR8 CYTH4 AMP…	2.07894e-15	#440154	0.5	0	12	7.84108		220	9.33048	-1.5878	Cluster 0	Positive Regulation Of T-helper 1 Type Immune Response (GO:0002827)	IL1B IL1R1 IL23A SLC11A1 IL23R NLRP10 XCL1 TBX21 IL12B IL18 IL12RB1 IL18R1 IL23A NFKB1 IL12RB1 IL1B TNFRSF1B PILRA SLC43A2 SLC11A1 IL18R1 NFKBIA LILRB2 PTGS2 NINJ1 IL12B PIK3R5 HCK IL4I1 ADGRE2 TLR2 ITGAX LCP2 TNFAIP8 HLA.E OSCAR IL10RA FGR VAV1 LILRA6 RNF19B IRAK2 C5AR1 PLAUR TRAF1 GBP2 THEMIS2 GPR84 SIGLEC9 ZC3H12A TNIP1 LILRB1 RASSF5 AQP9 TNFAIP2 APOBR LILRB3 CXCL8 ADORA2A CXCL3 TLR8 CYTH4 AMP…	0.224688	#440154	0.5	0	5	0.82421
													221	8.227	-0.704217	Cluster 0	Regulation Of Nitric-Oxide Synthase Biosynthetic Process (GO:0051769)	IL33 EDN1 GSTP1 NOD2 TLR2 NAMPT SELENOS IFNG KDR TLR9 TLR4 FCER2 JAK2 TLR4 TLR2 NCF2 TLR8 NOD2 LYN NAMPT HCK FPR2 CSF2RB LILRB3 TLR1 VNN2 THEMIS2 CTSS ITGAX AQP9 TREM1 RNF149 P2RY13 TNFRSF10C MNDA EVI2B GLT1D1 NCF1B SMAP2 FPR1 MXD1 CLEC7A C5AR1 TLR6 LITAF NFAM1 FGR ALOX5 MYO1F NCF1 ARAP1 VASP PTAFR NADK IL17RA LCP1 CLEC4E PROK2 STX11 LILRB2 ACSL1 FMNL1 SIRPB1 ARRB2 HCLS1 SIGLEC9 WAS ADAM8 SSH2 CX…	3.51903e-08	#440154	0.5	0	12	4.22679		221	8.227	-0.704217	Cluster 0	Regulation Of Nitric-Oxide Synthase Biosynthetic Process (GO:0051769)	IL33 EDN1 GSTP1 NOD2 TLR2 NAMPT SELENOS IFNG KDR TLR9 TLR4 FCER2 JAK2 TLR4 TLR2 NCF2 TLR8 NOD2 LYN NAMPT HCK FPR2 CSF2RB LILRB3 TLR1 VNN2 THEMIS2 CTSS ITGAX AQP9 TREM1 RNF149 P2RY13 TNFRSF10C MNDA EVI2B GLT1D1 NCF1B SMAP2 FPR1 MXD1 CLEC7A C5AR1 TLR6 LITAF NFAM1 FGR ALOX5 MYO1F NCF1 ARAP1 VASP PTAFR NADK IL17RA LCP1 CLEC4E PROK2 STX11 LILRB2 ACSL1 FMNL1 SIRPB1 ARRB2 HCLS1 SIGLEC9 WAS ADAM8 SSH2 CX…	0.0070769	#440154	0.5	0	12	1.57508
													222	9.16981	-0.630609	Cluster 0	Regulation Of Nitric Oxide Biosynthetic Process (GO:0045428)	SMAD3 INSR EDN1 PTGIS MMP8 HSP90AA1 CAV1 ATP2B4 KLF4 KLF2 ASS1 IL1B NOS1AP P2RX4 DDAH2 DDAH1 IFNG AGTR2 GLA AGXT2 CD47 TLR6 TLR4 ROCK2 HSP90AB1 HBB CX3CR1 CLU TNF PKD2 PTGS2 KHSRP ZC3H12A CLEC7A AKT1 SIRPA RAC1 CD36 JAK2 SIRPA TLR4 TLR2 ACSL1 LILRB2 TMEM127 NCF2 SBNO2 MYO9B HCK PFKFB3 BCL3 ARAP1 TRIM25 MGAT1 ZC3H12A STX11 VASP TNIP1 TNFAIP2 FOSL2 RNF19B ELF4 PILRA TLN1 AP5B1 MAPKAPK2 GNAI2 TNFRSF…	5.10659e-11	#440154	0.5	0	12	5.64593		222	9.16981	-0.630609	Cluster 0	Regulation Of Nitric Oxide Biosynthetic Process (GO:0045428)	SMAD3 INSR EDN1 PTGIS MMP8 HSP90AA1 CAV1 ATP2B4 KLF4 KLF2 ASS1 IL1B NOS1AP P2RX4 DDAH2 DDAH1 IFNG AGTR2 GLA AGXT2 CD47 TLR6 TLR4 ROCK2 HSP90AB1 HBB CX3CR1 CLU TNF PKD2 PTGS2 KHSRP ZC3H12A CLEC7A AKT1 SIRPA RAC1 CD36 JAK2 SIRPA TLR4 TLR2 ACSL1 LILRB2 TMEM127 NCF2 SBNO2 MYO9B HCK PFKFB3 BCL3 ARAP1 TRIM25 MGAT1 ZC3H12A STX11 VASP TNIP1 TNFAIP2 FOSL2 RNF19B ELF4 PILRA TLN1 AP5B1 MAPKAPK2 GNAI2 TNFRSF…	0.180605	#440154	0.5	0	5	0.871635
													223	8.50017	-2.00156	Cluster 0	Positive Regulation Of T-helper 17 Cell Differentiation (GO:2000321)	IL23A IL23R NFKBIZ IL12RB1 NFKBID MALT1 NFKBIZ NFKBID IL12RB1 IL23A NFKB1 MALT1 NFKBIA TNFAIP3 REL IL23R RASSF5 CYTIP BTG1 IL7R ZC3H12A LCP2 TNFAIP8 PIK3R5 IRF1 FNBP1 PRKCH RILPL2 CSRNP1 IL10RA NLRP3 CYTH1 RUNX3 SAMSN1 PPP1R15A STX11 TRAF1 CD53 MYO1G NFKB2 RHOH MAP3K8 TAP1 TNFRSF1B JAK3 STK17B LCP1 BCL2A1 NLRC5 ADGRE2 HCLS1 RHBDF2 TAGAP GPR132 FMNL1 CD83 CD37 SP100 LAPTM5 TNF DOCK2 IL21R CYLD PIL…	3.80152e-11	#440154	0.5	0	12	5.71002		223	8.50017	-2.00156	Cluster 0	Positive Regulation Of T-helper 17 Cell Differentiation (GO:2000321)	IL23A IL23R NFKBIZ IL12RB1 NFKBID MALT1 NFKBIZ NFKBID IL12RB1 IL23A NFKB1 MALT1 NFKBIA TNFAIP3 REL IL23R RASSF5 CYTIP BTG1 IL7R ZC3H12A LCP2 TNFAIP8 PIK3R5 IRF1 FNBP1 PRKCH RILPL2 CSRNP1 IL10RA NLRP3 CYTH1 RUNX3 SAMSN1 PPP1R15A STX11 TRAF1 CD53 MYO1G NFKB2 RHOH MAP3K8 TAP1 TNFRSF1B JAK3 STK17B LCP1 BCL2A1 NLRC5 ADGRE2 HCLS1 RHBDF2 TAGAP GPR132 FMNL1 CD83 CD37 SP100 LAPTM5 TNF DOCK2 IL21R CYLD PIL…	0.162797	#440154	0.5	0	5	0.894177
													224	8.57311	-1.43427	Cluster 0	Regulation Of Neutrophil Migration (GO:1902622)	FUT7 OLFM4 NCKAP1L MPP1 SLAMF8 RAC2 JAM3 FUT4 NCKAP1L LAPTM5 LGALS9 SPI1 HCLS1 FERMT3 RPS6KA1 RAC2 ARHGAP30 HCK PLCB2 GPSM3 WAS MAN2B1 ARRB2 LSP1 PLEKHO2 LCP1 STXBP2 PTPN6 IL17RA APOBR TCIRG1 THEMIS2 PARVG ITGAM HK3 GMIP ARHGAP4 ARAP1 DOCK2 FMNL1 NCF4 NCF2 EFHD2 NRROS SH3BP1 OSCAR ITGAX GRK2 CYTH4 C10ORF54 SYK DOK3 WIPF1 MYO1F FUT7 SIGLEC9 CD53 VASP CORO1A RHOG PRKCD TBXAS1 LYN CCR1 ARHGAP45 PILR…	5.83206e-08	#440154	0.5	0	12	4.11709		224	8.57311	-1.43427	Cluster 0	Regulation Of Neutrophil Migration (GO:1902622)	FUT7 OLFM4 NCKAP1L MPP1 SLAMF8 RAC2 JAM3 FUT4 NCKAP1L LAPTM5 LGALS9 SPI1 HCLS1 FERMT3 RPS6KA1 RAC2 ARHGAP30 HCK PLCB2 GPSM3 WAS MAN2B1 ARRB2 LSP1 PLEKHO2 LCP1 STXBP2 PTPN6 IL17RA APOBR TCIRG1 THEMIS2 PARVG ITGAM HK3 GMIP ARHGAP4 ARAP1 DOCK2 FMNL1 NCF4 NCF2 EFHD2 NRROS SH3BP1 OSCAR ITGAX GRK2 CYTH4 C10ORF54 SYK DOK3 WIPF1 MYO1F FUT7 SIGLEC9 CD53 VASP CORO1A RHOG PRKCD TBXAS1 LYN CCR1 ARHGAP45 PILR…	0.00636131	#440154	0.5	0	12	1.59823
													225	9.59511	-2.29618	Cluster 0	Cellular Response To Type I Interferon (GO:0071357)	IFNA14 STAT1 IFNA16 STAT2 IFNA17 TRAF3 TYK2 IFNW1 IFNE MYD88 MAVS OAS2 IFI27 TBKBP1 IFNK IFNAR1 IFNA10 IFNAR2 IFNA6 IFNA5 IFITM2 IFNA8 HDAC4 IFNA7 IFITM3 IFNA2 SP100 IFNA1 IFITM1 IFNA4 IFIT1 TANK TBK1 IRAK1 IFNB1 IKBKE JAK1 IFNA21 OAS2 MX2 MX1 OAS1 TAP1 OAS3 STAT1 TRIM25 HELZ2 IFIT3 PARP10 HLA.A STAT2 PARP14 TRIM22 HLA.B STAT6 IFIT2 CMPK2 SAMD9 HCK HLA.E LYN FMNL1 NLRC5 MYD88 DTX3L ARAP1 ELF4 HCL…	0.0720311	#440154	0.5	0	5	1.07124		225	9.59511	-2.29618	Cluster 0	Cellular Response To Type I Interferon (GO:0071357)	IFNA14 STAT1 IFNA16 STAT2 IFNA17 TRAF3 TYK2 IFNW1 IFNE MYD88 MAVS OAS2 IFI27 TBKBP1 IFNK IFNAR1 IFNA10 IFNAR2 IFNA6 IFNA5 IFITM2 IFNA8 HDAC4 IFNA7 IFITM3 IFNA2 SP100 IFNA1 IFITM1 IFNA4 IFIT1 TANK TBK1 IRAK1 IFNB1 IKBKE JAK1 IFNA21 OAS2 MX2 MX1 OAS1 TAP1 OAS3 STAT1 TRIM25 HELZ2 IFIT3 PARP10 HLA.A STAT2 PARP14 TRIM22 HLA.B STAT6 IFIT2 CMPK2 SAMD9 HCK HLA.E LYN FMNL1 NLRC5 MYD88 DTX3L ARAP1 ELF4 HCL…	0.000166336	#440154	0.5	0	12	2.38951
													226	8.74404	-1.96573	Cluster 0	Regulation Of Neutrophil Chemotaxis (GO:0090022)	CAMK1D CD74 DAPK2 NCKAP1L CCL21 XCL1 MPP1 TIRAP MCU CXCL8 RIPOR2 TNFAIP6 C5AR2 MOSPD2 DPP4 THBS4 MDK C1QBP SLIT2 RAC1 RAC2 CCR7 CCL19 JAM3 DNM1L HCK HLA.DRB1 LYN TAP1 LAPTM5 HCLS1 NCKAP1L LSP1 HLA.E LGALS9 RAC2 PILRA PTAFR TNFRSF1B GPSM3 ADGRE2 RHOG CD53 LCP1 CCL19 ITGAX PIK3R5 NCF2 CYTH4 WAS PLEKHO1 LILRB2 TLR2 IRF1 THEMIS2 ARRB2 FERMT3 WIPF1 HLA.B SECTM1 HLA.A CD74 NCF1 FMNL1 MX2 CSF2RB PTPN6 S…	2.69702e-06	#440154	0.5	0	12	3.28456		226	8.74404	-1.96573	Cluster 0	Regulation Of Neutrophil Chemotaxis (GO:0090022)	CAMK1D CD74 DAPK2 NCKAP1L CCL21 XCL1 MPP1 TIRAP MCU CXCL8 RIPOR2 TNFAIP6 C5AR2 MOSPD2 DPP4 THBS4 MDK C1QBP SLIT2 RAC1 RAC2 CCR7 CCL19 JAM3 DNM1L HCK HLA.DRB1 LYN TAP1 LAPTM5 HCLS1 NCKAP1L LSP1 HLA.E LGALS9 RAC2 PILRA PTAFR TNFRSF1B GPSM3 ADGRE2 RHOG CD53 LCP1 CCL19 ITGAX PIK3R5 NCF2 CYTH4 WAS PLEKHO1 LILRB2 TLR2 IRF1 THEMIS2 ARRB2 FERMT3 WIPF1 HLA.B SECTM1 HLA.A CD74 NCF1 FMNL1 MX2 CSF2RB PTPN6 S…	0.0070769	#440154	0.5	0	12	1.57508
													227	8.65463	-1.3034	Cluster 0	Cellular Response To Type III Interferon (GO:0071358)	IFNL1 IFNL3 IFNL2 IFNGR1 IFNGR2 IL10RB IFNLR1 TYK2 IFNL4 JAK1 IL10RB IFNGR2 HCK NCF2 ARAP1 TCIRG1 STAT6 LAPTM5 THEMIS2 ITGAX FMNL1 TYK2 LYN PIK3R5 ARHGAP30 FGR VASP CYTH4 CTSS HCLS1 APOBR SPI1 TLR2 HLA.E LCP1 ARRB2 CSF2RB HLA.A IFNGR1 ADAM8 HLA.B PRKCD WAS TNFRSF1B PTAFR GMIP PLEKHO2 EFHD2 MYO1F RPS6KA1 ALOX5 ARHGAP27 LRRC25 IL17RA PLCB2 PILRA LILRB3 NADK ARHGAP45 GPSM3 C10ORF54 SIGLEC9 TLR8 CYTH…	0.000100324	#440154	0.5	0	12	2.4993		227	8.65463	-1.3034	Cluster 0	Cellular Response To Type III Interferon (GO:0071358)	IFNL1 IFNL3 IFNL2 IFNGR1 IFNGR2 IL10RB IFNLR1 TYK2 IFNL4 JAK1 IL10RB IFNGR2 HCK NCF2 ARAP1 TCIRG1 STAT6 LAPTM5 THEMIS2 ITGAX FMNL1 TYK2 LYN PIK3R5 ARHGAP30 FGR VASP CYTH4 CTSS HCLS1 APOBR SPI1 TLR2 HLA.E LCP1 ARRB2 CSF2RB HLA.A IFNGR1 ADAM8 HLA.B PRKCD WAS TNFRSF1B PTAFR GMIP PLEKHO2 EFHD2 MYO1F RPS6KA1 ALOX5 ARHGAP27 LRRC25 IL17RA PLCB2 PILRA LILRB3 NADK ARHGAP45 GPSM3 C10ORF54 SIGLEC9 TLR8 CYTH…	0.180605	#440154	0.5	0	5	0.871635
													228	8.48074	-1.55041	Cluster 0	Positive Regulation Of T-helper 17 Type Immune Response (GO:2000318)	IL23R NFKBIZ TYK2 MALT1 CLEC7A IL23A NLRP10 CLEC6A IL12B PRKCQ IL12RB1 NFKBID JAK2 LYN TLR8 THEMIS2 FMNL1 LCP1 PIK3R5 CTSS HCLS1 HCK CLEC7A RASSF5 STX11 IL10RA DOCK8 NCF2 AOAH NOD2 CYTH1 TLR2 ARHGAP30 WIPF1 DOCK2 ITGAX HLA.E PTPRC TNFRSF1B IRF1 PTAFR FGR MPEG1 LAPTM5 LCP2 LILRB2 CYTH4 EVI2B MYO1G CD53 NLRC5 PLCB2 ARRB2 ADGRE2 PILRA SMAP2 ADCY7 GBP2 LILRB3 CSF2RB ARHGAP45 AKNA IL17RA PIK3CD SLC12A…	3.51903e-08	#440154	0.5	0	12	4.22679		228	8.48074	-1.55041	Cluster 0	Positive Regulation Of T-helper 17 Type Immune Response (GO:2000318)	IL23R NFKBIZ TYK2 MALT1 CLEC7A IL23A NLRP10 CLEC6A IL12B PRKCQ IL12RB1 NFKBID JAK2 LYN TLR8 THEMIS2 FMNL1 LCP1 PIK3R5 CTSS HCLS1 HCK CLEC7A RASSF5 STX11 IL10RA DOCK8 NCF2 AOAH NOD2 CYTH1 TLR2 ARHGAP30 WIPF1 DOCK2 ITGAX HLA.E PTPRC TNFRSF1B IRF1 PTAFR FGR MPEG1 LAPTM5 LCP2 LILRB2 CYTH4 EVI2B MYO1G CD53 NLRC5 PLCB2 ARRB2 ADGRE2 PILRA SMAP2 ADCY7 GBP2 LILRB3 CSF2RB ARHGAP45 AKNA IL17RA PIK3CD SLC12A…	0.0154774	#440154	0.5	0	12	1.40515
													229	9.56925	-2.32874	Cluster 0	Cellular Response To Virus (GO:0098586)	GSDME POU2F2 EIF5A HSP90AA1 IL10RB POU2AF1 IFNLR1 OAS1 TYK2 MAPK14 MAPK11 CXCL10 IFNE IL6 IRF5 IRF3 IFNG BAX IFNK PYDC5 DDX3X VWCE IFI6 IFNL1 IFNL3 IFNL2 NLRP3 IFNL4 IFNA14 IFNGR1 GBF1 IFNA16 IFNGR2 CHUK IFNA17 TOMM70 RRP1B IRGM IFNW1 IFNAR1 IFNA10 IFNAR2 IFNA6 IFNA5 IFNA8 IL21 IFNA7 IFNA2 IFNA1 FMR1 IFNA4 HIF1A IFIH1 ZC3H12A CCL5 IFNB1 RIOK3 IL12A CCL19 LGALS9 LGALS8 JAK1 IFNA21 JAK2 OAS2 TRIM25…	0.0064878	#440154	0.5	0	12	1.59395		229	9.56925	-2.32874	Cluster 0	Cellular Response To Virus (GO:0098586)	GSDME POU2F2 EIF5A HSP90AA1 IL10RB POU2AF1 IFNLR1 OAS1 TYK2 MAPK14 MAPK11 CXCL10 IFNE IL6 IRF5 IRF3 IFNG BAX IFNK PYDC5 DDX3X VWCE IFI6 IFNL1 IFNL3 IFNL2 NLRP3 IFNL4 IFNA14 IFNGR1 GBF1 IFNA16 IFNGR2 CHUK IFNA17 TOMM70 RRP1B IRGM IFNW1 IFNAR1 IFNA10 IFNAR2 IFNA6 IFNA5 IFNA8 IL21 IFNA7 IFNA2 IFNA1 FMR1 IFNA4 HIF1A IFIH1 ZC3H12A CCL5 IFNB1 RIOK3 IL12A CCL19 LGALS9 LGALS8 JAK1 IFNA21 JAK2 OAS2 TRIM25…	0.279944	#440154	0.5	0	5	0.776464
													230	8.74216	-1.11936	Cluster 0	Positive Regulation Of T-helper 2 Cell Differentiation (GO:0045630)	PRKCZ TNFSF4 NLRP3 RARA IL18 RARA NLRP3 IL18 TNFSF4 STX11 PRKCZ TREM1 THEMIS2 ARRB2 FCN1 FMNL1 C10ORF54 FGR STXBP2 HCK CFP NOD2 C5AR1 SPI1 CAMTA2 WAS TLR2 PRKCD EFHD2 LILRB3 ARAP1 GLT1D1 LILRA1 CD300LB C19ORF38 AOAH APOBR TBXAS1 PLCB2 SIRPA LILRB2 MYO1F FBRS ITGAX WBP2 HLA.E GPSM3 LIPN ADAM8 LYN LAPTM5 LRRC25 KIAA0513 MPEG1 NFAM1 AP5B1 OSCAR KDM6B TNFRSF1B TGFB1 SIGLEC9 ABTB1 CTSS NCF2 ELF4 MCL1 …	5.83206e-08	#440154	0.5	0	12	4.11709		230	8.74216	-1.11936	Cluster 0	Positive Regulation Of T-helper 2 Cell Differentiation (GO:0045630)	PRKCZ TNFSF4 NLRP3 RARA IL18 RARA NLRP3 IL18 TNFSF4 STX11 PRKCZ TREM1 THEMIS2 ARRB2 FCN1 FMNL1 C10ORF54 FGR STXBP2 HCK CFP NOD2 C5AR1 SPI1 CAMTA2 WAS TLR2 PRKCD EFHD2 LILRB3 ARAP1 GLT1D1 LILRA1 CD300LB C19ORF38 AOAH APOBR TBXAS1 PLCB2 SIRPA LILRB2 MYO1F FBRS ITGAX WBP2 HLA.E GPSM3 LIPN ADAM8 LYN LAPTM5 LRRC25 KIAA0513 MPEG1 NFAM1 AP5B1 OSCAR KDM6B TNFRSF1B TGFB1 SIGLEC9 ABTB1 CTSS NCF2 ELF4 MCL1 …	0.268561	#440154	0.5	0	5	0.785478
													231	9.46581	-1.20053	Cluster 0	Positive Regulation Of T-helper Cell Differentiation (GO:0045624)	CD86 PRKCZ TNFSF4 CD80 NLRP3 NFKBIZ RARA IL18 CCL19 NFKBID SOCS5 MALT1 STX11 NFKBIZ NLRP3 CD86 LILRB2 NOD2 PIK3R5 CD83 LYN ZC3H12A CD80 PILRA IL10RA TNFRSF1B RNF19B NFKB1 LAPTM5 HCK NFKB2 THEMIS2 TRAF1 LILRA3 BCL3 MYO1G PLEK TNIP1 LILRB1 TLR2 LGALS9 MYO9B FCER1G ELF4 RELB EMILIN2 SLC15A3 MPEG1 PRKCD PIK3AP1 CSRNP1 TNFAIP2 NINJ1 TAP1 CYTH1 CTSS IRF5 NFKBIE CD53 PLEKHO2 SLC43A2 DOCK2 C3AR1 C5AR1 FM…	1.89344e-13	#440154	0.5	0	12	6.86137		231	9.46581	-1.20053	Cluster 0	Positive Regulation Of T-helper Cell Differentiation (GO:0045624)	CD86 PRKCZ TNFSF4 CD80 NLRP3 NFKBIZ RARA IL18 CCL19 NFKBID SOCS5 MALT1 STX11 NFKBIZ NLRP3 CD86 LILRB2 NOD2 PIK3R5 CD83 LYN ZC3H12A CD80 PILRA IL10RA TNFRSF1B RNF19B NFKB1 LAPTM5 HCK NFKB2 THEMIS2 TRAF1 LILRA3 BCL3 MYO1G PLEK TNIP1 LILRB1 TLR2 LGALS9 MYO9B FCER1G ELF4 RELB EMILIN2 SLC15A3 MPEG1 PRKCD PIK3AP1 CSRNP1 TNFAIP2 NINJ1 TAP1 CYTH1 CTSS IRF5 NFKBIE CD53 PLEKHO2 SLC43A2 DOCK2 C3AR1 C5AR1 FM…	0.101995	#440154	0.5	0	5	0.995711
													232	8.31022	-0.528948	Cluster 0	Regulation Of Necroptotic Process (GO:0060544)	PRKN SLC25A4 RIPK3 PARP1 CFLAR SPATA2 FZD9 YBX3 ITCH CASP8 CYLD CASP6 AIFM1 PELI1 IGF2BP1 ARHGEF2 OGT RIPK1 BIRC2 BIRC3 CYTH1 PTPRC DOCK2 LYN SMCHD1 FAM129A PELI1 CYLD STK4 DOCK8 SSH2 EHBP1L1 MCL1 CFLAR NLRC5 WIPF1 ARHGAP30 AKNA ARAP1 KLF13 FMNL1 NCF2 HCLS1 TRAPPC10 LCP1 RNF213 ELF4 TLR8 XPO6 SMAP2 ARHGEF2 IL10RA ARHGAP45 GBP2 PIK3R5 RASSF5 THEMIS2 PPTC7 IGF2R SORL1 IKZF1 FAM65B RNF149 PARP14 STA…	1.67695e-05	#440154	0.5	0	12	2.88774		232	8.31022	-0.528948	Cluster 0	Regulation Of Necroptotic Process (GO:0060544)	PRKN SLC25A4 RIPK3 PARP1 CFLAR SPATA2 FZD9 YBX3 ITCH CASP8 CYLD CASP6 AIFM1 PELI1 IGF2BP1 ARHGEF2 OGT RIPK1 BIRC2 BIRC3 CYTH1 PTPRC DOCK2 LYN SMCHD1 FAM129A PELI1 CYLD STK4 DOCK8 SSH2 EHBP1L1 MCL1 CFLAR NLRC5 WIPF1 ARHGAP30 AKNA ARAP1 KLF13 FMNL1 NCF2 HCLS1 TRAPPC10 LCP1 RNF213 ELF4 TLR8 XPO6 SMAP2 ARHGEF2 IL10RA ARHGAP45 GBP2 PIK3R5 RASSF5 THEMIS2 PPTC7 IGF2R SORL1 IKZF1 FAM65B RNF149 PARP14 STA…	0.257333	#440154	0.5	0	5	0.794752
													233	8.64229	-1.76025	Cluster 0	Regulation Of Natural Killer Cell Proliferation (GO:0032817)	IL23A IL23R LEP PTPN22 IL12B IL18 TYK2 HLA-E JAK2 IL23A IL12B PTPN22 JAK2 TYK2 NFKB1 IL10RA LYN HCLS1 HLA.E LCP1 RASSF5 DOCK8 THEMIS2 CD53 TLR8 CYTH1 GBP2 HCK LAPTM5 DOCK2 TCIRG1 MYO1G CYTH4 FMNL1 PTPN6 ADCY7 LGALS9 STX11 NCKAP1L ARHGAP30 TNFRSF1B WIPF1 PIK3AP1 PIK3R5 AOAH ARHGAP25 PARVG TNIP1 TAP1 PTPRC FGR NLRC5 LSP1 IL18 STAT6 PLCB2 LCP2 NOD2 CD86 APOBR LILRB2 STAT5A IL23R PILRA APBB1IP PRKCD …	4.95228e-08	#440154	0.5	0	12	4.1526		233	8.64229	-1.76025	Cluster 0	Regulation Of Natural Killer Cell Proliferation (GO:0032817)	IL23A IL23R LEP PTPN22 IL12B IL18 TYK2 HLA-E JAK2 IL23A IL12B PTPN22 JAK2 TYK2 NFKB1 IL10RA LYN HCLS1 HLA.E LCP1 RASSF5 DOCK8 THEMIS2 CD53 TLR8 CYTH1 GBP2 HCK LAPTM5 DOCK2 TCIRG1 MYO1G CYTH4 FMNL1 PTPN6 ADCY7 LGALS9 STX11 NCKAP1L ARHGAP30 TNFRSF1B WIPF1 PIK3AP1 PIK3R5 AOAH ARHGAP25 PARVG TNIP1 TAP1 PTPRC FGR NLRC5 LSP1 IL18 STAT6 PLCB2 LCP2 NOD2 CD86 APOBR LILRB2 STAT5A IL23R PILRA APBB1IP PRKCD …	0.00510563	#440154	0.5	0	12	1.64598
													234	8.4695	-2.28602	Cluster 0	Regulation Of Natural Killer Cell Mediated Immunity (GO:0002715)	LEP NCR1 SH2D1B KLRB1 PIK3R6 SH2D1B KLRB1 NCR1 AMFR PTGDR RNF168 IL2RB NFKBIA GIMAP6 RPS14P8 LEP TRDC KLRC1 PIK3R6 TSC22D3 DUSP1 TNFRSF18 CTSW SCML4 PPP1R15A IL7R CD300LF TXK CD96 SASH3 CD200R1 PLEKHF1 PLIN1 RP3.499B10.3 PIM2 BTG1 IL4I1 ACTBP6 TUSC5 SLAMF6 JAML LY9 KLRF1 TNFSF11 IL23R ADIPOQ GOT2P3 AC000367.1 AD000671.6 EFCAB8 CD247 CIDEC IL16 KRT86 LIPE CXCR4 TNFAIP3 RP11.494K3.2 RP11.217O12.1 T…	0.000147438	#440154	0.5	0	12	2.41569		234	8.4695	-2.28602	Cluster 0	Regulation Of Natural Killer Cell Mediated Immunity (GO:0002715)	LEP NCR1 SH2D1B KLRB1 PIK3R6 SH2D1B KLRB1 NCR1 AMFR PTGDR RNF168 IL2RB NFKBIA GIMAP6 RPS14P8 LEP TRDC KLRC1 PIK3R6 TSC22D3 DUSP1 TNFRSF18 CTSW SCML4 PPP1R15A IL7R CD300LF TXK CD96 SASH3 CD200R1 PLEKHF1 PLIN1 RP3.499B10.3 PIM2 BTG1 IL4I1 ACTBP6 TUSC5 SLAMF6 JAML LY9 KLRF1 TNFSF11 IL23R ADIPOQ GOT2P3 AC000367.1 AD000671.6 EFCAB8 CD247 CIDEC IL16 KRT86 LIPE CXCR4 TNFAIP3 RP11.494K3.2 RP11.217O12.1 T…	0.029166	#440154	0.5	0	12	1.26756
													235	8.85899	-0.929432	Cluster 0	Regulation Of Myoblast Fusion (GO:1901739)	CD53 RIPOR2 MYOG CFLAR TMEM182 MYOD1 EHD1 MAPK14 EHD2 IL4 PLEKHO1 SCGB3A1 FLOT1 EHBP1L1 EHD1 HCK PPP1R18 PLEKHO1 ARAP1 CFLAR TNFRSF1B TNIP1 NCF2 LILRB3 VASP LYN LILRB2 EFHD2 TLR2 LITAF GNAI2 PILRA MVP ADGRE5 ITGAX HLA.E MGAT1 THEMIS2 SBNO2 STAT6 FMNL1 MYO9B TLR8 TCIRG1 HLA.A PRKCD OSCAR ANXA11 PIK3R5 BCL3 DYSF TYMP SPI1 C10ORF54 TLN1 TGFB1 CYTH4 CD53 HCLS1 WIPF1 STK40 ADAM8 NCF1B UNC93B1 ADGRE2 I…	0.000100324	#440154	0.5	0	12	2.4993		235	8.85899	-0.929432	Cluster 0	Regulation Of Myoblast Fusion (GO:1901739)	CD53 RIPOR2 MYOG CFLAR TMEM182 MYOD1 EHD1 MAPK14 EHD2 IL4 PLEKHO1 SCGB3A1 FLOT1 EHBP1L1 EHD1 HCK PPP1R18 PLEKHO1 ARAP1 CFLAR TNFRSF1B TNIP1 NCF2 LILRB3 VASP LYN LILRB2 EFHD2 TLR2 LITAF GNAI2 PILRA MVP ADGRE5 ITGAX HLA.E MGAT1 THEMIS2 SBNO2 STAT6 FMNL1 MYO9B TLR8 TCIRG1 HLA.A PRKCD OSCAR ANXA11 PIK3R5 BCL3 DYSF TYMP SPI1 C10ORF54 TLN1 TGFB1 CYTH4 CD53 HCLS1 WIPF1 STK40 ADAM8 NCF1B UNC93B1 ADGRE2 I…	0.0154774	#440154	0.5	0	12	1.40515
													236	8.30885	-1.25215	Cluster 0	Regulation Of Myeloid Leukocyte Mediated Immunity (GO:0002886)	C12ORF4 LYN UNC13D FES FER DNASE1 SYK STXBP2 DNASE1L3 SYK STXBP2 LYN UNC13D WAS MYO1F FMNL1 PLCB2 C10ORF54 HCK SPI1 GPSM3 THEMIS2 LRRC25 ARRB2 CFP HCLS1 FES NFAM1 PTPN6 APOBR ARHGAP30 FGR NCF2 ARHGAP45 ALOX5 IL17RA LILRB3 ITGAX ARAP1 DOK3 LAPTM5 ARHGAP27 CYTH4 CSF2RB PARVG NCF4 ADAM8 NCF1B ARHGAP4 RIN3 NCF1 GMIP LCP1 CCDC88B GRK2 TCIRG1 LSP1 ADGRE5 CORO1A PTAFR HLA.E LILRA2 RASGRP4 APBB1IP EVI2B …	5.44738e-07	#440154	0.5	0	12	3.63191		236	8.30885	-1.25215	Cluster 0	Regulation Of Myeloid Leukocyte Mediated Immunity (GO:0002886)	C12ORF4 LYN UNC13D FES FER DNASE1 SYK STXBP2 DNASE1L3 SYK STXBP2 LYN UNC13D WAS MYO1F FMNL1 PLCB2 C10ORF54 HCK SPI1 GPSM3 THEMIS2 LRRC25 ARRB2 CFP HCLS1 FES NFAM1 PTPN6 APOBR ARHGAP30 FGR NCF2 ARHGAP45 ALOX5 IL17RA LILRB3 ITGAX ARAP1 DOK3 LAPTM5 ARHGAP27 CYTH4 CSF2RB PARVG NCF4 ADAM8 NCF1B ARHGAP4 RIN3 NCF1 GMIP LCP1 CCDC88B GRK2 TCIRG1 LSP1 ADGRE5 CORO1A PTAFR HLA.E LILRA2 RASGRP4 APBB1IP EVI2B …	0.029166	#440154	0.5	0	12	1.26756
													237	9.94027	-1.07545	Cluster 0	Regulation Of Myeloid Leukocyte Differentiation (GO:0002761)	FOXP1 CEBPB PRXL2A CAMK4 IRF7 UBASH3B MTOR IRF7 CEBPB UBASH3B SBNO2 PIK3R5 EHD1 TNFRSF1B CAMK4 HELZ2 TNIP1 OGFR MYO9B NFKB2 RELB LILRB2 SLC15A3 PILRA BCL3 ELL TRIM25 MX2 PARP12 TYMP HCK NINJ1 CYTH1 PPP1R18 RNF19B IL10RA OSCAR TCIRG1 RAPGEF1 IRF1 AP5B1 UNC93B1 FMNL1 MGAT1 TLR2 DHX58 AMPD3 MAPKAPK2 PARP10 NCF2 ELF4 ITGAX ZC3H12A ARAP1 PIM3 ARHGEF2 CHST11 TGFB1 SPI1 VASP ARHGAP45 NLRC5 LILRB3 PLAUR …	3.67441e-10	#440154	0.5	0	12	5.21741		237	9.94027	-1.07545	Cluster 0	Regulation Of Myeloid Leukocyte Differentiation (GO:0002761)	FOXP1 CEBPB PRXL2A CAMK4 IRF7 UBASH3B MTOR IRF7 CEBPB UBASH3B SBNO2 PIK3R5 EHD1 TNFRSF1B CAMK4 HELZ2 TNIP1 OGFR MYO9B NFKB2 RELB LILRB2 SLC15A3 PILRA BCL3 ELL TRIM25 MX2 PARP12 TYMP HCK NINJ1 CYTH1 PPP1R18 RNF19B IL10RA OSCAR TCIRG1 RAPGEF1 IRF1 AP5B1 UNC93B1 FMNL1 MGAT1 TLR2 DHX58 AMPD3 MAPKAPK2 PARP10 NCF2 ELF4 ITGAX ZC3H12A ARAP1 PIM3 ARHGEF2 CHST11 TGFB1 SPI1 VASP ARHGAP45 NLRC5 LILRB3 PLAUR …	0.268561	#440154	0.5	0	5	0.785478
													238	8.42128	-1.27683	Cluster 0	Regulation Of Myeloid Cell Differentiation (GO:0045637)	PRMT6 LYN HSPA9 RBM15 MEF2C ZBTB16 PRMT1 PEX2 MAFB SKIC8 FES MEIS2 EIF6 MEIS1 CDK6 CNOT4 HOXB8 L3MBTL1 SPI1 CSF3 CTR9 PURB HOXA9 PTK2B LEO1 HOXA5 FES LYN HOXA9 NRROS SPI1 PTPN6 H2AFY DOCK2 C15ORF39 RIN3 PTK2B DOK3 MYO1G BTK IRF5 RELT NCKAP1L LAPTM5 AP5B1 NCF4 SYK PARVG ADGRE2 GRK2 FMNL1 ELF4 FERMT3 LCP1 THEMIS2 HCK TBXAS1 HOXA5 GMIP LGALS9 WAS GNA15 UNC13D PLCB2 P2RX1 OSCAR CSK ARRB2 SHKBP1 ADAM8…	1.56064e-05	#440154	0.5	0	12	2.90335		238	8.42128	-1.27683	Cluster 0	Regulation Of Myeloid Cell Differentiation (GO:0045637)	PRMT6 LYN HSPA9 RBM15 MEF2C ZBTB16 PRMT1 PEX2 MAFB SKIC8 FES MEIS2 EIF6 MEIS1 CDK6 CNOT4 HOXB8 L3MBTL1 SPI1 CSF3 CTR9 PURB HOXA9 PTK2B LEO1 HOXA5 FES LYN HOXA9 NRROS SPI1 PTPN6 H2AFY DOCK2 C15ORF39 RIN3 PTK2B DOK3 MYO1G BTK IRF5 RELT NCKAP1L LAPTM5 AP5B1 NCF4 SYK PARVG ADGRE2 GRK2 FMNL1 ELF4 FERMT3 LCP1 THEMIS2 HCK TBXAS1 HOXA5 GMIP LGALS9 WAS GNA15 UNC13D PLCB2 P2RX1 OSCAR CSK ARRB2 SHKBP1 ADAM8…	0.0104612	#440154	0.5	0	12	1.49021
													239	9.15472	-0.529866	Cluster 0	Positive Regulation Of Amyloid-Beta Formation (GO:1902004)	RELA GSK3A IFNGR1 ROCK2 CHRNA7 SLC2A13 PSG1 CLU TNF PICALM EFNA1 LRRTM3 IFNG CASP3 ABCG1 GSAP EPHA4 IFNGR1 PICALM ABCG1 SIRPA GSAP OGFRL1 SUSD6 SLC2A13 SLC43A2 RNF19B CD274 EFNA1 DENND5A TNF TMEM127 PSAP NCF2 CLU ATP6V1B2 CHST15 TLR4 PFKFB3 SOD2 TLR2 KDM7A ITM2B ICAM1 EPB41L3 ARHGEF11 PILRA N4BP1 NINJ1 IL13RA1 HCK GAS7 TLR8 ACSL1 DOCK4 CTSS LRRTM3 NPL TNFAIP2 ZC3H12A GK CCR5 CD68 CCR1 FNIP2 GNS H…	1.41612e-11	#440154	0.5	0	12	5.92445		239	9.15472	-0.529866	Cluster 0	Positive Regulation Of Amyloid-Beta Formation (GO:1902004)	RELA GSK3A IFNGR1 ROCK2 CHRNA7 SLC2A13 PSG1 CLU TNF PICALM EFNA1 LRRTM3 IFNG CASP3 ABCG1 GSAP EPHA4 IFNGR1 PICALM ABCG1 SIRPA GSAP OGFRL1 SUSD6 SLC2A13 SLC43A2 RNF19B CD274 EFNA1 DENND5A TNF TMEM127 PSAP NCF2 CLU ATP6V1B2 CHST15 TLR4 PFKFB3 SOD2 TLR2 KDM7A ITM2B ICAM1 EPB41L3 ARHGEF11 PILRA N4BP1 NINJ1 IL13RA1 HCK GAS7 TLR8 ACSL1 DOCK4 CTSS LRRTM3 NPL TNFAIP2 ZC3H12A GK CCR5 CD68 CCR1 FNIP2 GNS H…	0.435612	#440154	0.5	0	5	0.68045
													240	8.47548	-1.11211	Cluster 0	Granulocyte Differentiation (GO:0030851)	LEF1 CEBPA LYN JAGN1 CSF3 CEBPE CLPB TAL1 SRP54 LBR GATA1 STAT5A STAT5A LYN TAL1 MPP1 UNC13D PIM1 STXBP2 LBR FERMT3 RHOG NCKAP1L HCK STAT5B DOCK2 STK40 ELF4 LCP1 NRROS TNFRSF1B IKZF1 RPS6KA1 BTK ARAP1 SMAP2 HCLS1 GATA1 SPN NCF2 AP5B1 GRK2 GRK6 LAPTM5 MYO1G VASP WAS FMNL1 CSF2RB GPSM3 THEMIS2 SPI1 CHST11 NFE2 IL17RA PLCB2 PRKCD MAN2B1 NADK ARHGAP30 APOBR DOK3 ARRB2 PIK3R5 WIPF1 CCND3 LILRB2 NCF4 O…	1.58164e-07	#440154	0.5	0	12	3.90045		240	8.47548	-1.11211	Cluster 0	Granulocyte Differentiation (GO:0030851)	LEF1 CEBPA LYN JAGN1 CSF3 CEBPE CLPB TAL1 SRP54 LBR GATA1 STAT5A STAT5A LYN TAL1 MPP1 UNC13D PIM1 STXBP2 LBR FERMT3 RHOG NCKAP1L HCK STAT5B DOCK2 STK40 ELF4 LCP1 NRROS TNFRSF1B IKZF1 RPS6KA1 BTK ARAP1 SMAP2 HCLS1 GATA1 SPN NCF2 AP5B1 GRK2 GRK6 LAPTM5 MYO1G VASP WAS FMNL1 CSF2RB GPSM3 THEMIS2 SPI1 CHST11 NFE2 IL17RA PLCB2 PRKCD MAN2B1 NADK ARHGAP30 APOBR DOK3 ARRB2 PIK3R5 WIPF1 CCND3 LILRB2 NCF4 O…	0.000299548	#440154	0.5	0	12	2.26177
													241	9.06782	-0.920087	Cluster 0	Granulocyte Migration (GO:0097530)	CD177 ITGB2 ANXA1 GP2 CCL3 EMP2 IRAK4 UMOD JAM3 ITGB2 IRAK4 CD177 ANXA1 CCL3 HK3 GP2 UMOD SIGLEC9 KCNJ1 AQP2 SLC12A1 MCEMP1 LILRA5 S100A12 S100A8 SNX20 OSCAR S100A9 LILRA6 EGF EMP2 CELA2A LILRB2 LILRB3 CLCNKA PRSS3P2 PNLIPRP1 GSDMD AMY2A SQRDL SLC34A1 PNLIP ITGAM HCK TNFRSF1B STX11 CELA2B PLA2G1B CELA3A CDH16 CCL3L3 CELA3B PLBD1 FGR FCER1G CD4 TYROBP REG3G CUZD1 GPR84 PILRA ITGAX ADGRE2 GLIPR2 TY…	0.00656998	#440154	0.5	0	12	1.59122		241	9.06782	-0.920087	Cluster 0	Granulocyte Migration (GO:0097530)	CD177 ITGB2 ANXA1 GP2 CCL3 EMP2 IRAK4 UMOD JAM3 ITGB2 IRAK4 CD177 ANXA1 CCL3 HK3 GP2 UMOD SIGLEC9 KCNJ1 AQP2 SLC12A1 MCEMP1 LILRA5 S100A12 S100A8 SNX20 OSCAR S100A9 LILRA6 EGF EMP2 CELA2A LILRB2 LILRB3 CLCNKA PRSS3P2 PNLIPRP1 GSDMD AMY2A SQRDL SLC34A1 PNLIP ITGAM HCK TNFRSF1B STX11 CELA2B PLA2G1B CELA3A CDH16 CCL3L3 CELA3B PLBD1 FGR FCER1G CD4 TYROBP REG3G CUZD1 GPR84 PILRA ITGAX ADGRE2 GLIPR2 TY…	0.352396	#440154	0.5	0	5	0.726484
													242	8.40016	-1.58837	Cluster 0	Growth Hormone Receptor Signaling Pathway (GO:0060396)	PTPN1 STAT5B LYN PXN STAT3 CSH2 CSHL1 GH1 PTK2 GHR GH2 SOCS2 PIK3R1 STAT6 JAK3 STAT5A JAK2 STAT5B STAT6 FMNL1 LYN SMAP2 CYTH1 ARAP1 ADGRE5 HLA.E CSF2RB WIPF1 HCK NBEAL2 THEMIS2 ARHGAP45 ARHGAP30 AKNA ELF4 C10ORF54 EHBP1L1 HCLS1 MYO1F WAS NCF2 HLA.B GMIP NLRC5 DOCK8 LILRB3 NADK VASP PPP1R18 TRIM25 STAT5A SBNO2 GRK2 ARHGEF1 CDC42SE1 ARHGAP27 TLR8 HLA.A ITGAX ADAM8 SUN2 GPSM3 PIK3CD PLCB2 RASSF5 UNC…	0.000321955	#440154	0.5	0	12	2.2461		242	8.40016	-1.58837	Cluster 0	Growth Hormone Receptor Signaling Pathway (GO:0060396)	PTPN1 STAT5B LYN PXN STAT3 CSH2 CSHL1 GH1 PTK2 GHR GH2 SOCS2 PIK3R1 STAT6 JAK3 STAT5A JAK2 STAT5B STAT6 FMNL1 LYN SMAP2 CYTH1 ARAP1 ADGRE5 HLA.E CSF2RB WIPF1 HCK NBEAL2 THEMIS2 ARHGAP45 ARHGAP30 AKNA ELF4 C10ORF54 EHBP1L1 HCLS1 MYO1F WAS NCF2 HLA.B GMIP NLRC5 DOCK8 LILRB3 NADK VASP PPP1R18 TRIM25 STAT5A SBNO2 GRK2 ARHGEF1 CDC42SE1 ARHGAP27 TLR8 HLA.A ITGAX ADAM8 SUN2 GPSM3 PIK3CD PLCB2 RASSF5 UNC…	0.101995	#440154	0.5	0	5	0.995711
													243	8.10998	-1.00488	Cluster 0	Positive Regulation Of Protein Polyubiquitination (GO:1902916)	SPSB4 GABARAP PRKN DDX3X XIAP PTPN22 UBE2V1 NOD2 UBE2V2 MARCHF7 UBE2N UBE2N UBE2V2 PTPN22 UBE2V1 DDX3X GABARAP NOD2 XIAP SPSB4 RPP30 SRP14 PRPF18 SUMO1 SKP1 CASP3 PSMA3 PSMA2 SRP19 RP11.288E14.2 CD53 EVI2B FAM49B LILRA2 MEFV B2M SRP9 FAM103A1 IP6K3 AOAH UBE2D3 H2AFZ BCAS2 MORF4L1 ABRACL EIF4E CALM2 POMP CLEC7A TMEM71 GTF2A2 PSMA4 NLRP12 LRRC25 SNRPB2 ATP6V1G1 C11ORF58 LILRA6 SUB1 SNRPE STK17B ERV…	0.0253964	#440154	0.5	0	12	1.29761		243	8.10998	-1.00488	Cluster 0	Positive Regulation Of Protein Polyubiquitination (GO:1902916)	SPSB4 GABARAP PRKN DDX3X XIAP PTPN22 UBE2V1 NOD2 UBE2V2 MARCHF7 UBE2N UBE2N UBE2V2 PTPN22 UBE2V1 DDX3X GABARAP NOD2 XIAP SPSB4 RPP30 SRP14 PRPF18 SUMO1 SKP1 CASP3 PSMA3 PSMA2 SRP19 RP11.288E14.2 CD53 EVI2B FAM49B LILRA2 MEFV B2M SRP9 FAM103A1 IP6K3 AOAH UBE2D3 H2AFZ BCAS2 MORF4L1 ABRACL EIF4E CALM2 POMP CLEC7A TMEM71 GTF2A2 PSMA4 NLRP12 LRRC25 SNRPB2 ATP6V1G1 C11ORF58 LILRA6 SUB1 SNRPE STK17B ERV…	0.620638	#440154	0.5	0	5	0.603581
													244	9.56928	-1.88294	Cluster 0	Positive Regulation Of Interferon-Alpha Production (GO:0032727)	DDX3X NMB DHX9 STAT1 NMBR HSPD1 IFIH1 MAVS TBK1 IRF5 DHX36 IRF3 TLR9 RIPK2 TLR8 IRF7 TLR7 SETD2 TLR4 RIGI TLR3 LYN TRIM25 MX2 OAS2 TLR8 NCF2 LCP1 HCK TAP1 NOD2 MX1 THEMIS2 LILRB2 IFIH1 STAT1 PARP14 IRF7 OAS1 CTSS TLR4 ELF4 TLR2 HELZ2 HCLS1 IRF5 DOCK2 PRKCD MYO1G NCF1 CSF2RB PIK3R5 LILRB3 OAS3 TNFRSF1B ARHGAP30 ARAP1 SAMD9 GMIP DDX60L FMNL1 STAT6 ADAR LAPTM5 ITGAX LITAF NFKB2 NCF1B PTPN6 SMAP2 AP5…	2.96939e-07	#440154	0.5	0	12	3.76367		244	9.56928	-1.88294	Cluster 0	Positive Regulation Of Interferon-Alpha Production (GO:0032727)	DDX3X NMB DHX9 STAT1 NMBR HSPD1 IFIH1 MAVS TBK1 IRF5 DHX36 IRF3 TLR9 RIPK2 TLR8 IRF7 TLR7 SETD2 TLR4 RIGI TLR3 LYN TRIM25 MX2 OAS2 TLR8 NCF2 LCP1 HCK TAP1 NOD2 MX1 THEMIS2 LILRB2 IFIH1 STAT1 PARP14 IRF7 OAS1 CTSS TLR4 ELF4 TLR2 HELZ2 HCLS1 IRF5 DOCK2 PRKCD MYO1G NCF1 CSF2RB PIK3R5 LILRB3 OAS3 TNFRSF1B ARHGAP30 ARAP1 SAMD9 GMIP DDX60L FMNL1 STAT6 ADAR LAPTM5 ITGAX LITAF NFKB2 NCF1B PTPN6 SMAP2 AP5…	0.000939529	#440154	0.5	0	12	2.01354
													245	9.61939	-1.99397	Cluster 0	Positive Regulation Of Interferon-Beta Production (GO:0032728)	HSP90AA1 TOMM70 PTPN11 ISG15 OAS1 STING1 TLR2 IRF1 POLR3A MAVS POLR3B POLR3C OAS2 IRF5 POLR3D OAS3 POLR3F IRF3 POLR3G TLR9 TLR8 IRF7 TLR7 TRIM56 TLR4 RIGI TLR3 DDX3X DHX9 IFIH1 RNF135 TBK1 RIPK2 RIOK3 FLOT1 TRIM65 OAS2 MX2 OAS1 TRIM25 LYN MX1 HELZ2 OAS3 TAP1 HCK IFIT3 LILRB2 NCF2 TLR2 IRF7 TLR8 NOD2 DHX58 THEMIS2 PARP14 LILRB3 TNFRSF1B CMPK2 ELF4 IFIT2 PARP10 NCF1 IRF1 NADK GMIP DDX60L IFIH1 PILR…	2.21035e-06	#440154	0.5	0	12	3.32777		245	9.61939	-1.99397	Cluster 0	Positive Regulation Of Interferon-Beta Production (GO:0032728)	HSP90AA1 TOMM70 PTPN11 ISG15 OAS1 STING1 TLR2 IRF1 POLR3A MAVS POLR3B POLR3C OAS2 IRF5 POLR3D OAS3 POLR3F IRF3 POLR3G TLR9 TLR8 IRF7 TLR7 TRIM56 TLR4 RIGI TLR3 DDX3X DHX9 IFIH1 RNF135 TBK1 RIPK2 RIOK3 FLOT1 TRIM65 OAS2 MX2 OAS1 TRIM25 LYN MX1 HELZ2 OAS3 TAP1 HCK IFIT3 LILRB2 NCF2 TLR2 IRF7 TLR8 NOD2 DHX58 THEMIS2 PARP14 LILRB3 TNFRSF1B CMPK2 ELF4 IFIT2 PARP10 NCF1 IRF1 NADK GMIP DDX60L IFIH1 PILR…	0.00186133	#440154	0.5	0	12	1.86509
													246	8.08409	-1.08929	Cluster 0	Positive Regulation Of Protein K63-linked Ubiquitination (GO:1902523)	DDX3X PTPN22 UBE2V1 NOD2 UBE2V2 UBE2N UBE2N DDX3X PTPN22 UBE2V2 UBE2V1 NOD2 PRPF18 UBE2D3 RPP30 PSMA3 CD53 STK17B LCP1 PSMA2 CASP3 IP6K3 PTPRC EVI2B FAM49B BZW1 B2M CYTIP CD48 EIF4E SUMO1 SAMSN1 DDX5 IL2RG CAPZA1 TMEM71 GFM2 SRSF3 AOAH RASSF5 H2AFZ RP11.288E14.2 PSMA4 BCAS2 CD3G EIF2S1 ABRACL SRP19 ARHGAP25 HCLS1 FAM103A1 HMGB1 LYN SRP9 CDC123 C6ORF62 TNFAIP8 GPR65 LDHB STK4 PARP8 ARF6 PIP4K2A RB…	0.00046289	#440154	0.5	0	12	2.16726		246	8.08409	-1.08929	Cluster 0	Positive Regulation Of Protein K63-linked Ubiquitination (GO:1902523)	DDX3X PTPN22 UBE2V1 NOD2 UBE2V2 UBE2N UBE2N DDX3X PTPN22 UBE2V2 UBE2V1 NOD2 PRPF18 UBE2D3 RPP30 PSMA3 CD53 STK17B LCP1 PSMA2 CASP3 IP6K3 PTPRC EVI2B FAM49B BZW1 B2M CYTIP CD48 EIF4E SUMO1 SAMSN1 DDX5 IL2RG CAPZA1 TMEM71 GFM2 SRSF3 AOAH RASSF5 H2AFZ RP11.288E14.2 PSMA4 BCAS2 CD3G EIF2S1 ABRACL SRP19 ARHGAP25 HCLS1 FAM103A1 HMGB1 LYN SRP9 CDC123 C6ORF62 TNFAIP8 GPR65 LDHB STK4 PARP8 ARF6 PIP4K2A RB…	0.783482	#440154	0.5	0	5	0.552985
													247	9.5281	-1.34287	Cluster 0	Positive Regulation Of Production Of Molecular Mediator Of Immune Response (GO:0002702)	IL10 XBP1 XCL1 SPHK2 WNT5A LAPTM5 SCIMP HLA-E IL2 SLC7A5 PTPRC IL6 IRF5 LACC1 TNFSF4 CLCF1 F2RL1 TLR9 VAMP3 GPI MZB1 CD86 PHB2 IL21 PHB1 PTPN22 NOD2 INAVA TRIM6 POLR2D FFAR3 DNAJB9 FFAR2 STX4 TNFRSF4 EPHB2 TNFRSF14 SASH3 TNFRSF1B LAPTM5 LILRB2 PILRA HCK PIK3R5 TNIP1 IRF5 NFKB2 NINJ1 OSCAR SLC15A3 EHD1 NOD2 BCL3 RHOG NCF2 MAN2B1 RNF19B LILRB3 LYN LITAF TAP1 THEMIS2 HCLS1 SPI1 RELB LGALS9 TCIRG1 TL…	1.79475e-05	#440154	0.5	0	12	2.873		247	9.5281	-1.34287	Cluster 0	Positive Regulation Of Production Of Molecular Mediator Of Immune Response (GO:0002702)	IL10 XBP1 XCL1 SPHK2 WNT5A LAPTM5 SCIMP HLA-E IL2 SLC7A5 PTPRC IL6 IRF5 LACC1 TNFSF4 CLCF1 F2RL1 TLR9 VAMP3 GPI MZB1 CD86 PHB2 IL21 PHB1 PTPN22 NOD2 INAVA TRIM6 POLR2D FFAR3 DNAJB9 FFAR2 STX4 TNFRSF4 EPHB2 TNFRSF14 SASH3 TNFRSF1B LAPTM5 LILRB2 PILRA HCK PIK3R5 TNIP1 IRF5 NFKB2 NINJ1 OSCAR SLC15A3 EHD1 NOD2 BCL3 RHOG NCF2 MAN2B1 RNF19B LILRB3 LYN LITAF TAP1 THEMIS2 HCLS1 SPI1 RELB LGALS9 TCIRG1 TL…	0.542494	#440154	0.5	0	5	0.632803
													248	8.47871	-1.14489	Cluster 0	Positive Regulation Of Phospholipase C Activity (GO:0010863)	PDGFRB PDGFRA P2RY12 GPR55 AVPR1A AVPR1B SELE ESR1 KIT GNAQ FGFR1 ANG NMUR1 PLCB2 ITK CD86 FLT1 PHB2 PTH PHB1 C5AR1 TXK LPAR2 HTR2A HTR2B ADRA1D FGF2 ARHGAP6 EGFR LPAR1 RASGRP4 GNA15 EDNRA P2RY6 S1PR4 HRAS C10ORF54 GNAI2 SPI1 HCK PLCB2 ARAP1 PLEKHO2 GPSM3 ITGAX ARRB2 MYO1F TGFB1 FMNL1 ABTB1 LILRB3 LRRC25 HLA.E RIN3 WIPF1 TLN1 NFAM1 VASP ZYX WAS TCIRG1 THEMIS2 MYO9B C5AR1 IL17RA SIGLEC9 CYTH4 PPP1…	1.17754e-05	#440154	0.5	0	12	2.96451		248	8.47871	-1.14489	Cluster 0	Positive Regulation Of Phospholipase C Activity (GO:0010863)	PDGFRB PDGFRA P2RY12 GPR55 AVPR1A AVPR1B SELE ESR1 KIT GNAQ FGFR1 ANG NMUR1 PLCB2 ITK CD86 FLT1 PHB2 PTH PHB1 C5AR1 TXK LPAR2 HTR2A HTR2B ADRA1D FGF2 ARHGAP6 EGFR LPAR1 RASGRP4 GNA15 EDNRA P2RY6 S1PR4 HRAS C10ORF54 GNAI2 SPI1 HCK PLCB2 ARAP1 PLEKHO2 GPSM3 ITGAX ARRB2 MYO1F TGFB1 FMNL1 ABTB1 LILRB3 LRRC25 HLA.E RIN3 WIPF1 TLN1 NFAM1 VASP ZYX WAS TCIRG1 THEMIS2 MYO9B C5AR1 IL17RA SIGLEC9 CYTH4 PPP1…	0.00139194	#440154	0.5	0	12	1.92819
													249	8.99587	-1.04172	Cluster 0	Positive Regulation Of Interleukin-1 Beta Production (GO:0032731)	GSDMD WNT5A PYHIN1 CARD8 AZU1 TYROBP ISL1 IL6 LCP1 IFNG PYDC1 TLR8 TRIM16 TLR6 NAIP TLR4 TMEM106A APP MEFV NOD2 NLRC4 TNF HSPB1 INAVA PYCARD CASP8 PANX1 CLEC7A STMP1 IFI16 NLRP3 RIPK2 NLRP1 NLRP2 CASP1 CD36 GBP5 EGR1 FZD5 STAT3 IL17A P2RX7 MYD88 AIM2 NLRP12 F2RL1 MNDA LILRP2 ORM2 ORM1 LILRA2 MALT1 USP50 CCL3 CCL19 LGALS9 JAK2 NCF2 TLR8 HCK CTSS LILRB3 TLR2 THEMIS2 LYN LILRB2 ITGAX AOAH NOD2 MYO1F…	2.96993e-08	#440154	0.5	0	12	4.26363		249	8.99587	-1.04172	Cluster 0	Positive Regulation Of Interleukin-1 Beta Production (GO:0032731)	GSDMD WNT5A PYHIN1 CARD8 AZU1 TYROBP ISL1 IL6 LCP1 IFNG PYDC1 TLR8 TRIM16 TLR6 NAIP TLR4 TMEM106A APP MEFV NOD2 NLRC4 TNF HSPB1 INAVA PYCARD CASP8 PANX1 CLEC7A STMP1 IFI16 NLRP3 RIPK2 NLRP1 NLRP2 CASP1 CD36 GBP5 EGR1 FZD5 STAT3 IL17A P2RX7 MYD88 AIM2 NLRP12 F2RL1 MNDA LILRP2 ORM2 ORM1 LILRA2 MALT1 USP50 CCL3 CCL19 LGALS9 JAK2 NCF2 TLR8 HCK CTSS LILRB3 TLR2 THEMIS2 LYN LILRB2 ITGAX AOAH NOD2 MYO1F…	0.0023888	#440154	0.5	0	12	1.81091
													250	8.92366	-1.06699	Cluster 0	Positive Regulation Of Interleukin-1 Production (GO:0032732)	GSDMD IL16 WNT5A PYHIN1 CARD8 AZU1 TYROBP ISL1 IL6 LCP1 IFNG PYDC1 TLR8 TRIM16 IGHD TLR6 NAIP TLR4 TMEM106A APP TMED10 MEFV HMGB1 NOD2 NLRC4 TNF HSPB1 INAVA PYCARD CASP8 PANX1 CLEC7A STMP1 IFI16 NLRP3 S100A13 RIPK2 NLRP1 NLRP2 CASP1 CD36 GBP5 EGR1 FZD5 STAT3 IL17A P2RX7 MYD88 AIM2 NLRP12 NLRP10 F2RL1 MNDA SAA1 LILRP2 ORM2 ORM1 LILRA2 MALT1 USP50 CCL3 CCL19 LGALS9 JAK2 NCF2 TLR8 HCK CTSS LILRB3 TH…	5.44738e-07	#440154	0.5	0	12	3.63191		250	8.92366	-1.06699	Cluster 0	Positive Regulation Of Interleukin-1 Production (GO:0032732)	GSDMD IL16 WNT5A PYHIN1 CARD8 AZU1 TYROBP ISL1 IL6 LCP1 IFNG PYDC1 TLR8 TRIM16 IGHD TLR6 NAIP TLR4 TMEM106A APP TMED10 MEFV HMGB1 NOD2 NLRC4 TNF HSPB1 INAVA PYCARD CASP8 PANX1 CLEC7A STMP1 IFI16 NLRP3 S100A13 RIPK2 NLRP1 NLRP2 CASP1 CD36 GBP5 EGR1 FZD5 STAT3 IL17A P2RX7 MYD88 AIM2 NLRP12 NLRP10 F2RL1 MNDA SAA1 LILRP2 ORM2 ORM1 LILRA2 MALT1 USP50 CCL3 CCL19 LGALS9 JAK2 NCF2 TLR8 HCK CTSS LILRB3 TH…	0.00636131	#440154	0.5	0	12	1.59823
													251	8.67375	-0.883884	Cluster 0	Positive Regulation Of Phagocytosis (GO:0050766)	TUB IL15 SFTPD APLP2 APOA2 AZU1 MERTK IL1B PTPRC RAB31 FCGR2B APOA1 IFNG SPACA3 CALR GAS6 DOCK2 FCN1 FPR2 TNF IL2RG PTPRJ TREM2 C4A SIRPB1 PYCARD UXT C4B CLEC7A CD300LF FCER1G LYAR IL15RA CAMK1D AHSG SLC11A1 NCKAP1L RAB27A CYBA ANO6 IL2RB F2RL1 CD47 FCN2 FCN3 COLEC11 COLEC10 SIRPG PLA2G5 TULP1 GATA2 CFP C2 C3 LMAN2 SIRPA MYO18A CCL2 PLCG2 MBL2 HCK ARAP1 NCF2 TLR2 SIGLEC9 SPI1 CTSS ITGAX THEMIS2 P…	1.27182e-09	#440154	0.5	0	12	4.94779		251	8.67375	-0.883884	Cluster 0	Positive Regulation Of Phagocytosis (GO:0050766)	TUB IL15 SFTPD APLP2 APOA2 AZU1 MERTK IL1B PTPRC RAB31 FCGR2B APOA1 IFNG SPACA3 CALR GAS6 DOCK2 FCN1 FPR2 TNF IL2RG PTPRJ TREM2 C4A SIRPB1 PYCARD UXT C4B CLEC7A CD300LF FCER1G LYAR IL15RA CAMK1D AHSG SLC11A1 NCKAP1L RAB27A CYBA ANO6 IL2RB F2RL1 CD47 FCN2 FCN3 COLEC11 COLEC10 SIRPG PLA2G5 TULP1 GATA2 CFP C2 C3 LMAN2 SIRPA MYO18A CCL2 PLCG2 MBL2 HCK ARAP1 NCF2 TLR2 SIGLEC9 SPI1 CTSS ITGAX THEMIS2 P…	0.0221799	#440154	0.5	0	12	1.32702
													252	8.87615	-1.48261	Cluster 0	Positive Regulation Of Interleukin-10 Production (GO:0032733)	SYK TSLP STAT3 XCL1 IL13 ISG15 IL4 PRKCZ IL6 IL23A IRF4 TNFSF4 F2RL1 TLR9 CD28 CD40LG LILRP2 CD46 TLR4 HMGB1 NOD2 HSPD1 INAVA PYCARD CLEC7A IL12B PIBF1 PLCG2 LGALS9 TIGIT LCP1 NCF2 HCK NOD2 TLR8 HCLS1 LYN TAP1 THEMIS2 TNFRSF1B LILRB2 CTSS TLR2 LILRB3 LITAF WIPF1 SMAP2 RASSF5 HLA.E GBP2 FMNL1 PILRA CSF2RB LAPTM5 MX2 STX11 ARHGAP30 CD53 PIK3R5 ITGAX TLR4 EVI2B RHOG GPSM3 WAS HLA.B DOCK2 HLA.A CYTH1…	9.77478e-07	#440154	0.5	0	12	3.50495		252	8.87615	-1.48261	Cluster 0	Positive Regulation Of Interleukin-10 Production (GO:0032733)	SYK TSLP STAT3 XCL1 IL13 ISG15 IL4 PRKCZ IL6 IL23A IRF4 TNFSF4 F2RL1 TLR9 CD28 CD40LG LILRP2 CD46 TLR4 HMGB1 NOD2 HSPD1 INAVA PYCARD CLEC7A IL12B PIBF1 PLCG2 LGALS9 TIGIT LCP1 NCF2 HCK NOD2 TLR8 HCLS1 LYN TAP1 THEMIS2 TNFRSF1B LILRB2 CTSS TLR2 LILRB3 LITAF WIPF1 SMAP2 RASSF5 HLA.E GBP2 FMNL1 PILRA CSF2RB LAPTM5 MX2 STX11 ARHGAP30 CD53 PIK3R5 ITGAX TLR4 EVI2B RHOG GPSM3 WAS HLA.B DOCK2 HLA.A CYTH1…	0.0317009	#440154	0.5	0	12	1.24946
													253	9.79065	-2.07045	Cluster 0	Modulation By Symbiont Of Entry Into Host (GO:0052372)	CXCL8 TRIM62 RFPL1 RFPL2 FUCA2 RFPL3 HS3ST6 RFPL4A TRIM5 TRIM6 TRIM58 TRIM25 EXOC7 TRIM38 TRIM21 TRIM22 TRIM34 RFPL4AL1 EXOC2 TRIM68 NECTIN2 TRIM25 MX2 TRIM21 HELZ2 PARP14 DDX60L LILRB2 DHX58 TRIM22 IFIT3 RFPL4A NCF2 OAS2 RFPL2 HCK PIK3R5 TLR2 LYN RNF19B TNIP1 TAP1 CMPK2 ELF4 GBP2 LITAF SBNO2 TLR8 TNFRSF1B IFIT2 TNFAIP2 ADGRE2 EHD1 EPSTI1 OAS1 RSAD2 VASP BCL3 NFKB2 DTX3L ARAP1 OASL SAMD9 ZNFX1 NI…	1.47417e-08	#440154	0.5	0	12	4.41573		253	9.79065	-2.07045	Cluster 0	Modulation By Symbiont Of Entry Into Host (GO:0052372)	CXCL8 TRIM62 RFPL1 RFPL2 FUCA2 RFPL3 HS3ST6 RFPL4A TRIM5 TRIM6 TRIM58 TRIM25 EXOC7 TRIM38 TRIM21 TRIM22 TRIM34 RFPL4AL1 EXOC2 TRIM68 NECTIN2 TRIM25 MX2 TRIM21 HELZ2 PARP14 DDX60L LILRB2 DHX58 TRIM22 IFIT3 RFPL4A NCF2 OAS2 RFPL2 HCK PIK3R5 TLR2 LYN RNF19B TNIP1 TAP1 CMPK2 ELF4 GBP2 LITAF SBNO2 TLR8 TNFRSF1B IFIT2 TNFAIP2 ADGRE2 EHD1 EPSTI1 OAS1 RSAD2 VASP BCL3 NFKB2 DTX3L ARAP1 OASL SAMD9 ZNFX1 NI…	0.0245486	#440154	0.5	0	12	1.30499
													254	9.6569	-2.33823	Cluster 0	Positive Regulation Of Peptidyl-Serine Phosphorylation Of STAT Protein (GO:0033141)	IFNA6 IFNA5 IFNA14 IFNA8 IFNA7 IFNA2 IFNA16 IFNA17 IFNA4 LIF IFNW1 IFNE IFNG IFNB1 IFNK IFNA21 IFNA10 IFNB1 IFNW1 IFNE LIF IFNK IFNG CSF2 IFNA1 CD274 MX1 IFIT2 IFIT3 OAS2 STAT1 OAS3 OASL SNRPCP4 SAMD9 DHX58 CXCL11 CXCL10 PTTG4P DUSP5 RSAD2 IER3 EPSTI1 NFKB1 IFIT1 IMPDH1P10 ZC3H12A IFIH1 TNF CMPK2 IL2RA CCR7 MX2 HELZ2 RNF19B IL17A SOD2 DDX60L ICAM1 HERC6 BMS1P22 CLCF1 TRAF1 KRT34 PLAUR USP18 SERPI…	0.0313475	#440154	0.5	0	12	1.2519		254	9.6569	-2.33823	Cluster 0	Positive Regulation Of Peptidyl-Serine Phosphorylation Of STAT Protein (GO:0033141)	IFNA6 IFNA5 IFNA14 IFNA8 IFNA7 IFNA2 IFNA16 IFNA17 IFNA4 LIF IFNW1 IFNE IFNG IFNB1 IFNK IFNA21 IFNA10 IFNB1 IFNW1 IFNE LIF IFNK IFNG CSF2 IFNA1 CD274 MX1 IFIT2 IFIT3 OAS2 STAT1 OAS3 OASL SNRPCP4 SAMD9 DHX58 CXCL11 CXCL10 PTTG4P DUSP5 RSAD2 IER3 EPSTI1 NFKB1 IFIT1 IMPDH1P10 ZC3H12A IFIH1 TNF CMPK2 IL2RA CCR7 MX2 HELZ2 RNF19B IL17A SOD2 DDX60L ICAM1 HERC6 BMS1P22 CLCF1 TRAF1 KRT34 PLAUR USP18 SERPI…	0.000347723	#440154	0.5	0	12	2.22938
													255	8.28677	-0.631358	Cluster 0	Positive Regulation Of Reactive Oxygen Species Biosynthetic Process (GO:1903428)	MMP8 DUOXA1 DUOXA2 RAB27A CYBA PLCG2 ZNF205 CD36 TLR6 SLC5A3 GRIN1 TLR4 TLR4 NCF2 CTSS ARAP1 TLR8 TLR6 IL17RA CYBB TLR1 NLRC4 HCK TLR2 THEMIS2 AP5B1 PLBD1 VNN2 NADK PLXNC1 HK3 MNDA OGFRL1 ITGAM CSF2RB ITGAX LYN ACSL1 FPR2 ALOX5 SIGLEC9 LRRK2 SIRPA P2RY13 LILRB3 GLT1D1 ARRB2 FGR NFAM1 MYO1F RNF149 AOAH MXD1 EHBP1L1 CCR1 RASSF2 CR1 PTAFR FGL2 SPI1 CYBA DOCK2 PLEKHO2 APOBR CLEC7A GCA VASP EVI2B EFHD…	1.19233e-10	#440154	0.5	0	12	5.4618		255	8.28677	-0.631358	Cluster 0	Positive Regulation Of Reactive Oxygen Species Biosynthetic Process (GO:1903428)	MMP8 DUOXA1 DUOXA2 RAB27A CYBA PLCG2 ZNF205 CD36 TLR6 SLC5A3 GRIN1 TLR4 TLR4 NCF2 CTSS ARAP1 TLR8 TLR6 IL17RA CYBB TLR1 NLRC4 HCK TLR2 THEMIS2 AP5B1 PLBD1 VNN2 NADK PLXNC1 HK3 MNDA OGFRL1 ITGAM CSF2RB ITGAX LYN ACSL1 FPR2 ALOX5 SIGLEC9 LRRK2 SIRPA P2RY13 LILRB3 GLT1D1 ARRB2 FGR NFAM1 MYO1F RNF149 AOAH MXD1 EHBP1L1 CCR1 RASSF2 CR1 PTAFR FGL2 SPI1 CYBA DOCK2 PLEKHO2 APOBR CLEC7A GCA VASP EVI2B EFHD…	0.115168	#440154	0.5	0	5	0.969334
													256	9.53527	-2.37201	Cluster 0	Positive Regulation Of Peptidyl-Serine Phosphorylation (GO:0033138)	TGFB1 IL11 HSP90AA1 SH2D3A SH2D3C BDNF CAV1 LIF OSM AXIN1 BRAF VEGFA HAX1 IFNE SFRP2 PINK1 IL6 IFNG IFNK PFN2 CNOT9 GAS6 MAD2L2 RAF1 APP TENM1 BCAR3 RAMP3 OPRD1 CSF3 CREBL2 PARK7 TNF ARAF EGFR STK4 PDCD10 PAK1 TRIM6 NTF3 NTF4 AKT1 RIPK2 AMH FNIP2 SNCA STOX1 FNIP1 NTRK3 IFNA14 WNT3A IFNA16 IFNA17 SH2D1A ATP2B4 IRGM NGF IFNW1 LATS1 CAPRIN2 PRKD1 HCLS1 EIF4G1 SPRY2 AVP PRKD2 IFNA10 CD44 IFNA6 DOCK7 …	0.083868	#440154	0.5	0	5	1.0382		256	9.53527	-2.37201	Cluster 0	Positive Regulation Of Peptidyl-Serine Phosphorylation (GO:0033138)	TGFB1 IL11 HSP90AA1 SH2D3A SH2D3C BDNF CAV1 LIF OSM AXIN1 BRAF VEGFA HAX1 IFNE SFRP2 PINK1 IL6 IFNG IFNK PFN2 CNOT9 GAS6 MAD2L2 RAF1 APP TENM1 BCAR3 RAMP3 OPRD1 CSF3 CREBL2 PARK7 TNF ARAF EGFR STK4 PDCD10 PAK1 TRIM6 NTF3 NTF4 AKT1 RIPK2 AMH FNIP2 SNCA STOX1 FNIP1 NTRK3 IFNA14 WNT3A IFNA16 IFNA17 SH2D1A ATP2B4 IRGM NGF IFNW1 LATS1 CAPRIN2 PRKD1 HCLS1 EIF4G1 SPRY2 AVP PRKD2 IFNA10 CD44 IFNA6 DOCK7 …	0.713603	#440154	0.5	0	5	0.573272
													257	8.94946	-1.40275	Cluster 0	Positive Regulation Of Interleukin-12 Production (GO:0032735)	SYK IL16 LAPTM5 TIRAP SCIMP ISL1 HLA-G MAPK14 IL17A MAPK11 TLR2 IL23A IRF5 TNFSF4 IFNG LTB TLR9 CD40LG TLR4 PLCB1 TLR3 CD40 IL23R HMGB1 HSPD1 MDK CLEC7A RIPK2 IL12B PLCG2 CCR7 CCL19 LGALS9 LAPTM5 HCK LYN HCLS1 LCP1 NCF2 THEMIS2 TLR8 PILRA TNFRSF1B TLR2 LILRB2 CD53 LGALS9 CYTH4 CTSS PIK3R5 ITGAX LILRB3 GPSM3 PTAFR PTPN6 FMNL1 WAS NOD2 HLA.E LSP1 NCF1 ARRB2 CSF2RB SPI1 ARHGAP30 SMAP2 GMIP WIPF1 SIG…	8.71401e-09	#440154	0.5	0	12	4.52989		257	8.94946	-1.40275	Cluster 0	Positive Regulation Of Interleukin-12 Production (GO:0032735)	SYK IL16 LAPTM5 TIRAP SCIMP ISL1 HLA-G MAPK14 IL17A MAPK11 TLR2 IL23A IRF5 TNFSF4 IFNG LTB TLR9 CD40LG TLR4 PLCB1 TLR3 CD40 IL23R HMGB1 HSPD1 MDK CLEC7A RIPK2 IL12B PLCG2 CCR7 CCL19 LGALS9 LAPTM5 HCK LYN HCLS1 LCP1 NCF2 THEMIS2 TLR8 PILRA TNFRSF1B TLR2 LILRB2 CD53 LGALS9 CYTH4 CTSS PIK3R5 ITGAX LILRB3 GPSM3 PTAFR PTPN6 FMNL1 WAS NOD2 HLA.E LSP1 NCF1 ARRB2 CSF2RB SPI1 ARHGAP30 SMAP2 GMIP WIPF1 SIG…	0.0524462	#440154	0.5	0	5	1.14014
													258	8.94495	-1.57299	Cluster 0	Positive Regulation Of Interleukin-13 Production (GO:0032736)	IL4 PRKCZ IRF4 TSLP SPHK2 TNFSF4 RARA IL18 LGALS9 HLA-E LGALS9 RARA IRF5 PRKCD TNFRSF14 RHOG TYMP LAPTM5 PTK2B BCL3 STXBP2 FBRS TCIRG1 PLEKHO1 TNIP1 PTPN6 NFKB2 HLA.A EHD1 CAMTA2 TFEB MYO1G HCK OGFR EFHD2 TAP1 OSCAR TNFRSF1B FMNL1 SPI1 TGFB1 UNC93B1 SBNO2 ARAP1 THEMIS2 PILRA NFKBIE WAS GPSM3 CSK TSLP PARP10 PPP1R18 TRAF1 NCF1 MYO9B STAT6 DOK3 NOD2 LILRB2 RELB APOBR C15ORF39 HLA.B TRIM25 CYTH1 MAN…	6.47168e-05	#440154	0.5	0	12	2.59449		258	8.94495	-1.57299	Cluster 0	Positive Regulation Of Interleukin-13 Production (GO:0032736)	IL4 PRKCZ IRF4 TSLP SPHK2 TNFSF4 RARA IL18 LGALS9 HLA-E LGALS9 RARA IRF5 PRKCD TNFRSF14 RHOG TYMP LAPTM5 PTK2B BCL3 STXBP2 FBRS TCIRG1 PLEKHO1 TNIP1 PTPN6 NFKB2 HLA.A EHD1 CAMTA2 TFEB MYO1G HCK OGFR EFHD2 TAP1 OSCAR TNFRSF1B FMNL1 SPI1 TGFB1 UNC93B1 SBNO2 ARAP1 THEMIS2 PILRA NFKBIE WAS GPSM3 CSK TSLP PARP10 PPP1R18 TRAF1 NCF1 MYO9B STAT6 DOK3 NOD2 LILRB2 RELB APOBR C15ORF39 HLA.B TRIM25 CYTH1 MAN…	0.171587	#440154	0.5	0	5	0.882757
													259	8.20276	-0.747762	Cluster 0	Positive Regulation Of Nitric-Oxide Synthase Biosynthetic Process (GO:0051770)	TLR2 IL33 NAMPT IFNG KDR TLR9 NOD2 TLR4 FCER2 JAK2 TLR8 NCF2 TLR2 TLR4 NOD2 LYN HCK NAMPT FPR2 CSF2RB LILRB3 TLR1 THEMIS2 VNN2 CTSS ITGAX AQP9 TREM1 GLT1D1 SMAP2 EVI2B P2RY13 RNF149 MNDA TNFRSF10C MXD1 NCF1B CLEC7A FPR1 TLR6 C5AR1 MYO1F NFAM1 FGR ALOX5 LCP1 IL17RA NCF1 ARAP1 NADK LITAF FMNL1 ARRB2 PTAFR PROK2 CLEC4E STX11 LILRB2 ACSL1 SSH2 WAS HCLS1 VASP FGL2 SIRPB1 ADAM8 CXCR2 SIGLEC9 CEACAM3 RA…	1.05519e-08	#440154	0.5	0	12	4.48833		259	8.20276	-0.747762	Cluster 0	Positive Regulation Of Nitric-Oxide Synthase Biosynthetic Process (GO:0051770)	TLR2 IL33 NAMPT IFNG KDR TLR9 NOD2 TLR4 FCER2 JAK2 TLR8 NCF2 TLR2 TLR4 NOD2 LYN HCK NAMPT FPR2 CSF2RB LILRB3 TLR1 THEMIS2 VNN2 CTSS ITGAX AQP9 TREM1 GLT1D1 SMAP2 EVI2B P2RY13 RNF149 MNDA TNFRSF10C MXD1 NCF1B CLEC7A FPR1 TLR6 C5AR1 MYO1F NFAM1 FGR ALOX5 LCP1 IL17RA NCF1 ARAP1 NADK LITAF FMNL1 ARRB2 PTAFR PROK2 CLEC4E STX11 LILRB2 ACSL1 SSH2 WAS HCLS1 VASP FGL2 SIRPB1 ADAM8 CXCR2 SIGLEC9 CEACAM3 RA…	0.0317009	#440154	0.5	0	12	1.24946
													260	8.92184	-1.63052	Cluster 0	Positive Regulation Of Interleukin-17 Production (GO:0032740)	TGFB1 IL21 PHB1 IL15 IL23R RFTN1 SPHK1 NR1H4 OSM LY9 NOD2 IL18 TYK2 IL2 SLC7A5 MYD88 IL6 IL23A IL12B CCL1 SLAMF6 PRKCQ ZBTB7B JAK2 TNFRSF1B TNIP1 HCK LILRB2 PIK3R5 IL10RA NOD2 PILRA BCL3 NFKB2 LAPTM5 THEMIS2 TAP1 MYO1G LCP2 FMNL1 PPP1R18 LYN EHD1 RHOG TRAF1 TCIRG1 RNF19B OSCAR ELF4 HCLS1 STX11 TGFB1 CYTH1 SBNO2 GPSM3 HLA.E ZC3H12A NINJ1 RASSF5 RELB NFKB1 LILRB3 HLA.A MYO9B LITAF PRKCD ARAP1 LGALS…	1.71725e-06	#440154	0.5	0	12	3.38258		260	8.92184	-1.63052	Cluster 0	Positive Regulation Of Interleukin-17 Production (GO:0032740)	TGFB1 IL21 PHB1 IL15 IL23R RFTN1 SPHK1 NR1H4 OSM LY9 NOD2 IL18 TYK2 IL2 SLC7A5 MYD88 IL6 IL23A IL12B CCL1 SLAMF6 PRKCQ ZBTB7B JAK2 TNFRSF1B TNIP1 HCK LILRB2 PIK3R5 IL10RA NOD2 PILRA BCL3 NFKB2 LAPTM5 THEMIS2 TAP1 MYO1G LCP2 FMNL1 PPP1R18 LYN EHD1 RHOG TRAF1 TCIRG1 RNF19B OSCAR ELF4 HCLS1 STX11 TGFB1 CYTH1 SBNO2 GPSM3 HLA.E ZC3H12A NINJ1 RASSF5 RELB NFKB1 LILRB3 HLA.A MYO9B LITAF PRKCD ARAP1 LGALS…	0.0169829	#440154	0.5	0	12	1.38499
													261	9.17912	-0.644909	Cluster 0	Positive Regulation Of Nitric Oxide Metabolic Process (GO:1904407)	SMAD3 INSR EDN1 MMP8 HSP90AA1 KLF4 KLF2 ASS1 IL1B NOS1AP P2RX4 DDAH2 DDAH1 IFNG AGTR2 AGXT2 TLR6 TLR4 TMEM106A HSP90AB1 HBB CLU TNF PKD2 PTGS2 CLEC7A AKT1 CD36 TLR4 TLR2 ACSL1 LILRB2 NCF2 HCK STX11 RNF19B AQP9 PILRA TLR8 PTGS2 C5AR1 LILRB3 TNFRSF1B AP5B1 ITGAX TNFAIP2 BCL3 PIK3R5 CTSS PFKFB3 NOD2 ADGRE2 ZC3H12A TREM1 NINJ1 SIGLEC9 LYN OSCAR IL1B ARAP1 VASP SIRPA TNIP1 PLAUR SBNO2 NAMPT THEMIS2 TM…	4.6686e-12	#440154	0.5	0	12	6.16541		261	9.17912	-0.644909	Cluster 0	Positive Regulation Of Nitric Oxide Metabolic Process (GO:1904407)	SMAD3 INSR EDN1 MMP8 HSP90AA1 KLF4 KLF2 ASS1 IL1B NOS1AP P2RX4 DDAH2 DDAH1 IFNG AGTR2 AGXT2 TLR6 TLR4 TMEM106A HSP90AB1 HBB CLU TNF PKD2 PTGS2 CLEC7A AKT1 CD36 TLR4 TLR2 ACSL1 LILRB2 NCF2 HCK STX11 RNF19B AQP9 PILRA TLR8 PTGS2 C5AR1 LILRB3 TNFRSF1B AP5B1 ITGAX TNFAIP2 BCL3 PIK3R5 CTSS PFKFB3 NOD2 ADGRE2 ZC3H12A TREM1 NINJ1 SIGLEC9 LYN OSCAR IL1B ARAP1 VASP SIRPA TNIP1 PLAUR SBNO2 NAMPT THEMIS2 TM…	0.792581	#440154	0.5	0	5	0.550478
													262	9.03035	-0.698632	Cluster 0	Positive Regulation Of Nitric Oxide Biosynthetic Process (GO:0045429)	SMAD3 INSR EDN1 MMP8 HSP90AA1 KLF4 KLF2 ASS1 IL1B NOS1AP P2RX4 DDAH2 DDAH1 IFNG AGTR2 AGXT2 TLR6 TLR4 HSP90AB1 HBB CLU TNF PKD2 PTGS2 CLEC7A AKT1 CD36 TLR4 TLR2 ACSL1 NCF2 LILRB2 HCK AQP9 STX11 TLR8 AP5B1 LILRB3 C5AR1 PTGS2 TREM1 ITGAX CTSS RNF19B PILRA TNFRSF1B VASP BCL3 MCL1 ARAP1 NOD2 TNFAIP2 PIK3R5 NAMPT PFKFB3 LYN TMEM127 TRIM25 SIGLEC9 SBNO2 SIRPA THEMIS2 ZC3H12A ADGRE2 CLEC7A FOSL2 OSCAR I…	2.09664e-10	#440154	0.5	0	12	5.33924		262	9.03035	-0.698632	Cluster 0	Positive Regulation Of Nitric Oxide Biosynthetic Process (GO:0045429)	SMAD3 INSR EDN1 MMP8 HSP90AA1 KLF4 KLF2 ASS1 IL1B NOS1AP P2RX4 DDAH2 DDAH1 IFNG AGTR2 AGXT2 TLR6 TLR4 HSP90AB1 HBB CLU TNF PKD2 PTGS2 CLEC7A AKT1 CD36 TLR4 TLR2 ACSL1 NCF2 LILRB2 HCK AQP9 STX11 TLR8 AP5B1 LILRB3 C5AR1 PTGS2 TREM1 ITGAX CTSS RNF19B PILRA TNFRSF1B VASP BCL3 MCL1 ARAP1 NOD2 TNFAIP2 PIK3R5 NAMPT PFKFB3 LYN TMEM127 TRIM25 SIGLEC9 SBNO2 SIRPA THEMIS2 ZC3H12A ADGRE2 CLEC7A FOSL2 OSCAR I…	0.403802	#440154	0.5	0	5	0.696916
													263	8.65982	-1.97458	Cluster 0	Positive Regulation Of Neutrophil Migration (GO:1902624)	CXCL8 CAMK1D CD74 RIPOR2 DAPK2 NCKAP1L CCL21 XCL1 TIRAP MOSPD2 XG FUT4 THBS4 FUT7 MDK C1QBP RAC1 RAC2 CCR7 CCL19 DNM1L CD99 MCU LSP1 NCKAP1L RAC2 LGALS9 LAPTM5 HCLS1 TAP1 LCP1 HLA.DRB1 WAS PTPN6 CD53 GPSM3 HCK HLA.A FMNL1 CD74 STAT6 RHOG HLA.B CORO1A LYN CYBA ARRB2 PARVG MYO1G HLA.E EFHD2 ARHGAP4 ARHGAP30 SIPA1 CYTH4 SASH3 GMIP RPS6KA1 SPI1 THEMIS2 ARHGAP45 C10ORF54 PRKCD FUT7 STXBP2 SHKBP1 GRK2 …	0.000674293	#440154	0.5	0	12	2.08558		263	8.65982	-1.97458	Cluster 0	Positive Regulation Of Neutrophil Migration (GO:1902624)	CXCL8 CAMK1D CD74 RIPOR2 DAPK2 NCKAP1L CCL21 XCL1 TIRAP MOSPD2 XG FUT4 THBS4 FUT7 MDK C1QBP RAC1 RAC2 CCR7 CCL19 DNM1L CD99 MCU LSP1 NCKAP1L RAC2 LGALS9 LAPTM5 HCLS1 TAP1 LCP1 HLA.DRB1 WAS PTPN6 CD53 GPSM3 HCK HLA.A FMNL1 CD74 STAT6 RHOG HLA.B CORO1A LYN CYBA ARRB2 PARVG MYO1G HLA.E EFHD2 ARHGAP4 ARHGAP30 SIPA1 CYTH4 SASH3 GMIP RPS6KA1 SPI1 THEMIS2 ARHGAP45 C10ORF54 PRKCD FUT7 STXBP2 SHKBP1 GRK2 …	0.0026962	#440154	0.5	0	12	1.78462
[truncated: 5,143 more rows]

## Sheet: ST5
	ABCA2	ABCD1	ABCD2	ABI3	ABL1	ABL2	ACAN	ACE	ACER3	ACP5	ACSBG1	ACTL6A	ADA	ADAM10	ADAM9	ADARB1	ADCY1	ADD2	ADNP	ADORA2A	ADORA2B	AFG3L2	AGRN	AHR	AICDA	AIF1	AIFM1	AIM2	AIRE	AKIRIN1	AKT1S1	AKT2	ALCAM	ALKBH1	ALOX5	AMBRA1	AMIGO1	ANAPC2	ANGPT1	ANK2	ANKRD27	ANKS1A	ANO6	ANXA1	ANXA2	ANXA3	APAF1	APBB1IP	APOE
[truncated: 67 more rows]
[truncated: 1,333 more columns]

[truncated: 1 more sheets: ST6]
